# Supplementary material for: Dynamics of bacterial and archaeal communities during horse bedding and green waste composting
Source: PeerJ. 2023 May 3;11:e15239. doi: 10.7717/peerj.15239 (PMC10163874; doi:10.7717/peerj.15239)
Supplement: Supplemental Information 1 [file peerj-11-15239-s001.xlsx]

## Sheet: Physicochemical data - Raw
Raw data and Shapiro-Wilk test for normality assesment
Phase	Parameters	Rep. 1	Rep.2	Rep. 3	Rep. 4	Shapiro-Wilk normality test (p < 0.01)
Litter	Temperature (°C)	38.73	38.18	38.65	37.38	0.3272
	Organic matter (%)	93.2	93.0	93.8	92.5	0.9573
	pH	7.23	7.35	7.31	7.58	0.4458
	Total carbon (%)	43.68	44.5	44.45	42.00	0.1808
	Total nitrogen (%)	1.42	1.53	1.36	1.15	0.7853
	C:N	31.73	29.08	32.72	36.75	0.8579
	Cellulose (%)	32.43	33.77	35.8	26.78	0.5340
	Hemicellulose (%)	14.59	15.48	16.49	18.74	0.7271
	Lignin (%)	18.9	18.47	19.25	12.6	0.0206
	NH4+ (mg kg-1)	161.17	92.67	212.17	192.17	0.5834
	NO2--NO3- (mg kg-1)	17.20	2.74	16.10	4.41	0.1349
Young	Temperature (°C)	67.73	69.73	68.40	65.20	0.7729
	Organic matter (%)	70.2	62.5	52.9	38.9	0.8918
	pH	7.06	7.14	7.42	7.68	0.6114
	Total carbon (%)	34.1	29.62	21.34	22.69	0.4969
	Total nitrogen (%)	1.11	NA	1.06	1.09	0.7804
	C:N	31.09	18.82	20.07	20.88	0.0552
	Cellulose (%)	10.33	11.83	11.19	10.1	0.5931
	Hemicellulose (%)	7.16	6.34	6.6	7.65	0.7790
	Lignin (%)	8.3	9.72	11.76	9.7	0.6023
	NH4+ (mg kg-1)	421.17	343.17	257.17	221.17	0.7416
	NO2--NO3- (mg kg-1)	26.00	18.70	4.08	6.03	0.4309
Middle	Temperature (°C)	62.08	63.8	62.23	60.33	0.7883
	Organic matter (%)	44.1	51.1	35.4	40.8	0.9776
	pH	7.7	7.67	7.76	7.75	0.4922
	Total carbon (%)	26.34	23.37	18.15	23.74	0.5184
	Total nitrogen (%)	1.14	1.07	0.98	1.14	0.2463
	C:N	23.01	21.81	18.52	20.66	0.9001
	Cellulose (%)	6.08	5.74	6.62	6.31	0.9975
	Hemicellulose (%)	6.91	4.76	6.35	4.98	0.3702
	Lignin (%)	8.99	6.23	6.26	9.69	0.1350
	NH4+ (mg kg-1)	14.07	73.87	57.77	8.77	0.3046
	NO2--NO3- (mg kg-1)	51.60	28.30	42.40	24.50	0.5823
Aged	Temperature (°C)	45.9	47.73	46.28	44.55	0.9318
	Organic matter (%)	29.9	25.9	32.9	37.9	0.9886
	pH	8.4	8.49	8.43	8.37	0.8500
	Total carbon (%)	22.64	22.26	19.4	23.67	0.4008
	Total nitrogen (%)	1.12	1.16	1.06	1.06	0.2616
	C:N	20.1	19.07	18.05	22.3	0.5459
	Cellulose (%)	4.61	6.47	4.85	6.06	0.3677
	Hemicellulose (%)	5.54	5.78	6.06	6.47	0.9133
	Lignin (%)	7.2	9.28	7.5	7.97	0.4258
	NH4+ (mg kg-1)	7.13	2.34	7.17	17.97	0.3417
	NO2--NO3- (mg kg-1)	42.30	38.80	8.41	9.48	0.084
Compost	Temperature (°C)	37.10	36.55	37.55	36.90	0.0762
	Organic matter (%)	26.0	24.8	23.7	23.2	0.7507
	pH	8.24	8.21	8.27	8.21	0.2725
	Total carbon (%)	16.6	18.11	19.88	19.34	0.6610
	Total nitrogen (%)	0.95	1.04	1.08	1.09	0.2874
	C:N	17.39	17.37	18.41	17.71	0.1772
	Cellulose (%)	3.74	3.2	4.12	4.37	0.8245
	Hemicellulose (%)	4.72	6.49	5.92	6.03	0.392
	Lignin (%)	5.74	5.64	6.94	7.65	0.3485
	NH4+ (mg kg-1)	4.13	6.08	6.06	5.48	0.1473
	NO2--NO3- (mg kg-1)	16.90	3.38	3.44	2.56	0.007*
*Data underwent a square root transformation before proceeding with the one-way ANOVA

## Sheet: Physicochemical data - Stats
One-way ANOVA followed by a Tukey’s multiple comparisons post hoc test
Comparison	Parameters	Adjusted p-values	Degree of freedom
Litter vs. Young	Temperature	<.001	15
	Organic matter	<.001	15
	pH	0.993	15
	Total carbon	<.001	15
	Total nitrogen	0.001	15
	C:N	<.001	15
	Cellulose	<.001	15
	Hemicellulose	<.001	15
	Lignin	<.001	15
	NH4+	0.005	15
	NO2--NO3-	0.987	15
Young vs. Middle	Temperature	<.001	15
	Organic matter	0.112	15
	pH	0.013	15
	Total carbon	0.622	15
	Total nitrogen	>.999	15
	C:N	0.99	15
	Cellulose	0.019	15
	Hemicellulose	0.507	15
	Lignin	0.524	15
	NH4+	<.001	15
	NO2--NO3-	0.142	15
Middle vs. Aged	Temperature	<.001	15
	Organic matter	0.222	15
	pH	<.001	15
	Total carbon	0.988	15
	Total nitrogen	0.996	15
	C:N	0.964	15
	Cellulose	0.983	15
	Hemicellulose	0.998	15
	Lignin	>.999	15
	NH4+	0.904	15
	NO2--NO3-	0.692	15
Aged vs Compost	Temperature	<.001	15
	Organic matter	0.614	15
	pH	0.393	15
	Total carbon	0.345	15
	Total nitrogen	0.823	15
	C:N	0.708	15
	Cellulose	0.715	15
	Hemicellulose	>.999	15
	Lignin	0.781	15
	NH4+	>.999	15
	NO2--NO3-	0.194	15
Litter vs. Middle	NO2--NO3-	0.059	15
Middle vs. Compost	NO2--NO3-	0.018	15

## Sheet: Alpha Diversity
Alpha diveristy
alphaDiv_Index	comparison	TestType	pvalue
Observed	Litter vs. Young	tTest	0.000230383
Chao1		tTest	0.000435289
se.chao1		tTest	0.845989
Shannon		tTest	0.040245
Simpson		tTest	0.0667859
InvSimpson		Wilcoxon	0.0985185
Fisher		tTest	0.000895295
Observed	Young vs. Middle	tTest	0.336665
Chao1		tTest	0.373475
se.chao1		tTest	0.609985
Shannon		tTest	0.864881
Simpson		tTest	0.657896
InvSimpson		Wilcoxon	0.68498
Fisher		tTest	0.300698
Observed	Middle vs. Aged	tTest	0.00413668
Chao1		tTest	0.00189918
se.chao1		tTest	0.0387618
Shannon		tTest	0.00429428
Simpson		tTest	0.00331153
InvSimpson		Wilcoxon	0.0307653
Fisher		tTest	0.000386286
Observed	Aged vs. Compost	tTest	0.0747076
Chao1		tTest	0.076696
se.chao1		tTest	0.343438
Shannon		tTest	0.00411622
Simpson		tTest	0.0152495
InvSimpson		Wilcoxon	0.000753259
Fisher		tTest	0.0052057

## Sheet: Beta Diversity
Beta diversity
Statistical test	significance probability
ANOSIM	0.001
Anova_CAP	‘**’
Anova_RDA	‘**’
Permanova	‘**’
