# Supplementary material for: Dynamics of bacterial and archaeal communities during horse bedding and green waste composting
Source: PeerJ. 2023 May 3;11:e15239. doi: 10.7717/peerj.15239 (PMC10163874; doi:10.7717/peerj.15239)
Supplement: Supplemental Information 2 [file peerj-11-15239-s002.xlsx]

## Sheet: Column Key
Column key - ESV table
ESV	Exact Sequence Variant
lowestTaxLevel	Lowest taxonomy level
anchorPerESV	Number of high counting sequences (collapsed into single ESVs if annotated by identical accessions)
NumberOfAmbiguousHits	Count of the multiple potential annoation based on conserved sequence at the amplified region
RefAnchorID	High counting sequence unique identifier
identity	Blast return information
coverageQ	Blast return information
chimera	Potential chimera flagging (uchime2_denovo)
AmbiguousLabels	Multiple potential annoation based on conserved sequence at the amplified region
subjectid	Blast return information
ESV_2	Secondary annotation, (rejected) blast return information
AmbiguousHits_2	Secondary annotation, (rejected) blast return information
AmbiguousLabels_2	Secondary annotation, (rejected) blast return information
subjectid_2	Secondary annotation, (rejected) blast return information
Id/Cov_2	Secondary annotation, (rejected) blast return information
Domain	Taxonomy
Phylum	Taxonomy
Class	Taxonomy
Order	Taxonomy
Family	Taxonomy
Genus	Taxonomy
Species	Taxonomy
anchorCollapsingDueToPrimer	Degenerate primer control
sequence	Anchor ESV sequence
db_seq	Blast return sequence (degenerate primer control is not inlcuded in identity %)
Column key - Differential abudnance (DA) ESV tables
ESV	ANCHOR Exact Sequence Variant (unique ID)
Phase A_raw	Condition A raw counts
Phase B_raw	Condition B raw counts
Phase A_rawStdDev	Condition A raw counts standard deviation
Phase B_rawStdDev	Condition B raw counts standard deviation
Phase A_rawMedian	Condition A raw counts median
Phase B_rawMedian	Condition B raw counts median
Phase A_size	Condition A sample count
Phase B_size	Condition B sample count
Raw_Regulation	raw counts A vs B (used to identify disagreements between normalisation/model strategies)
Phase A_DESeq	Condition A DEseq relatvie abundance
Phase B_DESeq	Condition B DEseq relatvie abundance
Final_Regulation	DEseq model A vs B (used to identify disagreements between normalisation/model strategies)
baseMean	DESeq's basemean output (used to identify disagreements between normalisation/model strategies)
log2FoldChange	Fold change (log base 2)
lfcSE	DESeq logfoldchangeStandard Error
stat	DESeq wald-statistic
pvalue	DESeq p-value
padj	DESeq false discovery rate correction (Benj-Hoch; pAdjustMethod)
errorBarUp	DESeq error bar
errorBarLow	DESeq error bar
lowestTaxLevel	Lowest taxonomy level
NumberOfAmbiguousHits	Count of the multiple potential annotation based on conserved sequence at the amplified region
anchorPerESV	Number of high counting sequences (collapsed into single ESVs if annotated by identical accessions)
RefAnchorID	High counting sequence unique identifier
identity	Blast return information
coverageQ	Blast return information
chimera	Potential chimera flagging (uchime2_denovo)
AmbiguousLabels	Multiple potential annotation based on conserved sequence at the amplified region
subjectid	Blast return information
ESV_2	Secondary annotation, (rejected) blast return information
AmbiguousHits_2	Secondary annotation, (rejected) blast return information
AmbiguousLabels_2	Secondary annotation, (rejected) blast return information
subjectid_2	Secondary annotation, (rejected) blast return information
Id/Cov_2	Secondary annotation, (rejected) blast return information
Domain	Taxonomy
Phylum	Taxonomy
Class	Taxonomy
Order	Taxonomy
Family	Taxonomy
Genus	Taxonomy
Species	Taxonomy
anchorCollapsingDueToPrimer	Degenerate primer control
sequence	Anchor ESV sequence
db_seq	Blast return sequence (degenerate primer control is not inlcuded in identity %)
Litter, Young Middle… 1, 2, 3, 4	Sum of ESV count in sample
total counts	Sums of counts in all 20 samples

## Sheet: ESV table
ESV	lowestTaxLevel	anchorPerSubESV	NumberOfAmbiguousHits	RefAnchorID	identity	coverageQ	chimera	AmbiguousLabels	subjectid	ESV_2	AmbiguousHits_2	AmbiguousLabels_2	subjectid_2	Id/Cov_2	Domain	Phylum	Class	Order	Family	Genus	Species	anchorCollapsingDueToPrimer	sequence	db_seq	Litter_1	Litter_2	Litter_3	Litter_4	Litter_Sum	Litter_Mean	Young_1	Young_2	Young_3	Young_4	Young_Sum	Young_Mean	Middle_1	Middle_2	Middle_3	Middle_4	Middle_Sum	Middle_Mean	Aged_1	Aged_2	Aged_3	Aged_4	Aged_Sum	Aged_Mean	Compost_1
Acetivibrio_1	G	1	0	Aged_3_116627	100	100	N	Acetivibrio	silva|EU160294.1.869	-	-	-	-	-	Bacteria	Firmicutes	Clostridia	Clostridiales	Ruminococcaceae	Acetivibrio	Acetivibrio	Aged_3_116627;Aged_1_17873	GGATTAGATACCCTGGTAGTCCACGCCGTAAACGATGGATACTAGGTGTAGGAGGTATCGACCCCTTCTGTGCCGGAGTTAACACAATAAGTATCCCACCTGGGGAGTACGGCCGCAAGGTTGAAACTCAAAGGAATTGACGGGGGCCCGCACAAGCAGTGGAGTATGTGGTTTAATTCGAAGCAACGCGAAGAACCTTACCAGGGCTTGACATCCCTCGAAGTTGGTAGAGATACCAACGTCCTTCGGGACGAGGAGACAGGTGGTGCATGGTTGTCGTCAGCTCGTGTCGTGAGATGTTGGGTTAAGTCCCGCAACGAGCGCAACCC	GGATTAGATACCCTGGTAGTCCACGCCGTAAACGATGGATACTAGGTGTAGGAGGTATCGACCCCTTCTGTGCCGGAGTTAACACAATAAGTATCCCACCTGGGGAGTACGGCCGCAAGGTTGAAACTCAAAGGAATTGACGGGGGCCCGCACAAGCAGTGGAGTATGTGGTTTAATTCGAAGCAACGCGAAGAACCTTACCAGGGCTTGACATCCCTCGAAGTTGGTAGAGATACCAACGTCCTTCGGGACGAGGAGACAGGTGGTGCATGGTTGTCGTCAGCTCGTGTCGTGAGATGTTGGGTTAAGTCCCGCAACGAGCGCAACCC	0	0	0	0	0	0	0	0	0	0	0	0	0	0	0	0	0	0	7	3	1	9	20	5	20
Acetobacteroides_1	G	1	0	Aged_2_67553	100	100	N	Acetobacteroides	rdp|S000568144	-	-	-	-	-	Bacteria	Bacteroidetes	Bacteroidia	Bacteroidales	Rikenellaceae	Acetobacteroides	Acetobacteroides	Aged_2_119454;Aged_1_106244;Aged_2_67553	GGCTTAGATACCCTGGTAGTCCACGCCGTAAACGATGATGGCTGGGTGTGCGCCCGCGAGGGCGCGTGCCTGAGGGAAACCATTAAGCCATCCACCTGGGGAGTACGGCCGCAAGGCTGAAACTCAAAGGAATTGACGGGGGCCCGCACAAGCGGAGGAACATGTGGTTTAATTCGATGATACGCGAGGAACCTTACCTGGGCTCGAACGCTTCTGGAATCACGCCGAAAGGCGTGAGCCGGCAACGGCCGGGAGCGAGGTGCTGCATGGTTGTCGTCAGCTCGTGCCGTGAGGTGTCGGGTTAAGTCCCATAACGAGCGCAACCC	GGATTAGATACCCTGGTAGTCCACGCCGTAAACGATGATGGCTGGGTGTGCGCCCGCGAGGGCGCGTGCCTGAGGGAAACCATTAAGCCATCCACCTGGGGAGTACGGCCGCAAGGCTGAAACTCAAAGGAATTGACGGGGGCCCGCACAAGCGGAGGAACATGTGGTTTAATTCGATGATACGCGAGGAACCTTACCTGGGCTCGAACGCTTCTGGAATCACGCCGAAAGGCGTGAGCCGGCAACGGCCGGGAGCGAGGTGCTGCATGGTTGTCGTCAGCTCGTGCCGTGAGGTGTCGGGTTAAGTCCCATAACGAGCGCAACCC	0	0	0	0	0	0	1	0	0	0	1	0.25	1	0	4	2	7	1.75	25	32	26	38	121	30.25	16
Acidibacter_1	O	2	0	Aged_1_50778	100	100	N	Acidibacter	silva|HM362504.1.1458	-	-	-	-	-	Bacteria	Proteobacteria	Gammaproteobacteria	Acidibacter	Acidibacter	Acidibacter	Acidibacter	Aged_2_99204;Aged_1_50778;Aged_1_96491;Aged_1_114738;Aged_1_1241	GGATTAGATACCCTGGTAGTCCACGCCATAAACGATGAGGACTAGACGTTGAGAGGGTAAGCCTCCCAGTGTCGCAGCTAACGCGATAAGTCCTCCGCCTGGGGAGTACGGCCGCAAGGTTGAAACTCAAAGGAATTGACGGGGACCCGCACAAGCGGTGGAGCATGTGGTTTAATTCGATGCAACGCGAAGAACCTTACCTGGCCTTGACATCCCAGGAACCCTGCAGAGATGCGGGGGTGCCGCAAGGAACCTGGAGACAGGTGCTGCATGGCTGTCGTCAGCTCGTGTCGTGAGATGTTGGGTTAAGTCCCGCAACGAGCGCAACCC	GGATTAGATACCCTGGTAGTCCACGCCATAAACGATGAGGACTAGACGTTGAGAGGGTAAGCCTCCCAGTGTCGCAGCTAACGCGATAAGTCCTCCGCCTGGGGAGTACGGCCGCAAGGTTGAAACTCAAAGGAATTGACGGGGACCCGCACAAGCGGTGGAGCATGTGGTTTAATTCGATGCAACGCGAAGAACCTTACCTGGCCTTGACATCCCAGGAACCCTGCAGAGATGCGGGGGTGCCGCAAGGAACCTGGAGACAGGTGCTGCATGGCTGTCGTCAGCTCGTGTCGTGAGATGTTGGGTTAAGTCCCGCAACGAGCGCAACCC	105	13	39	109	266	66.5	7	1	0	6	14	3.5	1	1	0	2	4	1	1	0	1	0	2	0.5	0
Acidimicrobiaceae_MG_1	G	1	3	Compost_1_33367	100	100	N	Acidimicrobium;Aciditerrimonas;Ferrimicrobium	nt|JX505113.1;nt|JX505325.1;rdp|S000840472	-	-	-	-	-	Bacteria	Actinobacteria	Acidimicrobiia	Acidimicrobiales	Acidimicrobiaceae	Acidimicrobiaceae_MG	Acidimicrobiaceae_MG	Compost_1_17302;Compost_1_115962;Compost_1_33367;Compost_1_40292	GGCTTAGATACCCTGGTAGTCCACGCCGTAAACGTTGGGCACTAGGTGTGGGGATCTATCGACGGTTTCCGTGCCGAAGCTAACGCATTAAGTGCCCCGCCTGGGGAGTACGGCCGCAAGGCTAAAACTCAAAGGAATTGACGGGGGCCCGCACAAGCGGCGGAGCATGTGGCTTAATTCGATGCAACGCGAAGAACCTTACCAAGGCTTGACATTCTGGGTAATCCGTGGAAACACGGTGATCCTTCGGGATCCAGAACAGGTGGTGCATGGCTGTCGTCAGCTCGTGTCGTGAGATGTTGGGTTAAGTCCCGCAACGAGCGCAACCC	GGATTAGATACCCTGGTAGTCCACGCCGTAAACGTTGGGCACTAGGTGTGGGGATCTATCGACGGTTTCCGTGCCGAAGCTAACGCATTAAGTGCCCCGCCTGGGGAGTACGGCCGCAAGGCTAAAACTCAAAGGAATTGACGGGGGCCCGCACAAGCGGCGGAGCATGTGGCTTAATTCGATGCAACGCGAAGAACCTTACCAAGGCTTGACATTCTGGGTAATCCGTGGAAACACGGTGATCCTTCGGGATCCAGAACAGGTGGTGCATGGCTGTCGTCAGCTCGTGTCGTGAGATGTTGGGTTAAGTCCCGCAACGAGCGCAACCC	2	0	0	0	2	0.5	2	1	1	0	4	1	1	1	0	1	3	0.75	27	6	5	15	53	13.25	118
Acidimicrobiales_MF_1	F	2	2	Aged_3_125056	100	100	N	Acidimicrobineae;Iamiaceae	rdp|S000931595;rdp|S000931748	-	-	-	-	-	Bacteria	Actinobacteria	Acidimicrobiia	Acidimicrobiales	Acidimicrobiales_MF	Acidimicrobiales_MF	Acidimicrobiales_MF	Aged_3_125056;Aged_1_64887;Aged_1_144997;Compost_1_53502	GGATTAGATACCCTGGTAGTCCACGCCGTAAACGTTGGGTACTAGGTGTGGGGCCTTATCAACGGGCTCTGTGCCGAAGCTAACGCATTAAGTACCCCGCCTGGGGAGTACGGCCGCAAGGCTAAAACTCAAAGGAATTGACGGGGGCCCGCACAAGCGGCGGAGCATGTTGCTTAATTCGAGGCAACGCGAAGAACCTTACCTGGGCTTGACATGTAGGGAAAAGCCATAGAGATATGGTGTCCTTCGGGGTCCTACACAGGTGGTGCATGGCTGTCGTCAGCTCGTGTCGTGAGATGTTGGGTTAAGTCCCGCAACGAGCGCAACCC	GGATTAGATACCCTGGTAGTCCACGCCGTAAACGTTGGGTACTAGGTGTGGGGCCTTATCAACGGGCTCTGTGCCGAAGCTAACGCATTAAGTACCCCGCCTGGGGAGTACGGCCGCAAGGCTAAAACTCAAAGGAATTGACGGGGGCCCGCACAAGCGGCGGAGCATGTTGCTTAATTCGAGGCAACGCGAAGAACCTTACCTGGGCTTGACATGTAGGGAAAAGCCATAGAGATATGGTGTCCTTCGGGGTCCTACACAGGTGGTGCATGGCTGTCGTCAGCTCGTGTCGTGAGATGTTGGGTTAAGTCCCGCAACGAGCGCAACCC	0	0	0	0	0	0	0	0	0	0	0	0	0	0	0	0	0	0	0	0	2	0	2	0.5	26
Acidimicrobiales_MG_2	G	1	2	Aged_1_112249	99.088	100	N	Aciditerrimonas;Iamia	rdp|S004526454;silva|KP281027.1.735	-	-	-	-	-	Bacteria	Actinobacteria	Acidimicrobiia	Acidimicrobiales	Acidimicrobiales_MG	Acidimicrobiales_MG	Acidimicrobiales_MG	Aged_1_117970;Aged_1_106418;Aged_1_112249;Aged_1_120417;Aged_1_28687;Aged_1_121792;Aged_1_115020;Aged_1_107599	GGATTAGATACCCTGGTAGTCCACGCCGTAAACGTTGGGCACTAGGTGTGGGTCCTTACCAACGGGATCCGTGCCGAAGCTAACGCATTAAGTGCCCCGCCTGGGGAGTACGGCCGCAAGGCTAAAACTCAAAGGAATTGACGGGGGCCCGCACAAGCGGCGGAGCATGTTGCTTAATTCGATGCAACGCGAAGAACCTTACCTGGGCTTGACATGTAGGGAAAAGCCGTAGAGATACGGTGTCCTTCGGGGCCCTACACAGGTGGTGCATGGCTGTCGTCAGCTCGTGTCGTGAGATGTTGGGTTAAGTCCCGCAACGAGCGCAACCC	GGATTAGATACCCTGGTAGTCCACGCCGTAAACGTTGGGCACTAGGTGTGGGTCCTTACCAACGGGATCCGTGCCGTAGCTAACGCATTAAGTGCCCCGCCTGGGGAGTACGGCCGCAAGGCTAAAACTCAAAGGAATTGACGGGGGCCCGCACAAGCGGCGGAGCATGTTGCTTAATTCGAGGCGACGCGAAGAACCTTACCTGGGCTTGACATGTAGGGAAAAGCCGTAGAGATACGGTGTCCTTCGGGGCCCTACACAGGTGGTGCATGGCTGTCGTCAGCTCGTGTCGTGAGATGTTGGGTTAAGTCCCGCAACGAGCGCAACCC	0	0	0	0	0	0	0	0	0	0	0	0	0	0	0	0	0	0	5	6	25	5	41	10.25	58
Acidimicrobiia_MF_1	F	1	2	Aged_2_128186	100	100	N	Acidimicrobineae;Ilumatobacteraceae	rdp|S002424467;silva|HQ214814.1.621	-	-	-	-	-	Bacteria	Actinobacteria	Acidimicrobiia	Acidimicrobiia_MF	Acidimicrobiia_MF	Acidimicrobiia_MF	Acidimicrobiia_MF	Aged_2_128186;Aged_1_79755;Aged_1_94072	GGATTAGATACCCTGGTAGTCCACGCCGTAAACGTTGGGCACTAGGTGTGGGCTCCAACCAACGGAGTCCGTGCCGTCGCTAACGCATTAAGTGCCCCGCCTGGGGAGTACGGCCGCAAGGCTAAAACTCAAAGGAATTGACGGGGCCCCGCACAAGCAGCGGAGCGTGTTGCTTAATTCGATGCGACGCGAAGAACCTTACCTGGGCTTGACATGCAGGGAAAAGCCGTAGAGATACGGTGTCCTTCGGGGCCTTGCACAGGTGGTGCATGGCTGTCGTCAGCTCGTGTCGTGAGATGTTGGGTTAAGTCCCGCAACGAGCGCAACCC	GGATTAGATACCCTGGTAGTCCACGCCGTAAACGTTGGGCACTAGGTGTGGGCTCCAACCAACGGAGTCCGTGCCGTCGCTAACGCATTAAGTGCCCCGCCTGGGGAGTACGGCCGCAAGGCTAAAACTCAAAGGAATTGACGGGGCCCCGCACAAGCAGCGGAGCGTGTTGCTTAATTCGATGCGACGCGAAGAACCTTACCTGGGCTTGACATGCAGGGAAAAGCCGTAGAGATACGGTGTCCTTCGGGGCCTTGCACAGGTGGTGCATGGCTGTCGTCAGCTCGTGTCGTGAGATGTTGGGTTAAGTCCCGCAACGAGCGCAACCC	0	0	0	0	0	0	3	0	0	1	4	1	6	4	12	12	34	8.5	19	79	64	119	281	70.25	19
Acidimicrobiia_MF_2	F	1	2	Aged_1_102328	99.088	100	N	Acidimicrobineae;Microtrichaceae	rdp|S003208758;silva|JN596601.1.1409	-	-	-	-	-	Bacteria	Actinobacteria	Acidimicrobiia	Acidimicrobiia_MF	Acidimicrobiia_MF	Acidimicrobiia_MF	Acidimicrobiia_MF	Aged_1_126236;Aged_1_19778;Aged_1_102328;Aged_1_129055;Aged_1_30476;Aged_1_122394;Aged_1_142967;Aged_1_134897	GGATTAGATACCCTGGTAGTCCATGCCGTAAACGTTGGGCACTAGGTGTGGGACCTTATCAACGGGTTCCGTGCCGTCGCTAACGCATTAAGTGCCCCGCCTGGGGAGTACGGCCGCAAGGCTAAAACTCAAAGGAATTGACGGGGGCCCGCACAAGCGGCGGAGCATGTTGCTTAATTCGAGGCAACGCGAAGAACCTTACCTGGGCTTGACATGTAGGGAAAAGCCATAGAGATATGGTGTCCTTCGGGGCCCTACACAGGTGGTGCATGGCTGTCGTCAGCTCGTGTCGTGAGATGTTGGGTTAAGTCCCGCAACGAGCGCAACCC	GGATTAGATACCCTGGTAGTCCATGCCGTAAACGTTGGGCACTAGGTGTGGGGCCTTATCAACGGGTTCCGTGCCGTAGCTAACGCATTAAGTGCCCCGCCTGGGGAGTACGGCCGCAAGGCTAAAACTCAAAGGAATTGACGGGGGCCCGCACAAGCGGCGGAGCATGTTGCTTAATTCGAGGCAACGCGAAGAACCTTACCTGGGTTTGACATGTAGGGAAAAGCCATAGAGATATGGTGTCCTTCGGGGCCCTACACAGGTGGTGCATGGCTGTCGTCAGCTCGTGTCGTGAGATGTTGGGTTAAGTCCCGCAACGAGCGCAACCC	0	0	0	0	0	0	0	0	0	0	0	0	1	1	4	2	8	2	74	81	93	74	322	80.5	57
Acidimicrobiia_MF_3	F	1	2	Aged_1_69811	100	100	N	Acidimicrobineae;Microtrichaceae	rdp|S003537028;silva|JQ427076.1.1475	-	-	-	-	-	Bacteria	Actinobacteria	Acidimicrobiia	Acidimicrobiia_MF	Acidimicrobiia_MF	Acidimicrobiia_MF	Acidimicrobiia_MF	Aged_1_55327;Aged_1_69811;Aged_1_75407	GGATTAGATACCCTGGTAGTCCACGCCGTAAACGTTGGGCACTAGGTGTGGGGAGGAATCAACCCTTTCCGTGCCGTAGCTAACGCATTAAGTGCCCCGCCTGGGGAGTACGGCCGCAAGGCTAAAACTCAAAGGAATTGACGGGGGCCCGCACAAGCGGCGGAGCATGTTGCTTAATTCGAGGCAACGCGAAGAACCTTACCTGGGTTTGACATGCAGCGAAAAGCCGTAGAGATACGGTGTCCTTCGGGGCGCTGCACAGGTGGTGCATGGTTGTCGTCAGCTCGTGTCGTGAGATGTTGGGTTAAGTCCCGCAACGAGCGCAACCC	GGATTAGATACCCTGGTAGTCCACGCCGTAAACGTTGGGCACTAGGTGTGGGGAGGAATCAACCCTTTCCGTGCCGTAGCTAACGCATTAAGTGCCCCGCCTGGGGAGTACGGCCGCAAGGCTAAAACTCAAAGGAATTGACGGGGGCCCGCACAAGCGGCGGAGCATGTTGCTTAATTCGAGGCAACGCGAAGAACCTTACCTGGGTTTGACATGCAGCGAAAAGCCGTAGAGATACGGTGTCCTTCGGGGCGCTGCACAGGTGGTGCATGGTTGTCGTCAGCTCGTGTCGTGAGATGTTGGGTTAAGTCCCGCAACGAGCGCAACCC	0	0	0	0	0	0	0	0	0	0	0	0	0	0	0	0	0	0	7	35	16	62	120	30	3
Acidimicrobiia_MF_4	F	1	2	Aged_1_10153	99.693	99.0881	N	Acidimicrobineae;Microtrichaceae	rdp|S004390559;silva|KM341216.1.542	-	-	-	-	-	Bacteria	Actinobacteria	Acidimicrobiia	Acidimicrobiia_MF	Acidimicrobiia_MF	Acidimicrobiia_MF	Acidimicrobiia_MF	Aged_1_107419;Aged_1_119649;Aged_1_10153;Aged_1_119506;Aged_1_103517;Aged_1_137945;Aged_1_123877;Aged_1_154826	GGATTAGATACCCTGGTAGTCCACGCCGTAAACGTTGGGCACTAGGTGTGGGACTCACTCAACGGGTTCCGTGCCGAAGCTAACGCATTAAGTGCCCCGCCTGGGGAGTACGGCCGCAAGGCTAAAACTCAAAGGAATTGACGGGGGCCCGCACAAGCGGCGGAGCATGTTGCTTAATTCGAGGCAACGCGAAGAACCTTACCTGGGCTTGACATGTAGGGAAAAGCCATAGAGATATGGTGTCCTTCGGGGCCCTACACAGGTGGTGCATGGCTGTCGTCAGCTCGTGTCGTGAGATGTTGGGTTAAGTCCCGCAACGAGCGCAACCC	TAGATACCCTGGTAGTCCACGCCGTAAACGTTGGGCACTAGGTGTGGGACTCACTCAACGGGTTCCGTGCCGAAGCTAACGCATTAAGTGCCCCGCCTGGGGAGTACGGCCGCAAGGCTAAAACTCAAAGGAATTGACGGGGGCCCGCACAAGCGGCGGAGCATGTTGCTTAATTCGAGGCAACGCGAAGAACCTTACCTGGGCTTGACATGTAGGGAAAAGCCATAGAGATATGGTGTCCTTCGGGGCCCGTACACAGGTGGTGCATGGCTGTCGTCAGCTCGTGTCGTGAGATGTTGGGTTAAGTCCCGCAACGAGCGCAACCC	0	0	0	0	0	0	0	0	1	0	1	0.25	0	2	0	3	5	1.25	15	46	24	38	123	30.75	19
Acidimicrobiia_MF_5	F	1	2	Aged_1_138327	99.392	100	N	Acidimicrobineae;Microtrichaceae	rdp|S004435377;silva|KF428036.1.1486	-	-	-	-	-	Bacteria	Actinobacteria	Acidimicrobiia	Acidimicrobiia_MF	Acidimicrobiia_MF	Acidimicrobiia_MF	Acidimicrobiia_MF	Aged_1_116724;Aged_1_138327;Aged_1_129981;Aged_1_62582	GGATTAGATACCCTGGTAGTCCACGCCGTAAACGTTGGGCACTAGGTGTGGGGAGGAGTCAACCCTTTCCGTGCCGTAGCTAACGCATTAAGTGCCCCGCCTGGGGAGTACGGCCGCAAGGCTAAAACTCAAAGGAATTGACGGGGGCCCGCACAAGCGGCGGAGCATGTTGCTTAATTCGAGGCAACGCGAAGAACCTTACCTAGGTTGAACTATGCAGGAAAAGCCACAGAGATGTGGTGTCCTTCGGGGCCTGCGATAGGTGGTGCATGGCTGTCGTCAGCTCGTGTCGTGAGATGTTGGGTTAAGTCCCGCAACGAGCGCGACCC	GGATTAGATACCCAAGTAGTCCACGCCGTAAACGTTGGGCACTAGGTGTGGGGAGGANTCAACCCTTTCCGTGCCGTAGCTAACGCATTAAGTGCCCCGCCTGGGGAGTACGGCCGCAAGGCTAAAACTCAAAGGAATTGACGGGGGCCCGCACTAGCGGCGGAGCATGTTGCTTAATTCGAGGCAACGCGAAGAACCTTACCTAGGTTGAACTATGCAGGAAAAGCCACAGAGATGTGGTGTCCTTCGGGGCCTGCGATAGGTGGTGCATGGCTGTCGTCAGCTCGTGTCGTGAGATGTTGGGTTAAGTCCCGAAACGAGCGAAACCC	0	0	0	0	0	0	17	0	4	4	25	6.25	6	1	13	6	26	6.5	62	43	33	131	269	67.25	26
Acidimicrobineae_1	F	1	0	Aged_1_88258	100	100	N	Acidimicrobineae	rdp|S000878872	-	-	-	-	-	Bacteria	Actinobacteria	Acidimicrobiia	Acidimicrobiales	Acidimicrobineae	Acidimicrobineae	Acidimicrobineae	Aged_1_88258;Aged_3_150257	GGATTAGATACCCTGGTAGTCCACGCCGTAAACGTTGGGCACTAGGTGTGGGTCTCAACCAACGAGATCCGTGCCGTAGCTAACGCACTAAGTGCCCCGCCTGGGGAGTACGGCCGCAAGGCTAAAACTCAAAGGAATTGACGGGGGCCCGCACAAGCGGCGGAGCATGTTGCTTAATTCGAGGCAACGCGAAGAACCTTACCTGGGTTTGACATGTAGGGAAAAGCCGTAGAGATACGGTGTCCTTCGGGGCCCTACACAGGTGGTGCATGGCTGTCGTCAGCTCGTGTCGTGAGATGTTGGGTTAAGTCCCGCAACGAGCGCAACCC	GGATTAGATACCCTGGTAGTCCACGCCGTAAACGTTGGGCACTAGGTGTGGGTCTCAACCAACGAGATCCGTGCCGTAGCTAACGCACTAAGTGCCCCGCCTGGGGAGTACGGCCGCAAGGCTAAAACTCAAAGGAATTGACGGGGGCCCGCACAAGCGGCGGAGCATGTTGCTTAATTCGAGGCAACGCGAAGAACCTTACCTGGGTTTGACATGTAGGGAAAAGCCGTAGAGATACGGTGTCCTTCGGGGCCCTACACAGGTGGTGCATGGCTGTCGTCAGCTCGTGTCGTGAGATGTTGGGTTAAGTCCCGCAACGAGCGCAACCC	10	1	1	100	112	28	0	0	0	0	0	0	0	0	0	0	0	0	0	0	0	0	0	0	0
Acidimicrobineae_2	F	1	0	Aged_1_105326	100	100	N	Acidimicrobineae	rdp|S001254374	-	-	-	-	-	Bacteria	Actinobacteria	Acidimicrobiia	Acidimicrobiales	Acidimicrobineae	Acidimicrobineae	Acidimicrobineae	Aged_1_149343;Aged_1_105326;Aged_1_137097;Aged_1_126313;Aged_1_132546;Aged_1_159310	GGATTAGATACCCTGGTAGTCCACGCTGTAAACGTTGGACACTAGGTGTGGCGGTCCGATCAACGACTGCCGTGCCGAAGCTAACGCATTAAGTGTCCCGCCTGGGGAGTACGGCCGCAAGGCTAAAACTCAAAGGAATTGACGGGTCCCCGCACAAGCGGCGGAGCATGCGGCTTAATTCGATGCAACCCGAAGAACCTTACCTGGGTTTGACATCATGGGAAAAGCCGTGGAAACACGGTGTCCGTAAGGGCCCATGACAGGTGGTGCATGGCTGTCGTCAGCTCGTGTCGTGAGATGTTGGGTTAAGTCCCGCAACGAGCGCAACCC	GGATTAGATACCCTGGTAGTCCACGCTGTAAACGTTGGACACTAGGTGTGGCGGTCCGATCAACGACTGCCGTGCCGAAGCTAACGCATTAAGTGTCCCGCCTGGGGAGTACGGCCGCAAGGCTAAAACTCAAAGGAATTGACGGGTCCCCGCACAAGCGGCGGAGCATGCGGCTTAATTCGATGCAACCCGAAGAACCTTACCTGGGTTTGACATCATGGGAAAAGCCGTGGAAACACGGTGTCCGTAAGGGCCCATGACAGGTGGTGCATGGCTGTCGTCAGCTCGTGTCGTGAGATGTTGGGTTAAGTCCCGCAACGAGCGCAACCC	686	2023	195	1195	4099	1024.75	7	1	3	0	11	2.75	0	0	0	0	0	0	0	0	0	0	0	0	0
Acidimicrobineae_3	F	1	0	Aged_1_123728	99.697	100	Y	Acidimicrobineae	rdp|S001565985	-	-	-	-	-	Bacteria	Actinobacteria	Acidimicrobiia	Acidimicrobiales	Acidimicrobineae	Acidimicrobineae	Acidimicrobineae	Aged_1_123728	GGATTAGATACCCTGGTAGTCCACGCCGTAAACGTTGGGTACTAGGTGTGGCGTCCCGATCAACGGATGCCGTGCCGAAGCTAACGCATTAAGTACCCCGCCTGGGGAGTACGGCCGCAAGGCTAAAACTCAAAGGAATTGACGGGTCCCCGCACAAGCGGCGGAGCATGCGGCTTAATTCGATGCAACCCGAAGAACCTTACCTGGGCTTGACATCATGGGAAAAGCCGTAGAAATACGGTGTCCGAAAGGGCCCATGACAGGTGGTGCATGGCTGTCGTCAGCTCGTGTCGTGAGATGTTGGGTTAAGTCCCGCAACGAGCGCAACCC	GGATTAGATACCCTGGTAGTCCACGCCGTAAACGTTGGGTACTAGGTGTGGCGTCCCGATCAACGGATGCCGTGCCGAAGCTAACGCATTAAGTACCCCGCCTGGGGAGTACGGCCGCAAGGCTAAAACTCAAAGGAATTGACGGGTCCCCGCACAAGCGGCGGAGCATGCGGCTTAATTCGATGCAACCCGAAGAACCTTACCTGGGCTTGACATCATGGGAAAAGCCGTAGAAATACGGTGTCCGTAAGGGCCCATGACAGGTGGTGCATGGCTGTCGTCAGCTCGTGTCGTGAGATGTTGGGTTAAGTCCCGCAACGAGCGCAACCC	0	0	0	0	0	0	0	0	0	0	0	0	0	0	0	0	0	0	0	0	0	0	0	0	30
Acidimicrobineae_4	F	4	0	Aged_1_10826	100	100	N	Acidimicrobineae	rdp|S002161669	-	-	-	-	-	Bacteria	Actinobacteria	Acidimicrobiia	Acidimicrobiales	Acidimicrobineae	Acidimicrobineae	Acidimicrobineae	Aged_3_108617;Compost_1_191754;Aged_3_52891;Aged_1_100559;Aged_1_11518;Aged_1_10826;Aged_1_124253;Aged_4_73075;Compost_4_54353;Aged_2_46755;Aged_4_118500;Aged_1_139588;Aged_1_125866;Aged_1_101182;Aged_1_111811;Aged_4_60533;Aged_3_121871	GGATTAGATACCCTGGTAGTCCACGCCGTAAACGTTGGGCACTAGGTGTGGGGACTTTCCAACGGTCTCCGTGCCGAAGCTAACGCATTAAGTGCCCCGCCTGGGGAGTACGGCCGCAAGGCTAAAACTCAAAGGAATTGACGGGGGCCCGCACAAGCGGCGGAGCATGTTGCTTAATTCGAGGCAACGCGAAGAACCTTACCTGGGCTTGACATGCAGGGAAAAGCCGTAGAGATACGGTGTCCTTCGGGGCCCTGCACAGGTGGTGCATGGCTGTCGTCAGCTCGTGTCGTGAGATGTTGGGTTAAGTCCCGCAACGAGCGCAACCC	GGATTAGATACCCTGGTAGTCCACGCCGTAAACGTTGGGCACTAGGTGTGGGGACTTTCCAACGGTCTCCGTGCCGAAGCTAACGCATTAAGTGCCCCGCCTGGGGAGTACGGCCGCAAGGCTAAAACTCAAAGGAATTGACGGGGGCCCGCACAAGCGGCGGAGCATGTTGCTTAATTCGAGGCAACGCGAAGAACCTTACCTGGGCTTGACATGCAGGGAAAAGCCGTAGAGATACGGTGTCCTTCGGGGCCCTGCACAGGTGGTGCATGGCTGTCGTCAGCTCGTGTCGTGAGATGTTGGGTTAAGTCCCGCAACGAGCGCAACCC	0	0	0	0	0	0	0	0	0	0	0	0	0	0	0	0	0	0	0	2	0	1	3	0.75	0
Acidimicrobineae_5	F	1	0	Aged_4_75321	100	100	N	Acidimicrobineae	rdp|S002970295	-	-	-	-	-	Bacteria	Actinobacteria	Acidimicrobiia	Acidimicrobiales	Acidimicrobineae	Acidimicrobineae	Acidimicrobineae	Aged_3_78359;Compost_1_138650;Aged_4_130164;Aged_4_75321;Compost_1_190545;Compost_1_190567	GGATTAGATACCCTGGTAGTCCACGCCGTAAACGTTGGGCACTAGGTGTGGGACCTTATCAACGGGTTCCGTGCCGTAGCTAACGCATTAAGTGCCCCGCCTGGGGAGTACGGCCGCAAGGCTAAAACTCAAAGGAATTGACGGGGGCCCGCACAAGCGGCGGAGCATGTTGCTTAATTCGAGGCAACGCGAAGAACCTTACCTAGGCTTGACATGTAGGGAAAAGCCGTAGAGATACGGTGTCCTTCGGGGCCCTACACAGGTGGTGCATGGCTGTCGTCAGCTCGTGTCGTGAGATGTTGGGTTAAGTCCCGCAACGAGCGCGACCC	GGATTAGATACCCTGGTAGTCCACGCCGTAAACGTTGGGCACTAGGTGTGGGACCTTATCAACGGGTTCCGTGCCGTAGCTAACGCATTAAGTGCCCCGCCTGGGGAGTACGGCCGCAAGGCTAAAACTCAAAGGAATTGACGGGGGCCCGCACAAGCGGCGGAGCATGTTGCTTAATTCGAGGCAACGCGAAGAACCTTACCTAGGCTTGACATGTAGGGAAAAGCCGTAGAGATACGGTGTCCTTCGGGGCCCTACACAGGTGGTGCATGGCTGTCGTCAGCTCGTGTCGTGAGATGTTGGGTTAAGTCCCGCAACGAGCGCAACCC	0	0	0	0	0	0	2	0	0	0	2	0.5	0	1	0	1	2	0.5	16	4	19	23	62	15.5	30
Acidimicrobineae_6	F	1	0	Aged_1_107068	100	100	N	Acidimicrobineae	rdp|S004421866	-	-	-	-	-	Bacteria	Actinobacteria	Acidimicrobiia	Acidimicrobiales	Acidimicrobineae	Acidimicrobineae	Acidimicrobineae	Aged_1_107068;Aged_1_123519;Aged_1_107828	GGATTAGATACCCTGGTAGTCCACGCCGTAAACGTTGGGTACTAGGTGTGGCGTCCCGATCAACGGATGCCGTGCCGAAGCTAACGCATTAAGTACCCCGCCTGGGGAGTACGGCCGCAAGGCTAAAACTCAAAGGAATTGACGGGTCCCCGCACAAGCGGCGGAGCATGCGGCTTAATTCGATGCAACCCGAAGAACCTTACCTGGGCTTGACATCACGGGAAAAGCCGTAGAAATACGGTGTCCATTAGGGCCCGTGACAGGTGGTGCATGGCTGTCGTCAGCTCGTGTCGTGAGATGTTGGGTTAAGTCCCGCAACGAGCGCAACCC	GGATTAGATACCCTGGTAGTCCACGCCGTAAACGTTGGGTACTAGGTGTGGCGTCCCGATCAACGGATGCCGTGCCGAAGCTAACGCATTAAGTACCCCGCCTGGGGAGTACGGCCGCAAGGCTAAAACTCAAAGGAATTGACGGGTCCCCGCACAAGCGGCGGAGCATGCGGCTTAATTCGATGCAACCCGAAGAACCTTACCTGGGCTTGACATCACGGGAAAAGCCGTAGAAATACGGTGTCCATTAGGGCCCGTGACAGGTGGTGCATGGCTGTCGTCAGCTCGTGTCGTGAGATGTTGGGTTAAGTCCCGCAACGAGCGCAACCC	0	0	0	0	0	0	0	0	0	0	0	0	1	5	0	219	225	56.25	0	0	1	2	3	0.75	1
Aciditerrimonas_1	G	1	0	Aged_1_138757	99.696	100	N	Aciditerrimonas	rdp|S000854402	-	-	-	-	-	Bacteria	Actinobacteria	Acidimicrobiia	Acidimicrobiales	Acidimicrobiaceae	Aciditerrimonas	Aciditerrimonas	Aged_1_146074;Aged_1_138757;Aged_1_47913;Aged_1_147630;Aged_1_26884	GGATTAGATACCCTGGTAGTCCACGCCGTAAACGTTGGGCACTAGGTGTGGGGTTCGATCGACGGGCTCCGTGCCGTAGCTAACGCATTAAGTGCCCCGCCTGGGAAGTACGGCCGCAAGGCTAAAACTCAAAGGAATTGACGGGGGCCCGCACAAGCGGCGGAGCATGTTGCTTAATTCGATGCAACGCGAAGAACCTTACCAAGGCTTGACATGTAGGGAAAAGCCGTAGAGATACGGTGTCCTTCGGGGCCCTACACAGGTGGTGCATGGCTGTCGTCAGCTCGTGTCGTGAGATGTTGGGTTAAGTCCCGCAACGAGCGCAACCC	GGATTAGATACCCTGGTAGTCCACGCCGTAAACGTTGGGCACTAGGTGTGGGGCTCGATCGACGGGCTCCGTGCCGTAGCTAACGCATTAAGTGCCCCGCCTGGGAAGTACGGCCGCAAGGCTAAAACTCAAAGGAATTGACGGGGGCCCGCACAAGCGGCGGAGCATGTTGCTTAATTCGATGCAACGCGAAGAACCTTACCAAGGCTTGACATGTAGGGAAAAGCCGTAGAGATACGGTGTCCTTCGGGGCCCTACACAGGTGGTGCATGGCTGTCGTCAGCTCGTGTCGTGAGATGTTGGGTTAAGTCCCGCAACGAGCGCAACCC	0	0	0	0	0	0	0	0	0	0	0	0	0	1	4	72	77	19.25	1	0	5	1	7	1.75	1
Aciditerrimonas_10	G	1	0	Aged_1_1146	100	100	N	Aciditerrimonas	rdp|S003601081	-	-	-	-	-	Bacteria	Actinobacteria	Acidimicrobiia	Acidimicrobiales	Acidimicrobiaceae	Aciditerrimonas	Aciditerrimonas	Aged_1_58156;Aged_2_72850;Aged_1_1146;Aged_1_141698	GGCTTAGATACCCTGGTAGTCCACGCCGTAAACGTTGGGCACTAGGTGTGGGACTCTATCGACGGGTTCCGTGCCGTAGCTAACGCATTAAGTGCCCCGCCTGGGGAGTACGGCCGCAAGGCTAAAACTCAAAGGAATTGACGGGGGCCCGCACAAGCGGCGGAGCGTGTGGCTTAATTCGATGCAACGCGAAGAACCTTACCTGGGCTTGACATTTTCGGTAAAGCGGGTGAAAGCCCGTGTGCTTCGGCGCCGAAAACAGGTGGTGCATGGCTGTCGTCAGCTCGTGTCGTGAGATGTTGGGTTAAGTCCCGCAACGAGCGCAACCC	GGATTAGATACCCTGGTAGTCCACGCCGTAAACGTTGGGCACTAGGTGTGGGACTCTATCGACGGGTTCCGTGCCGTAGCTAACGCATTAAGTGCCCCGCCTGGGGAGTACGGCCGCAAGGCTAAAACTCAAAGGAATTGACGGGGGCCCGCACAAGCGGCGGAGCGTGTGGCTTAATTCGATGCAACGCGAAGAACCTTACCTGGGCTTGACATTTTCGGTAAAGCGGGTGAAAGCCCGTGTGCTTCGGCGCCGAAAACAGGTGGTGCATGGCTGTCGTCAGCTCGTGTCGTGAGATGTTGGGTTAAGTCCCGCAACGAGCGCAACCC	0	0	0	0	0	0	7	35	49	106	197	49.25	28	29	32	342	431	107.75	12	12	10	38	72	18	10
Aciditerrimonas_11	G	1	0	Aged_1_100945	99.696	100	N	Aciditerrimonas	rdp|S003660422	-	-	-	-	-	Bacteria	Actinobacteria	Acidimicrobiia	Acidimicrobiales	Acidimicrobiaceae	Aciditerrimonas	Aciditerrimonas	Aged_1_129093;Aged_1_109047;Aged_1_100945;Aged_1_100491;Aged_1_122921;Aged_1_110128;Aged_1_102467;Aged_1_124550	GGATTAGATACCCTGGTAGTCCACGCCGTAAACGTTGGGCACTAGGTGTGGGGCTCTATCGACGGGTTCCGTGCCGTAGCTAACGCATTAAGTGCCCCGCCTGGGGAGTACGGCCGCAAGGCTAAAACTCAAAGGAATTGACGGGGGCCCGCACAAGCGGCGGAGCATGTGGCTTAATTCGATGCAACGCGAAGAACCTTACCTGGGCTGAACTATGTGGGAAAAGCCGTAGAGATACGGTGTCCTTCGGGGCCCACGATAGGTGGTGCATGGCTGTCGTCAGCTCGTGTCGTGAGATGTTGGGTTAAGTCCCGCAACGAGCGCAACCC	GGATTAGATACCCTGGTAGTCCACGCCGTAAACGTTGGGCACTAGGTGTGGGGCTCTATCGACGGGTTCCGTGCCGTAGCTAACGCATTAAGTGCCCCGCCTGGGGAGTACGGCCGCAAGGCTAAAACTCAAAGGAATTGACGGGGGCCCGCACAAGCGGCGGAGCATGTGGCTTAATTCGATGCAACGCGAAGAACCTTACCTGGGTTGAACTATGTGGGAAAAGCCGTAGAGATACGGTGTCCTTCGGGGCCCACGATAGGTGGTGCATGGCTGTCGTCAGCTCGTGTCGTGAGATGTTGGGTTAAGTCCCGCAACGAGCGCAACCC	0	0	0	0	0	0	14	20	33	29	96	24	32	17	44	103	196	49	4	6	15	18	43	10.75	13
Aciditerrimonas_12	G	1	0	Aged_1_23287	99.394	100	N	Aciditerrimonas	rdp|S004419500	-	-	-	-	-	Bacteria	Actinobacteria	Acidimicrobiia	Acidimicrobiales	Acidimicrobiaceae	Aciditerrimonas	Aciditerrimonas	Aged_3_90071;Aged_2_101700;Aged_1_23287;Aged_1_142506;Aged_1_138289;Aged_1_102374	GGATTAGATACCCTGGTAGTCCACGCCGTAAACGGTGGGCACTAGGTGTGGGTCCTTACCAACGGGATCCGTGCCGTAGCTAACGCATTAAGTGCCCCGCCTGGGGAGTACGGCCGCAAGGCTAAAACTCAAAGGAATTGACGGGGGCCCGCACAAGCGGCGGAGCATGTTGCTTAATTCGAGGCAACGCGAAGAACCTTACCTGGGCTTGACATGCAGGGAAAAGCCGTGGAGACACGGTGTCCTTCGGGGCCCTGCACAGGTGGTGCATGGCTGTCGTCAGCTCGTGTCGTGAGATGTTGGGTTAAGTCCCGCAACGAGCGCAACCC	GGATTAGATACCCTGGGTAGTCCACGCTGTAAACGGTGGGCACTAGGTGTGGGTCCTTACCAACGGGATCCGTGCCGTAGCTAACGCATTAAGTGCCCCGCCTGGGGAGTACGGCCGCAAGGCTAAAACTCAAAGGAATTGACGGGGGCCCGCACAAGCGGCGGAGCATGTTGCTTAATTCGAGGCAACGCGAAGAACCTTACCTGGGCTTGACATGCAGGGAAAAGCCGTGGAGACACGGTGTCCTTCGGGGCCCTGCACAGGTGGTGCATGGCTGTCGTCAGCTCGTGTCGTGAGATGTTGGGTTAAGTCCCGCAACGAGCGCAACCC	0	0	0	0	0	0	0	7	17	6	30	7.5	6	2	1	60	69	17.25	1	3	1	2	7	1.75	1
Aciditerrimonas_13	G	1	0	Aged_4_107088	100	100	N	Aciditerrimonas	rdp|S004425208	-	-	-	-	-	Bacteria	Actinobacteria	Acidimicrobiia	Acidimicrobiales	Acidimicrobiaceae	Aciditerrimonas	Aciditerrimonas	Aged_4_107088	GGCTTAGATACCCTGGTAGTCCACGCCGTAAACGTTGGGCACTAGGTGTGGGGTTCTATCGACGGATTCCGTGCCGTAGCTAACGCATTAAGTGCCCCGCCTGGGGAGTACGGCCGCAAGGCTAAAACTCAAAGGAATTGACGGGGGCCCGCACAAGCGGCGGAGCATGTGGCTTAATTCGATGCGACGCGAAGAACCTTACCTGGGTTTGACATGTAGGGAAAAGCCGTAGAGATACGGTGTCCTTCGGGGTCCTACACAGGTGGTGCATGGCTGTCGTCAGCTCGTGTCGTGAGATGTTGGGTTAAGTCCCGCAACGAGCGCAACCC	GGATTAGATACCCTGGTAGTCCACGCCGTAAACGTTGGGCACTAGGTGTGGGGTTCTATCGACGGATTCCGTGCCGTAGCTAACGCATTAAGTGCCCCGCCTGGGGAGTACGGCCGCAAGGCTAAAACTCAAAGGAATTGACGGGGGCCCGCACAAGCGGCGGAGCATGTGGCTTAATTCGATGCGACGCGAAGAACCTTACCTGGGTTTGACATGTAGGGAAAAGCCGTAGAGATACGGTGTCCTTCGGGGTCCTACACAGGTGGTGCATGGCTGTCGTCAGCTCGTGTCGTGAGATGTTGGGTTAAGTCCCGCAACGAGCGCAACCC	0	0	0	0	0	0	3	1	0	2	6	1.5	4	9	4	4	21	5.25	3	1	2	13	19	4.75	1
Aciditerrimonas_14	G	1	0	Aged_1_136297	100	100	N	Aciditerrimonas	rdp|S004429189	-	-	-	-	-	Bacteria	Actinobacteria	Acidimicrobiia	Acidimicrobiales	Acidimicrobiaceae	Aciditerrimonas	Aciditerrimonas	Aged_3_29998;Aged_1_72289;Aged_1_136297;Aged_2_144950;Aged_1_145167;Aged_1_133291;Aged_2_5117	GGATTAGATACCCTGGTAGTCCACGCCGTAAACGTTGGGCACTAGGTGTGGGGATCTATCGACGGTTTCCGTGCCGAAGCTAACGCATTAAGTGCCCCGCCTGGGGAGTACGGCCGCAAGGCTAAAACTCAAAGGAATTGACGGGGGCCCGCACAAGCGGCGGAGCATGTGGCTTAATTCGATGCAACGCGAAGAACCTTACCAAGGCTTGACATGCTGGGTAATCCGTGGAAACACGGTGATCCTTCGGGATCCAGTACAGGTGGTGCATGGCTGTCGTCAGCTCGTGTCGTGAGATGTTGGGTTAAGTCCCGCAACGAGCGCAACCC	GGATTAGATACCCTGGTAGTCCACGCCGTAAACGTTGGGCACTAGGTGTGGGGATCTATCGACGGTTTCCGTGCCGAAGCTAACGCATTAAGTGCCCCGCCTGGGGAGTACGGCCGCAAGGCTAAAACTCAAAGGAATTGACGGGGGCCCGCACAAGCGGCGGAGCATGTGGCTTAATTCGATGCAACGCGAAGAACCTTACCAAGGCTTGACATGCTGGGTAATCCGTGGAAACACGGTGATCCTTCGGGATCCAGTACAGGTGGTGCATGGCTGTCGTCAGCTCGTGTCGTGAGATGTTGGGTTAAGTCCCGCAACGAGCGCAACCC	0	0	0	0	0	0	8	0	4	5	17	4.25	12	48	21	13	94	23.5	30	63	79	226	398	99.5	18
Aciditerrimonas_2	G	1	0	Compost_1_1036	100	100	N	Aciditerrimonas	rdp|S000931737	-	-	-	-	-	Bacteria	Actinobacteria	Acidimicrobiia	Acidimicrobiales	Acidimicrobiaceae	Aciditerrimonas	Aciditerrimonas	Compost_1_121684;Compost_1_143528;Compost_1_121673;Compost_2_143068;Compost_1_1036;Aged_3_4004	GGCTTAGATACCCTGGTAGTCCACGCCGTAAACGTTGGGCACTAGGTGTGGGACTCTATCGACGGGTTCCGTGCCGTAGCTAACGCATTAAGTGCCCCGCCTGGGGAGTACGGCCGCAAGGCTAAAACTCAAAGGAATTGACGGGGGCCCGCACAAGCGGCGGAGCGTGTGGCTTAATTCGATGCAACGCGAAGAACCTTACCTGGGCTTGACATTTTTGGTAAAGCAGGTGAAAGCCTGTGTGCTTCGGCGCCAAAAACAGGTGGTGCATGGCTGTCGTCAGCTCGTGTCGTGAGATGTTGGGTTAAGTCCCGCAACGAGCGCAACCC	GGATTAGATACCCTGGTAGTCCACGCCGTAAACGTTGGGCACTAGGTGTGGGACTCTATCGACGGGTTCCGTGCCGTAGCTAACGCATTAAGTGCCCCGCCTGGGGAGTACGGCCGCAAGGCTAAAACTCAAAGGAATTGACGGGGGCCCGCACAAGCGGCGGAGCGTGTGGCTTAATTCGATGCAACGCGAAGAACCTTACCTGGGCTTGACATTTTTGGTAAAGCAGGTGAAAGCCTGTGTGCTTCGGCGCCAAAAACAGGTGGTGCATGGCTGTCGTCAGCTCGTGTCGTGAGATGTTGGGTTAAGTCCCGCAACGAGCGCAACCC	0	0	0	0	0	0	0	0	0	1	1	0.25	0	2	3	1	6	1.5	20	10	11	25	66	16.5	38
Aciditerrimonas_3	G	1	0	Aged_1_135600	99.696	100	N	Aciditerrimonas	rdp|S000934430	-	-	-	-	-	Bacteria	Actinobacteria	Acidimicrobiia	Acidimicrobiales	Acidimicrobiaceae	Aciditerrimonas	Aciditerrimonas	Aged_1_135600;Aged_2_5171	GGATTAGATACCCTGGTAGTCCACGCCGTAAACGTTGGGCACTAGGTGTGGGGTTCTATCGACGGATTCCGTGCCGTAGCTAACGCATTAAGTGCCCCGCCTGGGGAGTACGGCCGCAAGGCTAAAACTCAAAGGAATTGACGGGGGCCCGCACAAGCGGCGGAGCATGTGGCTTAATTCGATGCGACGCGAAGAACCTTACCTGGGTTTGACATGTAGGGAAAAGCCGTAGAGATACGGTGTCCTTCGGGGCCCTACACAGGTGGTGCATGGCTGTCGTCAGCTCGTGTCGTGAGATGTTGGGTTAAGTCCCGCAACGAGCGCAACCC	GGATTAGATACCCTGGTAGTCCACGCCGTAAACGTTGGGCACTAGGTGTGGGGTTCTATCGACGGATTCCGTGCCGTAGCTAACGCATTAAGTGCCCCGCCTGGGGAGTACGGCCGCAAGGCTAAAACTCAAAGGAATTGACGGGGGCCCGCACAAGCGGCGGAGCATGTGGCTTAATTCGATGCGACGCGAAGAACCTTACCTGGGTTTGACATGTAGGGAAAAACCGTAGAGATACGGTGTCCTTCGGGGCCCTACACAGGTGGTGCATGGCTGTCGTCAGCTCGTGTCGTGAGATGTTGGGTTAAGTCCCGCAACGAGCGCAACCC	0	0	0	0	0	0	5	8	1	2	16	4	31	17	34	45	127	31.75	275	197	212	265	949	237.25	246
Aciditerrimonas_4	G	1	0	Aged_1_107474	100	100	N	Aciditerrimonas	rdp|S001033082	-	-	-	-	-	Bacteria	Actinobacteria	Acidimicrobiia	Acidimicrobiales	Acidimicrobiaceae	Aciditerrimonas	Aciditerrimonas	Aged_1_107474;Aged_1_134242;Aged_1_103597	GGATTAGATACCCTGGTAGTCCACGCCGTAAACGTTGGGCACTAGGTGTGGGACTCTATCGACGGGTTCCGTGCCGTAGCTAACGCATTAAGTGCCCCGCCTGGGGAGTACGGCCGCAAGGCTAAAACTCAAAGGAATTGACGGGGGCCCGCACAAGCGGCGGAGCATGTGGCTTAATTCGATGCAACGCGAAGAACCTTACCTGGGCTTGACATGTAGGGAAAAGCCGTAGAAATACGGTGTCCTTCGGGGTCCTACACAGGTGGTGCATGGCTGTCGTCAGCTCGTGTCGTGAGATGTTGGGTTAAGTCCCGCAACGAGCGCAACCC	GGATTAGATACCCTGGTAGTCCACGCCGTAAACGTTGGGCACTAGGTGTGGGACTCTATCGACGGGTTCCGTGCCGTAGCTAACGCATTAAGTGCCCCGCCTGGGGAGTACGGCCGCAAGGCTAAAACTCAAAGGAATTGACGGGGGCCCGCACAAGCGGCGGAGCATGTGGCTTAATTCGATGCAACGCGAAGAACCTTACCTGGGCTTGACATGTAGGGAAAAGCCGTAGAAATACGGTGTCCTTCGGGGTCCTACACAGGTGGTGCATGGCTGTCGTCAGCTCGTGTCGTGAGATGTTGGGTTAAGTCCCGCAACGAGCGCAACCC	0	0	0	0	0	0	0	0	0	0	0	0	1	0	0	0	1	0.25	5	6	9	7	27	6.75	89
Aciditerrimonas_5	G	1	0	Aged_1_113135	99.392	100	N	Aciditerrimonas	rdp|S001274958	-	-	-	-	-	Bacteria	Actinobacteria	Acidimicrobiia	Acidimicrobiales	Acidimicrobiaceae	Aciditerrimonas	Aciditerrimonas	Aged_1_131038;Aged_3_113411;Aged_1_113135;Aged_1_112190;Aged_1_133065;Aged_1_102297;Aged_1_53115;Aged_1_139571	GGATTAGATACCCTGGTAGTCCACGCCGTAAACGTTGGGCACTAGGTGTGGGGCTCTATCGACGGGCTCCGTGCCGTAGCTAACGCATTAAGTGCCCCGCCTGGGGAGTACGGCCGCAAGGCTAAAACTCAAAGGAATTGACGGGGGCCCGCACAAGCGGCGGAGCATGTTGCTTAATTCGATGCAACGCGAAGAACCTTACCTGGGCTTGACATGCAGGGAAAAGCGGCGGAAACGTCGTGTCCTTCGGGGTCCTGCGCAGGTGGTGCATGGCTGTCGTCAGCTCGTGTCGTGAGATGTTGGGTTAAGTCCCGCAACGAGCGCAACCC	GGATTAGATACCCTGGTAGTCCACGCCGTAAACGTTGGGCACTAGGTGTGGGGCTCTATCGACGGGCTCCGTGCCGTAGCTAACGCATTAAGTGCCCCGCCTGGGGAGTACGGCCGCAAGGCTAAAACTCAAAGGAATTGACGGGGGCCCGCACAAGCGGCGGAGCATGTTGCTTAATTCGATGCAACGCGAAGAACCTTACCTGGGCTTGACATGCGGGGAAAAGCGGCGGAAACGTCGTGTCCTTCGGGGTCCCGCGCAGGTGGTGCATGGCTGTCGTCAGCTCGTGTCGTGAGATGTTGGGTTAAGTCCCGCAACGAGCGCAACCC	0	0	0	0	0	0	1	0	0	0	1	0.25	20	10	11	14	55	13.75	118	62	83	76	339	84.75	32
Aciditerrimonas_6	G	1	0	Aged_1_107386	100	100	N	Aciditerrimonas	rdp|S001571117	-	-	-	-	-	Bacteria	Actinobacteria	Acidimicrobiia	Acidimicrobiales	Acidimicrobiaceae	Aciditerrimonas	Aciditerrimonas	Aged_2_53014;Aged_1_72172;Aged_1_107386;Aged_1_121743;Aged_1_155464;Aged_1_102628	GGATTAGATACCCTGGTAGTCCACGCCGTAAACGTTGGGCACTAGGTGTGGGACTCTATCGACGGGTTCCGTGCCGTAGCTAACGCATTAAGTGCCCCGCCTGGGGAGTACGGCCGCAAGGCTAAAACTCAAAGGAATTGACGGGGGCCCGCACAAGCGGCGGAGCATGTGGCTTAATTCGATGCAACGCGAAGAACCTTACCTGGGCTGAACTATGCGGGAAAAGCCGTAGAGATACGGTGTCCTTCGGGGTCCGCGATAGGTGGTGCATGGCTGTCGTCAGCTCGTGTCGTGAGATGTTGGGTTAAGTCCCGCAACGAGCGCAACCC	GGATTAGATACCCTGGTAGTCCACGCCGTAAACGTTGGGCACTAGGTGTGGGACTCTATCGACGGGTTCCGTGCCGTAGCTAACGCATTAAGTGCCCCGCCTGGGGAGTACGGCCGCAAGGCTAAAACTCAAAGGAATTGACGGGGGCCCGCACAAGCGGCGGAGCATGTGGCTTAATTCGATGCAACGCGAAGAACCTTACCTGGGCTGAACTATGCGGGAAAAGCCGTAGAGATACGGTGTCCTTCGGGGTCCGCGATAGGTGGTGCATGGCTGTCGTCAGCTCGTGTCGTGAGATGTTGGGTTAAGTCCCGCAACGAGCGCAACCC	0	0	0	0	0	0	21	12	46	52	131	32.75	45	82	39	5	171	42.75	1	3	0	2	6	1.5	0
Aciditerrimonas_7	G	1	0	Aged_1_101576	100	100	N	Aciditerrimonas	rdp|S001944961	-	-	-	-	-	Bacteria	Actinobacteria	Acidimicrobiia	Acidimicrobiales	Acidimicrobiaceae	Aciditerrimonas	Aciditerrimonas	Aged_1_110059;Aged_1_112393;Aged_1_101576;Aged_1_100866;Aged_1_11467;Aged_1_105208;Aged_1_107500;Aged_1_100863	GGATTAGATACCCTGGTAGTCCACGCCGTAAACGTTGGGCACTAGGTGTGGGACTCTATCGACGGGTTCCGTGCCGTAGCTAACGCATTAAGTGCCCCGCCTGGGGAGTACGGCCGCAAGGCTAAAACTCAAAGGAATTGACGGGGGCCCGCACAAGCGGCGGAGCGTGTGGCTTAATTCGATGCAACGCGAAGAACCTTACCTGGGCTTGACATTTTCGGTAAAGCGGGTGAAAGCCCGTGTCCTTCGGGGCCGAAAACAGGTGGTGCATGGCTGTCGTCAGCTCGTGTCGTGAGATGTTGGGTTAAGTCCCGCAACGAGCGCAACCC	GGATTAGATACCCTGGTAGTCCACGCCGTAAACGTTGGGCACTAGGTGTGGGACTCTATCGACGGGTTCCGTGCCGTAGCTAACGCATTAAGTGCCCCGCCTGGGGAGTACGGCCGCAAGGCTAAAACTCAAAGGAATTGACGGGGGCCCGCACAAGCGGCGGAGCGTGTGGCTTAATTCGATGCAACGCGAAGAACCTTACCTGGGCTTGACATTTTCGGTAAAGCGGGTGAAAGCCCGTGTCCTTCGGGGCCGAAAACAGGTGGTGCATGGCTGTCGTCAGCTCGTGTCGTGAGATGTTGGGTTAAGTCCCGCAACGAGCGCAACCC	0	0	0	0	0	0	0	0	0	0	0	0	0	0	1	1	2	0.5	1	3	1	1	6	1.5	19
Aciditerrimonas_8	G	1	0	Aged_1_115537	100	100	N	Aciditerrimonas	rdp|S002121026	-	-	-	-	-	Bacteria	Actinobacteria	Acidimicrobiia	Acidimicrobiales	Acidimicrobiaceae	Aciditerrimonas	Aciditerrimonas	Aged_1_11923;Aged_2_37717;Aged_1_115537;Aged_3_138048;Aged_3_44043;Aged_3_21236;Aged_1_127815;Aged_1_95688	GGATTAGATACCCTGGTAGTCCACGCCGTAAACGTTGGGCACTAGGTGTGGGGCTCTATCGACGGGTTCCGTGCCGCAGCTAACGCATTAAGTGCCCCGCCTGGGGAGTACGGCCGCAAGGCTAAAACTCAAAGGAATTGACGGGGGCCCGCACAAGCGGCGGAGCATGTGGCTTAATTCGATGCAACGCGAAGAACCTTACCAAGGCTTGACATGCTGGTTAATCCGTGGAAACACGGTGATCCTTCGGGATCCAGCACAGGTGGTGCATGGCTGTCGTCAGCTCGTGTCGTGAGATGTTGGGTTAAGTCCCGCAACGAGCGCAACCC	GGATTAGATACCCTGGTAGTCCACGCCGTAAACGTTGGGCACTAGGTGTGGGGCTCTATCGACGGGTTCCGTGCCGCAGCTAACGCATTAAGTGCCCCGCCTGGGGAGTACGGCCGCAAGGCTAAAACTCAAAGGAATTGACGGGGGCCCGCACAAGCGGCGGAGCATGTGGCTTAATTCGATGCAACGCGAAGAACCTTACCAAGGCTTGACATGCTGGTTAATCCGTGGAAACACGGTGATCCTTCGGGATCCAGCACAGGTGGTGCATGGCTGTCGTCAGCTCGTGTCGTGAGATGTTGGGTTAAGTCCCGCAACGAGCGCAACCC	0	0	0	0	0	0	0	0	1	0	1	0.25	0	0	0	0	0	0	3	2	0	5	10	2.5	11
Aciditerrimonas_9	G	1	0	Aged_1_29049	99.088	100	N	Aciditerrimonas	rdp|S003545566	-	-	-	-	-	Bacteria	Actinobacteria	Acidimicrobiia	Acidimicrobiales	Acidimicrobiaceae	Aciditerrimonas	Aciditerrimonas	Aged_1_29049;Aged_1_10181;Aged_2_146492;Aged_1_140572	GGATTAGATACCCTGGTAGTCCACGCCGTAAACGTTGGGCACTAGGTGTGGGCCGTTATCAACGCGGTCCGTGCCGTAGCTAACGCATTAAGTGCCCCGCCTGGGGAGTACGGCCGCAAGGCTAAAACTCAAAGGAATTGACGGGGGCCCGCACAAGCAGCGGAGCATGTTGCTTAATTCGAGGCAACGCGAAGAACCTTACCTGGGCTTGACATGTAGGGAAAAGCCGTAGAGATACGGTGTCCTTCGGGGCCCTACACAGGTGGTGCATGGCTGTCGTCAGCTCGTGTCGTGAGATGTTGGGTTAAGTCCCGCAACGAGCGCAACCC	GGATTAGATACCCTGGTAGTCCACGCCGTAAACGTTGGGCACTAGGTGTGGGTCGTTATCAACGCGATCCGTGCCGTAGCTAACGCATTAAGTGCCCCGCCTGGGGAGTACGGCCGCAAGGCTAAAACTCAAAGGAATTGACGGGGGCCCGCACAAGCGGCGGAGCATGTTGCTTAATTCGAGGCAACGCGAAGAACCTTACCTGGGCTTGACATGTAGGGAAAAGCCGTAGAGATACGGTGTCCTTCGGGGCCCTACACAGGTGGTGCATGGCTGTCGTCAGCTCGTGTCGTGAGATGTTGGGTTAAGTCCCGCAACGAGCGCAACCC	0	0	0	0	0	0	1	0	0	0	1	0.25	3	6	1	1	11	2.75	55	127	104	152	438	109.5	110
Acidobacteria_1	P	1	0	Aged_1_141144	100	100	N	Acidobacteria	nt|AM935095.1;rdp|S001164528;silva|AM935095.1.1389	-	-	-	-	-	Bacteria	Acidobacteria	Acidobacteria	Acidobacteria	Acidobacteria	Acidobacteria	Acidobacteria	Aged_2_20977;Aged_1_141144;Aged_1_110793;Aged_1_34458;Aged_3_117817;Aged_1_126695;Aged_2_39499	GGATTAGATACCCCGGTAGTCCTGGCCCTAAACGATGAATGCTTGGTGTAGCGGGTATCGATCCCTGCTGTGCCGAAGCTAACGCATTAAGCATTCCGCCTGGGGAGTACGGTCGCAAGGCTGAAACTCAAAGGAATTGACGGGGGCCCGCACAAGCGGTGGAGCATGTGGTTCAATTCGACGCAACGCGAAGAACCTTACCCAGGCTTGAACTGCGAGGGACAAACCCCGAAAGGGGTCTTCCGCAAGGACTCTCGTAGAGGTGCTGCATGGCTGTCGTCAGCTCGTGTCGTGAGATGTTGGGTTAAGTCCCGCAACGAGCGCAACCC	GGATTAGATACCCCGGTAGTCCTGGCCCTAAACGATGAATGCTTGGTGTAGCGGGTATCGATCCCTGCTGTGCCGAAGCTAACGCATTAAGCATTCCGCCTGGGGAGTACGGTCGCAAGGCTGAAACTCAAAGGAATTGACGGGGGCCCGCACAAGCGGTGGAGCATGTGGTTCAATTCGACGCAACGCGAAGAACCTTACCCAGGCTTGAACTGCGAGGGACAAACCCCGAAAGGGGTCTTCCGCAAGGACTCTCGTAGAGGTGCTGCATGGCTGTCGTCAGCTCGTGTCGTGAGATGTTGGGTTAAGTCCCGCAACGAGCGCAACCC	0	0	0	0	0	0	0	0	0	0	0	0	3	0	1	1	5	1.25	10	15	6	7	38	9.5	15
Acidobacteria_10	P	1	0	Aged_1_122621	100	100	N	Acidobacteria	rdp|S003552284;silva|JQ825028.1.1485	-	-	-	-	-	Bacteria	Acidobacteria	Acidobacteria	Acidobacteria	Acidobacteria	Acidobacteria	Acidobacteria	Aged_1_37548;Aged_1_15987;Aged_1_122621;Aged_1_134169	GGCTTAGATACCCTGGTAGTCCTAGCCCTAAACGATGGATACTTGCTGTGAGGGGGATTGAATCCCTTCGTGGCGAAGCTAACGCATTAAGTATCCCGCCTGGGGAGTACGGTCGCAAGGCTGAAACTCAAAGGAATTGACGGGGGCCCGCACAAGCGGTGGAGTATGTGGTTTAATTCGACGCAACGCGAAGAACCTTACCTGGGCTCGAACGGCTAGCGACAGGCGGCGAAAGTCGCTTTTCCCGCAAGGGACGCTAGTCGAGGTGCTGCATGGCTGTCGTCAGCTCGTGTCGTGAGATGTTGGGTTAAGTCCCGCAACGAGCGCAACCC	GGATTAGATACCCTGGTAGTCCTAGCCCTAAACGATGGATACTTGCTGTGAGGGGGATTGAATCCCTTCGTGGCGAAGCTAACGCATTAAGTATCCCGCCTGGGGAGTACGGTCGCAAGGCTGAAACTCAAAGGAATTGACGGGGGCCCGCACAAGCGGTGGAGTATGTGGTTTAATTCGACGCAACGCGAAGAACCTTACCTGGGCTCGAACGGCTAGCGACAGGCGGCGAAAGTCGCTTTTCCCGCAAGGGACGCTAGTCGAGGTGCTGCATGGCTGTCGTCAGCTCGTGTCGTGAGATGTTGGGTTAAGTCCCGCAACGAGCGCAACCC	0	0	0	0	0	0	4	0	0	0	4	1	14	5	8	13	40	10	23	103	32	83	241	60.25	28
Acidobacteria_11	P	1	0	Aged_3_117896	100	100	N	Acidobacteria	rdp|S004429319;silva|LN573556.1.1386	-	-	-	-	-	Bacteria	Acidobacteria	Acidobacteria	Acidobacteria	Acidobacteria	Acidobacteria	Acidobacteria	Aged_3_117896;Aged_4_127396;Aged_4_105653	GGATTAGATACCCCGGTAGTCCTGGCCCTAAACGATGAATGCTTGGTGTGGTGGGTATCGATCCCTACCGTGCCGAAGCTAACGCATTAAGCATTCCGCCTGGGGAGTACGGTCGCAAGGCTGAAACTCAAAGGAATTGACGGGGGCCCGCACAAGCGGTGGAGCATGTGGTTTAATTCGACGCAACGCGAAGAACCTTACCCAGGCTCGAACGGCAGAGGACATCCTACGAAAGTAGGCTTCCGCAAGGACTTCTGTCGAGGTGCTGCATGGCTGTCGTCAGCTCGTGTCGTGAGATGTTGGGTTAAGTCCCGCAACGAGCGCAACCC	GGATTAGATACCCCGGTAGTCCTGGCCCTAAACGATGAATGCTTGGTGTGGTGGGTATCGATCCCTACCGTGCCGAAGCTAACGCATTAAGCATTCCGCCTGGGGAGTACGGTCGCAAGGCTGAAACTCAAAGGAATTGACGGGGGCCCGCACAAGCGGTGGAGCATGTGGTTTAATTCGACGCAACGCGAAGAACCTTACCCAGGCTCGAACGGCAGAGGACATCCTACGAAAGTAGGCTTCCGCAAGGACTTCTGTCGAGGTGCTGCATGGCTGTCGTCAGCTCGTGTCGTGAGATGTTGGGTTAAGTCCCGCAACGAGCGCAACCC	0	0	0	1	1	0.25	1	0	0	0	1	0.25	1	6	4	3	14	3.5	76	83	92	215	466	116.5	56
Acidobacteria_2	P	1	0	Aged_1_121320	99.392	100	N	Acidobacteria	nt|AM935726.1;rdp|S000493007;silva|AM935726.1.1372	-	-	-	-	-	Bacteria	Acidobacteria	Acidobacteria	Acidobacteria	Acidobacteria	Acidobacteria	Acidobacteria	Aged_2_104687;Aged_1_121320;Aged_1_11665;Aged_1_126735;Aged_1_118759	GGATTAGATACCCCGGTAGTCCTGGCCCTAAACGATGAATGCTTGGTGTGGGGGGTGCCGATCCCTCCCGTGCCGAAGCTAACGCATTAAGCATTCCGCCTGGGGAGTACGGTCGCAAGGCTGAAACTCAAAGGAATTGACGGGGGCCCGCACAAGCGGTGGAGCATGTGGTTTAATTCGACGCAACGCGAAGAACCTTACCCAGGCTTGAACTGTAGATGATCAGCTGCGAAAGTGGCTTCCCGCAAGGGCATCTGCAGAGGTGCTGCATGGCTGTCGTCAGCTCGTGTCGTGAGATGTTGGGTTAAGTCCCGCAACGAGCGCAACCC	GGATTAGATACCCCGGTAGTCCTGGCCCTAAACGATGAATGCTTGGTGTGGGGGGTGCCGATCCCTCCCGTGCCGAAGCTAACGCATTAAGCATTCCGCCTGGGGAGTACGGTCGCAAGGCTGAAACTCAAAGGAATTGACGGGGGCCCGCACAAGCGGTGGAGCATGTGGTTTAATTCGACGCAACGCGAAGAACCTTACCCAGGCTTGAACTGTGGATGACCAGCTGCGAAAGTGGCTTCCCGCAAGGGCATCTGCAGAGGTGCTGCATGGCTGTCGTCAGCTCGTGTCGTGAGATGTTGGGTTAAGTCCCGCAACGAGCGCAACCC	4	0	0	0	4	1	362	44	58	110	574	143.5	1737	840	1227	1202	5006	1251.5	2402	1857	1714	2220	8193	2048.25	905
Acidobacteria_3	P	1	0	Aged_1_108314	99.392	100	N	Acidobacteria	nt|AY922134.1;rdp|S000493368;silva|AY922134.1.1410	-	-	-	-	-	Bacteria	Acidobacteria	Acidobacteria	Acidobacteria	Acidobacteria	Acidobacteria	Acidobacteria	Aged_1_133660;Aged_1_108314;Aged_1_13806;Aged_2_21983;Aged_1_131472;Aged_1_119291	GGATTAGATACCCCGGTAGTCCTGGCCCTAAACGATGAATGCTTGGTGTAGCGGGTATCGATCCCTGCTGTGCCGAAGCTAACGCATTAAGCATTCCGCCTGGGGAGTACGGTCGCAAGGCTGAAACTCAAAGGAATTGACGGGGGCCCGCACAAGCGGTGGAGCATGTGGTTCAATTCGACGCAACGCGAAGAACCTTACCCAGGCTTGAACTGCGAGTGACATCCGGCGAAAGTCGGCTTCCGCAAGGACACTCGTAGAGGTGCTGCATGGCTGTCGTCAGCTCGTGTCGTGAGATGTTGGGTTAAGTCCCGCAACGAGCGCAACCC	GGATTAGATACCCCGGTAGTCCTAGCCCTAAACGATGAATGCTTGGTGTAGCGGGTATCGATCCCTGCTGTGCCGAAGCTAACGCATTAAGCATTCCGCCTGGGGAGTACGGTCGCAAGGCTGAAACTCAAAGGAATTGACGGGGGCCCGCACAAGCGGTGGAGCATGTGGTTCAATTCGACGCAACGCGAAGAACCTTACCCAGGCTTGAACAGCGAGTGACATCCGGCGAAAGTCGGCTTCCGCAAGGACACTCGTAGAGGTGCTGCATGGCTGTCGTCAGCTCGTGTCGTGAGATGTTGGGTTAAGTCCCGCAACGAGCGCAACCC	0	0	0	0	0	0	4	1	0	8	13	3.25	13	5	8	22	48	12	37	58	44	56	195	48.75	11
Acidobacteria_4	P	1	0	Aged_1_113615	99.699	100	N	Acidobacteria	nt|HE974780.1;rdp|S000930903;silva|EU132309.1.1342	-	-	-	-	-	Bacteria	Acidobacteria	Acidobacteria	Acidobacteria	Acidobacteria	Acidobacteria	Acidobacteria	Aged_1_113615;Aged_1_42364;Aged_1_121719	GGATTAGATACCCTGGTAGTCCTAGCCCTAAACGATGGATACTTGCTGTGAGGGGGATTGAATCCCTTCGTGGCGAAGCTAACGCATTAAGTATCCCGCCTGGGGAGTACGGTCGCAAGGCTGAAACTCAAAGGAATTGACGGGGGCCCGCACAAGCGGTGGAGTATGTGGTTTAATTCGACGCAACGCGAAGAACCTTACCTGGGCTCGAACGGCTAGTGACAGGGGATGAAAGTTCCTTTTCCCGCAAGGGACGCTAGTCGAGGTGCTGCATGGCTGTCGTCAGCTCGTGTCGTGAGATGTTGGGTTAAGTCCCGCAACGAGCGCAACCC	GGATTAGATACCCTGGTAGTCCTAGCCCTAAACGATGGATACTTGCTGTGAGGGGGATTGAATCCCTTCGTGGCGAAGCTAACGCATTAAGTATCCCGCCTGGGGAGTACGGTCGCAAGGCTGAAACTCAAAGGAATTGACGGGGGCCCGCACAAGCGGTGGAGTATGTGGTTTAATTCGACGCAACGCGAAGAACCTTACCTGGGCTCGAACGGCTAGTGACAGGGGATGAAAGTTCCTTTTCCCGCAAGGGACACTAGTCGAGGTGCTGCATGGCTGTCGTCAGCTCGTGTCGTGAGATGTTGGGTTAAGTCCCGCAACGAGCGCAACCC	0	0	0	0	0	0	1	0	0	1	2	0.5	2	2	2	6	12	3	13	13	26	40	92	23	9
Acidobacteria_5	P	1	0	Aged_4_171919	99.394	100	N	Acidobacteria	nt|HQ597060.1;rdp|S002993202;silva|HQ597060.1.1505	-	-	-	-	-	Bacteria	Acidobacteria	Acidobacteria	Acidobacteria	Acidobacteria	Acidobacteria	Acidobacteria	Aged_3_19430;Compost_1_10909;Aged_4_171919;Aged_1_9083;Compost_1_115667;Aged_3_118406;Compost_1_105117	GGATTAGATACCCCGGTAGTCCTAGCCCTAAACGATGAGAACTGGGTGTAGAGGGTATGAACCCCCTCTGTGCCGAAGCTAACGCATTAAGTTCTCCGCCTGGGGAGTACGGTCGCAAGGCTGAAACTCAAAGGAATTGACGGGGGCCCGCACAAGCGGTGGAGCATGTGGTTCAATTCGACGCAACGCGAAGAACCTTACCGGGGTTTGAACCGTACGGGACAGCTCTAGAGATAGAGTCTTCCTTCGGGACCCGTATAGAGGTGCTGCATGGCTGTCGTCAGCTCGTGTCGTGAGATGTTGGGTTAAGTCCCGCAACGAGCGCAACCC	GGATTAGATACCCCGGTAGTCCTAGCCCTAAACGATGAGAACTGGGTGTAGGGGGTATGAACCCCCCCTGTGCCGAAGCTAACGCATTAAGTTCTCCGCCTGGGGAGTACGGTCGCAAGGCTGAAACTCAAAGGAATTGACGGGGGCCCGCACAAGCGGTGGAGCATGTGGTTCAATTCGACGCAACGCGAAGAACCTTACCGGGGTTTGAACCGTACGGGACAGCTCTAGAGATAGAGTCTTCCTTCGGGACCCGTATAGAGGTGCTGCATGGCTGTCGTCAGCTCGTGTCGTGAGATGTTGGGTTAAGTCCCGCAACGAGCGCAACCC	0	0	0	0	0	0	0	0	3	0	3	0.75	1	0	0	4	5	1.25	92	40	70	77	279	69.75	233
Acidobacteria_6	P	1	0	Aged_1_69909	100	100	N	Acidobacteria	nt|HQ729783.1;rdp|S002996144;silva|HQ729783.1.1482	-	-	-	-	-	Bacteria	Acidobacteria	Acidobacteria	Acidobacteria	Acidobacteria	Acidobacteria	Acidobacteria	Aged_1_69909;Compost_1_12567;Aged_1_106122;Aged_2_51027	GGATTAGATACCCTGGTAGTCCTAGCCCTAAACGATGGATACTTGCTGTGAGGGGGATTGAATCCCTTCGTGGCGAAGCTAACGCATTAAGTATCCCGCCTGGGGAGTACGGTCGCAAGGCTGAAACTCAAAGGAATTGACGGGGGCCCGCACAAGCGGTGGAGTATGTGGTTTAATTCGACGCAACGCGAAGAACCTTACCTGGGCTCGAACGGCTGGTGACAGGGGATGAAAGTTCCTTTTCCCGCAAGGGACACCAGTCGAGGTGCTGCATGGCTGTCGTCAGCTCGTGTCGTGAGATGTTGGGTTAAGTCCCGCAACGAGCGCAACCC	GGATTAGATACCCTGGTAGTCCTAGCCCTAAACGATGGATACTTGCTGTGAGGGGGATTGAATCCCTTCGTGGCGAAGCTAACGCATTAAGTATCCCGCCTGGGGAGTACGGTCGCAAGGCTGAAACTCAAAGGAATTGACGGGGGCCCGCACAAGCGGTGGAGTATGTGGTTTAATTCGACGCAACGCGAAGAACCTTACCTGGGCTCGAACGGCTGGTGACAGGGGATGAAAGTTCCTTTTCCCGCAAGGGACACCAGTCGAGGTGCTGCATGGCTGTCGTCAGCTCGTGTCGTGAGATGTTGGGTTAAGTCCCGCAACGAGCGCAACCC	0	0	0	0	0	0	3	1	1	0	5	1.25	2	6	4	2	14	3.5	17	34	31	60	142	35.5	14
Acidobacteria_7	P	1	0	Aged_1_111905	99.696	100	N	Acidobacteria	nt|KR922468.1;silva|KR922468.1.782	-	-	-	-	-	Bacteria	Acidobacteria	Acidobacteria	Acidobacteria	Acidobacteria	Acidobacteria	Acidobacteria	Aged_1_111905	GGATTAGATACCCCGGTAGTCCTGGCCCTAAACGATGAATGCTTGGTGTGGTGGGTATCGATCCCCGCCGTGCCGAAGCTAACGCATTAAGCATTCCGCCTGGGGAGTACGGTCGCAAGGCTGAAACTCAAAGGAATTGACGGGGGCCCGCACAAGCGGTGGAGCATGTGGTTCAATTCGACGCAACGCGAAGAACCTTACCTGGGCTCGAACGGCAGATGACATCCTGCGAAAGCAGGCTCCCGCAAGGGCATCTGTCGAGGTGCTGCATGGCTGTCGTCAGCTCGTGTCGTGAGATGTTGGGTTAAGTCCCGCAACGAGCGCAACCC	GGATTAGATACCCCGGTAGTCCTGGCCCTAAACGATGAATGCTTGGTGTGGTGGGTATCGATCCCCGCCGTGCCGAAGCTAACGCATTAAGCATTCCGCCTGGGGAGTACGGTCGCAAGGCTGAAACTCAAAGGAATTGACGGGGGCCCGCACAAGCGGTGGAGCATGTGGTTCAATTCGACGCAACGCGAAGAACCTTACCTGGGCTCGAACGGCAGATGACATCCTGCGAAAGCAGGCTCCCGCAAGGGTATCTGTCGAGGTGCTGCATGGCTGTCGTCAGCTCGTGTCGTGAGATGTTGGGTTAAGTCCCGCAACGAGCGCAACCC	0	0	0	0	0	0	0	0	0	0	0	0	0	0	0	0	0	0	2	0	1	0	3	0.75	31
Acidobacteria_8	P	1	0	Compost_1_111853	100	100	N	Acidobacteria	nt|KT122144.1;rdp|S001078569;silva|EU557898.1.748	-	-	-	-	-	Bacteria	Acidobacteria	Acidobacteria	Acidobacteria	Acidobacteria	Acidobacteria	Acidobacteria	Compost_1_113217;Compost_1_107459;Compost_1_134543;Compost_1_111853	GGCTTAGATACCCCGGTAGTCCTAGCCCTAAACGATGAGCACTGGGTGTAGAGGGTATGAACCCCTTCTGTGCCGAAGCTAACGCATTAAGTGCTCCGCCTGGGGAGTACGGTCGCAAGGCTGAAACTCAAAGGAATTGACGGGGGCCCGCACAAGCGGTGGAGCATGTGGTTCAATTCGACGCAACGCGAAGAACCTTACCGGGGTTTGAACCGCACGGGACAGCTGTAGAGATACAGTCTTCCTTCGGGACCCGTGTAGAGGTGCTGCATGGCTGTCGTCAGCTCGTGTCGTGAGATGTTGGGTTAAGTCCCGCAACGAGCGCAACCC	GGATTAGATACCCCGGTAGTCCTAGCCCTAAACGATGAGCACTGGGTGTAGAGGGTATGAACCCCTTCTGTGCCGAAGCTAACGCATTAAGTGCTCCGCCTGGGGAGTACGGTCGCAAGGCTGAAACTCAAAGGAATTGACGGGGGCCCGCACAAGCGGTGGAGCATGTGGTTCAATTCGACGCAACGCGAAGAACCTTACCGGGGTTTGAACCGCACGGGACAGCTGTAGAGATACAGTCTTCCTTCGGGACCCGTGTAGAGGTGCTGCATGGCTGTCGTCAGCTCGTGTCGTGAGATGTTGGGTTAAGTCCCGCAACGAGCGCAACCC	0	0	0	0	0	0	0	0	0	0	0	0	2	3	1	5	11	2.75	81	49	98	92	320	80	81
Acidobacteria_9	P	1	0	Compost_1_104803	100	100	N	Acidobacteria	rdp|S002419479;silva|EF393561.1.764	-	-	-	-	-	Bacteria	Acidobacteria	Acidobacteria	Acidobacteria	Acidobacteria	Acidobacteria	Acidobacteria	Compost_1_104803;Compost_1_133842	GGATTAGATACCCCGGTAGTCCTAGCTGTAAACGATGAGTGCTGGGTGTAGGGGGTTCTAACCCCCCCTGTGCCGAAGCTAACGCATTAAGCACTCCGCCTGGGGAGTACGGTCGCAAGGCTGAAACTCAAAGGAATTGACGGGGGCCCGCACAAGCGGTGGAGCATGTGGTTCAATTCGACGCAACGCGAAGAACCTTACCGGGGTTTGAACCGTACGGGACAGCTGCAGAGATGTAGTCTTCCTTCGGGACCCGTATAGAGGTGCTGCATGGCTGTCGTCAGCTCGTGTCGTGAGATGTTGGGTTAAGTCCCGCAACGAGCGCAACCC	GGATTAGATACCCCGGTAGTCCTAGCTGTAAACGATGAGTGCTGGGTGTAGGGGGTTCTAACCCCCCCTGTGCCGAAGCTAACGCATTAAGCACTCCGCCTGGGGAGTACGGTCGCAAGGCTGAAACTCAAAGGAATTGACGGGGGCCCGCACAAGCGGTGGAGCATGTGGTTCAATTCGACGCAACGCGAAGAACCTTACCGGGGTTTGAACCGTACGGGACAGCTGCAGAGATGTAGTCTTCCTTCGGGACCCGTATAGAGGTGCTGCATGGCTGTCGTCAGCTCGTGTCGTGAGATGTTGGGTTAAGTCCCGCAACGAGCGCAACCC	0	0	0	0	0	0	0	0	0	0	0	0	0	0	0	0	0	0	6	1	10	29	46	11.5	21
Acidobacteriales_1	O	1	0	Aged_1_106200	99.392	100	N	Acidobacteriales	nt|EU192992.1	-	-	-	-	-	Bacteria	Acidobacteria	Acidobacteriia	Acidobacteriales	Acidobacteriales	Acidobacteriales	Acidobacteriales	Aged_1_113027;Aged_1_50219;Aged_1_106200;Aged_1_106567;Aged_1_142244;Aged_1_115855;Aged_1_101103	GGATTAGATACCCCGGTAGTCCTGGCCCTAAACGATGAATGCTTGGTGTAGCGGGTATCGATCCCTGCTGTGCCGAAGCTAACGCATTAAGCATTCCGCCTGGGGAGTACGGTCGCAAGGCTGAAACTCAAAGGAATTGACGGGGGCCCGCACAAGCGGTGGAGCATGTGGTTTAATTCGACGCAACGCGAAGAACCTTACCCAGGCTCGAACGGTAGCTGACATCCTACGAAAGTAGGCTCCCGCAAGGGCAGCTATCGAGGTGCTGCATGGCTGTCGTCAGCTCGTGTCGTGAGATGTTGGGTTAAGTCCCGCAACGAGCGCAACCC	GGATTAGATACCCCGGTAGTCCTGGCCCTAAACGATGAATGCTTGGTGTGGCGGGTATCGATCCCTGCCGTGCCGAAGCTAACGCATTAAGCATTCCGCCTGGGGAGTACGGTCGCAAGGCTGAAACTCAAAGGAATTGACGGGGGCCCGCACAAGCGGTGGAGCATGTGGTTTAATTCGACGCAACGCGAAGAACCTTACCCAGGCTCGAACGGTAGCTGACATCCTACGAAAGTAGGCTCCCGCAAGGGCAGCTATCGAGGTGCTGCATGGCTGTCGTCAGCTCGTGTCGTGAGATGTTGGGTTAAGTCCCGCAACGAGCGCAACCC	0	0	0	0	0	0	0	0	0	0	0	0	0	0	0	0	0	0	0	0	0	0	0	0	5
Acidobacterium_1	G	1	0	Aged_1_118451	99.696	100	N	Acidobacterium	nt|FJ901380.1	-	-	-	-	-	Bacteria	Acidobacteria	Acidobacteriia	Acidobacteriales	Acidobacteriaceae	Acidobacterium	Acidobacterium	Aged_1_145498;Aged_1_134654;Aged_1_109099;Aged_2_117245;Aged_1_118451;Aged_1_157764	GGCTTAGATACCCTGGTAGTCCACGCCGTAAACGTTGGGCACTAGGTGTGGGTCCTAACCAACGGGATCCGTGCCGTAGCTAACGCACTAAGTGCCCCGCCTGGGGAGTACGGCCGCAAGGCTAAAACTCAAAGGAATTGACGGGGGCCCGCACAAGCGGCGGAGCATGTTGCTTAATTCGAGGCAACGCGAAGAACCTTACCTGGGTTTGACATGTAGGGAAAAGCCGTAGAGATACGGTGTCCTTCGGGGCCCTACACAGGTGGTGCATGGCTGTCGTCAGCTCGTGTCGTGAGATGTTGGGTTAAGTCCCGCAACGAGCGCAACCC	GGATTAGATACCCTGGTAGTCCACGCCGTAAACGTTGGGCACTAGGTGTGGGTCCTAACCAACGGGATCCGTGCCGTAGCTAACGCATTAAGTGCCCCGCCTGGGGAGTACGGCCGCAAGGCTAAAACTCAAAGGAATTGACGGGGGCCCGCACAAGCGGCGGAGCATGTTGCTTAATTCGAGGCAACGCGAAGAACCTTACCTGGGTTTGACATGTAGGGAAAAGCCGTAGAGATACGGTGTCCTTCGGGGCCCTACACAGGTGGTGCATGGCTGTCGTCAGCTCGTGTCGTGAGATGTTGGGTTAAGTCCCGCAACGAGCGCAACCC	0	0	0	0	0	0	0	0	0	0	0	0	0	0	0	1	1	0.25	4	6	7	3	20	5	73
Acidobacterium_2	G	2	0	Aged_1_35440	100	100	N	Acidobacterium	nt|FJ902641.1	-	-	-	-	-	Bacteria	Acidobacteria	Acidobacteriia	Acidobacteriales	Acidobacteriaceae	Acidobacterium	Acidobacterium	Aged_1_111262;Aged_1_35440;Aged_1_27998;Aged_1_105637;Aged_1_14894;Aged_2_137695	GGATTAGATACCCCGGTAGTCCTAGCCTTAAACGATGCTGACTTGGTGTTCCAGGTTTTTAGTCCTGGGGTGCCGGAGCTAACGCGTTAAGTCAGCCGCCTGGGGAGTACGGTCGCAAGGCTGAAACTCAAAGGAATTGACGGGGACCCGCACAAGCGGTGGAGCATGTGGTTTAATTCGACGCAACGCGAAGAACCTTACCTGGGCTAGAATGCGGTGGATAAGCCCTAGAGATAGGGCGATCCGGGTAACCGGCTCCTGCCTGCAAGGTGCTGCATGGCTGTCGTCAGCTCGTGTCGTGAGATGTTGGGTTAAGTCCCGCAACGAGCGCAACCC	GGATTAGATACCCCGGTAGTCCTAGCCTTAAACGATGCTGACTTGGTGTTCCAGGTTTTTAGTCCTGGGGTGCCGGAGCTAACGCGTTAAGTCAGCCGCCTGGGGAGTACGGTCGCAAGGCTGAAACTCAAAGGAATTGACGGGGACCCGCACAAGCGGTGGAGCATGTGGTTTAATTCGACGCAACGCGAAGAACCTTACCTGGGCTAGAATGCGGTGGATAAGCCCTAGAGATAGGGCGATCCGGGTAACCGGCTCCTGCCTGCAAGGTGCTGCATGGCTGTCGTCAGCTCGTGTCGTGAGATGTTGGGTTAAGTCCCGCAACGAGCGCAACCC	0	0	0	0	0	0	0	0	0	0	0	0	0	0	0	0	0	0	21	6	17	20	64	16	69
Acidobacterium_3	G	1	0	Compost_1_41443	99.392	100	N	Acidobacterium	nt|HM103582.1	-	-	-	-	-	Bacteria	Acidobacteria	Acidobacteriia	Acidobacteriales	Acidobacteriaceae	Acidobacterium	Acidobacterium	Compost_1_12468;Compost_1_41443;Compost_1_181337	GGATTAGATACCCCGGTAGTCCTGGCCCTAAACGATGAATGCTTGGTGTGGTGGGTATCGATCCCCGCCGTGCCGAAGCTAACGCATTAAGCATTCCGCCTGGGGAGTACGGTCGCAAGGCTGAAACTCAAAGGAATTGACGGGGGCCCGCACAAGCGGTGGAGCATGTGGTTTAATTCGACGCAACGCGAAGAACCTTACCCAGGCTTGAACTGCAGGTGACATCCTACGAAAGTAGGCTTCCGCAAGGACACCTGTAGAGGTGCTGCATGGCTGTCGTCAGCTCGTGTCGTGAGATGTTGGGTTAAGTCCCGCAACGAGCGCAACCC	GGATTAGATACCCCGGTAGTCCTGGCCCTAAACGATGAATGCTTGGTGTGGCGGGTATCGATCCCTGCCGTGCCGAAGCTAACGCATTAAGCATTCCGCCTGGGGAGTACGGTCGCAAGGCTGAAACTCAAAGGAATTGACGGGGGCCCGCACAAGCGGTGGAGCATGTGGTTTAATTCGACGCAACGCGAAGAACCTTACCCAGGCTTGAACTGCAGGTGACATCCTACGAAAGTAGGCTTCCGCAAGGACACCTGTAGAGGTGCTGCATGGCTGTCGTCAGCTCGTGTCGTGAGATGTTGGGTTAAGTCCCGCAACGAGCGCAACCC	26	1	1	0	28	7	94	27	62	80	263	65.75	271	237	123	348	979	244.75	372	87	132	165	756	189	64
Acidobacterium_4	G	1	0	Aged_1_10787	99.096	100	N	Acidobacterium	nt|JX945555.1	-	-	-	-	-	Bacteria	Acidobacteria	Acidobacteriia	Acidobacteriales	Acidobacteriaceae	Acidobacterium	Acidobacterium	Aged_1_139517;Aged_1_10787;Aged_1_110685;Aged_1_42721;Aged_1_102746	GGATTAGATACCCTGGTAGTCCTAGCCCTAAACGATGGATACTTGCTGTGAGGGGGATTGAATCCCTTTGTGGCGAAGCTAACGCATTAAGTATCCCGCCTGGGGAGTACGGTCGCAAGGCTGAAACTCAAAGGAATTGACGGGGGCCCGCACAAGCGGTGGAGTATGTGGTTTAATTCGACGCAACGCGAAGAACCTTACCTGGGCTCGAACGGCTGGTGACAGGAGGCGAAAGTCTCTTTTCCCGCAAGGGACGCCAGTCGAGGTGCTGCATGGCTGTCGTCAGCTCGTGTCGTGAGATGTTGGGTTAAGTCCCGCAACGAGCGCAACCC	GGATTAGATACCCTGGTAGTCCTAGCCCTAAACTATGGATACTTGCTGTGAGGGGGATTGAATCCCTTTGTGGCGAAGCTAACGCATTAAGTATCCCGCCTGGGGAGTACGGTCGCAAGGCTGAAACTCAAAGGAATTGACGGGGGCCCGCACAAGCGGTGGAGTATGTGGTTTAATTCGACGCAACGCGAAGAACCTTACCTGGGCTCGAACGGCTAGTGACAGGAGGCGAAAGTCTCTTTTCCCGCAAGGGACGCTAGTCGAGGTGCTGCATGGCTGTCGTCAGCTCGTGTCGTGAGATGTTGGGTTAAGTCCCGCAACGAGCGCAACCC	29	14	79	10	132	33	1137	136	401	919	2593	648.25	2656	2200	1999	1273	8128	2032	464	292	380	608	1744	436	401
Acidobacterium_5	G	1	0	Aged_2_19148	100	100	N	Acidobacterium	nt|KJ750900.1	-	-	-	-	-	Bacteria	Acidobacteria	Acidobacteriia	Acidobacteriales	Acidobacteriaceae	Acidobacterium	Acidobacterium	Aged_2_19148;Aged_2_120371;Aged_2_105606;Aged_3_101618	GGATTAGATACCCCGGTAGTCCTAGCCTTAAACGATGCTGACTTGGTGTTCCAGGTTTTTAGTCCTGGGGTGCCGGAGCTAACGCGTTAAGTCAGCCGCCTGGGGAGTACGGTCGCAAGGCTGAAACTCAAAGGAATTGACGGGGACCCGCACAAGCGGTGGAGCATGTGGTTTAATTCGACGCAACGCGAAGAACCTTACCTGGGCTAGAATGCGGTGGATAAGTCCTAGAGATAGGGCGATCCGGGTAACCGGCTCCTGCCTGCAAGGTGCTGCATGGCTGTCGTCAGCTCGTGTCGTGAGATGTTGGGTTAAGTCCCGCAACGAGCGCAACCC	GGATTAGATACCCCGGTAGTCCTAGCCTTAAACGATGCTGACTTGGTGTTCCAGGTTTTTAGTCCTGGGGTGCCGGAGCTAACGCGTTAAGTCAGCCGCCTGGGGAGTACGGTCGCAAGGCTGAAACTCAAAGGAATTGACGGGGACCCGCACAAGCGGTGGAGCATGTGGTTTAATTCGACGCAACGCGAAGAACCTTACCTGGGCTAGAATGCGGTGGATAAGTCCTAGAGATAGGGCGATCCGGGTAACCGGCTCCTGCCTGCAAGGTGCTGCATGGCTGTCGTCAGCTCGTGTCGTGAGATGTTGGGTTAAGTCCCGCAACGAGCGCAACCC	0	0	0	0	0	0	0	0	0	0	0	0	0	1	0	1	2	0.5	15	10	39	18	82	20.5	39
Acinetobacter_MS_1	S	1	2	Litter_2_15391	100	100	N	Acinetobacter_radioresistens;Acinetobacter_variabilis	16SMicrobial|NR_026210.1;16SMicrobial|NR_134685.1	Bacteria_MS	6	Acinetobacter_baumannii;Acinetobacter_calcoaceticus;Acinetobacter_radioresistens;Acinetobacter_refrigeratoris;Acinetobacter_variabilis;Bacillus_subtilis	nt|AB859674.1;nt|KC763178.1;nt|KF417544.1;nt|KF709454.1;nt|KP943724.1;nt|KY088048.1;silva|ACPO01000016.3848.5364;silva|EU867308.1.1372	100.0/100.0	Bacteria	Proteobacteria	Gammaproteobacteria	Pseudomonadales	Moraxellaceae	Acinetobacter	Acinetobacter_MS	Litter_2_15391;Litter_1_81981;Litter_4_100795;Litter_2_36033;Litter_2_104411	GGATTAGATACCCTGGTAGTCCATGCCGTAAACGATGTCTACTAGCCGTTGGGGCCCTTGAGGCTTTAGTGGCGCAGCTAACGCGATAAGTAGACCGCCTGGGGAGTACGGTCGCAAGACTAAAACTCAAATGAATTGACGGGGGCCCGCACAAGCGGTGGAGCATGTGGTTTAATTCGATGCAACGCGAAGAACCTTACCTGGCCTTGACATACAGAGAACTTTCCAGAGATGGATTGGTGCCTTCGGGAACTCTGATACAGGTGCTGCATGGCTGTCGTCAGCTCGTGTCGTGAGATGTTGGGTTAAGTCCCGCAACGAGCGCAACCC	GGATTAGATACCCTGGTAGTCCATGCCGTAAACGATGTCTACTAGCCGTTGGGGCCCTTGAGGCTTTAGTGGCGCAGCTAACGCGATAAGTAGACCGCCTGGGGAGTACGGTCGCAAGACTAAAACTCAAATGAATTGACGGGGGCCCGCACAAGCGGTGGAGCATGTGGTTTAATTCGATGCAACGCGAAGAACCTTACCTGGCCTTGACATACAGAGAACTTTCCAGAGATGGATTGGTGCCTTCGGGAACTCTGATACAGGTGCTGCATGGCTGTCGTCAGCTCGTGTCGTGAGATGTTGGGTTAAGTCCCGCAACGAGCGCAACCC	0	0	0	0	0	0	1	0	1	0	2	0.5	9	5	28	31	73	18.25	368	504	544	493	1909	477.25	514
Acinetobacter_MS_2	S	1	2	Litter_1_68798	100	100	N	Acinetobacter_indicus;Acinetobacter_pragensis	16SMicrobial|NR_117784.1;16SMicrobial|NR_152069.1	Acinetobacter_MS	8	Acinetobacter_baumannii;Acinetobacter_baylyi;Acinetobacter_haemolyticus;Acinetobacter_indicus;Acinetobacter_junii;Acinetobacter_lwoffii;Acinetobacter_pragensis;Acinetobacter_radioresistens	nt|AB859733.1;nt|AM184255.1;nt|DQ418478.1;nt|GU319977.1;nt|HQ908727.1;nt|JX490072.1;nt|JX840391.1;nt|KX014587.1;silva|AB859733.1.1501;silva|AM184255.1.1463;silva|DQ418478.1.1269;silva|GU319977.1.1376;silva|HQ908727.1.1365;silva|JX490072.1.1167;silva|JX840391.1.1456	100.0/100.0	Bacteria	Proteobacteria	Gammaproteobacteria	Pseudomonadales	Moraxellaceae	Acinetobacter	Acinetobacter_MS	Litter_1_40188;Litter_2_110266;Litter_1_68798;Litter_2_13493;Litter_2_103333;Litter_1_146621;Litter_1_128747	GGATTAGATACCCTGGTAGTCCATGCCGTAAACGATGTCTACTAGCCGTTGGGGCCTTTGAGGCTTTAGTGGCGCAGCTAACGCGATAAGTAGACCGCCTGGGGAGTACGGTCGCAAGACTAAAACTCAAATGAATTGACGGGGGCCCGCACAAGCGGTGGAGCATGTGGTTTAATTCGATGCAACGCGAAGAACCTTACCTGGCCTTGACATACAGAGAACTTTCCAGAGATGGATTGGTGCCTTCGGGAACTCTGATACAGGTGCTGCATGGCTGTCGTCAGCTCGTGTCGTGAGATGTTGGGTTAAGTCCCGCAACGAGCGCAACCC	GGATTAGATACCCTGGTAGTCCATGCCGTAAACGATGTCTACTAGCCGTTGGGGCCTTTGAGGCTTTAGTGGCGCAGCTAACGCGATAAGTAGACCGCCTGGGGAGTACGGTCGCAAGACTAAAACTCAAATGAATTGACGGGGGCCCGCACAAGCGGTGGAGCATGTGGTTTAATTCGATGCAACGCGAAGAACCTTACCTGGCCTTGACATACAGAGAACTTTCCAGAGATGGATTGGTGCCTTCGGGAACTCTGATACAGGTGCTGCATGGCTGTCGTCAGCTCGTGTCGTGAGATGTTGGGTTAAGTCCCGCAACGAGCGCAACCC	7	0	0	0	7	1.75	3	1	4	2	10	2.5	27	8	16	25	76	19	107	182	172	181	642	160.5	84
Actinobacteria_MG_1	G	1	2	Aged_1_155760	100	100	N	Conexibacter;Gaiella	nt|GQ420860.1;rdp|S003766512;rdp|S004437459	-	-	-	-	-	Bacteria	Actinobacteria	Actinobacteria_MG	Actinobacteria_MG	Actinobacteria_MG	Actinobacteria_MG	Actinobacteria_MG	Aged_4_166845;Aged_1_155760;Aged_4_109989	GGCTTAGATACCCTGGTAGTCCACGCCGTAAACGATGAGAACTAGGTGTGGGAGGTGTCGACTCCTCCCGTGCCGTCGCTAACGCATTAAGTTCTCCGCCTGGGGAGTACGGCCGCAAGGCTAAAACTCAAAGGAATTGACGGGGGCCCGCACAAGCAGCGGAGCATGTGGTTTAATTCGATGCAACGCGAAGAACCTTACCTGGGTTTGAAATGTTGGTGACAGGTGTGGAAACACATCCTTCCTTCGGGACACCATCACAGGTGGTGCATGGCTGTCGTCAGCTCGTGTCGTGAGATGTTGGGTTAAGTCCCGCAACGAGCGCAACCC	GGATTAGATACCCTGGTAGTCCACGCCGTAAACGATGAGAACTAGGTGTGGGAGGTGTCGACTCCTCCCGTGCCGTCGCTAACGCATTAAGTTCTCCGCCTGGGGAGTACGGCCGCAAGGCTAAAACTCAAAGGAATTGACGGGGGCCCGCACAAGCAGCGGAGCATGTGGTTTAATTCGATGCAACGCGAAGAACCTTACCTGGGTTTGAAATGTTGGTGACAGGTGTGGAAACACATCCTTCCTTCGGGACACCATCACAGGTGGTGCATGGCTGTCGTCAGCTCGTGTCGTGAGATGTTGGGTTAAGTCCCGCAACGAGCGCAACCC	0	0	0	0	0	0	157	0	87	169	413	103.25	280	467	443	191	1381	345.25	0	0	1	2	3	0.75	0
Actinobacteria_MG_2	G	1	2	Aged_1_10243	100	100	N	Aciditerrimonas;Nakamurella	rdp|S000830471;rdp|S000836292	-	-	-	-	-	Bacteria	Actinobacteria	Actinobacteria_MG	Actinobacteria_MG	Actinobacteria_MG	Actinobacteria_MG	Actinobacteria_MG	Aged_1_112456;Aged_1_116766;Aged_1_10243;Aged_1_107021;Aged_1_123500;Aged_1_118151;Aged_1_101980;Aged_1_125991	GGATTAGATACCCTGGTAGTCCACGCCGTAAACGTTGGGCACTAGGTGTGGGACTCTATCGACGGGTTCCGTGCCGTAGCTAACGCATTAAGTGCCCCGCCTGGGGAGTACGGCCGCAAGGCTAAAACTCAAAGGAATTGACGGGGGCCCGCACAAGCGGCGGAGCGTGTGGCTTAATTCGATGCAACGCGAAGAACCTTACCTGGGCTTGACATGTACGGTAAAGCGGGTGAAAGCCCGTGTGCTTCGGCGCCGTACACAGGTGGTGCATGGCTGTCGTCAGCTCGTGTCGTGAGATGTTGGGTTAAGTCCCGCAACGAGCGCAACCC	GGATTAGATACCCTGGTAGTCCACGCCGTAAACGTTGGGCACTAGGTGTGGGACTCTATCGACGGGTTCCGTGCCGTAGCTAACGCATTAAGTGCCCCGCCTGGGGAGTACGGCCGCAAGGCTAAAACTCAAAGGAATTGACGGGGGCCCGCACAAGCGGCGGAGCGTGTGGCTTAATTCGATGCAACGCGAAGAACCTTACCTGGGCTTGACATGTACGGTAAAGCGGGTGAAAGCCCGTGTGCTTCGGCGCCGTACACAGGTGGTGCATGGCTGTCGTCAGCTCGTGTCGTGAGATGTTGGGTTAAGTCCCGCAACGAGCGCAACCC	0	0	0	0	0	0	0	0	1	0	1	0.25	1	1	0	3	5	1.25	11	10	23	40	84	21	13
Actinobacteria_MG_3	G	1	2	Middle_2_113053	99.39	100	Y	Thermasporomyces;Thermobispora	rdp|S002161647;silva|FN667034.1.1467	-	-	-	-	-	Bacteria	Actinobacteria	Actinobacteria_MG	Actinobacteria_MG	Actinobacteria_MG	Actinobacteria_MG	Actinobacteria_MG	Middle_2_113053	GGATTAGATACCCTGGTAGTCCACGCCGTAAACGTTGGGCGCTAGGTGTGGGGATCTTTTGTGATCTCCGTGCCGTAGCTAACGCATTAAGCGCCCCGCCTGGGGAGTACGGCCGCAAGGCTAAAACTCAAAGGAATTGACGGGGGCCCGCACAAGCGGCGGAGCATGTTGCTTAATTCGAGGCAACGCGAAGAACCTTACCTGGGCTTGACATGCAGGGAAAAGCCGTAGAGATACGGTGTCCTTCGGGGCCCTGCACAGGTGGTGCATGGCTGTCGTCAGCTCGTGTCGTGAGATGTTGGGTTAAGTCCCGCAACGAGCGCAACCC	GGATTAGATACCCTGGTAGTCCACGCCGTAAACGTTGGGCGCTAGGTGTGGGGATCTTTTGTGATCTCCGTGCCGTAGCTAACGCATTAAGCGCCCCGCCTGGGGAGTACGGCCGCAAGGCTAAAACTCAAAGGAACTGACGGGGGCCCGCACAAGCGGCGGAGCATGTTGCTTAATTCGAGGCAACGCGAAGAACCTTACCTGGGCTTGACATGCAGGGAAAAGCCGTAGAGATACGGTGTCCTTTGGGGCCCTGCACAGGTGGTGCATGGCTGTCGTCAGCTCGTGTCGTGAGATGTTGGGTTAAGTCCCGCAACGAGCGCAACCC	0	0	0	0	0	0	0	0	0	0	0	0	0	0	0	0	0	0	16	11	26	39	92	23	4
Actinobacteria_MS_1	S	1	65	Aged_1_116343	100	100	N	Prauserella_marina;Streptomyces_acrimycini;Streptomyces_albolongus;Streptomyces_albovinaceus;Streptomyces_alboviridis;Streptomyces_anulatus;Streptomyces_araujoniae;Streptomyces_argenteolus;Streptomyces_atroolivaceus;Streptomyces_baarnensis;Streptomyces_bacillaris;Streptomyces_badius;Streptomyces_bikiniensis;Streptomyces_brevispora;Streptomyces_californicus;Streptomyces_candidus;Streptomyces_cavis…	16SMicrobial|NR_025155.1;16SMicrobial|NR_026177.1;16SMicrobial|NR_028988.1;16SMicrobial|NR_040781.1;16SMicrobial|NR_041062.1;16SMicrobial|NR_041093.1;16SMicrobial|NR_041114.1;16SMicrobial|NR_041118.1;16SMicrobial|NR_041123.1;16SMicrobial|NR_041144.1;16SMicrobial|NR_041146.1	Streptomyces_MS	72	Streptomyces_albidoflavus;Streptomyces_albolongus;Streptomyces_albus;Streptomyces_anulatus;Streptomyces_argenteolus;Streptomyces_atratus;Streptomyces_atroolivaceus;Streptomyces_baarnensis;Streptomyces_bacillaris;Streptomyces_badius;Streptomyces_bikiniensis;Streptomyces_brasiliensis;Streptomyces_brevispora;Streptomyces_californicus;Streptomyces_candidus;Streptomyces_cavourensis;Streptomyces_cinere…	nt|CP020563.1;nt|CP020570.1;nt|CP022438.1;nt|CP024957.1;nt|CP026304.1;nt|CP029361.1;nt|CP029378.1;nt|CP032543.1;nt|KR140205.1;nt|KU291363.1;nt|KX358632.1;silva|ABYX02000001.3278556.3280072;silva|CP020563.1353778.1355311;silva|CP020570.1347961.1349492;silva|D63872.1.1532;silva|DQ026637.1.1493;silva|DQ026663.1.1483;silva|DQ026670.1.1499;silva|DQ192119.1.870;silva|DQ192120.1.870;silva|DQ192121.1.870…	100.0/100.0	Bacteria	Actinobacteria	Actinobacteria_MS	Actinobacteria_MS	Actinobacteria_MS	Actinobacteria_MS	Actinobacteria_MS	Aged_1_116343	GGCTTAGATACCCTGGTAGTCCACGCCGTAAACGTTGGGAACTAGGTGTTGGCGACATTCCACGTCGTCGGTGCCGCAGCTAACGCATTAAGTTCCCCGCCTGGGGAGTACGGCCGCAAGGCTAAAACTCAAAGGAATTGACGGGGGCCCGCACAAGCAGCGGAGCATGTGGCTTAATTCGACGCAACGCGAAGAACCTTACCAAGGCTTGACATATACCGGAAAGCATCAGAGATGGTGCCCCCCTTGTGGTCGGTATACAGGTGGTGCATGGCTGTCGTCAGCTCGTGTCGTGAGATGTTGGGTTAAGTCCCGCAACGAGCGCAACCC	GGATTAGATACCCTGGTAGTCCACGCCGTAAACGTTGGGAACTAGGTGTTGGCGACATTCCACGTCGTCGGTGCCGCAGCTAACGCATTAAGTTCCCCGCCTGGGGAGTACGGCCGCAAGGCTAAAACTCAAAGGAATTGACGGGGGCCCGCACAAGCAGCGGAGCATGTGGCTTAATTCGACGCAACGCGAAGAACCTTACCAAGGCTTGACATATACCGGAAAGCATCAGAGATGGTGCCCCCCTTGTGGTCGGTATACAGGTGGTGCATGGCTGTCGTCAGCTCGTGTCGTGAGATGTTGGGTTAAGTCCCGCAACGAGCGCAACCC	0	0	0	0	0	0	1	0	0	0	1	0.25	0	1	0	3	4	1	54	33	49	52	188	47	135
Actinobacteria_MS_2	S	1	16	Aged_1_20588	100	100	N	Arthrobacter_bambusae;Arthrobacter_boritolerans;Arthrobacter_ginsengisoli;Arthrobacter_psychrochitiniphilus;Corynebacterium_ilicis;Paenarthrobacter_aurescens;Paenarthrobacter_ilicis;Paenarthrobacter_nicotinovorans;Paenarthrobacter_nitroguajacolicus;Pseudarthrobacter_defluvii;Pseudarthrobacter_oxydans;Pseudarthrobacter_phenanthrenivorans;Pseudarthrobacter_polychromogenes;Pseudarthrobacter_scleroma…	nt|AB288059.1;nt|AB363932.1;nt|AY512631.1;nt|EU086789.1;nt|FN908773.1;nt|FR870442.1;nt|GU332595.1;nt|JQ955626.1;nt|KC934812.1;nt|KF528714.1;nt|KU160185.1;silva|AB363932.1.1445;silva|AY512631.1.1452;silva|AZVC01000034.41.1372;silva|EU086789.1.1442;silva|FR870442.1.1460;silva|GU332595.1.1381;silva|KC934812.1.1384;silva|KF528714.1.1416;silva|KU160185.1.1469;silva|KU204875.1.1394;silva|KX056505.1.1389	-	-	-	-	-	Bacteria	Actinobacteria	Actinobacteria_MS	Actinobacteria_MS	Actinobacteria_MS	Actinobacteria_MS	Actinobacteria_MS	Aged_1_92905;Aged_2_52282;Aged_1_20588;Aged_4_146765	GGCTTAGATACCCTGGTAGTCCATGCCGTAAACGTTGGGCACTAGGTGTGGGGGACATTCCACGTTTTCCGCGCCGTAGCTAACGCATTAAGTGCCCCGCCTGGGGAGTACGGCCGCAAGGCTAAAACTCAAAGGAATTGACGGGGGCCCGCACAAGCGGCGGAGCATGCGGATTAATTCGATGCAACGCGAAGAACCTTACCAAGGCTTGACATGAACCGGTAATACCTGGAAACAGGTGCCCCGCTTGCGGTCGGTTTACAGGTGGTGCATGGTTGTCGTCAGCTCGTGTCGTGAGATGTTGGGTTAAGTCCCGCAACGAGCGCAACCC	GGATTAGATACCCTGGTAGTCCATGCCGTAAACGTTGGGCACTAGGTGTGGGGGACATTCCACGTTTTCCGCGCCGTAGCTAACGCATTAAGTGCCCCGCCTGGGGAGTACGGCCGCAAGGCTAAAACTCAAAGGAATTGACGGGGGCCCGCACAAGCGGCGGAGCATGCGGATTAATTCGATGCAACGCGAAGAACCTTACCAAGGCTTGACATGAACCGGTAATACCTGGAAACAGGTGCCCCGCTTGCGGTCGGTTTACAGGTGGTGCATGGTTGTCGTCAGCTCGTGTCGTGAGATGTTGGGTTAAGTCCCGCAACGAGCGCAACCC	185	5	125	12	327	81.75	20	42	11	31	104	26	27	10	22	6	65	16.25	4	5	22	19	50	12.5	7
Actinocorallia_1	G	1	0	Compost_1_15939	99.696	100	N	Actinocorallia	nt|KR817797.1;rdp|S000433751;silva|AJ427687.1.476	-	-	-	-	-	Bacteria	Actinobacteria	Actinobacteria	Streptosporangiales	Thermomonosporaceae	Actinocorallia	Actinocorallia	Compost_1_15939;Compost_1_163382;Aged_1_96325;Compost_1_105555	GGATTAGATACCCTGGTAGTCCACGCCGTAAACGTTGGGCGCTAGGTGTGGGGGCCTTCCACGGTTTCCGCGCCGCAGCTAACGCATTAAGCGCCCCGCCTGGGGAGTACGGCCGCAAGGCTAAAACTCAAAGGAATTGACGGGGGCCCGCACAAGCGGCGGAGCATGTTGCTTAATTCGACGCAACGCGAAGAACCTTACCAAGGCTTGACATCGCCGGAAAACCTCCAGAGATGGGGGGTCCCTTGTGGGCCGGTGACAGGTGGTGCATGGCTGTCGTCAGCTCGTGTCGTGAGATGTTGGGTTAAGTCCCGCAACGAGCGCAACCC	GGATTAGATACCCTGGTAGTCCACGCCGTAAACGTTGGGCGCTAGGTGTGGGGACCTTCCACGGTTTCCGCGCCGCAGCTAACGCATTAAGCGCCCCGCCTGGGGAGTACGGCCGCAAGGCTAAAACTCAAAGGAATTGACGGGGGCCCGCACAAGCGGCGGAGCATGTTGCTTAATTCGACGCAACGCGAAGAACCTTACCAAGGCTTGACATCGCCGGAAAACCTCCAGAGATGGGGGGTCCCTTGTGGGCCGGTGACAGGTGGTGCATGGCTGTCGTCAGCTCGTGTCGTGAGATGTTGGGTTAAGTCCCGCAACGAGCGCAACCC	0	0	0	0	0	0	0	0	0	0	0	0	0	1	0	0	1	0.25	8	5	18	12	43	10.75	2
Actinomadura_bangladeshensis_1	S	1	0	Aged_3_165220	99.091	100	N	Actinomadura_bangladeshensis	nt|JQ972881.1;silva|JQ972881.1.1511	-	-	-	-	-	Bacteria	Actinobacteria	Actinobacteria	Streptosporangiales	Thermomonosporaceae	Actinomadura	Actinomadura_bangladeshensis	Aged_3_165220;Aged_3_122672;Aged_1_57535;Aged_3_10877	GGATTAGATACCCTGGTAGTCCACGCCGTAAACGTTGGGCGCTAGGTGTGGGGTTCTTCCACGGGTTCCGCGCCGTAGCTAACGCATTAAGCGCCCCGCCTGGGGAGTACGGCCGCAAGGCTAAAACTCAAAGGAATTGACGGGGGCCCGCACAAGCGGCGGAGCATGTTGCTTAATTCGACGCAACGCGAAGAACCTTACCAAGGCTTGACATCGCCGGAAATCCCGTAGAGATACGGGGTCCTTTTTGGGGCCGGTGACAGGTGGTGCATGGCTGTCGTCAGCTCGTGTCGTGAGATGTTGGGTTAAGTCCCGCAACGAGCGCAACCC	GGATTAGATACCCAAGTAGTCCACGCCGTAAACGTTGGGCGCTAGGTGTGGGGTTCTTCCACGGATTCCGCGCCGTAGCTAACGCATTAAGCGCCCCGCCTGGGGAGTACGGCCGCAAGGCTAAAACTCAAAGGAATTGACGGGGGCCCGCACAAGCGGCGGAGCATGTTGCTTAATTCGACGCAACGCGAAGAACCTTACCAAGGCTTGACATCGCCGGAAATCCCGTAGAGATGCGGGGTCCTTTTTNGGGCCGGTGACAGGTGGTGCATGGCTGTCGTCAGCTCGTGTCGTGAGATGTTGGGTTAAGTCCCGAAACGAGCGAAACCC	0	1	0	1	2	0.5	131	39	87	158	415	103.75	642	509	753	639	2543	635.75	1253	1382	1321	1437	5393	1348.25	1164
Actinomadura_keratinilytica_1	S	1	0	Aged_1_144380	100	100	N	Actinomadura_keratinilytica	16SMicrobial|NR_044544.1	Actinomadura_keratinilytica	0	Actinomadura_keratinilytica	nt|GQ153848.1;silva|EU637009.1.1488	100.0/100.0	Bacteria	Actinobacteria	Actinobacteria	Streptosporangiales	Thermomonosporaceae	Actinomadura	Actinomadura_keratinilytica	Aged_1_68520;Aged_2_19654;Aged_1_113195;Aged_1_144380;Aged_1_85578;Middle_2_78998;Aged_2_127338;Aged_1_68073	GGATTAGATACCCTGGTAGTCCACGCCGTAAACGTTGGGCGCTAGGTGTGGGGTTCTTCCACGGATTCCGCGCCGTAGCTAACGCATTAAGCGCCCCGCCTGGGGAGTACGGCCGCAAGGCTAAAACTCAAAGGAATTGACGGGGGCCCGCACAAGCGGCGGAGCATGTTGCTTAATTCGACGCAACGCGAAGAACCTTACCAAGGCTTGACATCACCCGAAAACCTGCAGAGATGCGGGGTCCTTTTTGGGCGGGTGACAGGTGGTGCATGGCTGTCGTCAGCTCGTGTCGTGAGATGTTGGGTTAAGTCCCGCAACGAGCGCGACCC	GGATTAGATACCCTGGTAGTCCACGCCGTAAACGTTGGGCGCTAGGTGTGGGGTTCTTCCACGGATTCCGCGCCGTAGCTAACGCATTAAGCGCCCCGCCTGGGGAGTACGGCCGCAAGGCTAAAACTCAAAGGAATTGACGGGGGCCCGCACAAGCGGCGGAGCATGTTGCTTAATTCGACGCAACGCGAAGAACCTTACCAAGGCTTGACATCACCCGAAAACCTGCAGAGATGCGGGGTCCTTTTTGGGCGGGTGACAGGTGGTGCATGGCTGTCGTCAGCTCGTGTCGTGAGATGTTGGGTTAAGTCCCGCAACGAGCGCAACCC	0	0	0	0	0	0	17	0	1	3	21	5.25	4	1	9	3	17	4.25	43	15	25	41	124	31	68
Actinomadura_MS_1	S	1	4	Compost_2_106068	100	100	N	Actinomadura_bangladeshensis;Actinomadura_geliboluensis;Actinomadura_hallensis;Actinomadura_sputi	16SMicrobial|NR_041618.1;16SMicrobial|NR_043529.1;16SMicrobial|NR_109059.1;16SMicrobial|NR_116929.1	Actinomadura_MS	6	Actinomadura_bangladeshensis;Actinomadura_cremea;Actinomadura_geliboluensis;Actinomadura_hallensis;Actinomadura_meyerae;Actinomadura_sputi	nt|EU741181.1;nt|KX129887.1;nt|MH472997.1;nt|NR_041618.1;nt|NR_043529.1;nt|NR_116929.1;silva|AB331652.1.1497;silva|DQ076484.1.1528;silva|EU741181.1.1484;silva|FM957483.1.1509;silva|HQ157187.1.1490;silva|HQ291073.1.1441	100.0/100.0	Bacteria	Actinobacteria	Actinobacteria	Streptosporangiales	Thermomonosporaceae	Actinomadura	Actinomadura_MS	Compost_2_106068;Compost_2_66376;Aged_3_175206	GGATTAGATACCCTGGTAGTCCACGCCGTAAACGTTGGGCGCTAGGTGTGGGGTTCTTCCACGGATTCCGCGCCGTAGCTAACGCATTAAGCGCCCCGCCTGGGGAGTACGGCCGCAAGGCTAAAACTCAAAGGAATTGACGGGGGCCCGCACAAGCGGCGGAGCATGTTGCTTAATTCGACGCAACGCGAAGAACCTTACCAAGGCTTGACATCGCCGGAAATCCCGCAGAGATGCGGGGTCCTTTTTGGGCCGGTGACAGGTGGTGCATGGCTGTCGTCAGCTCGTGTCGTGAGATGTTGGGTTAAGTCCCGCAACGAGCGCAACCC	GGATTAGATACCCTGGTAGTCCACGCCGTAAACGTTGGGCGCTAGGTGTGGGGTTCTTCCACGGATTCCGCGCCGTAGCTAACGCATTAAGCGCCCCGCCTGGGGAGTACGGCCGCAAGGCTAAAACTCAAAGGAATTGACGGGGGCCCGCACAAGCGGCGGAGCATGTTGCTTAATTCGACGCAACGCGAAGAACCTTACCAAGGCTTGACATCGCCGGAAATCCCGCAGAGATGCGGGGTCCTTTTTGGGCCGGTGACAGGTGGTGCATGGCTGTCGTCAGCTCGTGTCGTGAGATGTTGGGTTAAGTCCCGCAACGAGCGCAACCC	0	0	0	1	1	0.25	0	0	0	0	0	0	0	0	1	0	1	0.25	1	0	0	0	1	0.25	69
Actinomadura_MS_2	S	1	2	Aged_1_37256	99.696	100	N	Actinomadura_echinospora;Actinomadura_keratinilytica	16SMicrobial|NR_042114.1;16SMicrobial|NR_044544.1	Actinomadura_MS	3	Actinomadura_echinospora;Actinomadura_keratinilytica;Actinomadura_rubrobrunea	nt|GQ153848.1;nt|NR_042114.1;silva|AJ420135.1.1440;silva|BCQU01000204.8.1514;silva|EU637009.1.1488	99.696/100.0	Bacteria	Actinobacteria	Actinobacteria	Streptosporangiales	Thermomonosporaceae	Actinomadura	Actinomadura_MS	Aged_4_196026;Aged_1_37256;Aged_3_170159;Aged_2_15812;Aged_1_74193	GGATTAGATACCCTGGTAGTCCACGCCGTAAACGTTGGGCGCTAGGTGTGGGGTTCTTCCACGGATTCCGCGCCGTAGCTAACGCATTAAGCGCCCCGCCTGGGGAGTACGGCCGCAAGGCTAAAACTCAAAGGAATTGACGGGGGCCCGCACAAGCGGCGGAGCATGTTGCTTAATTCGACGCAACGCGAAGAACCTTACCAAGGCTTGACATCACCCGAAAACCTGCAGAGATGTGGGGTCCTTTTTGGGCGGGTGACAGGTGGTGCATGGCTGTCGTCAGCTCGTGTCGTGAGATGTTGGGTTAAGTCCCGCAACGAGCGCAACCC	GGATTAGATACCCAAGTAGTCCACGCCGTAAACGTTGGGCGCTAGGTGTGGGGTTCTTCCACGGATTCCGCGCCGTAGCTAACGCATTAAGCGCCCCGCCTGGGGAGTACGGCCGCAAGGCTAAAACTCAAAGGAATTGACGGGGGCCCGCACAAGCGGCGGAGCATGTTGCTTAATTCGACGCAACGCGAAGAACCTTACCAAGGCTTGACATCACCCGAAAACCTGCAGAGATGTGGGGTCCNTTTTGGGCGGGTGACAGGTGGTGCATGGCTGTCGTCAGCTCGTGTCGTGAGATGTTGGGTTAAGTCCCGAAACGAGCGAAACCC	0	0	0	0	0	0	3	0	0	1	4	1	2	2	1	0	5	1.25	11	4	5	28	48	12	7
Actinomadura_rubrobrunea_1	S	1	0	Aged_1_31084	99.392	100	N	Actinomadura_rubrobrunea	16SMicrobial|NR_044543.1	-	-	-	-	-	Bacteria	Actinobacteria	Actinobacteria	Streptosporangiales	Thermomonosporaceae	Actinomadura	Actinomadura_rubrobrunea	Aged_2_49660;Aged_1_31084;Aged_2_104126;Aged_2_33336	GGATTAGATACCCTGGTAGTCCACGCCGTAAACGTTGGGCGCTAGGTGTGGGGTTCTTCCACGGGTTCCGCGCCGTAGCTAACGCATTAAGCGCCCCGCCTGGGGAGTACGGCCGCAAGGCTAAAACTCAAAGGAATTGACGGGGGCCCGCACAAGCGGCGGAGCATGTTGCTTAATTCGACGCAACGCGAAGAACCTTACCAAGGCTTGACATCACTCGAAAACCTGCAGAGATGTGGGGTCCTTTTTGGGCGGGTGACAGGTGGTGCATGGCTGTCGTCAGCTCGTGTCGTGAGATGTTGGGTTAAGTCCCGCAACGAGCGCAACCC	GGATTAGATACCCTGGTAGTCCACGCCGTAAACGTTGGGCGCTAGGTGTGGGGTTCTTCCACGGATTCCGCGCCGTAGCTAACGCATTAAGCGCCCCGCCTGGGGAGTACGGCCGCAAGGCTAAAACTCAAAGGAATTGACGGGGGCCCGCACAAGCGGCGGAGCATGTTGCCTAATTCGACGCAACGCGAAGAACCTTACCAAGGCTTGACATCACTCGAAAACCTGCAGAGATGTGGGGTCCTTTTTGGGCGGGTGACAGGTGGTGCATGGCTGTCGTCAGCTCGTGTCGTGAGATGTTGGGTTAAGTCCCGCAACGAGCGCAACCC	0	0	0	0	0	0	0	0	0	0	0	0	0	3	0	2	5	1.25	34	21	38	41	134	33.5	32
Actinomadura_rubrobrunea_2	S	1	0	Aged_1_108322	100	100	N	Actinomadura_rubrobrunea	silva|BCQU01000204.8.1514	-	-	-	-	-	Bacteria	Actinobacteria	Actinobacteria	Streptosporangiales	Thermomonosporaceae	Actinomadura	Actinomadura_rubrobrunea	Aged_1_116314;Aged_1_108322;Aged_1_125014;Aged_4_16926;Aged_3_41468	GGATTAGATACCCTGGTAGTCCACGCCGTAAACGTTGGGCGCTAGGTGTGGGGTTCTTCCACGGATTCCGCGCCGTAGCTAACGCATTAAGCGCCCCGCCTGGGGAGTACGGCCGCAAGGCTAAAACTCAAAGGAATTGACGGGGGCCCGCACAAGCGGCGGAGCATGTTGCTTAATTCGACGCAACGCGAAGAACCTTACCAAGGCTTGACATCACTCGAAAACCTGCAGAGATGTGGGGTCCTTTTTGGGCGGGTGACAGGTGGTGCATGGCTGTCGTCAGCTCGTGTCGTGAGATGTTGGGTTAAGTCCCGCAACGAGCGCAACCC	GGATTAGATACCCTGGTAGTCCACGCCGTAAACGTTGGGCGCTAGGTGTGGGGTTCTTCCACGGATTCCGCGCCGTAGCTAACGCATTAAGCGCCCCGCCTGGGGAGTACGGCCGCAAGGCTAAAACTCAAAGGAATTGACGGGGGCCCGCACAAGCGGCGGAGCATGTTGCTTAATTCGACGCAACGCGAAGAACCTTACCAAGGCTTGACATCACTCGAAAACCTGCAGAGATGTGGGGTCCTTTTTGGGCGGGTGACAGGTGGTGCATGGCTGTCGTCAGCTCGTGTCGTGAGATGTTGGGTTAAGTCCCGCAACGAGCGCAACCC	0	0	0	0	0	0	85	32	83	150	350	87.5	135	160	60	54	409	102.25	20	39	40	87	186	46.5	29
Actinomarinales_1	O	11	0	Aged_1_101341	100	100	N	Actinomarinales	silva|ADGO01001972.76.1349	-	-	-	-	-	Bacteria	Actinobacteria	Actinomarinidae	Actinomarinales	Actinomarinales	Actinomarinales	Actinomarinales	Aged_1_144656;Aged_1_106942;Aged_1_17391;Aged_1_100556;Aged_1_100335;Aged_1_101341;Aged_1_101015;Aged_2_10119;Aged_1_25836;Aged_1_127746;Aged_2_69285;Aged_1_161711;Aged_1_107336;Aged_1_108903;Aged_1_100877;Aged_1_100517	GGATTAGATACCCTGGTAGTCCACGCCGTAAACGTTGGGTACTAGGTGTGGCGTCTCGATCAACGGATGCCGTGCCGAAGCTAACGCATTAAGTACCCCGCCTGGGGAGTACGGCCGCAAGGCTAAAACTCAAAGGAATTGACGGGTCCCCGCACAAGCGGCGGAGCATGCGGCTTAATTCGATGCAACCCGAAGAACCTTACCTGGGCTTGACATCACGGGAAAAGCCGTAGAAATACGGTGTCCGTAAGGGCCCGTGACAGGTGGTGCATGGCTGTCGTCAGCTCGTGTCGTGAGATGTTGGGTTAAGTCCCGCAACGAGCGCAACCC	GGATTAGATACCCTGGTAGTCCACGCCGTAAACGTTGGGTACTAGGTGTGGCGTCTCGATCAACGGATGCCGTGCCGAAGCTAACGCATTAAGTACCCCGCCTGGGGAGTACGGCCGCAAGGCTAAAACTCAAAGGAATTGACGGGTCCCCGCACAAGCGGCGGAGCATGCGGCTTAATTCGATGCAACCCGAAGAACCTTACCTGGGCTTGACATCACGGGAAAAGCCGTAGAAATACGGTGTCCGTAAGGGCCCGTGACAGGTGGTGCATGGCTGTCGTCAGCTCGTGTCGTGAGATGTTGGGTTAAGTCCCGCAACGAGCGCAACCC	0	0	0	0	0	0	1	0	0	0	1	0.25	0	1	0	0	1	0.25	37	10	12	24	83	20.75	8
Actinomarinales_2	O	6	0	Aged_1_115923	100	100	N	Actinomarinales	silva|HQ183924.1.1488	-	-	-	-	-	Bacteria	Actinobacteria	Actinomarinidae	Actinomarinales	Actinomarinales	Actinomarinales	Actinomarinales	Aged_1_160702;Aged_1_123352;Aged_1_115923;Aged_1_101356;Aged_1_53040;Aged_1_148843;Aged_1_109499;Aged_1_107434	GGATTAGATACCCTGGTAGTCCACGCCGTAAACGTTGGATACTAGGTGTGGCGGTCTACCAACGACTGCCGTGCCGAAGCTAACGCATTAAGTATCCCGCCTGGGGAGTACGGCCGCAAGGCTAAAACTCAAAGGAATTGACGGGTCCCCGCACAAGCGGCGGAGCATGCGGCTTAATTCGATGCAACCCGAAGAACCTTACCTGGGTTTGACATCATGGGAAAAGCCGTAGAAATACGGTGTCCGAAAGGGCCCATGACAGGTGGTGCATGGCTGTCGTCAGCTCGTGTCGTGAGATGTTGGGTTAAGTCCCGCAACGAGCGCAACCC	GGATTAGATACCCTGGTAGTCCACGCCGTAAACGTTGGATACTAGGTGTGGCGGTCTACCAACGACTGCCGTGCCGAAGCTAACGCATTAAGTATCCCGCCTGGGGAGTACGGCCGCAAGGCTAAAACTCAAAGGAATTGACGGGTCCCCGCACAAGCGGCGGAGCATGCGGCTTAATTCGATGCAACCCGAAGAACCTTACCTGGGTTTGACATCATGGGAAAAGCCGTAGAAATACGGTGTCCGAAAGGGCCCATGACAGGTGGTGCATGGCTGTCGTCAGCTCGTGTCGTGAGATGTTGGGTTAAGTCCCGCAACGAGCGCAACCC	0	0	0	0	0	0	2	0	1	0	3	0.75	7	5	10	44	66	16.5	12	1	7	12	32	8	2
Actinomarinales_3	O	2	0	Aged_3_14991	99.387	99.0881	N	Actinomarinales	silva|KM313366.1.522	-	-	-	-	-	Bacteria	Actinobacteria	Actinomarinidae	Actinomarinales	Actinomarinales	Actinomarinales	Actinomarinales	Aged_1_146159;Compost_1_119598;Aged_3_14991;Aged_1_6972	GGCTTAGATACCCTGGTAGTCCACGCCGTAAACGTTGAACACTAGGTGTGGCGGATTTAATCACGTCTGCCGCGCCGTAGCTAACGCATTAAGTGTTCCGCCTGGGGAGTACGGCCGCAAGGCTAAAACTCAAAGGAATTGACGGGGCCCCGCACAAGCGGCGGAGCATGCGGCTTAATTCGATGATACCCGAAGAACCTTACCTGGACTTGAAATCATGGGTCTACCTGTGGAAACACAGGGTGCTTTGCGCCCATGACAGGTGGTGCATGGCTGTCGTCAGCTCGTGTCGTGAGATGTTGGGTTAAGTCCCGCAACGAGCGCAACCC	TAGATACCCGGGTAGTCCACGCCGTAAACGTTGAACACTAGGTGTGGCGGATATAATCACGTCTGCCGCGCCGTAGCTAACGCATTAAGTGTTCCGCCTGGGGAGTACGGCCGCAAGGCTAAAACTCAAAGGAATTGACGGGGGCCCCGCACAAGCGGCGGAGCATGCGGCTTAATTCGATGATACCCGAAGAACCTTACCTGGACTTGAAATCATGGGTCTACCTGTGGAAACACAGGGTGCTTTGCGCCCATGACAGGTGGTGCATGGCTGTCGTCAGCTCGTGTCGTGAGATGTTGGGTTAAGTCCCGCAACGAGCGCAACCC	0	0	0	0	0	0	0	0	0	0	0	0	4	7	3	5	19	4.75	31	45	55	41	172	43	13
Actinomarinales_4	O	1	0	Aged_1_115846	99.091	100	Y	Actinomarinales	silva|KT905795.1.1521	-	-	-	-	-	Bacteria	Actinobacteria	Actinomarinidae	Actinomarinales	Actinomarinales	Actinomarinales	Actinomarinales	Aged_1_115846	GGATTAGATACCCTGGTAGTCCACGCCGTAAACGTTGGATACTAGGTGTGGCGGTCTACCAACGACTGCCGTGCCGAAGCTAACGCATTAAGTATCCCGCCTGGGGAGTACGGCCGCAAGGCTAAAACTCAAAGGAATTGACGGGTCCCCGCACAAGCGGCGGAGCATGCGGCTTAATTCGATGCAACCCGAAGAACCTTACCTGGGCTTGACATCACGGGAAAAGCCGTAGAAATACGGTGTCCGTAAGGGCCCGTGACAGGTGGTGCATGGCTGTCGTCAGCTCGTGTCGTGAGATGTTGGGTTAAGTCCCGCAACGAGCGCAACCC	GGATTAGATACCCTGGTAGTCCACGCCGTAAACGTTGGATACTAGGTGTGGCGGTCTTACCAACGACTGCCGTGCCGAAGCTAACGCATTAAGTATCCCGCCTGGGGAGTACGGCCGCAAGGCTAAAACTCAAAGGAATTGACGGGTCCCCGCACAAGCGGCGGAGCATGCGGCTTAATTCGATGCAACCCGAAGAACCTTACCTGGGCTTGACATCACGGGAAAAGCTGTAGAAATACAGTGTCCGTAAGGGCCCGTGACAGGTGGTGCATGGCTGTCGTCAGCTCGTGTCGTGAGATGTTGGGTTAAGTCCCGCAACGAGCGCAACCC	0	0	0	0	0	0	0	1	0	1	2	0.5	2	3	1	1	7	1.75	24	47	52	65	188	47	18
Actinomycetales_1	O	1	0	Aged_1_108008	99.695	100	N	Actinomycetales	nt|AM935506.1	-	-	-	-	-	Bacteria	Actinobacteria	Actinobacteria	Actinomycetales	Actinomycetales	Actinomycetales	Actinomycetales	Aged_1_106357;Aged_2_143455;Aged_1_108008;Aged_1_126888;Aged_1_158917;Aged_2_55222;Aged_1_119677;Aged_1_154831	GGATTAGATACCCTGGTAGTCCTAGCCGTAAACGTTGGGTGCTAGGTGTGGGCGGATATCGACCCCGTCCGTGCCGAAGCTAACGCATTAAGCACCCCGCCTGGGGAGTACGGCCGCAAGGCTAAAACTCAAAGGAATTGACGGGGCCCCGCACAAGCGGCGGAGCATGCTGCTTAATTCGATGCAACGCGAAGAACCTTACCTGGGTTTGACATGCAGGGTGAAACCCGTGAAAGCGGGCGCTCTTCGGAGCCTGCACAGGTGGTGCATGGCTGTCGTCAGCTCGTGCCGTGAGGTGTTGCCTTAAGTGGCGCAACGAGCGCAACCC	GGATTAGATACCCTGGTAGTCCTAGCCGTAAACGTTGGGTGCTAGGTGTGGGCGGATATCGACCCCGTCCGTGCCGAAGCTAACGCATTAAGCACCCCGCCTGGGGAGTACGGCCGCAAGGCTAAAACTCAAAGGAATTGACGGGGCCCCGCACAAGCGGCGGAGCATGCGGCTTAATTCGATGCAACGCGAAGAACCTTACCTGGGTTTGACATGCAGGGTGAAACCCGTGAAAGCGGGCGCTCTTCGGAGCCTGCACAGGTGGTGCATGGCTGTCGTCAGCTCGTGCCGTGAGGTGTTGCCTTAAGTGGCGCAACGAGCGCAACCC	0	0	0	0	0	0	0	0	0	0	0	0	3	0	0	0	3	0.75	29	7	18	27	81	20.25	19
Actinomycetales_2	O	1	0	Aged_1_143644	99.699	100	N	Actinomycetales	nt|KJ834259.1	-	-	-	-	-	Bacteria	Actinobacteria	Actinobacteria	Actinomycetales	Actinomycetales	Actinomycetales	Actinomycetales	Aged_1_107920;Aged_1_113163;Aged_1_143644;Aged_1_118425;Aged_2_101302;Aged_1_138223;Aged_1_11286;Aged_1_115903	GGATTAGATACCCTGGTAGTCCACGCCGTAAACGATGGGCGCTAGGTGTTGGGGGGAGCGACCCCCTCGGTGCCGAAGCTAACGCGATAAGCGCCCCGCCTGGGGAGTACGGCCGCAAGGCTGAAACTCAAAGGAATTGACGGGGGCCCGCACAAGCGGTGGAGCATGTGGTTTAATTCGAAGCAACGCGAAGAACCTTACCTGGGCTTGACATGCACGTGAAAGCCTCTGGAAACAGGGGCCCTCCTTCGGGACGCGTGCACAGGTGCTGCATGGCTGTCGTCAGCTCGTGTCGTGAGATGTTGGGTTAAGTCCCGCAACGAGCGCAACCC	GGATTAGATACCCTGGTAGTCCACGCCGTAAACGATGGGCGCTAGGTGTTGGGGGGAGCGACCCCCTCGGTGCCGAAGCTAACGCGATAAGCGCCCCGCCTGGGGAGTACGGCCGCAAGGCTGAAACTCAAAGGAATTGACGGGGGCCCGCACAAGCGGTGGAGCATGTGGTTTAATTCGAAGCAACGCGAAGAACCTTACCTGGGCTTGACATGCACGTGAAAGCCTCTGGAAACAGGGGCCCTCCTTCGGGACGCGTGCACAGGTGCTGCATGGCTGTTGTCAGCTCGTGTCGTGAGATGTTGGGTTAAGTCCCGCAACGAGCGCAACCC	0	0	0	0	0	0	0	0	0	0	0	0	0	0	0	0	0	0	5	10	46	30	91	22.75	16
Actinomycetales_3	O	1	0	Aged_1_113069	99.392	100	N	Actinomycetales	rdp|S000931826	-	-	-	-	-	Bacteria	Actinobacteria	Actinobacteria	Actinomycetales	Actinomycetales	Actinomycetales	Actinomycetales	Aged_1_134902;Aged_1_36915;Aged_1_113069;Aged_1_122551;Aged_1_133154;Aged_1_118295;Aged_2_121913;Aged_1_116078	GGATTAGATACCCTGGTAGTCCACGCTGTAAACGATGGGTGCTAGGTGTGGGGGGTTATCGACTCCTTCCGTGCCGTAGCTAACGCAGTAAGCACCCCGCCTGGGGAGTACGGCCGCAAGGCTAAAACTCAAAGGAATTGACGGGGGCCCGCACAAGCGGCGGAGCATGTTGCTTAATTCGATGCAACGCGAAGAACCTTACCAGGGCTTGACATGCAGGGAAAAGCCGCAGAGATGTGGTGTCCGTAAGGGCCCTGCACAGGTGTTGCATGGCTGTCGTCAGCTCGTGTCGTGAGATGTTGGGTTAAGTCCCGCAACGAGCGCAACCC	GGATTAGATACCCTGGTAGTCCACGCTGTAAACGATGGGTGCTAGGTGTGGGGGGTTATCGACTCCTTCCGTGCCGCAGCTAACGCAGTAAGCACCCCGCCTGGGGAGTACGGCCGCAAGGCTAAAACTCAAAGGAATTGACGGGGGCCCGCACAAGCGGCGGAGCATGTTGCTTAATTCGATGCAACGCGAAGAACCTTACCAGGGCTTGACATGCAGGGAAAAGCCGCAGAGATGTGGTGTCCGTAAGGGTCCTGCACAGGTGTTGCATGGCTGTCGTCAGCTCGTGTCGTGAGATGTTGGGTTAAGTCCCGCAACGAGCGCAACCC	0	0	0	0	0	0	0	0	0	1	1	0.25	0	1	0	0	1	0.25	25	20	36	15	96	24	0
Actinotalea_fermentans_1	S	1	0	Aged_1_62440	99.696	100	N	Actinotalea_fermentans	16SMicrobial|NR_026176.1	Actinotalea_fermentans	0	Actinotalea_fermentans	nt|AB639014.1	99.696/100.0	Bacteria	Actinobacteria	Actinobacteria	Micrococcales	Cellulomonadaceae	Actinotalea	Actinotalea_fermentans	Aged_1_147936;Aged_2_119520;Aged_1_108645;Aged_1_107172;Aged_2_120566;Aged_2_35181;Aged_1_62440;Aged_2_124105	GGCTTAGATACCCTGGTAGTCCATGCCGTAAACGTTGGGCACTAGGTGTGGGGCTCATTCCACGAGCTCCGTGCCGCAGCTAACGCATTAAGTGCCCCGCCTGGGGAGTACGGCCGCAAGGCTAAAACTCAAAGGAATTGACGGGGGCCCGCACAAGCGGCGGAGCATGCGGATTAATTCGATGCAACGCGAAGAACCTTACCAAGGCTTGACATATACCGAAAACTCGTGGAGACACGGGGTCCGCAAGGGCGGTATACAGGTGGTGCATGGTTGTCGTCAGCTCGTGTCGTGAGATGTTGGGTTAAGTCCCGCAACGAGCGCAACCC	GGATTAGATACCCTGGTAGTCCATGCCGTAAACGTTGGGCACTAGGTGTGGGGCTCATTCCACGAGTTCCGTGCCGCAGCTAACGCATTAAGTGCCCCGCCTGGGGAGTACGGCCGCAAGGCTAAAACTCAAAGGAATTGACGGGGGCCCGCACAAGCGGCGGAGCATGCGGATTAATTCGATGCAACGCGAAGAACCTTACCAAGGCTTGACATATACCGAAAACTCGTGGAGACACGGGGTCCGCAAGGGCGGTATACAGGTGGTGCATGGTTGTCGTCAGCTCGTGTCGTGAGATGTTGGGTTAAGTCCCGCAACGAGCGCAACCC	0	0	0	0	0	0	0	0	0	0	0	0	0	0	0	3	3	0.75	43	36	36	52	167	41.75	47
Actinotalea_ferrariae_1	S	1	0	Compost_1_106949	100	100	N	Actinotalea_ferrariae	16SMicrobial|NR_118034.1	Actinotalea_MS	2	Actinotalea_fermentans;Actinotalea_ferrariae	nt|GQ497905.1;nt|KT021826.1;silva|AXCW01000345.2189.3382;silva|JF505966.1.1398	100.0/100.0	Bacteria	Actinobacteria	Actinobacteria	Micrococcales	Cellulomonadaceae	Actinotalea	Actinotalea_ferrariae	Compost_1_106949;Compost_1_107015;Compost_1_108953	GGATTAGATACCCTGGTAGTCCATGCCGTAAACGTTGGGCACTAGGTGTGGGGCTCATTCCACGAGTTCCGTGCCGCAGCAAACGCATTAAGTGCCCCGCCTGGGGAGTACGGCCGCAAGGCTAAAACTCAAAGGAATTGACGGGGGCCCGCACAAGCGGCGGAGCATGCGGATTAATTCGATGCAACGCGAAGAACCTTACCAAGGCTTGACATATACCGAAAACTCATGGAGACATGGGGTCCGCAAGGGCGGTATACAGGTGGTGCATGGTTGTCGTCAGCTCGTGTCGTGAGATGTTGGGTTAAGTCCCGCAACGAGCGCAACCC	GGATTAGATACCCTGGTAGTCCATGCCGTAAACGTTGGGCACTAGGTGTGGGGCTCATTCCACGAGTTCCGTGCCGCAGCAAACGCATTAAGTGCCCCGCCTGGGGAGTACGGCCGCAAGGCTAAAACTCAAAGGAATTGACGGGGGCCCGCACAAGCGGCGGAGCATGCGGATTAATTCGATGCAACGCGAAGAACCTTACCAAGGCTTGACATATACCGAAAACTCATGGAGACATGGGGTCCGCAAGGGCGGTATACAGGTGGTGCATGGTTGTCGTCAGCTCGTGTCGTGAGATGTTGGGTTAAGTCCCGCAACGAGCGCAACCC	0	0	0	0	0	0	0	0	0	0	0	0	0	0	0	0	0	0	42	8	15	21	86	21.5	8
Aeribacillus_MS_1	S	1	2	Aged_1_100370	100	100	N	Aeribacillus_composti;Aeribacillus_pallidus	16SMicrobial|NR_026515.1;16SMicrobial|NR_159152.1	Bacillaceae_MS	3	Aeribacillus_composti;Aeribacillus_pallidus;Bacillus_licheniformis	nt|AB198976.1;nt|KF879225.1;nt|NR_159152.1;silva|AB198976.1.1409	100.0/100.0	Bacteria	Firmicutes	Bacilli	Bacillales	Bacillaceae	Aeribacillus	Aeribacillus_MS	Aged_1_104730;Aged_2_125430;Aged_1_100370;Aged_1_119462;Aged_2_124325;Aged_1_83124;Aged_1_101617;Aged_1_134600	GGATTAGATACCCTGGTAGTCCACGCCGTAAACGATGAGTGCTAAGTGTTAGAGGGTATCCACCCTTTAGTGCTGCAGCAAACGCATTAAGCACTCCGCCTGGGGAGTACGGCCGCAAGGCTGAAACTCAAAGGAATTGACGGGGACCCGCACAAGCGGTGGAGCATGTGGTTTAATTCGAAGCAACGCGAAGAACCTTACCAGGTCTTGACATCCCCTGACAACCCTAGAGATAGGGCGTTCCCCTTTCGGGGACAGGGTGACAGGTGGTGCATGGTTGTCGTCAGCTCGTGTCGTGAGATGTTGGGTTAAGTCCCGCAACGAGCGCAACCC	GGATTAGATACCCTGGTAGTCCACGCCGTAAACGATGAGTGCTAAGTGTTAGAGGGTATCCACCCTTTAGTGCTGCAGCAAACGCATTAAGCACTCCGCCTGGGGAGTACGGCCGCAAGGCTGAAACTCAAAGGAATTGACGGGGACCCGCACAAGCGGTGGAGCATGTGGTTTAATTCGAAGCAACGCGAAGAACCTTACCAGGTCTTGACATCCCCTGACAACCCTAGAGATAGGGCGTTCCCCTTTCGGGGACAGGGTGACAGGTGGTGCATGGTTGTCGTCAGCTCGTGTCGTGAGATGTTGGGTTAAGTCCCGCAACGAGCGCAACCC	57	5	11	58	131	32.75	249	201	257	106	813	203.25	21	29	19	8	77	19.25	53	14	25	68	160	40	30
Aerococcaceae_MG_1	G	1	2	Compost_1_105053	99.394	100	N	Facklamia;Ignavigranum	rdp|S001915594;silva|FJ672433.1.1408	-	-	-	-	-	Bacteria	Firmicutes	Bacilli	Lactobacillales	Aerococcaceae	Aerococcaceae_MG	Aerococcaceae_MG	Compost_1_105053	GGCTTAGATACCCTGGTAGTCCACGCCGTAAACGATGAGTGCTAAGTGTTGGGGGGCTTCCACCCCTCAGTGCTGGCGTTAACGCAATAAGCACTCCGCCTGGGGAGTACGGCCGCAAGGCTGAAACTCAAAGGAATTGACGGGGACCCGCACAAGCGGTGGAGCATGTGGTTTAATTCGAAGCAACGCGAAGAACCTTACCAGGACTTGACATCTGATGCATACCCTAGAGATAGGCGAAATTCTTCGGAACATCAAGACAGGTGGTGCATGGTTGTCGTCAGCTCGTGTCGTGAGATGTTGGGTTAAGTCCCGCAACGAGCGCAACCC	GGATTAGATACCCTGGTAGTCCACGCCGTAAACGATGAGTGCTAAGTGTTGGGGGGCTTCCACCCCTCAGTGCTGGCGTTAACGCAATAAGCACTCCGCCTGGGGAGTACGGCCGCAAGGCTGAAACTCAAAGGAATTGACGGGGACCCGCACAAGCGGTGGAGCATGTGGTTTAATTCGAAGCAACGCGAAGAACCTTACCAGGACTTGACATCTGATGCATAACCTAGAGATAGGTGAAATTCTTCGGAACATCAAGACAGGTGGTGCATGGTTGTCGTCAGCTCGTGTCGTGAGATGTTGGGTTAAGTCCCGTAACGAGCGCAACCC	0	0	0	0	0	0	0	0	0	0	0	0	2	0	2	11	15	3.75	82	101	81	127	391	97.75	35
Aerococcaceae_MG_2	G	1	2	Compost_4_113016	100	100	N	Facklamia;Ignavigranum	rdp|S004580638;silva|KR514363.1.1472	-	-	-	-	-	Bacteria	Firmicutes	Bacilli	Lactobacillales	Aerococcaceae	Aerococcaceae_MG	Aerococcaceae_MG	Litter_3_41012;Compost_4_113016	GGCTTAGATACCCTGGTAGTCCACGCCGTAAACGATGAGTGCTAAGTGTTGGGAGGCTTCCACCTCTCAGTGCTGGCGTTAACGCAATAAGCACTCCGCCTGGGGAGTACGGCCGCAAGGCTGAAACTCAAAGGAATTGACGGGGACCCGCACAAGCGGTGGAGCATGTGGTTTAATTCGAAGCAACGCGAAGAACCTTACCAGGACTTGACATCTGATGCATAACCTAGAGATAGGTGAAATTCTTCGGAACATCAAGACAGGTGGTGCATGGTTGTCGTCAGCTCGTGTCGTGAGATGTTGGGTTAAGTCCCGTAACGAGCGCAACCC	GGATTAGATACCCTGGTAGTCCACGCCGTAAACGATGAGTGCTAAGTGTTGGGAGGCTTCCACCTCTCAGTGCTGGCGTTAACGCAATAAGCACTCCGCCTGGGGAGTACGGCCGCAAGGCTGAAACTCAAAGGAATTGACGGGGACCCGCACAAGCGGTGGAGCATGTGGTTTAATTCGAAGCAACGCGAAGAACCTTACCAGGACTTGACATCTGATGCATAACCTAGAGATAGGTGAAATTCTTCGGAACATCAAGACAGGTGGTGCATGGTTGTCGTCAGCTCGTGTCGTGAGATGTTGGGTTAAGTCCCGTAACGAGCGCAACCC	0	0	0	0	0	0	13	10	40	40	103	25.75	6	14	4	5	29	7.25	29	3	3	9	44	11	2
Aerococcus_urinaeequi_1	S	1	0	Aged_1_94939	100	100	N	Aerococcus_urinaeequi	16SMicrobial|NR_043443.1	Lactobacillales_MS	4	Aerococcus_urinae;Aerococcus_urinaeequi;Aerococcus_viridans;Enterococcus_italicus	nt|AB680259.1;nt|AB680271.1;nt|KC634299.1;nt|KY608156.1;silva|ADNT01000041.30.1567;silva|CP013988.1362826.1364383;silva|KC634299.1.1225	100.0/100.0	Bacteria	Firmicutes	Bacilli	Lactobacillales	Aerococcaceae	Aerococcus	Aerococcus_urinaeequi	Litter_1_22430;Litter_2_101642;Aged_1_94939;Aged_4_79655;Litter_2_89096;Aged_2_146046;Litter_1_146802	GGATTAGATACCCTGGTAGTCCACGCCGTAAACGATGAGTGCTAGGTGTTGGAGGGTTTCCGCCCTTCAGTGCCGCAGTTAACGCATTAAGCACTCCGCCTGGGGAGTACGACCGCAAGGTTGAAACTCAAAGGAATTGACGGGGACCCGCACAAGCGGTGGAGCATGTGGTTTAATTCGAAGCAACGCGAAGAACCTTACCAAGTCTTGACATCCTTTGACCACCCTAGAGATAGGGCTTTCCCTTCGGGGACAAAGTGACAGGTGGTGCATGGTTGTCGTCAGCTCGTGTCGTGAGATGTTGGGTTAAGTCCCGCAACGAGCGCAACCC	GGATTAGATACCCTGGTAGTCCACGCCGTAAACGATGAGTGCTAGGTGTTGGAGGGTTTCCGCCCTTCAGTGCCGCAGTTAACGCATTAAGCACTCCGCCTGGGGAGTACGACCGCAAGGTTGAAACTCAAAGGAATTGACGGGGACCCGCACAAGCGGTGGAGCATGTGGTTTAATTCGAAGCAACGCGAAGAACCTTACCAAGTCTTGACATCCTTTGACCACCCTAGAGATAGGGCTTTCCCTTCGGGGACAAAGTGACAGGTGGTGCATGGTTGTCGTCAGCTCGTGTCGTGAGATGTTGGGTTAAGTCCCGCAACGAGCGCAACCC	0	0	0	0	0	0	6	0	1	3	10	2.5	4	6	11	7	28	7	14	43	23	3	83	20.75	5
Aeromicrobium_MS_1	S	1	4	Litter_1_103224	100	100	N	Aeromicrobium_choanae;Aeromicrobium_halocynthiae;Aeromicrobium_marinum;Aeromicrobium_ponti	16SMicrobial|NR_025681.1;16SMicrobial|NR_042659.1;16SMicrobial|NR_104488.1;16SMicrobial|NR_156062.1	Aeromicrobium_MS	6	Aeromicrobium_alkaliterrae;Aeromicrobium_choanae;Aeromicrobium_halocynthiae;Aeromicrobium_kwangyangensis;Aeromicrobium_marinum;Aeromicrobium_ponti	nt|EF693740.1;nt|KY775506.1;nt|LT796768.1;nt|MK106261.1;nt|NR_025681.1;nt|NR_104488.1;silva|ACLF03000003.151326.152832;silva|AM778683.1.1396;silva|EF693740.1.1412;silva|FJ042789.1.1358;silva|KY775506.1.1376;silva|LN887956.1.1488	100.0/100.0	Bacteria	Actinobacteria	Actinobacteria	Propionibacteriales	Nocardioidaceae	Aeromicrobium	Aeromicrobium_MS	Litter_1_103431;Litter_1_100965;Litter_1_101817;Litter_1_130622;Litter_1_162409;Litter_1_103224;Litter_1_123866	GGCTTAGATACCCTGGTAGTCCATGCCGTAAACGTTGGGCGCTAGGTGTGGGGACCTTCCACGGTCTCCGTGCCGCAGCTAACGCATTAAGCGCCCCGCCTGGGGAGTACGGCCGCAAGGCTAAAACTCAAAGGAATTGACGGGGGCCCGCACAAGCGGCGGAGCATGCTGATTAATTCGATGCAACGCGAAGAACCTTACCTGGGTTTGACATATACCGGAAAGCTGCAGAGATGTAGCCCCCCTTGTGGTCGGTATACAGGTGGTGCATGGCTGTCGTCAGCTCGTGTCGTGAGATGTTGGGTTAAGTCCCGCAACGAGCGCAACCC	GGATTAGATACCCTGGTAGTCCATGCCGTAAACGTTGGGCGCTAGGTGTGGGGACCTTCCACGGTCTCCGTGCCGCAGCTAACGCATTAAGCGCCCCGCCTGGGGAGTACGGCCGCAAGGCTAAAACTCAAAGGAATTGACGGGGGCCCGCACAAGCGGCGGAGCATGCTGATTAATTCGATGCAACGCGAAGAACCTTACCTGGGTTTGACATATACCGGAAAGCTGCAGAGATGTAGCCCCCCTTGTGGTCGGTATACAGGTGGTGCATGGCTGTCGTCAGCTCGTGTCGTGAGATGTTGGGTTAAGTCCCGCAACGAGCGCAACCC	0	0	0	0	0	0	2	0	3	0	5	1.25	0	2	9	3	14	3.5	35	16	28	120	199	49.75	1
Aggregicoccus_1	G	1	0	Aged_3_111705	100	100	N	Aggregicoccus	rdp|S001566916	-	-	-	-	-	Bacteria	Proteobacteria	Deltaproteobacteria	Myxococcales	Myxococcaceae	Aggregicoccus	Aggregicoccus	Aged_3_111705;Aged_3_99789	GGATTAGATACCCTGGTAGTCCACGCTGTAAACGATGAGAACTAGGTGTCGTGGGTGTTGACCCCCGCGGTGCCGCAGCTAACGCATTAAGTTCTCCGCCTGGGAAGTACGGCCGCAAGGCTAAAACTCAAAGGAATTGACGGGGGCCCGCACAAGCGGTGGAGCATGTGGTTTAATTCGACGCAACGCGCAGAACCTTACCCAGACTTGACATCTATCAAACCCGGCCCAAAAGCTGGGGTGCCCGCAAGGGAATGGTAAGACAGGTGCTGCATGGCTGTCGTCAGCTCGTGTCGTGAGATGTTGGGTTAAGTCCCGCAACGAGCGCAACCC	GGATTAGATACCCTGGTAGTCCACGCTGTAAACGATGAGAACTAGGTGTCGTGGGTGTTGACCCCCGCGGTGCCGCAGCTAACGCATTAAGTTCTCCGCCTGGGAAGTACGGCCGCAAGGCTAAAACTCAAAGGAATTGACGGGGGCCCGCACAAGCGGTGGAGCATGTGGTTTAATTCGACGCAACGCGCAGAACCTTACCCAGACTTGACATCTATCAAACCCGGCCCAAAAGCTGGGGTGCCCGCAAGGGAATGGTAAGACAGGTGCTGCATGGCTGTCGTCAGCTCGTGTCGTGAGATGTTGGGTTAAGTCCCGCAACGAGCGCAACCC	13	4	0	4	21	5.25	42	19	28	62	151	37.75	46	36	48	28	158	39.5	8	3	5	6	22	5.5	9
Agromyces_lapidis_1	S	1	0	Compost_1_139294	99.396	100	N	Agromyces_lapidis	16SMicrobial|NR_043028.1	Agromyces_MS	5	Agromyces_allii;Agromyces_aurantiacus;Agromyces_binzhouensis;Agromyces_lapidis;Agromyces_neolithicus	nt|JF682057.1;nt|KX502929.1;nt|KX792245.1;nt|MK110483.1;nt|MK128486.1;silva|AY618217.1.1470;silva|JF682057.1.1175;silva|KX502929.1.1393;silva|KX792245.1.1275	99.396/100.0	Bacteria	Actinobacteria	Actinobacteria	Micrococcales	Microbacteriaceae	Agromyces	Agromyces_lapidis	Compost_1_139294;Compost_1_28419	GGATTAGATACCCTGGTAGTCCACGCCGTAAACGTTGGGCGCTAGATGTGGGGACCTTTCCACGGTTTCCGTGTCGTAGCTAACGCATTAAGCGCCCCGCCTGGGGAGTACGGCCGCAAGGCTAAAACTCAAAGGAATTGACGGGGGCCCGCACAAGCGGCGGAGCATGCGGATTAATTCGATGCAACGCGAAGAACCTTACCAAGGCTTGACATGACCGAGAACGCTCTAGAAATAGAGAACTCTTTGGACACTCGGTTACAGGTGGTGCATGGTTGTCGTCAGCTCGTGTCGTGAGATGTTGGGTTAAGTCCCGCAACGAGCGCAACCC	GGATTAGATACCCTGGTAGTCCACGCCGTAAACGTTGGGCGCTAGATGTGGGGACCTTTCCACGGTTTCCGTGTCGTAGCTAACGCATTAAGCGCCCCGCCTGGGGAGTACGGCCGCAAGGCTAAAACTCAAAGGAATTGACGGGGGCCCGCACAAGCGGCGGAGCATGCGGATTAATTCGATGCAACGCGAAGAACCTTACCAAGGCTTGACATGACCGAGAACGCCCTAGAAATAGGGAACTCTTTGGACACTCGGTTACAGGTGGTGCATGGTTGTCGTCAGCTCGTGTCGTGAGATGTTGGGTTAAGTCCCGCAACGAGCGCAACCC	0	0	0	0	0	0	0	0	0	0	0	0	0	0	0	0	0	0	29	15	37	103	184	46	68
Agromyces_ulmi_1	S	1	0	Aged_2_55513	99.396	100	N	Agromyces_ulmi	silva|KF557657.1.1460	-	-	-	-	-	Bacteria	Actinobacteria	Actinobacteria	Micrococcales	Microbacteriaceae	Agromyces	Agromyces_ulmi	Aged_2_55513;Aged_2_39465	GGATTAGATACCCTGGTAGTCCACGCCGTAAACGTTGGGCGCTAGATGTGGGGACCTTTCCACGGTTTCCGTGTCGTAGCTAACGCATTAAGCGCCCCGCCTGGGGAGTACGGCCGCAAGGCTAAAACTCAAAGGAATTGACGGGGGCCCGCACAAGCGGCGGAGCATGCGGATTAATTCGATGCAACGCGAAGAACCTTACCAAGGCTTGACATACACCAGAACACGCTAGAGATAGCGGACTCTTTGGACACTGGTGTACAGGTGGTGCATGGTTGTCGTCAGCTCGTGTCGTGAGATGTTGGGTTAAGTCCCGCAACGAGCGCAACCC	GGATTAGATACCCTGGTAGTCCACGCCGTAAACGTTGGGCGCTAGATGTGGGGACCTTTCCACGGTTTCCGTGTCGTAGCTAACGCATTAAGCGCCCCGCCTGGGGAGTACGGCCGCAAGGCTAAAACTCAAAGGAATTGACGGGGGCCCGCACAAGCGGCGGAGCATGCGGATTAATTCGATGCAACGCGAAGAACCTTACCAAGGCTTGACATACACCAGAACGCGCTAGAGATAGCGAACTCTTTGGACACTGGTGTACAGGTGGTGCATGGTTGTCGTCAGCTCGTGTCGTGAGATGTTGGGTTAAGTCCCGCAACGAGCGCAACCC	0	0	0	0	0	0	1	0	0	0	1	0.25	8	8	5	9	30	7.5	29	39	37	36	141	35.25	4
Alcaligenaceae_1	F	1	0	Aged_1_115444	99.398	100	N	Alcaligenaceae	nt|AM935974.1	-	-	-	-	-	Bacteria	Proteobacteria	Betaproteobacteria	Burkholderiales	Alcaligenaceae	Alcaligenaceae	Alcaligenaceae	Aged_1_115845;Aged_1_78815;Aged_1_115444;Aged_1_135909;Aged_1_121695;Aged_1_12250;Aged_1_112620;Aged_1_102586	GGATTAGATACCCTGGTAGTCCACGCCCTAAACTATGTCGACTGGTTGTTGGGGGAGTCTGTCCCTCAGTAACGTAGCTAACGCGTGAAGTCGACCGCCTGGGGAGTACGGTCGCAAGATTAAAACTCAAAGGAATTGACGGGGACCCGCACAAGCGGTGGATTATGTGGATTAATTCGATGCAACGCGAAGAACCTTACCTACCCTTGACATGCCAGGAACCCCGCAGAGATGTGGGGGTGCCCGAAAGGGAACCTGGACACAGGTGCTGCATGGCTGTCGTCAGCTCGTGTCGTGAGATGTTGGGTTAAGTCCCGCAACGAGCGCAACCC	GGATTAGATACCCTGGTAGTCCACGCCCTAAACTATGTCGACTAGTTGTTGGGGGAGTCTGTCCCTCAGTAACGTAGCTAACGCGTGAAGTCGACCGCCTGGGGAGTACGGTCGCAAGATTAAAACTCAAAGGAATTGACGGGGACCCGCACAAGCGGTGGATTATGTGGATTAATTCGATGCAACGCGAAGAACCTTACCTACCCTTGACATGCCAGGAACCCCGCAGAGATGCGGGGGTGCCCGAAAGGGAACCTGGACACAGGTGCTGCATGGCTGTCGTCAGCTCGTGTCGTGAGATGTTGGGTTAAGTCCCGCAACGAGCGCAACCC	1	0	0	0	1	0.25	1	5	2	0	8	2	1	7	8	5	21	5.25	14	21	21	15	71	17.75	6
Alcaligenaceae_MS_1	S	1	8	Litter_1_142659	99.396	100	N	Achromobacter_marplatensis;Bordetella_avium;Candidimonas_bauzanensis;Eoetvoesia_caeni;Kerstersia_gyiorum;Orrella_dioscoreae;Pusillimonas_caeni;Pusillimonas_noertemannii	16SMicrobial|NR_025669.1;16SMicrobial|NR_041769.1;16SMicrobial|NR_043129.1;16SMicrobial|NR_108569.1;16SMicrobial|NR_117614.1;16SMicrobial|NR_125538.1;16SMicrobial|NR_146844.1;16SMicrobial|NR_160523.1	-	-	-	-	-	Bacteria	Proteobacteria	Betaproteobacteria	Burkholderiales	Alcaligenaceae	Alcaligenaceae_MS	Alcaligenaceae_MS	Litter_2_86684;Litter_1_142659;Litter_1_148753;Litter_1_113003;Litter_1_104670;Litter_1_115544	GGATTAGATACCCTGGTAGTCCACGCCCTAAACGATGTCAACTAGCTGTTGGGGCCTTCGGGCCTTAGTAGCGCAGCTAACGCGTGAAGTTGACCGCCTGGGGAGTACGGTCGCAAGATTAAAACTCAAAGGAATTGACGGGGACCCGCACAAGCGGTGGATGATGTGGATTAATTCGATGCAACGCGAAAAACCTTACCTACCCTTGACATGTCTGGAATCCTGAAGAGATTCGGGAGTGCTCGCAAGAGAACCGGAACACAGGTGCTGCATGGCTGTCGTCAGCTCGTGTCGTGAGATGTTGGGTTAAGTCCCGCAACGAGCGCAACCC	GGATTAGATACCCTGGTAGTCCACGCCCTAAACGATGTCAACTAGCTGTTGGGGCCTTCGGGCCTTAGTAGCGCAGCTAACGCGTGAAGTTGACCGCCTGGGGAGTACGGTCGCAAGATTAAAACTCAAAGGAATTGACGGGGACCCGCACAAGCGGTGGATGATGTGGATTAATTCGATGCAACGCGAAAAACCTTACCTACCCTTGACATGTCTGGAATCCCGAAGAGATTTGGGAGTGCTCGCAAGAGAACCGGAACACAGGTGCTGCATGGCTGTCGTCAGCTCGTGTCGTGAGATGTTGGGTTAAGTCCCGCAACGAGCGCAACCC	0	0	0	0	0	0	1	1	7	5	14	3.5	9	3	10	7	29	7.25	2	4	2	5	13	3.25	1
Alcaligenaceae_MS_2	S	1	3	Aged_3_110354	100	100	N	Bordetella_avium;Eoetvoesia_caeni;Kerstersia_gyiorum	16SMicrobial|NR_025669.1;16SMicrobial|NR_041769.1;16SMicrobial|NR_125538.1	Alcaligenaceae_MS	9	Achromobacter_marplatensis;Bordetella_avium;Bordetella_bronchiseptica;Bordetella_petrii;Bordetella_trematum;Castellaniella_denitrificans;Eoetvoesia_caeni;Kerstersia_gyiorum;Parapusillimonas_granuli	nt|AM167904.1;nt|CP016340.1;nt|HM117848.1;nt|KC634246.1;nt|KP233467.1;nt|KR338991.1;nt|KU744861.1;nt|NR_125538.1;silva|AF177666.1.1522;silva|AY131213.1.1414;silva|FJ948170.1.1453;silva|FKBR01000036.649.2167;silva|KM192261.1.1232;silva|KU744861.1.1460	100.0/100.0	Bacteria	Proteobacteria	Betaproteobacteria	Burkholderiales	Alcaligenaceae	Alcaligenaceae_MS	Alcaligenaceae_MS	Aged_3_132823;Aged_3_108578;Aged_3_110354;Aged_3_112945;Aged_3_135140;Aged_2_42093;Aged_2_84495;Aged_2_73737	GGATTAGATACCCTGGTAGTCCACGCCCTAAACGATGTCAACTAGCTGTTGGGGCCTTCGGGCCTTAGTAGCGCAGCTAACGCGTGAAGTTGACCGCCTGGGGAGTACGGTCGCAAGATTAAAACTCAAAGGAATTGACGGGGACCCGCACAAGCGGTGGATGATGTGGATTAATTCGATGCAACGCGAAAAACCTTACCTACCCTTGACATGTCTGGAATCCCGAAGAGATTTGGGAGTGCTCGCAAGAGAACCGGAACACAGGTGCTGCATGGCTGTCGTCAGCTCGTGTCGTGAGATGTTGGGTTAAGTCCCGCAACGAGCGCAACCC	GGATTAGATACCCTGGTAGTCCACGCCCTAAACGATGTCAACTAGCTGTTGGGGCCTTCGGGCCTTAGTAGCGCAGCTAACGCGTGAAGTTGACCGCCTGGGGAGTACGGTCGCAAGATTAAAACTCAAAGGAATTGACGGGGACCCGCACAAGCGGTGGATGATGTGGATTAATTCGATGCAACGCGAAAAACCTTACCTACCCTTGACATGTCTGGAATCCCGAAGAGATTTGGGAGTGCTCGCAAGAGAACCGGAACACAGGTGCTGCATGGCTGTCGTCAGCTCGTGTCGTGAGATGTTGGGTTAAGTCCCGCAACGAGCGCAACCC	4	0	1	0	5	1.25	23	1	18	45	87	21.75	10	20	30	10	70	17.5	13	1	3	0	17	4.25	3
Alcaligenaceae_MS_3	S	1	3	Litter_1_158039	100	100	N	Orrella_dioscoreae;Pusillimonas_caeni;Pusillimonas_noertemannii	16SMicrobial|NR_043129.1;16SMicrobial|NR_146844.1;16SMicrobial|NR_160523.1	Alcaligenaceae_MS	3	Orrella_dioscoreae;Pusillimonas_caeni;Pusillimonas_noertemannii	nt|JX966649.1;nt|LT907988.1;nt|NR_146844.1;silva|AMZF01000048.3857.5377;silva|FLRC01000046.3862.5393;silva|KF056995.1.1444	100.0/100.0	Bacteria	Proteobacteria	Betaproteobacteria	Burkholderiales	Alcaligenaceae	Alcaligenaceae_MS	Alcaligenaceae_MS	Litter_1_165793;Litter_1_158039	GGCTTAGATACCCTGGTAGTCCACGCCCTAAACGATGTCAACTAGCTGTTGGGGCCTTCGGGCCTTAGTAGCGCAGCTAACGCGTGAAGTTGACCGCCTGGGGAGTACGGTCGCAAGATTAAAACTCAAAGGAATTGACGGGGACCCGCACAAGCGGTGGATGATGTGGATTAATTCGATGCAACGCGAAAAACCTTACCTACCCTTGACATGTCTGGAATCCTGAAGAGATTTAGGAGTGCTCGCAAGAGAACCGGAACACAGGTGCTGCATGGCTGTCGTCAGCTCGTGTCGTGAGATGTTGGGTTAAGTCCCGCAACGAGCGCAACCC	GGATTAGATACCCTGGTAGTCCACGCCCTAAACGATGTCAACTAGCTGTTGGGGCCTTCGGGCCTTAGTAGCGCAGCTAACGCGTGAAGTTGACCGCCTGGGGAGTACGGTCGCAAGATTAAAACTCAAAGGAATTGACGGGGACCCGCACAAGCGGTGGATGATGTGGATTAATTCGATGCAACGCGAAAAACCTTACCTACCCTTGACATGTCTGGAATCCTGAAGAGATTTAGGAGTGCTCGCAAGAGAACCGGAACACAGGTGCTGCATGGCTGTCGTCAGCTCGTGTCGTGAGATGTTGGGTTAAGTCCCGCAACGAGCGCAACCC	0	0	0	0	0	0	5	7	3	0	15	3.75	10	9	11	25	55	13.75	170	213	159	193	735	183.75	93
Alistipes_1	G	1	0	Compost_1_160856	100	100	N	Alistipes	nt|KM108662.1	-	-	-	-	-	Bacteria	Bacteroidetes	Bacteroidia	Bacteroidales	Rikenellaceae	Alistipes	Alistipes	Compost_1_160856	GGATTAGATACCCTGGTAGTCCACACTGTAAACGATGATTACTCGCTGCTGGGAGGTAACTTTCAGTGGCTGAGCGAAAGCGATAAGTAATCCACCTGGGGAGTACGCCGGCAACGGTGAAACTCAAAGGAATTGACGGGGGCCCGCACAAGCGGAGGAGCATGTGGTTTAATTCGATGATACGCGAGGAACCTTACCAGGGCTTGAAAGTTAGTGACCGACTCTGAAAGGAGTCTTCCCGCAAGGGCACAAAACTAGGTGCTGCATGGCTGTCGTCAGCTCGTGCCGTGAGGTGTTGGGTTAAGTCCCGCAACGAGCGCAACCC	GGATTAGATACCCTGGTAGTCCACACTGTAAACGATGATTACTCGCTGCTGGGAGGTAACTTTCAGTGGCTGAGCGAAAGCGATAAGTAATCCACCTGGGGAGTACGCCGGCAACGGTGAAACTCAAAGGAATTGACGGGGGCCCGCACAAGCGGAGGAGCATGTGGTTTAATTCGATGATACGCGAGGAACCTTACCAGGGCTTGAAAGTTAGTGACCGACTCTGAAAGGAGTCTTCCCGCAAGGGCACAAAACTAGGTGCTGCATGGCTGTCGTCAGCTCGTGCCGTGAGGTGTTGGGTTAAGTCCCGCAACGAGCGCAACCC	0	0	0	0	0	0	8	9	50	39	106	26.5	22	19	10	12	63	15.75	17	6	8	5	36	9	10
Alkaliphilus_1	G	1	0	Aged_2_52537	99.085	99.696	N	Alkaliphilus	rdp|S004382177;silva|KM332796.1.544	-	-	-	-	-	Bacteria	Firmicutes	Clostridia	Clostridiales	Clostridiaceae	Alkaliphilus	Alkaliphilus	Aged_1_131742;Aged_2_52537;Aged_1_26297	GGATTAGATACCCTGGTAGTCCACACCGTAAACGATGAGCGCTAGGTGTTGGGGGTCGAACCTCAGTGCCGCAGCTAACGCATTAAGCGCTCCGCCTGGGGAGTACGCACGCAAGTGTGAAACTCAAAGGAATTGACGGGGACCCGCACAAGCAGCGGAGCATGTGGTTTAATTCGAAGCAACGCGAAGAACCTTACCTGGGCTTGACATCCCTCTGACCGCTCCTTAACCGGAGCCTTCCCTTCGGGGACAGAGGTGACAGGTGGTGCATGGTTGTCGTCAGCTCGTGTCGTGAGATGTTGGGTTAAGTCCCGCAACGAGCGCAACCC	TAGATACCCGGGTAGTCCACACCCGTAAAACGATGAGCGCTAGGTGTTGGGGGGTCGAACCTCAGTGCCGCAGCTAACGCATTAAGCGCTCCGCCTGGGGAGTACGCACGCAAGTGTGAAACTCAAAGGAATTGACGGGGACCCGCACAAGCAGCGGAGCATGTGGTTTAATTCGAAGCAACGCGAAGAACCTTACCTGGGCTTGACATCCCTCTGACCGCTCCTTAACCGGAGCCTTCCCTTCGGGGACAGAGGTGACAGGTGGTGCATGGTTGTCGTCAGCTCGTGTCGTGAGATGTTGGGTTAAGTCCCGCAACGAGCGCAACCC	0	0	0	0	0	0	0	0	0	0	0	0	0	0	0	0	0	0	42	2	9	23	76	19	11
Alkaliphilus_oremlandii_1	S	1	0	Litter_2_100342	99.088	100	N	Alkaliphilus_oremlandii	16SMicrobial|NR_074435.1	Alkaliphilus_oremlandii	0	Alkaliphilus_oremlandii	nt|CP000853.1;silva|CP000853.11368.12872	99.088/100.0	Bacteria	Firmicutes	Clostridia	Clostridiales	Clostridiaceae	Alkaliphilus	Alkaliphilus_oremlandii	Litter_2_100342	GGATTAGATACCCTGGTAGTCCACGCCGTAAACGATGAGTGCTAGGTGTCGGGGGTCGAACCTCGGTGCCGCAGTTAACGCATTAAGCACTCCGCCTGGGGAGTACGTACGCAAGTATGAAACTCAAAGGAATTGACGGGGACCCGCACAAGCAGCGGAGCATGTGGTTTAATTCGAAGCAACGCGAAGAACCTTACCTGGACTTGACATCCCTCTGACCGATTCTTAACCGAATCCTTCCCTTCGGGGACAGAGGTGACAGGTGGTGCATGGTTGTCGTCAGCTCGTGTCGTGAGATGTTGGGTTAAGTCCCGCAACGAGCGCAACCC	GGATTAGATACCCTGGTAGTCCACGCCGTAAACGATGAGTGCTAGGTGTTGGGGGTCGAACCTCGGTGCCGAAGTTAACGCATTAAGCACTCCGCCTGGGGAGTACGTACGCAAGTATGAAACTCAAAGGAATTGACGGGGACCCGCACAAGCAGCGGAGCATGTGGTTTAATTCGAAGCAACGCGAAGAACCTTACCTGGACTTGACATCCCTCTGACCGATTCTTAACCGAATCCTTCCCTTCGGGGACAGAGGAGACAGGTGGTGCATGGTTGTCGTCAGCTCGTGTCGTGAGATGTTGGGTTAAGTCCCGCAACGAGCGCAACCC	0	0	0	0	0	0	3	4	1	0	8	2	14	15	8	8	45	11.25	13	4	11	17	45	11.25	14
Allokutzneria_1	G	1	0	Aged_1_149114	100	100	N	Allokutzneria	silva|KJ834286.1.762	-	-	-	-	-	Bacteria	Actinobacteria	Actinobacteria	Pseudonocardiales	Pseudonocardiaceae	Allokutzneria	Allokutzneria	Aged_1_157279;Aged_1_105419;Aged_2_29396;Aged_1_149114;Aged_1_6189	GGCTTAGATACCCTGGTAGTCCACGCCGTAAACGTTGGGCGCTAGGTGTGGGGGGCTTTCCACGTCCTCCGTGCCGTAGCTAACGCATTAAGCGCCCCGCCTGGGGAGTACGGCCGCAAGGCTAAAACTCAAAGGAATTGACGGGGGCCCGCACAAGCGGCGGAGCATGTGGATTAATTCGATGCAACGCGAAGAACCTTACCTGGGCTTGACATACACCAGACGCCGGCAGAGATGTCGGTTCCCTTGTGGTTGGTGTACAGGTGGTGCATGGCTGTCGTCAGCTCGTGTCGTGAGATGTTGGGTTAAGTCCCGCAACGAGCGCAACCC	GGATTAGATACCCTGGTAGTCCACGCCGTAAACGTTGGGCGCTAGGTGTGGGGGGCTTTCCACGTCCTCCGTGCCGTAGCTAACGCATTAAGCGCCCCGCCTGGGGAGTACGGCCGCAAGGCTAAAACTCAAAGGAATTGACGGGGGCCCGCACAAGCGGCGGAGCATGTGGATTAATTCGATGCAACGCGAAGAACCTTACCTGGGCTTGACATACACCAGACGCCGGCAGAGATGTCGGTTCCCTTGTGGTTGGTGTACAGGTGGTGCATGGCTGTCGTCAGCTCGTGTCGTGAGATGTTGGGTTAAGTCCCGCAACGAGCGCAACCC	0	0	0	0	0	0	0	0	0	0	0	0	0	1	0	0	1	0.25	4	2	16	11	33	8.25	29
Alphaproteobacteria_1	C	1	0	Aged_1_157556	99.696	100	N	Alphaproteobacteria	rdp|S001031624;silva|EU656602.1.550	-	-	-	-	-	Bacteria	Proteobacteria	Alphaproteobacteria	Alphaproteobacteria	Alphaproteobacteria	Alphaproteobacteria	Alphaproteobacteria	Aged_1_157556;Compost_1_109644	GGATTAGATACCCTGGTAGTCCACGCCGTAAACGATGAGTGCTAGGCGTCGGCAGGCTTGCCTGTCGGTGCCGCAGCTAACGCGTGAAGCACTCCGCCTGGGGAGTACGGTCGCAAGATTAAAACTCAAAGGAATTGACGGGGGCCCGCACAAGCGGTGGAGCATGTGGTTTAATTCGACGCAACGCGCAGAACCTTACCAGCCCTTGACATGCCGTGCCATGCGCAGAGATGCGCAGTTCCAGCAATGGACGCGGACACAGGTGCTGCATGGCTGTCGTCAGCTCGTGTCGTGAGATGTTGGGTTAAGTCCCGCAACGAGCGCAACCC	GGATTAGATACCCTGGTAGTCCACGCCGTAAACGATGAGTGCTAGGCGTCGGCAGGCTTGCCTGTCGGTGCCGCAGCTAACGCGTGAAGCACTCCGCCTGGGGAGTACGGTCGCAAGATTAAAACTCAAAGGAATTGACGGGGGCCCGCACAAGCGGTGGAGCATGTGGTTTAATTCGACGCAACGCGCAGAACCTTACCAGCCCTTGACATGCCGTGCTATGCGCAGAGATGCGCAGTTCCAGCAATGGACGCGGACACAGGTGCTGCATGGCTGTCGTCAGCTCGTGTCGTGAGATGTTGGGTTAAGTCCCGCAACGAGCGCAACCC	8	1	2	8	19	4.75	14	0	3	2	19	4.75	45	38	21	68	172	43	237	152	169	159	717	179.25	142
Alphaproteobacteria_2	C	1	0	Aged_1_42779	99.399	100	N	Alphaproteobacteria	rdp|S003552327;silva|JQ825071.1.1479	-	-	-	-	-	Bacteria	Proteobacteria	Alphaproteobacteria	Alphaproteobacteria	Alphaproteobacteria	Alphaproteobacteria	Alphaproteobacteria	Aged_1_130645;Aged_1_134056;Aged_1_42779;Aged_1_147868;Aged_1_114474	GGATTAGATACCCTGGTAGTCCACGCCGTAAACGATGAGTGCTAGATGTCGGGGGGCTTGCCTCTCGGTGTCGCCGCTAACGCATTAAGCACTCCGCCTGGGGAGTACGGCCGCAAGGTTAAAACTCAAAGGAATTGACGGGGGCCCGCACAAGCGGTGGAGCATGTGGTTTAATTCGACGCAACGCGCAGAACCTTACCAGCCCTTGACATCCCCATCGCGGCCTGTGGAGACACGGGCCTTCAGTTCGGCTGGATGGGAGACAGGTGCTGCATGGCTGTCGTCAGCTCGTGTCGTGAGATGTTGGGTTAAGTCCCGCAACGAGCGCGACCC	GGATTAGATACCCTGGTAGTCCACGCCGTAAACGATGAGTGCTAGATGTCGGGGGGCTTGCCTCTCGGTGTCGCCGCTAACGCATTAAGCACTCCGCCTGGGGAGTACGGCCGCAAGGTTAAAACTCAAAGGAATTGACGGGGGCCCGCACAAGCGGTGGAGCATGTGGTTTAATTCGACGCAACGCGCAGAACCTTACCAGCCCTTGACATCCCCATCGCGGCCCGTGGAGACGCGGGCCTTCAGTTCGGCTGGATGGGAGACAGGTGCTGCATGGCTGTCGTCAGCTCGTGTCGTGAGATGTTGGGTTAAGTCCCGCAACGAGCGCAACCC	2	0	0	0	2	0.5	0	0	0	0	0	0	1	0	0	3	4	1	51	55	76	86	268	67	30
Alphaproteobacteria_3	C	1	0	Aged_3_15499	99.102	100	N	Alphaproteobacteria	rdp|S004421403;silva|LN565639.1.1323	-	-	-	-	-	Bacteria	Proteobacteria	Alphaproteobacteria	Alphaproteobacteria	Alphaproteobacteria	Alphaproteobacteria	Alphaproteobacteria	Litter_1_110011;Aged_3_15499;Litter_1_117426;Litter_1_125549;Litter_1_111190;Litter_1_132489	GGATTAGATACCCTGGTAGTCCACGCCGTAAACGATGAGTGCTAGATGTTGGGGTCCTTAGGGCTTCAGTGTCGCAGCTAACGCATTAAGCACTCCGCCTGGGGAGTACGGCCGCAAGGTTAAAACTCAAAGGAATTGACGGGGGCCCGCACAAGCGGTGGAGCATGTGGTTTAATTCGAAGCAACGCGCAGAACCTTACCAGCCCTTGACATCCCGGTCGCGGTTACCAGAGATGGTTTCCTTCAGTTCGGCTGGACCGGAGACAGGTGCTGCATGGCTGTCGTCAGCTCGTGTCGTGAGATGTTGGGTTAAGTCCCGCAACGAGCGCAACCC	GGATTAGATACCCTGGTAGTCCACGCCGTAAACGATGAGTGCTAGATGTTGGGATCCTTAGGGTCTCAGTGTCGCAGCTAACGCATTAAGCACTCCGCCTGGGGAGTACGGCCGCAAGGTTAAAACTCAAAGGAATTGACGGGGGCCCGCACAAGCGGTGGAGCATGTGGTTTAATTCGAAGCAACGCGCAGAACCTTACCAGCCCTTGACATCCCGGTCGCGGTTACCAGAGATGGTTTCCTTCAGTTCGGCTGGACCGGAGACAGGTGCTGCATGGCTGTCGTCAGCTCGTGTCGTGAGATGTTGGGTTAAGTCCCGCAACGAGCGCAACCC	0	0	2	0	2	0.5	5	3	14	16	38	9.5	1	6	7	3	17	4.25	7	2	5	1	15	3.75	2
Alphaproteobacteria_MF_1	F	1	2	Aged_1_100455	99.401	100	N	Kiloniellaceae;Rhodospirillaceae	rdp|S004418239;silva|LN562472.1.1324	-	-	-	-	-	Bacteria	Proteobacteria	Alphaproteobacteria	Alphaproteobacteria_MF	Alphaproteobacteria_MF	Alphaproteobacteria_MF	Alphaproteobacteria_MF	Aged_1_114646;Aged_1_20533;Aged_1_100455;Aged_1_103061;Aged_1_64535;Aged_1_118279;Aged_1_133850;Aged_1_129879	GGATTAGATACCCTGGTAGTCCACGCCGTAAACGATGAGTGCTAGACGTTGGGGGGCGTAGCCTTCCAGTGTCGCAGCTAACGCACTAAGCACTCCGCCTGGGGAGTACGGCCGCAAGGTTAAAACTCAAAGGAATTGACGGGGGCCCGCACAAGCGGTGGAGCATGTGGTTTAATTCGAAGCAACGCGCAGAACCTTACCAACCCTTGACATCCCGGTCGCGGGACCCAGAGATGGGTTCCTTCAGTTCGGCTGGACCGGAGACAGGTGCTGCATGGCTGTCGTCAGCTCGTGTCGTGAGATGTTGGGTTAAGTCCCGCAACGAGCGCAACCC	GGATTAGATACCCTGGTAGTCCACGCCGTAAACGATGAGTGCTAGACGTTGGGGGGCGTAGCCTTCCAGTGTCGCAGCTAACGCACTAAGCACTCCGCCTGGGGAGTACGGCCGCAAGGTTAAAACTCAAAGGAATTGACGGGGGCCCGCACAAGCGGTGGAGCATGTGGTTTAATTCGAAGCAACGCGCAGAACCTTACCAACCCTTGACATCCCGGTCGCGGGACCCAGAGACGGGTCCCTTCAGTTCGGCTGGACCGGAGACAGGTGCTGCATGGCTGTCGTCAGCTCGTGTCGTGAGATGTTGGGTTAAGTCCCGCAACGAGCGCAACCC	1	0	3	0	4	1	131	33	81	242	487	121.75	288	240	290	342	1160	290	85	43	31	76	235	58.75	59
Altererythrobacter_1	G	1	0	Aged_4_113078	99.399	100	N	Altererythrobacter	rdp|S001407268;silva|FJ889319.1.1442	-	-	-	-	-	Bacteria	Proteobacteria	Alphaproteobacteria	Sphingomonadales	Erythrobacteraceae	Altererythrobacter	Altererythrobacter	Aged_1_23758;Aged_4_113078;Aged_3_49539;Compost_1_135526;Aged_4_173548	GGATTAGATACCCTGGTAGTCCACGCCGTAAACGATGATAACTAGCTGTCCGGGCTCATGGAGCTTGGGTGGCGCAGCTAACGCATTAAGTTATCCGCCTGGGGAGTACGGCCGCAAGGTTAAAACTCAAAGGAATTGACGGGGGCCTGCACAAGCGGTGGAGCATGTGGTTTAATTCGAAGCAACGCGCAGAACCTTACCAGCCTTTGACATGCCTAGTATGGTTTCCAGAGATGGATTCCTTGTCTTCGGACGCTAGGACACAGGTGCTGCATGGCTGTCGTCAGCTCGTGTCGTGAGATGTTGGGTTAAGTCCCGCAACGAGCGCAACCC	GGATTAGATACCCTGGTAGTCCACGCCGTAAACGATGATAACTAGCTGTCCGGGCTCATGGAGCTTGGGTGGCGCAGCTAACGCATTAAGTTATCCGCCTGGGGAGTACGGTCGCAAGATTAAAACTCAAAGGAATTGACGGGGGCCTGCACAAGCGGTGGAGCATGTGGTTTAATTCGAAGCAACGCGCAGAACCTTACCAGCCTTTGACATGCCTAGTATGGTTTCCAGAGATGGATTCCTTGTCTTCGGACGCTAGGACACAGGTGCTGCATGGCTGTCGTCAGCTCGTGTCGTGAGATGTTGGGTTAAGTCCCGCAACGAGCGCAACCC	0	0	0	0	0	0	0	0	3	0	3	0.75	3	1	10	6	20	5	28	50	40	35	153	38.25	8
Altererythrobacter_2	G	1	0	Litter_1_11493	100	100	N	Altererythrobacter	rdp|S001917571;silva|FJ672494.1.1344	-	-	-	-	-	Bacteria	Proteobacteria	Alphaproteobacteria	Sphingomonadales	Erythrobacteraceae	Altererythrobacter	Altererythrobacter	Litter_1_11493	GGATTAGATACCCTGGTAGTCCACGCCGTAAACGATGATAACTAGCTGTCCGGGCACATGGTGCTTGGGTGGCGCAGCTAACGCATTAAGTTATCCGCCTGGGGAGTACGGTCGCAAGATTAAAACTCAAAGGAATTGACGGGGGCCTGCACAAGCGGTGGAGCATGTGGTTTAATTCGAAGCAACGCGCAGAACCTTACCAGCCTTTGACATCCTAGGACGGTTTCCAGAGATGGATTCCTTCCCTTCGGGGACCTAGTGACAGGTGCTGCATGGCTGTCGTCAGCTCGTGTCGTGAGATGTTGGGTTAAGTCCCGCAACGAGCGCAACCC	GGATTAGATACCCTGGTAGTCCACGCCGTAAACGATGATAACTAGCTGTCCGGGCACATGGTGCTTGGGTGGCGCAGCTAACGCATTAAGTTATCCGCCTGGGGAGTACGGTCGCAAGATTAAAACTCAAAGGAATTGACGGGGGCCTGCACAAGCGGTGGAGCATGTGGTTTAATTCGAAGCAACGCGCAGAACCTTACCAGCCTTTGACATCCTAGGACGGTTTCCAGAGATGGATTCCTTCCCTTCGGGGACCTAGTGACAGGTGCTGCATGGCTGTCGTCAGCTCGTGTCGTGAGATGTTGGGTTAAGTCCCGCAACGAGCGCAACCC	0	0	0	0	0	0	4	0	8	6	18	4.5	9	6	14	5	34	8.5	43	46	62	97	248	62	105
Altererythrobacter_3	G	1	0	Litter_1_162438	100	100	N	Altererythrobacter	rdp|S003307033;silva|AB695739.1.1411	-	-	-	-	-	Bacteria	Proteobacteria	Alphaproteobacteria	Sphingomonadales	Erythrobacteraceae	Altererythrobacter	Altererythrobacter	Litter_2_106350;Litter_1_162438;Litter_1_141785	GGATTAGATACCCTGGTAGTCCACGCCGTAAACGATGAGAACTAGCTGTCCGGGCACATGGTGCTTGGGTGGCGCAGCTAACGCATTAAGTTCTCCGCCTGGGGAGTACGGTCGCAAGATTAAAACTCAAAGGAATTGACGGGGGCCTGCACAAGCGGTGGAGCATGTGGTTTAATTCGAAGCAACGCGCAGAACCTTACCAGCCTTTGACATCCCGGTCGCGATTTCCAGAGATGGATTTCTTCAGTTCGGCTGGACCGGTGACAGGTGCTGCATGGCTGTCGTCAGCTCGTGTCGTGAGATGTTGGGTTAAGTCCCGCAACGAGCGCGACCC	GGATTAGATACCCTGGTAGTCCACGCCGTAAACGATGAGAACTAGCTGTCCGGGCACATGGTGCTTGGGTGGCGCAGCTAACGCATTAAGTTCTCCGCCTGGGGAGTACGGTCGCAAGATTAAAACTCAAAGGAATTGACGGGGGCCTGCACAAGCGGTGGAGCATGTGGTTTAATTCGAAGCAACGCGCAGAACCTTACCAGCCTTTGACATCCCGGTCGCGATTTCCAGAGATGGATTTCTTCAGTTCGGCTGGACCGGTGACAGGTGCTGCATGGCTGTCGTCAGCTCGTGTCGTGAGATGTTGGGTTAAGTCCCGCAACGAGCGCAACCC	0	0	0	0	0	0	0	0	0	0	0	0	0	0	2	1	3	0.75	34	15	50	28	127	31.75	26
Altererythrobacter_4	G	1	0	Compost_1_181739	100	100	N	Altererythrobacter	silva|FQ658507.1.1308	-	-	-	-	-	Bacteria	Proteobacteria	Alphaproteobacteria	Sphingomonadales	Erythrobacteraceae	Altererythrobacter	Altererythrobacter	Compost_1_103147;Compost_1_132311;Compost_1_181739;Compost_1_98974	GGCTTAGATACCCTGGTAGTCCACGCCGTAAACGATGATAACTAGCTGTCCGAGCTCATGGAGTTTGGGTGGCGCAGCTAACGCATTAAGTTATCCGCCTGGGGAGTACGGTCGCAAGATTAAAACTCAAAGGAATTGACGGGGGCCTGCACAAGCGGTGGAGCATGTGGTTTAATTCGAAGCAACGCGCAGAACCTTACCAGCCTTTGACATCCCGGTCGCGGTTTCCAGAGATGGATTCCTTCAGTTCGGCTGGACCGGTGACAGGTGCTGCATGGCTGTCGTCAGCTCGTGTCGTGAGATGTTGGGTTAAGTCCCGCAACGAGCGCAACCC	GGATTAGATACCCTGGTAGTCCACGCCGTAAACGATGATAACTAGCTGTCCGAGCTCATGGAGTTTGGGTGGCGCAGCTAACGCATTAAGTTATCCGCCTGGGGAGTACGGTCGCAAGATTAAAACTCAAAGGAATTGACGGGGGCCTGCACAAGCGGTGGAGCATGTGGTTTAATTCGAAGCAACGCGCAGAACCTTACCAGCCTTTGACATCCCGGTCGCGGTTTCCAGAGATGGATTCCTTCAGTTCGGCTGGACCGGTGACAGGTGCTGCATGGCTGTCGTCAGCTCGTGTCGTGAGATGTTGGGTTAAGTCCCGCAACGAGCGCAACCC	0	0	0	0	0	0	0	0	0	0	0	0	0	0	0	0	0	0	19	21	40	19	99	24.75	5
Altererythrobacter_ishigakiensis_1	S	1	0	Compost_1_120619	99.701	100	N	Altererythrobacter_ishigakiensis	nt|KT758458.1	-	-	-	-	-	Bacteria	Proteobacteria	Alphaproteobacteria	Sphingomonadales	Erythrobacteraceae	Altererythrobacter	Altererythrobacter_ishigakiensis	Compost_1_153860;Compost_2_124909;Compost_1_120619	GGCTTAGATACCCTGGTAGTCCACGCCGTAAACGATGATAACTAGCTGTCCGGGCTCATGGAGCTTGGGTGGCGCAGCTAACGCATTAAGTTATCCGCCTGGGGAGTACGGTCGCAAGATTAAAACTCAAAGGAATTGACGGGGGCCTGCACAAGCGGTGGAGCATGTGGTTTAATTCGAAGCAACGCGCAGAACCTTACCAGCCTTTGACATCCTGGTCGCGGTTAGAGGAGACTCTTTCCTTCAGTTCGGCTGGACCAGTGACAGGTGCTGCATGGCTGTCGTCAGCTCGTGTCGTGAGATGTTGGGTTAAGTCCCGCAACGAGCGCAACCC	GGATTAGATACCCTGGTAGTCCACGCCGTAAACGATGATAACTAGCTGTCCGGGCTCATAGAGCTTGGGTGGCGCAGCTAACGCATTAAGTTATCCGCCTGGGGAGTACGGTCGCAAGATTAAAACTCAAAGGAATTGACGGGGGCCTGCACAAGCGGTGGAGCATGTGGTTTAATTCGAAGCAACGCGCAGAACCTTACCAGCCTTTGACATCCTGGTCGCGGTTAGAGGAGACTCTTTCCTTCAGTTCGGCTGGACCAGTGACAGGTGCTGCATGGCTGTCGTCAGCTCGTGTCGTGAGATGTTGGGTTAAGTCCCGCAACGAGCGCAACCC	0	0	0	0	0	0	0	1	1	0	2	0.5	0	2	2	0	4	1	34	33	41	51	159	39.75	60
Alterococcus_1	G	2	0	Aged_1_37380	99.701	100	N	Alterococcus	rdp|S004418549;silva|LN562782.1.1394	-	-	-	-	-	Bacteria	Verrucomicrobia	Opitutae	Opitutales	Opitutaceae	Alterococcus	Alterococcus	Aged_1_37380	GGCTTAGATACCCCTGTAGTCCACGCCCTAAACGGTGCGTACTAGGTGTTGGCGGAATCGACCCCGCCAGTGCCCAAGCTAACGCGATAAGTACGCCGCCTGAGGACTACGGCCGCAAGGCTAAAACTCAAAGGAATTGACGGGGGCCCGCACAAGCGGTGGAGCATGTGGCTTAATTCGATGCAACGCGAAGAACCTTACCTGGCCTTGACATGCATGTGGTAGGAGCCTGAAAGGGCGACGACCCCGCAAGGGGAGCATGCACAGGTGCTGCATGGCTGTCGTCAGCTCGTGTCGTGAGATGTTTGGTTAAGTCCAGCAACGAGCGCAACCC	GGATTAGATACCCCTGTAGTCCACGCCCTAAACGGTGCGTACTAGGTGTTGGCGGAATCGACCCCGCCAGTGCCCAAGCTAACGCGATAAGTACGCCGCCTGAGGACTACGGCCGCAAGGCTAAAACTCAAAGGAATTGACGGGGGCCCGCACAAGCGGTGGAGCATGTGGCTTAATTCGATGCAACGCGAAGAACCTTACCTGGCCTTGACATGCATGTGGTAGGAGCCTGAAAGGGCAACGACCCCGCAAGGGGAGCATGCACAGGTGCTGCATGGCTGTCGTCAGCTCGTGTCGTGAGATGTTTGGTTAAGTCCAGCAACGAGCGCAACCC	0	0	0	0	0	0	0	0	0	0	0	0	0	1	0	1	2	0.5	150	189	163	216	718	179.5	75
Amaricoccus_1	G	1	0	Litter_1_108288	100	100	N	Amaricoccus	rdp|S000932052	-	-	-	-	-	Bacteria	Proteobacteria	Alphaproteobacteria	Rhodobacterales	Rhodobacteraceae	Amaricoccus	Amaricoccus	Litter_1_140315;Litter_1_177579;Litter_1_108288	GGCTTAGATACCCTGGTAGTCCACGCCGTAAACGATGAGAGCCAGACGTCGGGCGGCTTGCCGTTCGGTGTCGCAGTTAACGCATTAAGCTCTCCGCCTGGGGAGTACGGCCGCAAGGTTAAAACTCAAAGGAATTGACGGGGGCCCGCACAAGCGGTGGAGCATGTGGTTTAATTCGAAGCAACGCGCAGAACCTTACCATCCCTTGACTTGCCCGTCGCGGGCCGGGAGACCGGTCCTTCAGTTCGGCTGGACGGTGCACAGGTGCTGCATGGCTGTCGTCAGCTCGTGTCGTGAGATGTTGGGTTAAGTCCCGCAACGAGCGCGACCC	GGATTAGATACCCTGGTAGTCCACGCCGTAAACGATGAGAGCCAGACGTCGGGCGGCTTGCCGTTCGGTGTCGCAGTTAACGCATTAAGCTCTCCGCCTGGGGAGTACGGCCGCAAGGTTAAAACTCAAAGGAATTGACGGGGGCCCGCACAAGCGGTGGAGCATGTGGTTTAATTCGAAGCAACGCGCAGAACCTTACCATCCCTTGACTTGCCCGTCGCGGGCCGGGAGACCGGTCCTTCAGTTCGGCTGGACGGTGCACAGGTGCTGCATGGCTGTCGTCAGCTCGTGTCGTGAGATGTTGGGTTAAGTCCCGCAACGAGCGCAACCC	1	0	0	0	1	0.25	18	13	82	442	555	138.75	23	38	20	5	86	21.5	9	60	35	98	202	50.5	52
Amaricoccus_2	G	1	0	Aged_1_111814	99.695	99.0937	N	Amaricoccus	rdp|S004378851	-	-	-	-	-	Bacteria	Proteobacteria	Alphaproteobacteria	Rhodobacterales	Rhodobacteraceae	Amaricoccus	Amaricoccus	Aged_1_111814	GGATTAGATACCCTGGTAGTCCACGCCGTAAACTATGAGAGCTAGTCGTCGGGCAGCATGCTGTTCGGTGACGCAGCTAACGCATTAAGCTCTCCGCCTGGGGAGTACGGCCGCAAGGTTAAAACTCAAAGGAATTGACGGGGGCCCGCACAAGCGGTGGAGCATGTGGTTTAATTCGAAGCAACGCGCAGAACCTTACCATCCCTTGACTTGTCGGTCGCGGCCCGTGAAAGCGGGCTTTCAGTTCGGCTGGACCGAACACAGGTGCTGCATGGCTGTCGTCAGCTCGTGTCGTGAGATGTTGGGTTAAGTCCCGCAACGAGCGCAACCC	TAGATACCCGGGTAGTCCACGCCGTAAACTATGAGAGCTAGTCGTCGGGCAGCATGCTGTTCGGTGACGCAGCTAACGCATTAAGCTCTCCGCCTGGGGAGTACGGCCGCAAGGTTAAAACTCAAAGGAATTGACGGGGGGCCCGCACAAGCGGTGGAGCATGTGGTTTAATTCGAAGCAACGCGCAGAACCTTACCATCCCTTGACTTGTCGGTCGCGGCCCGTGAAAGCGGGCTTTCAGTTCGGCTGGACCGAACACAGGTGCTGCATGGCTGTCGTCAGCTCGTGTCGTGAGATGTTGGGTTAAGTCCCGCAACGAGCGCAACCC	0	0	0	0	0	0	1	0	1	0	2	0.5	3	3	4	6	16	4	9	6	10	5	30	7.5	10
Aminicenantales_1	O	1	0	Aged_1_119164	100	100	N	Aminicenantales	silva|AB011351.1.621	-	-	-	-	-	Bacteria	Acidobacteria	Aminicenantia	Aminicenantales	Aminicenantales	Aminicenantales	Aminicenantales	Aged_1_116849;Aged_1_104224;Aged_1_119164;Aged_1_13823;Aged_1_110587;Aged_1_155317	GGATTAGATACCCCGGTAGTCCTAGCCGTAAACGATGGACACTAGATATTCCGGCGTTTTCGCTGGAGTGTCGTAGCTAACGCGTTAAGTGTCCCGCCTGGGGAGTACGGTCGCAAGGCTGAAACTCAAAGGAATTGACGGGGGCCCGCACAAGCGGTGGAGCATGTGGTTTAATTCGACGCTACGCGAAGAACCTTACCTGGGCTTGAACTGCTGGAGGTAGGAGCCCGAAAGGGTAACGACCCGGAGCAATCCGGGAACCAGCAGAGGTGCTGCATGGCTGTCGTCAGCTCGTGTCGTGAGATGTTGGGTTAAGTCCCGCAACGAGCGCGACCC	GGATTAGATACCCCGGTAGTCCTAGCCGTAAACGATGGACACTAGATATTCCGGCGTTTTCGCTGGAGTGTCGTAGCTAACGCGTTAAGTGTCCCGCCTGGGGAGTACGGTCGCAAGGCTGAAACTCAAAGGAATTGACGGGGGCCCGCACAAGCGGTGGAGCATGTGGTTTAATTCGACGCTACGCGAAGAACCTTACCTGGGCTTGAACTGCTGGAGGTAGGAGCCCGAAAGGGTAACGACCCGGAGCAATCCGGGAACCAGCAGAGGTGCTGCATGGCTGTCGTCAGCTCGTGTCGTGAGATGTTGGGTTAAGTCCCGCAACGAGCGCAACCC	50	67	51	57	225	56.25	13	85	29	15	142	35.5	24	28	15	2	69	17.25	19	13	11	22	65	16.25	14
Aminicenantales_2	O	1	0	Middle_2_14016	99.405	100	N	Aminicenantales	silva|AF402984.1.1457	-	-	-	-	-	Bacteria	Acidobacteria	Aminicenantia	Aminicenantales	Aminicenantales	Aminicenantales	Aminicenantales	Middle_2_14016;Middle_4_109535;Middle_4_10199	GGATTAGATACCCCGGTAGTCCTAGCCGTAAACGATGGGCACTAGATATTCCGGCGTTTTCGCTGGAGTGTCGTAGCTAACGCGTTAAGTGCCCCGCCTGGGGAGTACGGTCGCAAGGCTGAAACTCAAAGGAATTGACGGGGGCCCGCACAAGCGGTGGAGCATGTGGTTTAATTCGACGCTACGCGAAGAACCTTACCTGGGCTTGAACTGCTGGTGGTAGGAGCCCGAAAGGGTGACGACCCCGAGCAATCGGGGAGCCAGCAGAGGTGCTGCATGGCTGTCGTCAGCTCGTGTCGTGAGATGTTGGGTTAAGTCCCGCAACGAGCGCAACCC	GGATTAGATACCCCGGTAGTCCTAGCCGTAAACGATGGGCACTAGATATTCCGGCGTTTTCGCTGGAGTGTCGTAGCTAACGCGTTAAGTGCCCCGCCTGGGGAGTACGGTCGCAAGGCTGAAACTCAAAGGAATTGACGGGGGCCCGCACAAGCGGTGGAGCATGTGGTTTAATTCGACGCTACGCGAAGAACCTTACCTGGGCTTGAACTGCTGGTGGTAGGAGCCCGAAAGGGTGACGACCCGGAGCAATCCGGGAGCCAGCAGAGGTGCTGCATGGCTGTCGTCAGCTCGTGTCGTGAGATGTTGGGTTAAGTCCCGCAACGAGCGCAACCC	0	0	0	0	0	0	10	0	0	1	11	2.75	38	15	30	36	119	29.75	265	317	400	377	1359	339.75	189
Aminicenantales_3	O	1	0	Middle_4_100036	100	100	N	Aminicenantales	silva|AY862534.1.1328	-	-	-	-	-	Bacteria	Acidobacteria	Aminicenantia	Aminicenantales	Aminicenantales	Aminicenantales	Aminicenantales	Aged_1_111318;Middle_4_100036;Middle_4_11109;Middle_4_105086;Middle_4_103872	GGATTAGATACCCCGGTAGTCCTAGCCGTAAACGATGGGCACTGGATATTCCGGCGTTTTCGCTGGAGTGTCGTAGCTAACGCGTTAAGTGCCCCGCCTGGGGAGTACGGCCGCAAGGTTGAAACTCAAAGGAATTGACGGGGGCCCGCACAAGCGGTGGAGCATGTGGTTTAATTCGACGCTACGCGAAGAACCTTACCTGGGCTTGAACTGCTGGTGGTAGGAGCCCGAAAGGGTGACGACCCGGAGCAATCCGGGAGCCAGCAGAGGTGCTGCATGGCTGTCGTCAGCTCGTGTCGTGAGATGTTGGGTTAAGTCCCGCAACGAGCGCAACCC	GGATTAGATACCCCGGTAGTCCTAGCCGTAAACGATGGGCACTGGATATTCCGGCGTTTTCGCTGGAGTGTCGTAGCTAACGCGTTAAGTGCCCCGCCTGGGGAGTACGGCCGCAAGGTTGAAACTCAAAGGAATTGACGGGGGCCCGCACAAGCGGTGGAGCATGTGGTTTAATTCGACGCTACGCGAAGAACCTTACCTGGGCTTGAACTGCTGGTGGTAGGAGCCCGAAAGGGTGACGACCCGGAGCAATCCGGGAGCCAGCAGAGGTGCTGCATGGCTGTCGTCAGCTCGTGTCGTGAGATGTTGGGTTAAGTCCCGCAACGAGCGCAACCC	49	488	14	34	585	146.25	85	58	43	60	246	61.5	66	83	52	43	244	61	15	61	32	71	179	44.75	26
Aminobacter_1	G	1	0	Litter_1_118213	99.091	99.0991	N	Aminobacter	silva|KM301305.1.511	-	-	-	-	-	Bacteria	Proteobacteria	Alphaproteobacteria	Rhizobiales	Phyllobacteriaceae	Aminobacter	Aminobacter	Litter_1_163771;Litter_1_118213;Litter_1_104451;Litter_1_108091;Litter_1_114008;Litter_1_163377	GGATTAGATACCCTGGTAGTCCACGCCGTAAACTATGAGAGCTAGCCGTCGGCATGCATGCATGTCGGTGGCGCAGCTAACGCATTAAGCTCTCCGCCTGGGGAGTACGGTCGCAAGATTAAAACTCAAAGGAATTGACGGGGGCCCGCACAAGCGGTGGAGCATGTGGTTTAATTCGAAGCAACGCGCAGAACCTTACCAGCCCTTGACATCCCGGTCGCGGTTACGAGAGATCGTTTCCTTCAGTTCGGCTGGACCGGTGACAGGTGCTGCATGGCTGTCGTCAGCTCGTGTCGTGAGATGTTGGGTTAAGTCCCGCAACGAGCGCAACCC	TAGATACCCGGGGTAGTCCACGCCGTAAACTATGAGAGCTAGCCGTCGGCAAGCATGCTTGTCGGTGGCGCAGCTAACGCATTAAGCTCTCCGCCTGGGGAGTACGGTCGCAAGATTAAAACTCAAAGGAATTGACGGGGGCCCGCACAAGCGGTGGAGCATGTGGTTTAATTCGAAGCAACGCGCAGAACCTTACCAGCCCTTGACATCCCGGTCGCGGTTACGAGAGATCGTTTCCTTCAGTTCGGCTGGACCGGTGACAGGTGCTGCATGGCTGTCGTCAGCTCGTGTCGTGAGATGTTGGGTTAAGTCCCGCAACGAGCGCAACCC	0	0	0	0	0	0	0	0	0	0	0	0	0	0	0	0	0	0	44	42	51	26	163	40.75	2
Ammoniibacillus_1	G	1	0	Aged_4_152136	100	100	N	Ammoniibacillus	rdp|S000937531	-	-	-	-	-	Bacteria	Firmicutes	Bacilli	Bacillales	Paenibacillaceae	Ammoniibacillus	Ammoniibacillus	Aged_1_96722;Litter_1_132163;Aged_4_152136;Aged_4_32834	GGCTTAGATACCCTGGTAGTCCACGCCGTAAACGATGAATGCTAGGTGTTAGGGGGGCTAGACCCCTTAGTGCCGAAGTTAACACATTAAGCATTCCGCCTGGGGAGTACGGTCGCAAGACTGAAACTCAAAGGAATTGACGGGGACCCGCACAAGCAGTGGAGCATGTGGTTTAATTCGAAGCAACGCGAAGAACCTTACCAGGTCTTGACATCCCGCTGACCGGCATAGAGATATGCCTTCCCTTCGGGGCAGCGGTGACAGGTGGTGCATGGTTGTCGTCAGCTCGTGTCGTGAGATGTTGGGTTAAGTCCCGCAACGAGCGCAACCC	GGATTAGATACCCTGGTAGTCCACGCCGTAAACGATGAATGCTAGGTGTTAGGGGGGCTAGACCCCTTAGTGCCGAAGTTAACACATTAAGCATTCCGCCTGGGGAGTACGGTCGCAAGACTGAAACTCAAAGGAATTGACGGGGACCCGCACAAGCAGTGGAGCATGTGGTTTAATTCGAAGCAACGCGAAGAACCTTACCAGGTCTTGACATCCCGCTGACCGGCATAGAGATATGCCTTCCCTTCGGGGCAGCGGTGACAGGTGGTGCATGGTTGTCGTCAGCTCGTGTCGTGAGATGTTGGGTTAAGTCCCGCAACGAGCGCAACCC	0	0	0	0	0	0	12	4	13	13	42	10.5	22	35	38	14	109	27.25	20	27	29	40	116	29	13
Ammoniibacillus_2	G	1	0	Aged_4_112649	100	100	N	Ammoniibacillus	rdp|S002161984;silva|FN667371.1.1499	-	-	-	-	-	Bacteria	Firmicutes	Bacilli	Bacillales	Paenibacillaceae	Ammoniibacillus	Ammoniibacillus	Aged_1_111055;Aged_4_112649;Aged_4_103950	GGATTAGATACCCTGGTAGTCCACGCCGTAAACGATGAATGCTAGGTGTCAGGGGTTTTGATACCTTTGGTGCCGAAGTTAACACAGTAAGCATTCCGCCTGGGGAGTACGCTCGCAAGAGTGAAACTCAAAGGAATTGACGGGGACCCGCACAAGCAGTGGAGCATGTGGTTTAATTCGAAGCAACGCGAAGAACCTTACCAGGTCTTGACATCCCGCTGACGGGTGCAGAGATGTGCCTTTCTCCTTTTGGGGACAGCGGAGACAGGTGGTGCATGGTTGTCGTCAGCTCGTGTCGTGAGATGTTGGGTTAAGTCCCGCAACGAGCGCAACCC	GGATTAGATACCCTGGTAGTCCACGCCGTAAACGATGAATGCTAGGTGTCAGGGGTTTTGATACCTTTGGTGCCGAAGTTAACACAGTAAGCATTCCGCCTGGGGAGTACGCTCGCAAGAGTGAAACTCAAAGGAATTGACGGGGACCCGCACAAGCAGTGGAGCATGTGGTTTAATTCGAAGCAACGCGAAGAACCTTACCAGGTCTTGACATCCCGCTGACGGGTGCAGAGATGTGCCTTTCTCCTTTTGGGGACAGCGGAGACAGGTGGTGCATGGTTGTCGTCAGCTCGTGTCGTGAGATGTTGGGTTAAGTCCCGCAACGAGCGCAACCC	0	0	0	0	0	0	2	0	0	0	2	0.5	1	1	0	1	3	0.75	24	41	58	35	158	39.5	10
Ammoniibacillus_agariperforans_1	S	1	0	Aged_1_109456	100	100	N	Ammoniibacillus_agariperforans	nt|AB745450.1;silva|AB745450.1.1523	-	-	-	-	-	Bacteria	Firmicutes	Bacilli	Bacillales	Paenibacillaceae	Ammoniibacillus	Ammoniibacillus_agariperforans	Aged_1_148555;Aged_1_18389;Aged_1_109456;Aged_1_152095;Aged_1_117474;Aged_1_96196;Aged_1_154095;Aged_1_117595	GGATTAGATACCCTGGTAGTCCACGCCGTAAACGATGAATGCTAGGTGTTAGGGAGCCCGATCTCCTTAGTGCCGAAGTTAACACATTAAGCATTCCGCCTGGGGAGTACGGCCGCAAGGCTGAAACTCAAAGGAATTGACGGGGACCCGCACAAGCAGTGGAGCATGTGGTTTAATTCGAAGCAACGCGAAGAACCTTACCAGGTCTTGACATCCCGCTGACCGGGCCAGAGATGGTCCTTTCCTTCGGGACAGCGGAGACAGGTGGTGCATGGTTGTCGTCAGCTCGTGTCGTGAGATGTTGGGTTAAGTCCCGCAACGAGCGCAACCC	GGATTAGATACCCTGGTAGTCCACGCCGTAAACGATGAATGCTAGGTGTTAGGGAGCCCGATCTCCTTAGTGCCGAAGTTAACACATTAAGCATTCCGCCTGGGGAGTACGGCCGCAAGGCTGAAACTCAAAGGAATTGACGGGGACCCGCACAAGCAGTGGAGCATGTGGTTTAATTCGAAGCAACGCGAAGAACCTTACCAGGTCTTGACATCCCGCTGACCGGGCCAGAGATGGTCCTTTCCTTCGGGACAGCGGAGACAGGTGGTGCATGGTTGTCGTCAGCTCGTGTCGTGAGATGTTGGGTTAAGTCCCGCAACGAGCGCAACCC	0	0	0	0	0	0	0	0	0	0	0	0	0	0	0	2	2	0.5	89	22	83	100	294	73.5	2
Ammoniphilus_oxalaticus_1	S	2	0	Aged_1_25152	100	100	N	Ammoniphilus_oxalaticus	16SMicrobial|NR_026432.1	Ammoniphilus_oxalaticus	0	-;Ammoniphilus_oxalaticus	-;nt|NR_026432.1;silva|Y14578.1.1497	-;100.0/100.0	Bacteria	Firmicutes	Bacilli	Bacillales	Paenibacillaceae	Ammoniphilus	Ammoniphilus_oxalaticus	Aged_2_132534;Aged_1_82797;Aged_1_25152;Aged_1_107414;Aged_1_108158;Aged_1_49923;Aged_1_66451	GGATTAGATACCCTGGTAGTCCACGCCGTAAACGATGAGTGCTAAGTGTCGGGGGTGACCAACCCTCGGTGCTGTCGCTAACGCAATAAGCACTCCGCCTGGGGAGTACGGCCGCAAGGCTGAAACTCAAAGGAATTGACGGGGACCCGCACAAGCGGTGGAGCATGTGGTTTAATTCGAAGCAACGCGAAGAACCTTACCAAGGCTTGACATCCCTCTGACCGATTTAGAGATAGATCTTTCCCTTCGGGGACAGAGGTGACAGGTGGTGCATGGTTGTCGTCAGCTCGTGTCGTGAGATGTTGGGTTAAGTCCCGCAACGAGCGCAACCC	GGATTAGATACCCTGGTAGTCCACGCCGTAAACGATGAGTGCTAAGTGTCGGGGGTGACCAACCCTCGGTGCTGTCGCTAACGCAATAAGCACTCCGCCTGGGGAGTACGGCCGCAAGGCTGAAACTCAAAGGAATTGACGGGGACCCGCACAAGCGGTGGAGCATGTGGTTTAATTCGAAGCAACGCGAAGAACCTTACCAAGGCTTGACATCCCTCTGACCGATTTAGAGATAGATCTTTCCCTTCGGGGACAGAGGTGACAGGTGGTGCATGGTTGTCGTCAGCTCGTGTCGTGAGATGTTGGGTTAAGTCCCGCAACGAGCGCAACCC	5	0	0	0	5	1.25	219	184	166	216	785	196.25	323	177	183	83	766	191.5	55	56	107	96	314	78.5	84
Ammoniphilus_resinae_1	S	3	0	Aged_1_104851	99.699	100	N	Ammoniphilus_resinae	16SMicrobial|NR_151898.1	Ammoniphilus_resinae	0	-;Ammoniphilus_resinae	-;nt|NR_151898.1	-;99.699/100.0	Bacteria	Firmicutes	Bacilli	Bacillales	Paenibacillaceae	Ammoniphilus	Ammoniphilus_resinae	Aged_1_127047;Aged_1_104851;Aged_1_37178;Aged_1_118899;Aged_1_47603	GGATTAGATACCCTGGTAGTCCACGCCGTAAACGATGAGTGCTAAGTGTCGGGGGTGACCAACCCTCGGTGCTGTCGCTAACGCAATAAGCACTCCGCCTGGGGAGTACGGCCGCAAGGCTGAAACTCAAAGGAATTGACGGGGACCCGCACAAGCGGTGGAGCATGTGGTTTAATTCGAAGCAACGCGAAGAACCTTACCAAGGCTTGACATCCCTCTGACCGGTCTAGAGATAGATCTTTCCCTTCGGGGACAGAGGTGACAGGTGGTGCATGGTTGTCGTCAGCTCGTGTCGTGAGATGTTGGGTTAAGTCCCGCAACGAGCGCAACCC	GGATTAGATACCCTGGTAGTCCACGCCGTAAACGATGAGTGCTAAGTGTCGGGGGTGACCAACCCTCGGTGCTGTCGCTAACGCAATAAGCACTCCGCCTGGGGAGTACGGCCGCAAGGCTGAAACTCAAAGGAATTGACGGGGACCCGCACAAGCGGTGGAGCATGTGGTTTAATTCGAAGCAACGCGAAGAACCTTACCAAGGCTTGACATCCCTCTGACCGGTCTAGAGATAGATCTTTCCCTTCGGGGACAGGGGTGACAGGTGGTGCATGGTTGTCGTCAGCTCGTGTCGTGAGATGTTGGGTTAAGTCCCGCAACGAGCGCAACCC	0	0	0	0	0	0	10	1	3	0	14	3.5	5	16	8	3	32	8	22	90	38	29	179	44.75	4
Ammoniphilus_resinae_2	S	1	0	Aged_3_36170	100	100	N	Ammoniphilus_resinae	nt|LT853757.1	-	-	-	-	-	Bacteria	Firmicutes	Bacilli	Bacillales	Paenibacillaceae	Ammoniphilus	Ammoniphilus_resinae	Aged_2_113449;Compost_1_179907;Aged_3_36170;Aged_1_25491;Aged_4_84390;Aged_1_146191;Aged_3_103960	GGATTAGATACCCTGGTAGTCCACGCCGTAAACGATGAGTGCTAAGTGTCGGGGGTGACCAACCCTCGGTGCTGTCGCTAACGCAATAAGCACTCCGCCTGGGGAGTACGGCCGCAAGGCTGAAACTCAAAGGAATTGACGGGGACCCGCACAAGCGGTGGAGCATGTGGTTTAATTCGAAGCAACGCGAAGAACCTTACCAAGGCTTGACATCCCTCTGACCGGTCTAGAGATAGGCCTTTCCCTTCGGGGACAGAGGTGACAGGTGGTGCATGGTTGTCGTCAGCTCGTGTCGTGAGATGTTGGGTTAAGTCCCGCAACGAGCGCAACCC	GGATTAGATACCCTGGTAGTCCACGCCGTAAACGATGAGTGCTAAGTGTCGGGGGTGACCAACCCTCGGTGCTGTCGCTAACGCAATAAGCACTCCGCCTGGGGAGTACGGCCGCAAGGCTGAAACTCAAAGGAATTGACGGGGACCCGCACAAGCGGTGGAGCATGTGGTTTAATTCGAAGCAACGCGAAGAACCTTACCAAGGCTTGACATCCCTCTGACCGGTCTAGAGATAGGCCTTTCCCTTCGGGGACAGAGGTGACAGGTGGTGCATGGTTGTCGTCAGCTCGTGTCGTGAGATGTTGGGTTAAGTCCCGCAACGAGCGCAACCC	0	0	0	0	0	0	1	2	0	3	6	1.5	15	13	25	7	60	15	15	9	14	20	58	14.5	5
Anaerobacter_1	G	1	0	Aged_2_122646	100	100	N	Anaerobacter	rdp|S001939342	-	-	-	-	-	Bacteria	Firmicutes	Clostridia	Clostridiales	Clostridiaceae	Anaerobacter	Anaerobacter	Aged_4_181836;Aged_2_122646;Middle_3_48537;Middle_2_81817	GGATTAGATACCCTGGTAGTCCTAGCCGTAAACGATGGGTACTAGGTGTTGGGGGTTTCAATCCTCCAGTGCCGCAGTTAACGCATTAAGTACCCCGCCTGGGGAGTACGGCCGCAAGGCTGAAACTCAAAGGAATTGACGGGGGCCCGCACAAGCAGCGGAGCATGTGGTTTAATTCGATGCAACGCGAAGAACCTTACCAGGGCTTGACATCCTCTGAAGCTGTAAGAAATTACAGTGTCCCTTCGGGGCAGAGAGACAGGTGGTGCATGGTTGTCGTCAGCTCGTGTCGTGAGATGTTGGGTTAAGTCCCGCAACGAGCGCGACCC	GGATTAGATACCCTGGTAGTCCTAGCCGTAAACGATGGGTACTAGGTGTTGGGGGTTTCAATCCTCCAGTGCCGCAGTTAACGCATTAAGTACCCCGCCTGGGGAGTACGGCCGCAAGGCTGAAACTCAAAGGAATTGACGGGGGCCCGCACAAGCAGCGGAGCATGTGGTTTAATTCGATGCAACGCGAAGAACCTTACCAGGGCTTGACATCCTCTGAAGCTGTAAGAAATTACAGTGTCCCTTCGGGGCAGAGAGACAGGTGGTGCATGGTTGTCGTCAGCTCGTGTCGTGAGATGTTGGGTTAAGTCCCGCAACGAGCGCAACCC	0	0	0	0	0	0	0	0	0	0	0	0	0	0	0	0	0	0	115	103	114	48	380	95	0
Anaerocolumna_xylanovorans_1	S	1	0	Aged_1_48516	99.698	100	N	Anaerocolumna_xylanovorans	16SMicrobial|NR_028740.1	Anaerocolumna_xylanovorans	0	Anaerocolumna_xylanovorans	nt|NR_028740.1	99.698/100.0	Bacteria	Firmicutes	Clostridia	Clostridiales	Lachnospiraceae	Anaerocolumna	Anaerocolumna_xylanovorans	Aged_3_16857;Aged_1_48516;Aged_3_163405;Aged_4_114134;Aged_3_91304;Aged_1_13149	GGATTAGATACCCTGGTAGTCCACGCCGTAAACGATGAATACTAGGTGTCGGGGGTCAAAAGACCTTCGGTGCCGTCGCAAACGCATTAAGTATTCCACCTGGGGAGTACGTTCGCAAGAATGAAACTCAAAGGAATTGACGGGGACCCGCACAAGCGGTGGAGCATGTGGTTTAATTCGAAGCAACGCGAAGAACCTTACCAGGTCTTGACATCCCCCTGACCGGTCCGTAACGGGGCCTTTCCTTCGGGACAGGGGAGACAGGTGGTGCATGGTTGTCGTCAGCTCGTGTCGTGAGATGTTGGGTTAAGTCCCGCAACGAGCGCAACCC	GGATTAGATACCCTGGTAGTCCACGCCGTAAACGATGAATACTAGGTGTTGGGGGTCAAAAGACCTTCGGTGCCGTCGCAAACGCATTAAGTATTCCACCTGGGGAGTACGTTCGCAAGAATGAAACTCAAAGGAATTGACGGGGACCCGCACAAGCGGTGGAGCATGTGGTTTAATTCGAAGCAACGCGAAGAACCTTACCAGGTCTTGACATCCCCCTGACCGGTCCGTAACGGGGCCTTTCCTTCGGGACAGGGGAGACAGGTGGTGCATGGTTGTCGTCAGCTCGTGTCGTGAGATGTTGGGTTAAGTCCCGCAACGAGCGCAACCC	0	0	0	0	0	0	1	0	2	0	3	0.75	4	2	6	5	17	4.25	8	1	2	2	13	3.25	2
Anaerolineaceae_1	F	2	0	Aged_1_107754	99.096	100	N	Anaerolineaceae	nt|JX505003.1	-	-	-	-	-	Bacteria	Chloroflexi	Anaerolineae	Anaerolineales	Anaerolineaceae	Anaerolineaceae	Anaerolineaceae	Aged_2_123642;Aged_1_119924;Aged_1_107754;Aged_1_148134;Aged_1_12420;Aged_1_151939;Aged_1_48829	GGATTAGATACCCCGGTAGTCCTAGCCGTAAACGATGGACACTAGGTGTTGGTGGTATCAACCCCGCCAGTGCCGAAGCTAACGCATTAAGTGTCCCGCCTGGGGAGTACGGCCGCAAGGCTAAAACTCAAAGGAATTGACGGGGGCCCGCACAAGCAGCGGAGCGTGGGGTTTAATTCGACGCAACGCGAAGAACCTTACCAGGGCTTGACATGACCAGGAAAACGGCGGAAACGTCGTCCTCCCGCAAGGGACCTGGCCACAGGTGTTGCATGGCTGTCGTCAGCTCGTGTCGTGAGATGTTGGGTTAAGTCCCGCAACGAGCGCAACCC	GGATTAGATACCCCGGTAGTCCTAGCCGTAAACGATGGACACTAGGTGTTGGTGGTATCAACCCCGCCAGTGCCGAAGCTAACGCATTAAGTGTCCCGCCTGGGGAGTACGGCCGCAAGGCTAAAACTCAAAGGAATTGACGGGGGCCCGCACAAGCAGCGGAGCGTGGGGTTTAATTCGACGCAACGCGAAGAACCTTACCAGGACTTGACATGACCAGGAAAACGGCGGAAACGTCGTCCCCCCGCAAGGGGCCTGGCCACAGGTGTTGCATGGCTGTCGTCAGCTCGTGTCGTGAGATGTTGGGTTAAGTCCCGCAACGAGCGCAACCC	168	30	30	737	965	241.25	30	19	19	26	94	23.5	27	31	22	15	95	23.75	3	6	7	12	28	7	5
Anaerolineae_1	C	1	0	Aged_1_131597	99.699	100	N	Anaerolineae	nt|AM935819.1	-	-	-	-	-	Bacteria	Chloroflexi	Anaerolineae	Anaerolineae	Anaerolineae	Anaerolineae	Anaerolineae	Aged_1_11154;Aged_1_77668;Aged_1_149154;Aged_1_131597;Aged_1_96224;Aged_4_126972;Aged_1_152938	GGATTAGATACCCCGGTAGTCCTAGCCGTAAACGATGGACACTAGGTGTTGGTGGTATCAACCCCGCCAGTGCCGAAGCTAACGCATTAAGTGTCCCGCCTGGGGAGTACGGCCGCAAGGCTAAAACTCAAAGGAATTGACGGGGCCCCGCACAAGCAGCGGAGCGTGGGGTTTAATTCGACGCAACGCGAAGAACCTTACCAGGGCTTGACATGACCAGGATCCCGGCGGAAACGTCGGTTCCCCGCAAGGGGCCTGGCCACAGGTGTTGCATGGCTGTCGTCAGCTCGTGTCGTGAGATGTTGGGTTAAGTCCCGCAACGAGCGCGACCC	GGATTAGATACCCCGGTAGTCCTAGCCGTAAACGATGGACACTAGGTGTTGGTGGTATCAACCCCGCCAGTGCCGAAGCTAACGCATTAAGTGTCCCGCCTGGGGAGTACGGCCGCAAGGCTAAAACTCAAAGGAATTGACGGGGGCCCGCACAAGCAGCGGAGCGTGGGGTTTAATTCGACGCAACGCGAAGAACCTTACCAGGGCTTGACATGACCAGGATCCCGGCGGAAACGTCGGTTCCCCGCAAGGGGCCTGGCCACAGGTGTTGCATGGCTGTCGTCAGCTCGTGTCGTGAGATGTTGGGTTAAGTCCCGCAACGAGCGCAACCC	0	0	0	0	0	0	0	0	0	0	0	0	0	4	4	12	20	5	39	51	55	42	187	46.75	30
Anaerolineae_2	C	1	0	Compost_1_165263	100	100	N	Anaerolineae	silva|AJ249106.1.1488	-	-	-	-	-	Bacteria	Chloroflexi	Anaerolineae	Anaerolineae	Anaerolineae	Anaerolineae	Anaerolineae	Compost_1_165263;Compost_1_30605;Compost_1_106635	GGATTAGATACCCTGGTAGTCCACGCCGTAAACGATGTCAACTGGGTGTCGGTAGTTTTACACTAGCGGTGCCGAAGCTAACGCGTTAAGTTGACCGCCTGGGGACTACGGCCGCAAGGCTAAAACTCAAAGGAATTGACGGGGGCCCGCACAAGCAGCGGAGCGTGTGGTTTAATTCGATGCGACACGAAGAACCTTACCCAGGTTTGACATGTACGTAGTAGTGAAGCGAAAGCGGAACGAGCCTTCGGGCAGCGTACACAGGTGTTGCATGGCTGTCGTCAGCTCGTGTCGTGAGATGTTGGGTTAAGTCCCGCAACGAGCGCAACCC	GGATTAGATACCCTGGTAGTCCACGCCGTAAACGATGTCAACTGGGTGTCGGTAGTTTTACACTAGCGGTGCCGAAGCTAACGCGTTAAGTTGACCGCCTGGGGACTACGGCCGCAAGGCTAAAACTCAAAGGAATTGACGGGGGCCCGCACAAGCAGCGGAGCGTGTGGTTTAATTCGATGCGACACGAAGAACCTTACCCAGGTTTGACATGTACGTAGTAGTGAAGCGAAAGCGGAACGAGCCTTCGGGCAGCGTACACAGGTGTTGCATGGCTGTCGTCAGCTCGTGTCGTGAGATGTTGGGTTAAGTCCCGCAACGAGCGCAACCC	0	0	0	0	0	0	0	0	0	0	0	0	0	0	13	10	23	5.75	102	8	14	4	128	32	0
Anaerolineae_3	C	1	0	Aged_2_112419	99.394	100	N	Anaerolineae	silva|CU917812.1.1324	-	-	-	-	-	Bacteria	Chloroflexi	Anaerolineae	Anaerolineae	Anaerolineae	Anaerolineae	Anaerolineae	Aged_1_86322;Aged_2_147167;Aged_1_23536;Aged_1_130493;Aged_2_112419	GGCTTAGATACCCCGGTAGTCCTAGCTGTAAACGTTGGATACTAGGTAATGGTGGTCAAGGCCATCAGTGCCGAAGCAAACGCGTTAAGTATCCCGCCTGGGGACTACGACCGCAAGGTTAAAACTCAAAGGAATTGACGGGGACCCGCACAAGCAGCGGAGCGTGTGGTTTAATTCGATGCTACACGAAGAACCTTACCTGGGCTTGACATGTACGTCGTAGGGAACCGAAAGGGGACCGATCCTTCGGGAAGCGTACACAGGTGCTGCATGGCTGTCGTCAGCTCGTGCCGTGAGGTGTTCGGTTAAGTCCGACAACGAGCGCGACCC	GGCTTAGATACCCCGGTAGTCCTAGCTGTAAACGTTGGATACTAGGTAATGGTGGTCAAGGCCATCAGTGCCGAAGCAAACGCGTTAAGTATCCCGCCTGGGGACTACGACCGCAAGGTTAAAACTCAAAGGAATTGACGGGGACCCGCACAAGCAGCGGAGCGTGTGGTTTAATTCGATGCTACACGAAGAACCTTACCTGGGCTTGACATGTACGTCGTAGGGGACCGAAAGGCGACCGATCCTTCGGGAAGCGTACACAGGTGCTGCATGGCTGTCGTCAGCTCGTGCCGTGAGGTGTTCGGTTAAGTCCGACAACGAGCGCAACCC	4	0	0	0	4	1	7	1	1	11	20	5	22	10	14	25	71	17.75	97	83	99	170	449	112.25	123
Anaerolineae_4	C	1	0	Aged_1_160667	99.398	100	N	Anaerolineae	silva|CU918316.1.1384	-	-	-	-	-	Bacteria	Chloroflexi	Anaerolineae	Anaerolineae	Anaerolineae	Anaerolineae	Anaerolineae	Aged_2_69722;Aged_1_13207;Aged_1_139530;Aged_2_113965;Aged_1_160667;Aged_1_98134	GGCTTAGATACCCCGGTAGTCCTAGCTGTAAACTTTGGATACTGGGTATTGGGGGTGACAATGCCCTCAGTGCCGAAGCCAACGCGTTAAGTATCCCGCCTGGGGACTACGGCCGCAAGGTTAAAACTCAAAGGAATTGACGGGGGCCCGCACAAGCAGCGGAGCGTGTGGTTTAATTCGATGCGACACGAAGAACCTTACCTGGGTTTGACATGTACGTAGTAGGGGACCGAAAGGCGACCGACCCTTCGGGGAGCGTACACAGGTGCTGCATGGCTGTCGTCAGCTCGTGCCGTGAGGTGTTGGGTTAAGTCCCACAACGAGCGCAACCC	GGCTTAGATACCCCGGTAGTCCTAGCTGTAAACGTTGGATACTGGGTATTGGGGGTGACAATGCCCTCAGTGCCGAAGCAAACGCGTTAAGTATCCCGCCTGGGGACTACGGCCGCAAGGTTAAAACTCAAAGGAATTGACGGGGGCCCGCACAAGCAGCGGAGCGTGTGGTTTAATTCGATGCGACACGAAGAACCTTACCTGGGTTTGACATGTACGTAGTAGGGGACCGAAAGGCGACCGACCCTTCGGGGAGCGTACACAGGTGCTGCATGGCTGTCGTCAGCTCGTGCCGTGAGGTGTTGGGTTAAGTCCCACAACGAGCGCAACCC	0	0	0	0	0	0	6	1	2	3	12	3	0	3	4	13	20	5	53	41	18	10	122	30.5	10
Anaerolineae_5	C	1	0	Aged_1_137314	99.394	100	N	Anaerolineae	silva|EU012238.1.1027	-	-	-	-	-	Bacteria	Chloroflexi	Anaerolineae	Anaerolineae	Anaerolineae	Anaerolineae	Anaerolineae	Aged_1_128939;Aged_1_11499;Aged_1_137314;Aged_1_113458;Aged_1_140129;Aged_1_12071;Aged_1_131910;Aged_1_106313	GGATTAGATACCCCGGTAGTCCACACCGTAAACGATGAACCCTAGGTGTGGGGGGGTAAAACCCTCCGTGCCGAAGCCAACGCGTTAAGGGTTCCGCCTGGGGACTATGAGCGCAAGCTTAAAACTCAAAGGAATTGACGGGGGCCCGCACAAGCAGCGGAGCGTGCGGTTCAATTCGATGCGACACGAAGAACCTTACCAGGGTTTGACATGCAGGTGGTAGGGAAGGGAAACCGGACCGACTCGCAAGAGAGCCTGCACAGGTGATGCATGGCTGTCGTCAGCTCGTGCCGTGAGGTGTTGGGTTAAGTCCCGCAACGAGCGCAACCC	GGATTAGATACCCCGGTAGTCCACACTGTAAACGATGAACCCTAGGTGTGGGGGGGTAAAACCCTCCGTGCCGAAGCCAACGCGTTAAGGGTTCCGCCTGGGGACTATGAGCGCAAGCTTAAAACTCAAAGGAATTGACGGGGGCCCGCACAAGCAGCGGAGCGTGCGGTTCAATTCGATGCGACACGAAGAACCTTACCAGGGTTTGACATGCAGGTGGTAGGGAAGGGAAACTGGACCGACTCGCAAGAGAGCCTGCACAGGTGATGCATGGCTGTCGTCAGCTCGTGCCGTGAGGTGTTGGGTTAAGTCCCGCAACGAGCGCAACCC	0	0	0	0	0	0	7	1	9	7	24	6	35	13	57	707	812	203	102	39	61	76	278	69.5	13
Anaerolineae_6	C	1	0	Aged_1_29213	100	100	N	Anaerolineae	silva|FN563178.1.1423	-	-	-	-	-	Bacteria	Chloroflexi	Anaerolineae	Anaerolineae	Anaerolineae	Anaerolineae	Anaerolineae	Aged_2_117780;Aged_1_29213	GGATTAGATACCCCGGTAGTCCACGCCGTAAACGGTGGGTACTAGGTGTTGGTGGCTATCGTCATCAGTGCCGTAGCTAACGCGTTAAGTACCCCGCCTGGGGACTACGGCCGCAAGGCTAAAACTCAAAGGAATTGACGGGGGCCCGCACAAGCAGCGGAGCGTGTGGTTTAATTCGAGGCAACACGAAGAACCTTACCTGGGCTTGACATGCACGTAGTAGTGAAGCGAAAGCGGATCGATCCTTCGGGAAGCGTGCACAGGTGCTGCATGGCTGTCGTCAGCTCGTGCCGTGAGGTGTTCGGTTAAGTCCGGTAACGAGCGCGACCC	GGATTAGATACCCCGGTAGTCCACGCCGTAAACGGTGGGTACTAGGTGTTGGTGGCTATCGTCATCAGTGCCGTAGCTAACGCGTTAAGTACCCCGCCTGGGGACTACGGCCGCAAGGCTAAAACTCAAAGGAATTGACGGGGGCCCGCACAAGCAGCGGAGCGTGTGGTTTAATTCGAGGCAACACGAAGAACCTTACCTGGGCTTGACATGCACGTAGTAGTGAAGCGAAAGCGGATCGATCCTTCGGGAAGCGTGCACAGGTGCTGCATGGCTGTCGTCAGCTCGTGCCGTGAGGTGTTCGGTTAAGTCCGGTAACGAGCGCAACCC	0	0	0	0	0	0	34	47	20	27	128	32	285	176	122	148	731	182.75	65	53	90	92	300	75	60
Anaerolineae_7	C	1	0	Aged_1_34095	100	100	N	Anaerolineae	silva|KF916806.1.845	-	-	-	-	-	Bacteria	Chloroflexi	Anaerolineae	Anaerolineae	Anaerolineae	Anaerolineae	Anaerolineae	Aged_1_118393;Aged_1_34095;Aged_1_36862;Aged_2_109732;Aged_1_30235	GGATTAGATACCCCGGTAGTCCTAGCTGTAAACTTTGGATACTGGGTATTGGGGGTGTAGATTCCCTCAGTGCCGAAGCAAACGCGTTAAGTATCCCGCCTGGGGACTACGGCCGCAAGGTTAAAACTCAAAGGAATTGACGGGGGCCCGCACAAGCAGCGGAGCGTGTGGTTTAATTCGATGCGACACGAAGAACCTTACCTGGGCTTGACATGAACGTGGTAGGGGGCTGAAAGGTGACCGACCCTTCGGGGAGCGTTCACAGGTGCTGCATGGCTGTCGTCAGCTCGTGCCGTGAGGTGTTGGGTTAAGTCCCACAACGAGCGCAACCC	GGCTTAGATACCCCGGTAGTCCTAGCTGTAAACTTTGGATACTGGGTATTGGGGGTGTAGATTCCCTCAGTGCCGAAGCAAACGCGTTAAGTATCCCGCCTGGGGACTACGGCCGCAAGGTTAAAACTCAAAGGAATTGACGGGGGCCCGCACAAGCAGCGGAGCGTGTGGTTTAATTCGATGCGACACGAAGAACCTTACCTGGGCTTGACATGAACGTGGTAGGGGGCTGAAAGGTGACCGACCCTTCGGGGAGCGTTCACAGGTGCTGCATGGCTGTCGTCAGCTCGTGCCGTGAGGTGTTGGGTTAAGTCCCACAACGAGCGCAACCC	0	0	0	0	0	0	3	0	2	0	5	1.25	4	2	1	5	12	3	26	35	32	27	120	30	11
Anaerolineae_8	C	1	0	Aged_1_103331	99.7	100	N	Anaerolineae	silva|KT167055.1.1419	-	-	-	-	-	Bacteria	Chloroflexi	Anaerolineae	Anaerolineae	Anaerolineae	Anaerolineae	Anaerolineae	Aged_1_26656;Aged_1_130659;Aged_1_102818;Aged_1_125734;Aged_1_137683;Aged_1_103331;Aged_1_147863	GGCTTAGATACCCCGGTAGTCCTAGCTGTAAACGTTGGATACTAGGTATTGGGGGAGGAGAGTCCCTCAGTGCCGAAGCAAACGCGTTAAGTATCCCGCCTGGGGACTACGGCCGCAAGGTTAAAACTCAAAGGAATTGACGGGGGCCCGCACAAGCAGCGGAGCGTGTGGTTTAATTCGATGCAACACGAAGAACCTTACCTGGGCTTGACATGCAGGTAGTAGGGAAGGGAAACCGGACCGACCCTTCGGGGAGCCTGCACAGGTGCTGCATGGCTGTCGTCAGCTCGTGCCGTGAGGTGTTGGGTTAAGTCCCACAACGAGCGCAACCC	GGCTTAGATACCCCGGTAGTCCTAGCTGTAAACGTTGGATACTAGGTATTGGGGGGAGGAGAGTCCCTCAGTGCCGAAGCAAACGCGTTAAGTATCCCGCCTGGGGACTACGGCCGCAAGGTTAAAACTCAAAGGAATTGACGGGGGCCCGCACAAGCAGCGGAGCGTGTGGTTTAATTCGATGCAACACGAAGAACCTTACCTGGGCTTGACATGCAGGTAGTAGGGAAGGGAAACCGGACCGACCCTTCGGGGAGCCTGCACAGGTGCTGCATGGCTGTCGTCAGCTCGTGCCGTGAGGTGTTGGGTTAAGTCCCACAACGAGCGCAACCC	38	31	10	13	92	23	10	5	13	11	39	9.75	14	9	0	6	29	7.25	5	5	4	8	22	5.5	0
Anaeromyxobacter_1	G	1	0	Aged_1_8834	100	100	N	Anaeromyxobacter	rdp|S000493226;silva|AY921992.1.1412	-	-	-	-	-	Bacteria	Proteobacteria	Deltaproteobacteria	Myxococcales	Cystobacterineae	Anaeromyxobacter	Anaeromyxobacter	Aged_1_130507;Aged_1_8834;Aged_3_132410;Compost_1_117587	GGATTAGATACCCTGGTAGTCCACGCCGTAAACGATGAGCGCTAGGTGTTGTGGGTGTTGACCCCCGCAGTGCCGCAGCTAACGCATTAAGCGCTCCGCCTGGGAAGTACGGCCGCAAGGCTAAAACTCAAAGGAATTGACGGGGGCCCGCACAAGCGGTGGAGCATGTGGTTTAATTCGACGCAACGCGCAGAACCTTACCTGGTCTTGACATCCTCGGAATCCTCCAGAGATGGGGGAGTGCCCGCAAGGGAACCGAGAGACAGGTGCTGCATGGCTGTCGTCAGCTCGTGTCGTGAGATGTTGGGTTAAGTCCCGCAACGAGCGCGACCC	GGATTAGATACCCTGGTAGTCCACGCCGTAAACGATGAGCGCTAGGTGTTGTGGGTGTTGACCCCCGCAGTGCCGCAGCTAACGCATTAAGCGCTCCGCCTGGGAAGTACGGCCGCAAGGCTAAAACTCAAAGGAATTGACGGGGGCCCGCACAAGCGGTGGAGCATGTGGTTTAATTCGACGCAACGCGCAGAACCTTACCTGGTCTTGACATCCTCGGAATCCTCCAGAGATGGGGGAGTGCCCGCAAGGGAACCGAGAGACAGGTGCTGCATGGCTGTCGTCAGCTCGTGTCGTGAGATGTTGGGTTAAGTCCCGCAACGAGCGCAACCC	0	0	0	0	0	0	35	7	20	45	107	26.75	22	26	39	25	112	28	21	59	40	27	147	36.75	29
Anaeromyxobacter_2	G	1	0	Aged_2_90525	100	100	N	Anaeromyxobacter	rdp|S002175314;silva|HM030638.1.814	-	-	-	-	-	Bacteria	Proteobacteria	Deltaproteobacteria	Myxococcales	Cystobacterineae	Anaeromyxobacter	Anaeromyxobacter	Aged_2_90525;Aged_2_114520	GGATTAGATACCCTGGTAGTCCACGCCGTAAACGATGAGCGCTAGGTGTTGTGGGTGTTGACCCCCGCAGTGCCGCAGCTAACGCATTAAGCGCTCCGCCTGGGAAGTACGGCCGCAAGGCTAAAACTCAAAGGAATTGACGGGGGCCCGCACAAGCGGTGGAGCATGTGGTTTAATTCGACGCAACGCGCAGAACCTTACCTGGTCTTGACATCCTCGGAATCCTTCAGAGATGAGGGAGTGCCCGCAAGGGAACCGAGAGACAGGTGCTGCATGGCTGTCGTCAGCTCGTGTCGTGAGATGTTGGGTTAAGTCCCGCAACGAGCGCAACCC	GGATTAGATACCCTGGTAGTCCACGCCGTAAACGATGAGCGCTAGGTGTTGTGGGTGTTGACCCCCGCAGTGCCGCAGCTAACGCATTAAGCGCTCCGCCTGGGAAGTACGGCCGCAAGGCTAAAACTCAAAGGAATTGACGGGGGCCCGCACAAGCGGTGGAGCATGTGGTTTAATTCGACGCAACGCGCAGAACCTTACCTGGTCTTGACATCCTCGGAATCCTTCAGAGATGAGGGAGTGCCCGCAAGGGAACCGAGAGACAGGTGCTGCATGGCTGTCGTCAGCTCGTGTCGTGAGATGTTGGGTTAAGTCCCGCAACGAGCGCAACCC	18	112	13	3	146	36.5	11	58	10	35	114	28.5	19	11	11	13	54	13.5	13	19	16	13	61	15.25	8
Anaeromyxobacter_3	G	1	0	Aged_1_110152	99.7	100	N	Anaeromyxobacter	rdp|S002948083;silva|AB746090.1.627	-	-	-	-	-	Bacteria	Proteobacteria	Deltaproteobacteria	Myxococcales	Cystobacterineae	Anaeromyxobacter	Anaeromyxobacter	Aged_1_105231;Aged_1_120191;Aged_1_110152;Aged_1_100857;Aged_1_100887;Aged_1_104659;Aged_1_106021;Aged_1_100956	GGATTAGATACCCTGGTAGTCCACGCCGTAAACGATGAGCGCTAGGTGTTGCGGGTGTTGACCCCTGCAGTGCCGCAGCTAACGCATTAAGCGCTCCGCCTGGGAAGTACGGCCGCAAGGCTAAAACTCAAAGGAATTGACGGGGGCCCGCACAAGCGGTGGAGCATGTGGTTTAATTCGACGCAACGCGCAGAACCTTACCTGGTCTTGACATCCTAGGAACCCGCCAGAGATGGTGGGGTGCCCGCAAGGGAACCTAGAGACAGGTGCTGCATGGCTGTCGTCAGCTCGTGTCGTGAGATGTTGGGTTAAGTCCCGCAACGAGCGCAACCC	GGATTAGATACCCTGGTAGTCCACGCCGTAAACGATGAGCGCTAGGTGTTGCGGGTGTTGACCCCTGCAGTGCCGCAGCTAACGCATTAAGCGCTCCGCCTGGGAAGTACGGCCGCAAGGCTAAAACTCAAAGGAATTGACGGGGGCCCGCACAAGCGGTGGAGCATGTGGTTTAATTCGACGCAACGCGCAGAACCTTACCTGGTCTTGACATCCTAGGAACCCGCCAGAGATGGTGGGGTGCCCGCAAGGGAGCCTAGAGACAGGTGCTGCATGGCTGTCGTCAGCTCGTGTCGTGAGATGTTGGGTTAAGTCCCGCAACGAGCGCAACCC	0	0	0	0	0	0	0	0	1	0	1	0.25	0	0	1	1	2	0.5	117	0	19	23	159	39.75	18
Anaeromyxobacter_4	G	1	0	Aged_3_130781	100	100	N	Anaeromyxobacter	rdp|S003323016;silva|AB744439.1.627	-	-	-	-	-	Bacteria	Proteobacteria	Deltaproteobacteria	Myxococcales	Cystobacterineae	Anaeromyxobacter	Anaeromyxobacter	Aged_3_130781;Aged_3_109856;Aged_1_134839	GGATTAGATACCCTGGTAGTCCACGCCGTAAACGATGAGCGCTAGGTGTTGTGGGTGTTGACCCCTGCAGTGCCGCAGCTAACGCATTAAGCGCTCCGCCTGGGAAGTACGGCCGCAAGGCTAAAACTCAAAGGAATTGACGGGGGCCCGCACAAGCGGTGGAGCATGTGGTTTAATTCGACGCAACGCGCAGAACCTTACCTGGTCTTGACATCCTCGGAATCCCTCAGAGATGAGGGAGTGCCCGCAAGGGAACCGAGAGACAGGTGCTGCATGGCTGTCGTCAGCTCGTGTCGTGAGATGTTGGGTTAAGTCCCGCAACGAGCGCAACCC	GGATTAGATACCCTGGTAGTCCACGCCGTAAACGATGAGCGCTAGGTGTTGTGGGTGTTGACCCCTGCAGTGCCGCAGCTAACGCATTAAGCGCTCCGCCTGGGAAGTACGGCCGCAAGGCTAAAACTCAAAGGAATTGACGGGGGCCCGCACAAGCGGTGGAGCATGTGGTTTAATTCGACGCAACGCGCAGAACCTTACCTGGTCTTGACATCCTCGGAATCCCTCAGAGATGAGGGAGTGCCCGCAAGGGAACCGAGAGACAGGTGCTGCATGGCTGTCGTCAGCTCGTGTCGTGAGATGTTGGGTTAAGTCCCGCAACGAGCGCAACCC	0	0	0	0	0	0	0	0	0	0	0	0	0	0	0	0	0	0	50	33	86	57	226	56.5	3
Anaeromyxobacter_dehalogenans_1	S	1	0	Aged_1_148732	99.399	100	N	Anaeromyxobacter_dehalogenans	nt|AF382397.1	-	-	-	-	-	Bacteria	Proteobacteria	Deltaproteobacteria	Myxococcales	Cystobacterineae	Anaeromyxobacter	Anaeromyxobacter_dehalogenans	Aged_1_152606;Aged_1_148732;Aged_1_53213;Aged_1_113379;Aged_1_42747	GGATTAGATACCCTGGTAGTCCACGCCGTAAACGATGAGCGCTAGGTGTTGCGGGTGTTGACCCCTGCAGTGCCGCAGCTAACGCATTAAGCGCTCCGCCTGGGAAGTACGGCCGCAAGGCTAAAACTCAAAGGAATTGACGGGGGCCCGCACAAGCGGTGGAGCATGTGGTTTAATTCGACGCAACGCGCAGAACCTTACCTGGTCTTGACATCCTCGGAATCCCTCAGAGATGAGGGAGTGCCCGCAAGGGAACCGAGAGACAGGTGCTGCATGGCTGTCGTCAGCTCGTGTCGTGAGATGTTGGGTTAAGTCCCGCAACGAGCGCAACCC	GGATTAGATACCCTGGTAGTCCACGCTGTAAACGATGAGCGCTAGGTGTTGCGGGTGTTGACCCCTGCAGTGCCGCAGCTAACGCATTAAGCGCTCCGCCTGGGAAGTACGGCCGCAAGGCTAAAACTCAAAGGAATTGACGGGGGCCCGCACAAGCGGTGGAGCATGTGGTTTAATTCGACGCAACGCGCAGAACCTTACCTGGTCTTGACATCCTCGGAATCCCTCAGAGATGAGGGGGTGCCCGCAAGGGAACCGAGAGACAGGTGCTGCATGGCTGTCGTCAGCTCGTGTCGTGAGATGTTGGGTTAAGTCCCGCAACGAGCGCAACCC	0	0	0	0	0	0	0	0	4	2	6	1.5	1	2	1	1	5	1.25	26	25	42	17	110	27.5	2
Anderseniella_1	G	1	0	Aged_2_61245	100	100	N	Anderseniella	rdp|S000854347	-	-	-	-	-	Bacteria	Proteobacteria	Alphaproteobacteria	Rhizobiales	Rhodobiaceae	Anderseniella	Anderseniella	Compost_1_129378;Compost_1_134129;Compost_1_133993;Aged_2_61245;Compost_1_118160;Compost_1_122431	GGATTAGATACCCTGGTAGTCCACGCCGTAAACTATGGGTGCTAGCCGTCAGGAAGCTTGCTTTTTGGTGGCGCAGCTAACGCATTAAGCACCCCGCCTGGGGAGTACGGTCGCAAGATTAAAACTCAAAGGAATTGACGGGGGCCCGCACAAGCGGTGGAGCATGTGGTTTAATTCGAAGCAACGCGCAGAACCTTACCTACCCTTGACATGTCCAGTATGGGTTTCAGAGATGAGATCCTTCAGTTCGGCTGGCTGGAACACAGGTGCTGCATGGCTGTCGTCAGCTCGTGTCGTGAGATGTTGGGTTAAGTCCCGCAACGAGCGCGACCC	GGATTAGATACCCTGGTAGTCCACGCCGTAAACTATGGGTGCTAGCCGTCAGGAAGCTTGCTTTTTGGTGGCGCAGCTAACGCATTAAGCACCCCGCCTGGGGAGTACGGTCGCAAGATTAAAACTCAAAGGAATTGACGGGGGCCCGCACAAGCGGTGGAGCATGTGGTTTAATTCGAAGCAACGCGCAGAACCTTACCTACCCTTGACATGTCCAGTATGGGTTTCAGAGATGAGATCCTTCAGTTCGGCTGGCTGGAACACAGGTGCTGCATGGCTGTCGTCAGCTCGTGTCGTGAGATGTTGGGTTAAGTCCCGCAACGAGCGCAACCC	0	0	0	0	0	0	21	5	3	22	51	12.75	84	93	133	71	381	95.25	145	97	108	190	540	135	37
Aneurinibacillus_1	G	1	0	Aged_1_63867	100	100	N	Aneurinibacillus	16SMicrobial|NR_157740.1	Aneurinibacillus	0	Aneurinibacillus	nt|KJ725179.1;rdp|S004219963;silva|KJ725179.1.1451	100.0/100.0	Bacteria	Firmicutes	Bacilli	Bacillales	Paenibacillaceae	Aneurinibacillus	Aneurinibacillus	Aged_1_63867	GGATTAGATACCCTGGTAGTCCACGCCGTAAACGATGAGTGCTAGGTGTTGGGGACTCCAATCCTCAGTGCCGCAGCTAACGCAATAAGCACTCCGCCTGGGGAGTACGGCCGCAAGGCTGAAACTCAAAGGAATTGACGGGGACCCGCACAAGCGGTGGAGCATGTGGTTTAATTCGAAGCAACGCGAAGAACCTTACCAGGGCTTGACATCCCGCTGACCCTCCTAGAGATAGGAGCTCCCTTCGGGGCAGCGGTGACAGGTGGTGCATGGTTGTCGTCAGCTCGTGTCGTGAGATGTTGGGTTAAGTCCCGCAACGAGCGCAACCC	GGATTAGATACCCTGGTAGTCCACGCCGTAAACGATGAGTGCTAGGTGTTGGGGACTCCAATCCTCAGTGCCGCAGCTAACGCAATAAGCACTCCGCCTGGGGAGTACGGCCGCAAGGCTGAAACTCAAAGGAATTGACGGGGACCCGCACAAGCGGTGGAGCATGTGGTTTAATTCGAAGCAACGCGAAGAACCTTACCAGGGCTTGACATCCCGCTGACCCTCCTAGAGATAGGAGCTCCCTTCGGGGCAGCGGTGACAGGTGGTGCATGGTTGTCGTCAGCTCGTGTCGTGAGATGTTGGGTTAAGTCCCGCAACGAGCGCAACCC	0	0	0	0	0	0	3	0	0	0	3	0.75	4	3	2	9	18	4.5	62	84	101	66	313	78.25	60
Aneurinibacillus_2	G	1	0	Aged_2_26871	99.696	100	N	Aneurinibacillus	rdp|S002066775;silva|HM261749.1.1349	-	-	-	-	-	Bacteria	Firmicutes	Bacilli	Bacillales	Paenibacillaceae	Aneurinibacillus	Aneurinibacillus	Aged_3_77226;Aged_4_108049;Aged_2_26871;Aged_1_137200;Aged_1_29322;Aged_1_4019;Aged_1_83311;Aged_1_107604	GGATTAGATACCCTGGTAGTCCACGCCGTAAACGATGAGTGCTAGGTGTTGGGGACTCCAATCCTCAGTGCCGCAGCTAACGCAATAAGCACTCCGCCTGGGGAGTACGGCCGCAAGGCTGAAACTCAAAGGAATTGACGGGGACCCGCACAAGCGGTGGAGCATGTGGTTTAATTCGAAGCAACGCGAAGAACCTTACCAGGGCTTGACATCCCTCTGATCCCTCTAGAGATAGAGGCTCTCTTCGGAGCAGAGGTGACAGGTGGTGCATGGTTGTCGTCAGCTCGTGTCGTGAGATGTTGGGTTAAGTCCCGCAACGAGCGCAACCC	GGATTAGATACCCTGGTAGTCCACGCCGTAAACGATGAGTGCTAGGTGTTGGGGACTCCAATCCTCAGTGCCGCAGCTAACGCAATAAGCACTCCGCCTGGGGAGTACGGCCGCAAGGCTGAAACTCAAAGGAATTGACGGGGACCCGCACAAGCGGTGGAGCATGTGGTTTAACTCGAAGCAACGCGAAGAACCTTACCAGGGCTTGACATCCCTCTGATCCCTCTAGAGATAGAGGCTCTCTTCGGAGCAGAGGTGACAGGTGGTGCATGGTTGTCGTCAGCTCGTGTCGTGAGATGTTGGGTTAAGTCCCGCAACGAGCGCAACCC	0	0	0	0	0	0	0	0	1	2	3	0.75	9	1	3	3	16	4	23	156	168	77	424	106	40
Aneurinibacillus_3	G	3	0	Aged_1_103773	100	100	N	Aneurinibacillus	rdp|S002625776;silva|JF105843.1.1349	-	-	-	-	-	Bacteria	Firmicutes	Bacilli	Bacillales	Paenibacillaceae	Aneurinibacillus	Aneurinibacillus	Aged_3_12080;Aged_1_136727;Aged_1_114182;Aged_1_103773;Aged_1_12169;Aged_1_132036;Aged_1_103881;Aged_1_108124;Aged_1_109656;Aged_1_3844	GGATTAGATACCCTGGTAGTCCACGCCGTAAACGATGAGTGCTAGGTGTTGGGGACTCCAATCCTCAGTGCCGCAGCTAACGCAATAAGCACTCCGCCTGGGGAGTACGGCCGCAAGGCTGAAACTCAAAGGAATTGACGGGGACCCGCACAAGCGGTGGAGCATGTGGTTTAATTCGAAGCAACGCGAAGAACCTTACCAGGGCTTGACATCCCTCTGACCCCTCTAGAGATAGAGGCTCTCTTCGGAGCAGAGGTGACAGGTGGTGCATGGTTGTCGTCAGCTCGTGTCGTGAGATGTTGGGTTAAGTCCCGCAACGAGCGCAACCC	GGATTAGATACCCTGGTAGTCCACGCCGTAAACGATGAGTGCTAGGTGTTGGGGACTCCAATCCTCAGTGCCGCAGCTAACGCAATAAGCACTCCGCCTGGGGAGTACGGCCGCAAGGCTGAAACTCAAAGGAATTGACGGGGACCCGCACAAGCGGTGGAGCATGTGGTTTAATTCGAAGCAACGCGAAGAACCTTACCAGGGCTTGACATCCCTCTGACCCCTCTAGAGATAGAGGCTCTCTTCGGAGCAGAGGTGACAGGTGGTGCATGGTTGTCGTCAGCTCGTGTCGTGAGATGTTGGGTTAAGTCCCGCAACGAGCGCAACCC	0	0	0	0	0	0	2	1	1	2	6	1.5	12	7	17	7	43	10.75	27	43	37	50	157	39.25	51
Aneurinibacillus_4	G	1	0	Aged_2_101050	100	100	N	Aneurinibacillus	rdp|S002631272;silva|JF111339.1.1349	-	-	-	-	-	Bacteria	Firmicutes	Bacilli	Bacillales	Paenibacillaceae	Aneurinibacillus	Aneurinibacillus	Aged_2_101050	GGATTAGATACCCTGGTAGTCCACGCCGTAAACGATGAGTGCTAGGTGTTGGGGACTCCAATCCTCAGTGCCGCAGCTAACGCAATAAGCGCTCCGCCTGGGGAGTACGGCCGCAAGGCTGAAACTCAAAGGAATTGACGGGGACCCGCACAAGCGGTGGAGCATGTGGTTTAATTCGAAGCAACGCGAAGAACCTTACCAGGGCTTGACATCCCTCTGACCCCTCTAGAGATAGAGGCTCTCTTCGGAGCAGAGGTGACAGGTGGTGCATGGTTGTCGTCAGCTCGTGTCGTGAGATGTTGGGTTAAGTCCCGCAACGAGCGCAACCC	GGATTAGATACCCTGGTAGTCCACGCCGTAAACGATGAGTGCTAGGTGTTGGGGACTCCAATCCTCAGTGCCGCAGCTAACGCAATAAGCGCTCCGCCTGGGGAGTACGGCCGCAAGGCTGAAACTCAAAGGAATTGACGGGGACCCGCACAAGCGGTGGAGCATGTGGTTTAATTCGAAGCAACGCGAAGAACCTTACCAGGGCTTGACATCCCTCTGACCCCTCTAGAGATAGAGGCTCTCTTCGGAGCAGAGGTGACAGGTGGTGCATGGTTGTCGTCAGCTCGTGTCGTGAGATGTTGGGTTAAGTCCCGCAACGAGCGCAACCC	0	0	0	0	0	0	3	1	1	2	7	1.75	13	4	4	19	40	10	10	2	5	11	28	7	1
Aneurinibacillus_danicus_1	S	1	0	Compost_1_144169	99.696	100	N	Aneurinibacillus_danicus	16SMicrobial|NR_114088.1	-	-	-	-	-	Bacteria	Firmicutes	Bacilli	Bacillales	Paenibacillaceae	Aneurinibacillus	Aneurinibacillus_danicus	Compost_1_144169	GGCTTAGATACCCTGGTAGTCCACGCCGTAAACGATGAGTGCTAGGTGTTGGGGTCTCCAAACCTCAGTGCCGCAGCTAACGCAATAAGCACTCCGCCTGGGGAGTACGGCCGCAAGGCTGAAACTCAAAGGAATTGACGGGGACCCGCACAAGCGGTGGAGCATGTGGTTTAATTCGAAGCAACGCGAAGAACCTTACCAGGGCTTGACATCCCGCTGACCCCTCTAGAGATAGAGGTTTCCTTCGGGACAGCGGTGACAGGTGGTGCATGGTTGTCGTCAGCTCGTGTCGTGAGATGTTGGGTTAAGTCCCGCAACGAGCGCAACCC	GGATTAGATACCCTGGTAGTCCACGCCGTAAACGATGAGTGCTAGGTGTTGGGGTCTCCAAACCTCAGTGCCGCAGCTAACGCAATAAGCACTCCGCCTGGGGAGTACGGCCGCAAGGCTGAAACTCAAAGGAATTGACGGGGACCCGCACAAGCGGTGGAGCATGTGGTTTAATTCGAAGCAACGCGAAGAACCTTACCAGGGCTTGACATCCCGCTGACCCCTCTAGAGATAGAGGCTTCCTTCGGGACAGCGGTGACAGGTGGTGCATGGTTGTCGTCAGCTCGTGTCGTGAGATGTTGGGTTAAGTCCCGCAACGAGCGCAACCC	0	0	0	0	0	0	0	0	0	0	0	0	0	0	0	0	0	0	40	20	18	23	101	25.25	50
Aneurinibacillus_thermoaerophilus_1	S	1	0	Aged_2_106147	100	100	N	Aneurinibacillus_thermoaerophilus	16SMicrobial|NR_029303.1	Aneurinibacillus_thermoaerophilus	0	Aneurinibacillus_thermoaerophilus	nt|AB360810.1;silva|AB360810.1.1437	100.0/100.0	Bacteria	Firmicutes	Bacilli	Bacillales	Paenibacillaceae	Aneurinibacillus	Aneurinibacillus_thermoaerophilus	Aged_2_147358;Aged_2_106147	GGCTTAGATACCCTGGTAGTCCACGCCGTAAACGATGAGTGCTAGGTGTTGGGGAGTCCACCTCCTCAGTGCCGCAGCTAACGCAATAAGCACTCCGCCTGGGGAGTACGGCCGCAAGGCTGAAACTCAAAGGAATTGACGGGGACCCGCACAAGCGGTGGAGCATGTGGTTTAATTCGAAGCAACGCGAAGAACCTTACCAGGGCTTGACATCCCGCTGACCCCTCCAGAGATGGAGGTTTCCTTCGGGACAGCGGTGACAGGTGGTGCATGGTTGTCGTCAGCTCGTGTCGTGAGATGTTGGGTTAAGTCCCGCAACGAGCGCGACCC	GGATTAGATACCCTGGTAGTCCACGCCGTAAACGATGAGTGCTAGGTGTTGGGGAGTCCACCTCCTCAGTGCCGCAGCTAACGCAATAAGCACTCCGCCTGGGGAGTACGGCCGCAAGGCTGAAACTCAAAGGAATTGACGGGGACCCGCACAAGCGGTGGAGCATGTGGTTTAATTCGAAGCAACGCGAAGAACCTTACCAGGGCTTGACATCCCGCTGACCCCTCCAGAGATGGAGGTTTCCTTCGGGACAGCGGTGACAGGTGGTGCATGGTTGTCGTCAGCTCGTGTCGTGAGATGTTGGGTTAAGTCCCGCAACGAGCGCAACCC	0	0	0	0	0	0	1	0	0	1	2	0.5	5	0	3	0	8	2	47	15	20	36	118	29.5	13
Anoxybacillus_1	G	1	0	Compost_2_155769	99.104	100	Y	Anoxybacillus	silva|KY291094.1.755	-	-	-	-	-	Bacteria	Firmicutes	Bacilli	Bacillales	Bacillaceae	Anoxybacillus	Anoxybacillus	Compost_2_155769	GGATTAGATACCCTGGTAGTCCACGCCGTAAACGATGAGTGCTAAGTGTTAGAGGGTTTCCGCCCTTTAGTGCTGCAGCTAACGCATTAAGCACTCCGCCTGGGGAGTACGGCCGCAAGGCTGAAACTCAAAGGAATTGACGGGGGCCCGCACAAGCGGTGGAGCATGTGGTTTAATTCGAAGCAACGCGAAGAACCTTACCAGGTCTTGACATCCCCTGACAACCCAAGAGATTGGGCGTTCCCCCTTCGGGGGGACAGGGTGACAGGTGGTGCATGGTTGTCGTCAGCTCGTGTCGTGAGATGTTGGGTTAAGTCCCGCAACGAGCGCAACCC	GGATTAGATACCCTGGTAGTCCACGCCGTAAACGATGAGTGCTAAGTGTTAGAGGGTTTCCGCCCTTTAGTGCTGCAGCAAACGCATTAAGCACTCCGCCTGGGGAGTACGGCCGCAAGGCTGAAACTCAAAGGAATTGACGGGGGCCCGCACAAGCGGTGGAGCATGTGGTTTAATTCGAAGCAACGCGAAGAACCTTACCAGGTCTTGACATCCCCTGACAACCCGAGAGATCGGGCGTTCCCCCTTCGGGGGGACAGGGTGACAGGTGGTGCATGGTTGTCGTCAGCTCGTGTCGTGAGATGTTGGGTTAAGTCCCGCAACGAGCGCAACCC	0	0	0	0	0	0	0	0	0	0	0	0	0	0	0	0	0	0	60	6	5	3	74	18.5	4
Anoxybacillus_flavithermus_1	S	1	0	Aged_3_96057	99.701	100	N	Anoxybacillus_flavithermus	nt|AY643748.1;silva|AY643748.1.1523	-	-	-	-	-	Bacteria	Firmicutes	Bacilli	Bacillales	Bacillaceae	Anoxybacillus	Anoxybacillus_flavithermus	Compost_3_110754;Young_1_114371;Aged_3_96057;Aged_2_23105;Aged_1_151438;Compost_2_146914	GGATTAGATACCCTGGTAGTCCACGCCGTAAACGATGAGTGCTAAGTGTTAGAGGGTTTCCGCCCTTTAGTGCTGTAGCTAACGCATTAAGCACTCCGCCTGGGGAGTACGCTCGCAAGAGTGAAACTCAAAGGAATTGACGGGGGCCCGCACAAGCGGTGGAGCATGTGGTTTAATTCGAAGCAACGCGAAGAACCTTACCAGGTCTTGACATCCCCTGACAACCCGAGAGATCGGGCGTTCCCCCTTCGGGGGGACAGGGTGACAGGTGGTGCATGGTTGTCGTCAGCTCGTGTCGTGAGATGTTGGGTTAAGTCCCGCAACGAGCGCAACCC	GGATTAGATACCCTGGTAGTCCACGCCGTAAACGATGAGTGCTAAGTGTTAGAGGGTATCCGCCCTTTAGTGCTGTAGCTAACGCATTAAGCACTCCGCCTGGGGAGTACGCTCGCAAGAGTGAAACTCAAAGGAATTGACGGGGGCCCGCACAAGCGGTGGAGCATGTGGTTTAATTCGAAGCAACGCGAAGAACCTTACCAGGTCTTGACATCCCCTGACAACCCGAGAGATCGGGCGTTCCCCCTTCGGGGGGACAGGGTGACAGGTGGTGCATGGTTGTCGTCAGCTCGTGTCGTGAGATGTTGGGTTAAGTCCCGCAACGAGCGCAACCC	2	0	0	0	2	0.5	17	8	3	31	59	14.75	48	24	61	22	155	38.75	8	7	8	5	28	7	8
Anoxybacillus_toebii_1	S	4	0	Aged_1_127803	100	100	N	Anoxybacillus_toebii	nt|AY466700.1	-	-	-	-	-	Bacteria	Firmicutes	Bacilli	Bacillales	Bacillaceae	Anoxybacillus	Anoxybacillus_toebii	Aged_4_205521;Aged_1_161439;Aged_1_14309;Aged_1_127803;Aged_1_105806;Aged_4_152281;Aged_1_34260;Aged_1_159133;Aged_1_102443;Aged_1_122301	GGATTAGATACCCTGGTAGTCCACGCCGTAAACGATGAGTGCTAGGTGTTGGAGGGGTTTACCCTTCAGTGCTGGAGCTAACGCATTAAGCACTCCGCCTGGGGAGTACGGCCGCAAGGCTGAAACTCAAAGGAATTGACGGGGGCCCGCACAAGCGGTGGAGCATGTGGTTTAATTCGAAGCAACGCGAAGAACCTTACCAGGTCTTGACATCATCCCGACCGCCTGAGAGATCAGGCCTTCCCTTCGGGGACGGGATGACAGGTGGTGCATGGTTGTCGTCAGCTCGTGTCGTGAGATGTTGGGTTAAGTCCCGCAACGAGCGCAACCC	GGATTAGATACCCTGGTAGTCCACGCCGTAAACGATGAGTGCTAGGTGTTGGAGGGGTTTACCCTTCAGTGCTGGAGCTAACGCATTAAGCACTCCGCCTGGGGAGTACGGCCGCAAGGCTGAAACTCAAAGGAATTGACGGGGGCCCGCACAAGCGGTGGAGCATGTGGTTTAATTCGAAGCAACGCGAAGAACCTTACCAGGTCTTGACATCATCCCGACCGCCTGAGAGATCAGGCCTTCCCTTCGGGGACGGGATGACAGGTGGTGCATGGTTGTCGTCAGCTCGTGTCGTGAGATGTTGGGTTAAGTCCCGCAACGAGCGCAACCC	0	3	1	0	4	1	828	178	619	1258	2883	720.75	2114	1596	1606	861	6177	1544.25	453	496	391	665	2005	501.25	200
Aquamicrobium_1	G	1	0	Litter_1_120280	100	100	N	Aquamicrobium	rdp|S004202660	-	-	-	-	-	Bacteria	Proteobacteria	Alphaproteobacteria	Rhizobiales	Phyllobacteriaceae	Aquamicrobium	Aquamicrobium	Litter_1_120280;Aged_3_178407;Aged_3_151260	GGATTAGATACCCTGGTAGTCCACGCCGTAAACTATGAGAGCTAGCCGTCGGCAAGTTTACTTGTCGGTGGCGCAGCTAACGCATTAAGCTCTCCGCCTGGGGAGTACGGTCGCAAGATTAAAACTCAAAGGAATTGACGGGGGCCCGCACAAGCGGTGGAGCATGTGGTTTAATTCGAAGCAACGCGCAGAACCTTACCAGCCCTTGACATGTCACGTTTGGTTACCGGAGACGGTTTCCTTCAGTTCGGCTGGCGTGAACACAGGTGCTGCATGGCTGTCGTCAGCTCGTGTCGTGAGATGTTGGGTTAAGTCCCGCAACGAGCGCAACCC	GGATTAGATACCCTGGTAGTCCACGCCGTAAACTATGAGAGCTAGCCGTCGGCAAGTTTACTTGTCGGTGGCGCAGCTAACGCATTAAGCTCTCCGCCTGGGGAGTACGGTCGCAAGATTAAAACTCAAAGGAATTGACGGGGGCCCGCACAAGCGGTGGAGCATGTGGTTTAATTCGAAGCAACGCGCAGAACCTTACCAGCCCTTGACATGTCACGTTTGGTTACCGGAGACGGTTTCCTTCAGTTCGGCTGGCGTGAACACAGGTGCTGCATGGCTGTCGTCAGCTCGTGTCGTGAGATGTTGGGTTAAGTCCCGCAACGAGCGCAACCC	0	0	0	0	0	0	9	8	40	52	109	27.25	25	49	35	5	114	28.5	34	4	4	9	51	12.75	2
Aquamicrobium_aerolatum_1	S	1	0	Aged_1_102669	100	100	N	Aquamicrobium_aerolatum	16SMicrobial|NR_116910.1	Aquamicrobium_aerolatum	0	Aquamicrobium_aerolatum	nt|NR_116910.1;silva|FM210786.1.1346	100.0/100.0	Bacteria	Proteobacteria	Alphaproteobacteria	Rhizobiales	Phyllobacteriaceae	Aquamicrobium	Aquamicrobium_aerolatum	Aged_4_167260;Litter_1_111768;Aged_1_102669	GGCTTAGATACCCTGGTAGTCCACGCCGTAAACTATGAGAGCTAGCCGTCGGCAAGTTTACTTGTCGGTGGCGCAGCTAACGCATTAAGCTCTCCGCCTGGGGAGTACGGTCGCAAGATTAAAACTCAAAGGAATTGACGGGGGCCCGCACAAGCGGTGGAGCATGTGGTTTAATTCGAAGCAACGCGCAGAACCTTACCAGCCCTTGACATCCCGATCGCGGTTAGTGGAGACACTTTCCTTCAGTTCGGCTGGATCGGAGACAGGTGCTGCATGGCTGTCGTCAGCTCGTGTCGTGAGATGTTGGGTTAAGTCCCGCAACGAGCGCAACCC	GGATTAGATACCCTGGTAGTCCACGCCGTAAACTATGAGAGCTAGCCGTCGGCAAGTTTACTTGTCGGTGGCGCAGCTAACGCATTAAGCTCTCCGCCTGGGGAGTACGGTCGCAAGATTAAAACTCAAAGGAATTGACGGGGGCCCGCACAAGCGGTGGAGCATGTGGTTTAATTCGAAGCAACGCGCAGAACCTTACCAGCCCTTGACATCCCGATCGCGGTTAGTGGAGACACTTTCCTTCAGTTCGGCTGGATCGGAGACAGGTGCTGCATGGCTGTCGTCAGCTCGTGTCGTGAGATGTTGGGTTAAGTCCCGCAACGAGCGCAACCC	0	1	0	0	1	0.25	9	3	0	0	12	3	20	12	7	30	69	17.25	100	91	136	148	475	118.75	176
Aquicella_1	G	1	0	Compost_2_121534	99.696	100	N	Aquicella	rdp|S000972937;silva|EU160306.1.866	-	-	-	-	-	Bacteria	Proteobacteria	Gammaproteobacteria	Legionellales	Coxiellaceae	Aquicella	Aquicella	Compost_2_121534	GGCTTAGATACCCTGGTAGTCCACGCTGTAAACGATGAGGACTAAAGGTTGGTAGGGGAACCTATCAGTCTTGAAGCTAACGCGATAAGTCTTCCGCCTGGGAAGTACGGCCGCAAGGTTGAAACTCAAAGGAATTGACGGGGGCCCGCACAAGCGGTGGAGCATGTGGTTTAATTCGATGCAACGCGAAGAACCTTACCTACTCTTGACATCCTGCGAATCCGACGTAATGGTTGGAGTGCCGAAAGGAGCGCAGAGACAGGTGCTGCATGGCTGTCGTCAGCTCGTGTTGTGAGATGTTGGGTTAAGTCCCGTAACGAGCGCAACCC	GGATTAGATACCCTGGTAGTNCACGCTGTAAACGATGAGGACTAAAGGTTGGTAGGGGAACCTATCAGTCTTGAAGCTAACGCGATAAGTCTTCCGCCTGGGAAGTACGGCCGCAAGGTTGAAACTCAAAGGAATTGACGGGGGCCCGCACAAGCGGTGGAGCATGTGGTTTAATTCGATGCAACGCGAAGAACCTTACCTACTCTTGACATCCTGCGAATCCGACGTAATGGTTGGAGTGCCGAAAGGAGCGCAGAGACAGGTGCTGCATGGCTGTCGTCAGCTCGTGTTGTGAGATGTTGGGTTAAGTCCCGTAACGAGCGCAACCC	0	0	0	0	0	0	1	1	0	5	7	1.75	4	1	3	0	8	2	4	2	0	2	8	2	2
Aquicella_lusitana_1	S	1	0	Aged_1_156529	100	100	N	Aquicella_lusitana	16SMicrobial|NR_025763.1	Aquicella_lusitana	0	Aquicella_lusitana	nt|NR_025763.1;silva|AY359282.1.1482	100.0/100.0	Bacteria	Proteobacteria	Gammaproteobacteria	Legionellales	Coxiellaceae	Aquicella	Aquicella_lusitana	Aged_1_73327;Aged_1_147306;Aged_1_156529;Aged_1_102822;Aged_2_152555;Aged_1_59763	GGATTAGATACCCTGGTAGTCCACGCTGTAAACGATGAGGACTAGATGTTGATTGGGGAACCAAGCAGTATCGAAGCTAACGCGATAAGTCTTCCGCCTGGGAAGTACGGCCGCAAGGTTGAAACTCAAAGGAATTGACGGGGGCCCGCACAAGCGGTGGAGCATGTGGTTTAATTCGATGCAACGCGAAGAACCTTACCTACCCTTGACATCCTGCGAATCCCGATGAGAGTTGGGAGTGCCGAAAGGAACGCAGAGACAGGTGCTGCATGGCTGTCGTCAGCTCGTGTTGTGAGATGTTGGGTTAAGTCCCGTAACGAGCGCAACCC	GGATTAGATACCCTGGTAGTCCACGCTGTAAACGATGAGGACTAGATGTTGATTGGGGAACCAAGCAGTATCGAAGCTAACGCGATAAGTCTTCCGCCTGGGAAGTACGGCCGCAAGGTTGAAACTCAAAGGAATTGACGGGGGCCCGCACAAGCGGTGGAGCATGTGGTTTAATTCGATGCAACGCGAAGAACCTTACCTACCCTTGACATCCTGCGAATCCCGATGAGAGTTGGGAGTGCCGAAAGGAACGCAGAGACAGGTGCTGCATGGCTGTCGTCAGCTCGTGTTGTGAGATGTTGGGTTAAGTCCCGTAACGAGCGCAACCC	0	0	0	0	0	0	0	0	0	0	0	0	0	0	5	1	6	1.5	5	34	11	4	54	13.5	1
Aquicella_siphonis_1	S	1	0	Aged_1_20209	100	100	N	Aquicella_siphonis	16SMicrobial|NR_025764.1	Aquicella_siphonis	0	Aquicella_siphonis	nt|AY359284.1;silva|AY359283.1.1482	100.0/100.0	Bacteria	Proteobacteria	Gammaproteobacteria	Legionellales	Coxiellaceae	Aquicella	Aquicella_siphonis	Aged_1_20209;Aged_1_133049	GGATTAGATACCCTGGTAGTCCACGCTGTAAACGATGAGGACTAAATGTTGGTAGGGGAACCTATCAGTATTGAAGCTAACGCGATAAGTCTTCCGCCTGGGAAGTACGGCCGCAAGGTTGAAACTCAAATGAATTGACGGGGGCCCGCACAAGCGGTGGAGCATGTGGTTTAATTCGATGCAACGCGAAGAACCTTACCTACCCTTGACATCCTGCGAATCCCGATGAGAGTTGGGAGTGCCGAAAGGAACGCAGAGACAGGTGCTGCATGGCTGTCGTCAGCTCGTGTTGTGAGATGTTGGGTTAAGTCCCGTAACGAGCGCGACCC	GGATTAGATACCCTGGTAGTCCACGCTGTAAACGATGAGGACTAAATGTTGGTAGGGGAACCTATCAGTATTGAAGCTAACGCGATAAGTCTTCCGCCTGGGAAGTACGGCCGCAAGGTTGAAACTCAAATGAATTGACGGGGGCCCGCACAAGCGGTGGAGCATGTGGTTTAATTCGATGCAACGCGAAGAACCTTACCTACCCTTGACATCCTGCGAATCCCGATGAGAGTTGGGAGTGCCGAAAGGAACGCAGAGACAGGTGCTGCATGGCTGTCGTCAGCTCGTGTTGTGAGATGTTGGGTTAAGTCCCGTAACGAGCGCAACCC	0	0	0	0	0	0	0	0	0	0	0	0	0	0	0	0	0	0	23	35	25	44	127	31.75	3
Aquihabitans_1	G	1	0	Aged_1_63404	100	100	N	Aquihabitans	rdp|S002162029	-	-	-	-	-	Bacteria	Actinobacteria	Acidimicrobiia	Acidimicrobiales	Iamiaceae	Aquihabitans	Aquihabitans	Aged_1_83393;Aged_1_63404;Aged_1_38917;Aged_1_159361;Aged_4_153407	GGATTAGATACCCTGGTAGTCCACACCGTAAACGTTGGGCACTAGGTGTGGGGAGGAATCAACCCTTTCCGTGCCGTAGCTAACGCATTAAGTGCCCCGCCTGGGGAGTACGGCCGCAAGGCTAAAACTCAAAGGAATTGACGGGGGCCCGCACAAGCGGCGGAGCATGTTGCTTAATTCGAGGCAACGCGAAGAACCTTACCTAGGTTGAACTACGCAGGAACAGCCACAGAGATGTGGTGTCCTTCGGGGCCTGCGATAGGTGGTGCATGGCTGTCGTCAGCTCGTGTCGTGAGATGTTGGGTTAAGTCCCGCAACGAGCGCAACCC	GGATTAGATACCCTGGTAGTCCACACCGTAAACGTTGGGCACTAGGTGTGGGGAGGAATCAACCCTTTCCGTGCCGTAGCTAACGCATTAAGTGCCCCGCCTGGGGAGTACGGCCGCAAGGCTAAAACTCAAAGGAATTGACGGGGGCCCGCACAAGCGGCGGAGCATGTTGCTTAATTCGAGGCAACGCGAAGAACCTTACCTAGGTTGAACTACGCAGGAACAGCCACAGAGATGTGGTGTCCTTCGGGGCCTGCGATAGGTGGTGCATGGCTGTCGTCAGCTCGTGTCGTGAGATGTTGGGTTAAGTCCCGCAACGAGCGCAACCC	0	0	0	0	0	0	8	0	1	2	11	2.75	14	6	25	30	75	18.75	74	104	72	41	291	72.75	41
Aquihabitans_2	G	1	0	Aged_3_133816	100	100	N	Aquihabitans	rdp|S002696480	-	-	-	-	-	Bacteria	Actinobacteria	Acidimicrobiia	Acidimicrobiales	Iamiaceae	Aquihabitans	Aquihabitans	Aged_3_133816;Aged_3_162973	GGATTAGATACCCTGGTAGTCCACGCCGTAAACGGTGGGCACTAGGTGTGGGATTCACTCAACGGATTCCGTGCCGCAGCTAACGCATTAAGTGCCCCGCCTGGGGAGTACGGCCGCAAGGCTAAAACTCAAAGGAATTGACGGGGGCCCGCACAAGCGGCGGAGCATGTTGCTTAATTCGAGGCAACGCGAAGAACCTTACCTAGGTTTGACATGTACGGAAAAGCTACAGAGATGTGGTGTCCTTCGGGGCCGTACACAGGTGGTGCATGGCTGTCGTCAGCTCGTGTCGTGAGATGTTGGGTTAAGTCCCGCAACGAGCGCAACCC	GGATTAGATACCCTGGTAGTCCACGCCGTAAACGGTGGGCACTAGGTGTGGGATTCACTCAACGGATTCCGTGCCGCAGCTAACGCATTAAGTGCCCCGCCTGGGGAGTACGGCCGCAAGGCTAAAACTCAAAGGAATTGACGGGGGCCCGCACAAGCGGCGGAGCATGTTGCTTAATTCGAGGCAACGCGAAGAACCTTACCTAGGTTTGACATGTACGGAAAAGCTACAGAGATGTGGTGTCCTTCGGGGCCGTACACAGGTGGTGCATGGCTGTCGTCAGCTCGTGTCGTGAGATGTTGGGTTAAGTCCCGCAACGAGCGCAACCC	0	0	0	0	0	0	0	0	0	0	0	0	0	0	2	0	2	0.5	22	7	7	16	52	13	12
Aquihabitans_3	G	1	0	Litter_1_101157	100	100	N	Aquihabitans	rdp|S002721910	-	-	-	-	-	Bacteria	Actinobacteria	Acidimicrobiia	Acidimicrobiales	Iamiaceae	Aquihabitans	Aquihabitans	Litter_1_100161;Litter_1_32937;Litter_1_105084;Litter_1_101157;Litter_1_108352;Litter_1_114070;Compost_2_14503	GGATTAGATACCCTGGTAGTCCACGCCGTAAACGTTGGGCACTAGGTGTGGGGAGGAATCAACCCTTTCCGTGCCGTAGCTAACGCATTAAGTGCCCCGCCTGGGGAGTACGGCCGCAAGGCTAAAACTCAAAGGAATTGACGGGGGCCCGCACAAGCGGCGGAGCATGTTGCTTAATTCGAGGCAACGCGAAGAACCTTACCTGGGTTTGACATGTACCGAAAAGCCATAGAGATATGGTGTCCTTCGGGGCGGTACACAGGTGGTGCATGGCTGTCGTCAGCTCGTGTCGTGAGATGTTGGGTTAAGTCCCGCAACGAGCGCGACCC	GGATTAGATACCCTGGTAGTCCACGCCGTAAACGTTGGGCACTAGGTGTGGGGAGGAATCAACCCTTTCCGTGCCGTAGCTAACGCATTAAGTGCCCCGCCTGGGGAGTACGGCCGCAAGGCTAAAACTCAAAGGAATTGACGGGGGCCCGCACAAGCGGCGGAGCATGTTGCTTAATTCGAGGCAACGCGAAGAACCTTACCTGGGTTTGACATGTACCGAAAAGCCATAGAGATATGGTGTCCTTCGGGGCGGTACACAGGTGGTGCATGGCTGTCGTCAGCTCGTGTCGTGAGATGTTGGGTTAAGTCCCGCAACGAGCGCAACCC	41	56	18	3	118	29.5	86	54	135	193	468	117	279	106	81	110	576	144	39	50	59	104	252	63	46
Archangium_disciforme_1	S	1	0	Aged_1_145404	99.399	100	N	Archangium_disciforme	16SMicrobial|NR_104864.1	-	-	-	-	-	Bacteria	Proteobacteria	Deltaproteobacteria	Myxococcales	Cystobacterineae	Archangium	Archangium_disciforme	Aged_2_134088;Aged_1_145404;Aged_1_130115;Aged_4_157386;Aged_1_118754	GGATTAGATACCCTGGTAGTCCACGCCGTAAACGATGAGAACTAGGTGTCGTGGGAGTTGACCCCCGCGGTGCCGTAGCTAACGCATTAAGTTCTCCGCCTGGGAAGTACGGTCGCAAGACTAAAACTCAAAGGAATTGACGGGGGCCCGCACAAGCGGTGGAGCATGTGGTTTAATTCGACGCAACGCGCAGAACCTTACCTGGTCTTGACATCCTCGGAAAGCCTCAGAGATGAGGAAGTGCCCGCAAGGGAGCCGAGAGACAGGTGCTGCATGGCTGTCGTCAGCTCGTGTCGTGAGATGTTGGGTTAAGTCCCGCAACGAGCGCAACCC	GGATTAGATACCCTGGTAGTCCACGCCGTAAACGATGAGAACTAGGTGTCGTGGGTGTTGACCCCCGCGGTGCCGAAGCTAACGCATTAAGTTCTCCGCCTGGGAAGTACGGTCGCAAGACTAAAACTCAAAGGAATTGACGGGGGCCCGCACAAGCGGTGGAGCATGTGGTTTAATTCGACGCAACGCGCAGAACCTTACCTGGTCTTGACATCCTCGGAAAGCCTCAGAGATGAGGAAGTGCCCGCAAGGGAGCCGAGAGACAGGTGCTGCATGGCTGTCGTCAGCTCGTGTCGTGAGATGTTGGGTTAAGTCCCGCAACGAGCGCAACCC	0	0	0	0	0	0	0	0	0	0	0	0	0	0	0	0	0	0	16	67	51	36	170	42.5	6
Ardenticatena_1	G	13	0	Aged_1_100629	100	100	N	Ardenticatena	rdp|S002163287	-	-	-	-	-	Bacteria	Chloroflexi	Ardenticatenia	Ardenticatenales	Ardenticatenaceae	Ardenticatena	Ardenticatena	Aged_1_10052;Aged_1_109635;Aged_1_100629;Aged_1_100395;Aged_1_28757;Aged_1_127918;Aged_1_108059;Aged_1_101166;Aged_1_100788	GGATTAGATACCCTGGTAGTCCACGCTGTAAACGTTGTGTGCTCGGTTTCTGAGGTATCGACCCCTTGGGAGCCCAAGCGAACGCGAGAAGCACACCGCCTGGGGAGTACGGCCGCAAGGCTAAAACTCAAAGGAATTGACGGGGGCCCGCACAAGCAGCGGAGCGTGTGGTTTAATTCGATGCTACGCGAAGAACCTTACCCGGGCTTGACATGCCGGTGGTAGGGAGCGGAAACGCTTCCGACCTTCGGGAGCCGGCACAGGTGCTGCATGGTTGTCGTCAGCTCGTGCCGTGAGGTGTTGGGTTAAGTCCCGCAACGAGCGCAACCC	GGATTAGATACCCTGGTAGTCCACGCTGTAAACGTTGTGTGCTCGGTTTCTGAGGTATCGACCCCTTGGGAGCCCAAGCGAACGCGAGAAGCACACCGCCTGGGGAGTACGGCCGCAAGGCTAAAACTCAAAGGAATTGACGGGGGCCCGCACAAGCAGCGGAGCGTGTGGTTTAATTCGATGCTACGCGAAGAACCTTACCCGGGCTTGACATGCCGGTGGTAGGGAGCGGAAACGCTTCCGACCTTCGGGAGCCGGCACAGGTGCTGCATGGTTGTCGTCAGCTCGTGCCGTGAGGTGTTGGGTTAAGTCCCGCAACGAGCGCAACCC	2	0	0	0	2	0.5	43	0	7	18	68	17	127	84	50	36	297	74.25	33	12	7	14	66	16.5	8
Ardenticatenales_1	O	2	0	Aged_1_10544	100	100	N	Ardenticatenales	silva|EU037300.1.1465	-	-	-	-	-	Bacteria	Chloroflexi	Ardenticatenia	Ardenticatenales	Ardenticatenales	Ardenticatenales	Ardenticatenales	Aged_1_10544;Aged_1_133450;Aged_1_34507;Aged_1_118805	GGATTAGATACCCCGGTAGTCCACGCCGTAAACGATGGAGACTAGGTGTAGGTGGATAGAACCCCATCTGTGCCGAAGCCAACGCGTTAAGTCTCCCGCCTGGGGAGTACGGCCGCAAGGTTAAAACTCAAAGGAATTGACGGGGGCCCGCACAAGCAGCGGAGCGTGTGGTTTAATTCGATGATACGCGAAGAACCTTACCTGGGTTTGACATACAGGTAGTACCCGACTGAAAAGAAGGGGACCCTTCGGGGAGCCTGTACAGGTGCTGCATGGCTGTCGTCAGCTCGTGTCGTGAGATGTTGGGTTAAGTCCCGCAACGAGCGCAACCC	GGATTAGATACCCCGGTAGTCCACGCCGTAAACGATGGAGACTAGGTGTAGGTGGATAGAACCCCATCTGTGCCGAAGCCAACGCGTTAAGTCTCCCGCCTGGGGAGTACGGCCGCAAGGTTAAAACTCAAAGGAATTGACGGGGGCCCGCACAAGCAGCGGAGCGTGTGGTTTAATTCGATGATACGCGAAGAACCTTACCTGGGTTTGACATACAGGTAGTACCCGACTGAAAAGAAGGGGACCCTTCGGGGAGCCTGTACAGGTGCTGCATGGCTGTCGTCAGCTCGTGTCGTGAGATGTTGGGTTAAGTCCCGCAACGAGCGCAACCC	0	0	0	0	0	0	0	0	0	0	0	0	10	2	3	8	23	5.75	99	149	144	85	477	119.25	20
Ardenticatenales_2	O	2	0	Aged_1_104987	99.699	100	N	Ardenticatenales	silva|HQ120814.1.1450	-	-	-	-	-	Bacteria	Chloroflexi	Ardenticatenia	Ardenticatenales	Ardenticatenales	Ardenticatenales	Ardenticatenales	Aged_1_108069;Aged_1_123216;Aged_1_104987;Aged_1_110209;Aged_1_110180;Aged_1_155198;Aged_1_105603;Aged_1_37977;Aged_1_105301;Aged_1_128106;Aged_1_22823	GGATTAGATACCCCGGTAGTCCACGCCGTAAACGATGGAGACTAGGTGTAGGTGGATAGAACCCCATCTGTGCCGAAGCCAACGCGTTAAGTCTCCCGCCTGGGGAGTACGGCCGCAAGGTTAAAACTCAAAGGAATTGACGGGGGCCCGCACAAGCAGCGGAGCGTGTGGTTTAATTCGATGATACGCGAAGAACCTTACCTGGGTTTGACATACAGGTAGTAGTCGACCGAAAGGAAGACGACCCTTCGGGGAGCCTGAACAGGTGCTGCATGGCTGTCGTCAGCTCGTGTCGTGAGATGTTGGGTTAAGTCCCGCAACGAGCGCAACCC	GGATTAGATACCCAAGTAGTCCACGCCGTAAACGATGGAGACTAGGTGTAGGTGGATAGAACCCCATCTGTGNCGAAGCCAACGCGTTAAGTCTCCCGCCTGGGGAGTACGGCCGCAAGGTTAAAACTCAAAGGAATTGACGGGGGCCCGCACAAGCAGCGGAGCGTGTGGTTTAATTCGATGATACGCGAAGAACCTTACCTGGGTTTGACATACAGGTAGTAGTCGACCGAAAGGAAGACGACCCTTCGGGGAGCCTGAACAGGTGCTGCATGGCTGTCGTCAGCTCGTGTCGTGAGATGTTGGGTTAAGTCCCGAAACGAGCGAAACCC	0	0	0	0	0	0	0	0	0	0	0	0	0	0	1	0	1	0.25	42	44	27	48	161	40.25	28
Arenicellaceae_1	F	2	0	Aged_1_101169	100	100	N	Arenicellaceae	silva|HQ121244.1.1519	-	-	-	-	-	Bacteria	Proteobacteria	Gammaproteobacteria	Arenicellales	Arenicellaceae	Arenicellaceae	Arenicellaceae	Aged_1_103485;Aged_1_118518;Aged_1_100596;Aged_1_121069;Aged_1_101169;Aged_1_100423;Aged_1_38859;Aged_1_140568;Aged_1_103566;Aged_1_113863;Aged_1_107701;Aged_1_12426	GGATTAGATACCCTGGTAGTCCACGCCCTAAACGATGTCGACTAGCCGTTGGGGGAATTAAATCCCTTAGTGGCGCAGCTAACGCGATAAGTCGACCGCCTGGGGAGTACGGCCGCAAGGTTAAAACTCAAAGGAATTGACGGGGGCCCGCACAAGCGGTGGAGCATGTGGTTTAATTCGATGCAACGCGAAGAACCTTACCTGGCCTTGACATGTCTTGGAATCCTCCAGAGATGGGGGAGTGCCCGAAAGGGAACCTTGACACAGGTGCTGCATGGCTGTCGTCAGCTCGTGTCGTGAGATGTTGGGTTAAGTCCCGTAACGAGCGCAACCC	GGATTAGATACCCTGGTAGTCCACGCCCTAAACGATGTCGACTAGCCGTTGGGGGAATTAAATCCCTTAGTGGCGCAGCTAACGCGATAAGTCGACCGCCTGGGGAGTACGGCCGCAAGGTTAAAACTCAAAGGAATTGACGGGGGCCCGCACAAGCGGTGGAGCATGTGGTTTAATTCGATGCAACGCGAAGAACCTTACCTGGCCTTGACATGTCTTGGAATCCTCCAGAGATGGGGGAGTGCCCGAAAGGGAACCTTGACACAGGTGCTGCATGGCTGTCGTCAGCTCGTGTCGTGAGATGTTGGGTTAAGTCCCGTAACGAGCGCAACCC	0	1	6	7	14	3.5	66	33	112	6	217	54.25	1	3	2	2	8	2	8	11	6	1	26	6.5	2
Arenicellaceae_2	F	1	0	Compost_1_101696	100	100	N	Arenicellaceae	silva|KF916831.1.816	-	-	-	-	-	Bacteria	Proteobacteria	Gammaproteobacteria	Arenicellales	Arenicellaceae	Arenicellaceae	Arenicellaceae	Compost_1_101696	GGATTAGATACCCTGGTAGTCCACGCCCTAAACGATGTCGACTAGCCGCTGGAGGAATAAAATCCTTCAGTGGCGCAGCTAACGCGATAAGTCGACCGCCTGGGGAGTACGGCCGCAAGGTTAAAACTCAAAGGAATTGACGGGGGCCCGCACAAGCGGTGGAGCATGTGGTTTAATTCGATGCAACGCGAAGAACCTTACCTGGCCTTGACATCCCGGGAACTTTCCAGAGATGGATTGGTGCCTTCGGGAACCCGGAGACAGGTGCTGCATGGCTGTCGTCAGCTCGTGTCGTGAGATGTTGGGTTAAGTCCCGTAACGAGCGCAACCC	GGATTAGATACCCTGGTAGTCCACGCCCTAAACGATGTCGACTAGCCGCTGGAGGAATAAAATCCTTCAGTGGCGCAGCTAACGCGATAAGTCGACCGCCTGGGGAGTACGGCCGCAAGGTTAAAACTCAAAGGAATTGACGGGGGCCCGCACAAGCGGTGGAGCATGTGGTTTAATTCGATGCAACGCGAAGAACCTTACCTGGCCTTGACATCCCGGGAACTTTCCAGAGATGGATTGGTGCCTTCGGGAACCCGGAGACAGGTGCTGCATGGCTGTCGTCAGCTCGTGTCGTGAGATGTTGGGTTAAGTCCCGTAACGAGCGCAACCC	0	0	0	0	0	0	1	0	1	1	3	0.75	19	2	6	9	36	9	10	6	8	13	37	9.25	6
Arenimonas_1	G	1	0	Aged_3_26844	100	100	N	Arenimonas	rdp|S000477289;silva|AY690260.1.805	-	-	-	-	-	Bacteria	Proteobacteria	Gammaproteobacteria	Xanthomonadales	Xanthomonadaceae	Arenimonas	Arenimonas	Aged_3_26844	GGATTAGATACCCTGGTAGTCCACGCCCTAAACGATGCGAACTGGACGTTGGGAGCAATTAGGCTCTCAGTGTCGAAGCTAACGCGTTAAGTTCGCCGCCTGGGGAGTACGGTCGCAAGACTGAAACTCAAAGGAATTGACGGGGGCCCGCACAAGCGGTGGAGTATGTGGTTTAATTCGATGCAACGCGAAGAACCTTACCTGGCCTTGACATCCACGGAAGTCTGCAGAGATGCGGATGTGCCTTCGGGAACCGTGAGACAGGTGCTGCATGGCTGTCGTCAGCTCGTGTCGTGAGATGTTGGGTTAAGTCCCGCAACGAGCGCAACCC	GGATTAGATACCCTGGTAGTCCACGCCCTAAACGATGCGAACTGGACGTTGGGAGCAATTAGGCTCTCAGTGTCGAAGCTAACGCGTTAAGTTCGCCGCCTGGGGAGTACGGTCGCAAGACTGAAACTCAAAGGAATTGACGGGGGCCCGCACAAGCGGTGGAGTATGTGGTTTAATTCGATGCAACGCGAAGAACCTTACCTGGCCTTGACATCCACGGAAGTCTGCAGAGATGCGGATGTGCCTTCGGGAACCGTGAGACAGGTGCTGCATGGCTGTCGTCAGCTCGTGTCGTGAGATGTTGGGTTAAGTCCCGCAACGAGCGCAACCC	0	0	0	0	0	0	0	0	0	0	0	0	0	1	0	3	4	1	2	1	5	2	10	2.5	0
Arenimonas_2	G	1	0	Compost_1_38527	100	100	N	Arenimonas	rdp|S001262219;silva|FM200860.1.1344	-	-	-	-	-	Bacteria	Proteobacteria	Gammaproteobacteria	Xanthomonadales	Xanthomonadaceae	Arenimonas	Arenimonas	Compost_1_38527	GGATTAGATACCCTGGTAGTCCACGCCCTAAACGATGCGAACTGGACGTTGGGAGCAATTAGGCTCTCAGTGTCGAAGCTAACGCGTTAAGTTCGCCGCCTGGGGAGTACGGTCGCAAGACTGAAACTCAAAGGAATTGACGGGGGCCCGCACAAGCGGTGGAGTATGTGGTTTAATTCGATGCAACGCGAAGAACCTTACCTGGCCTTGACATCCACGGAATCCTTTAGAGATAGAGGAGTGCCTTCGGGAACCGTGAGACAGGTGCTGCATGGCTGTCGTCAGCTCGTGTCGTGAGATGTTGGGTTAAGTCCCGCAACGAGCGCAACCC	GGATTAGATACCCTGGTAGTCCACGCCCTAAACGATGCGAACTGGACGTTGGGAGCAATTAGGCTCTCAGTGTCGAAGCTAACGCGTTAAGTTCGCCGCCTGGGGAGTACGGTCGCAAGACTGAAACTCAAAGGAATTGACGGGGGCCCGCACAAGCGGTGGAGTATGTGGTTTAATTCGATGCAACGCGAAGAACCTTACCTGGCCTTGACATCCACGGAATCCTTTAGAGATAGAGGAGTGCCTTCGGGAACCGTGAGACAGGTGCTGCATGGCTGTCGTCAGCTCGTGTCGTGAGATGTTGGGTTAAGTCCCGCAACGAGCGCAACCC	0	0	0	0	0	0	4	12	11	18	45	11.25	15	5	16	9	45	11.25	2	1	7	14	24	6	3
Arenimonas_3	G	1	0	Compost_1_10496	99.698	100	N	Arenimonas	rdp|S002863861;silva|JF703400.1.1435	-	-	-	-	-	Bacteria	Proteobacteria	Gammaproteobacteria	Xanthomonadales	Xanthomonadaceae	Arenimonas	Arenimonas	Compost_1_10496;Compost_1_173511;Compost_1_136088;Compost_1_107268	GGATTAGATACCCTGGTAGTCCACGCCCTAAACGATGCGGACTGGACGTTGGGCTCAACTAGGAGCTCAGTGTCGAAGCTAACGCGTTAAGTCCGCCGCCTGGGGAGTACGGTCGCAAGACTGAAACTCAAAGGAATTGACGGGGGCCCGCACAAGCGGTGGAGTATGTGGTTTAATTCGATGCAACGCGCAGAACCTTACCTGGCCTTGACATCCACGGAAGCCTTCAGAGATGAGGGTGTGCCTTCGGGAACCGTGAGACAGGTGCTGCATGGCTGTCGTCAGCTCGTGTCGTGAGATGTTGGGTTAAGTCCCGCAACGAGCGCAACCC	GGATTAGATACCCTGGTAGTCCACGCCCTAAACGATGCGGACTGGACGTTGGGCTCAATTAGGAGCTCAGTGTCGAAGCTAACGCGTTAAGTCCGCCGCCTGGGGAGTACGGTCGCAAGACTGAAACTCAAAGGAATTGACGGGGGCCCGCACAAGCGGTGGAGTATGTGGTTTAATTCGATGCAACGCGCAGAACCTTACCTGGCCTTGACATCCACGGAAGCCTTCAGAGATGAGGGTGTGCCTTCGGGAACCGTGAGACAGGTGCTGCATGGCTGTCGTCAGCTCGTGTCGTGAGATGTTGGGTTAAGTCCCGCAACGAGCGCAACCC	0	0	0	0	0	0	1	1	0	0	2	0.5	0	0	1	0	1	0.25	23	17	15	77	132	33	114
Arenimonas_4	G	1	0	Compost_1_122111	99.698	100	N	Arenimonas	silva|JX236699.1.1510	-	-	-	-	-	Bacteria	Proteobacteria	Gammaproteobacteria	Xanthomonadales	Xanthomonadaceae	Arenimonas	Arenimonas	Compost_1_120302;Compost_1_122111;Compost_1_125321;Compost_1_186237	GGATTAGATACCCTGGTAGTCCACGCCCTAAACGATGCGGACTGGACGTTGGGCTCAACTAGGAGCTCAGTGTCGAAGCTAACGCGTTAAGTCCGCCGCCTGGGGAGTACGGTCGCAAGACTGAAACTCAAAGGAATTGACGGGGGCCCGCACAAGCGGTGGAGTATGTGGTTTAATTCGATGCAACGCGCAGAACCTTACCTGGCCTTGACATCCACGGAATCCTTCAGAGATGAGGGAGTGCCTTCGGGAACCGTGAGACAGGTGCTGCATGGCTGTCGTCAGCTCGTGTCGTGAGATGTTGGGTTAAGTCCCGCAACGAGCGCGACCC	GGATTAGATACCCTGGTAGTCCACGCCCTAAACGATGCGGACTGGACGTTGGGCTCAATTAGGAGCTCAGTGTCGAAGCTAACGCGTTAAGTCCGCCGCCTGGGGAGTACGGTCGCAAGACTGAAACTCAAAGGAATTGACGGGGGCCCGCACAAGCGGTGGAGTATGTGGTTTAATTCGATGCAACGCGCAGAACCTTACCTGGCCTTGACATCCACGGAATCCTTCAGAGATGAGGGAGTGCCTTCGGGAACCGTGAGACAGGTGCTGCATGGCTGTCGTCAGCTCGTGTCGTGAGATGTTGGGTTAAGTCCCGCAACGAGCGCAACCC	0	0	0	0	0	0	3	6	0	7	16	4	12	2	8	3	25	6.25	2	5	4	5	16	4	2
Arsenicitalea_1	G	2	0	Aged_1_106578	99.399	100	N	Arsenicitalea	nt|MG232290.1	-	-	-	-	-	Bacteria	Proteobacteria	Alphaproteobacteria	Rhizobiales	Hyphomicrobiaceae	Arsenicitalea	Arsenicitalea	Aged_1_29108;Aged_1_101384;Aged_1_106578;Aged_1_107255;Aged_1_106953;Aged_1_127659;Aged_1_158944	GGATTAGATACCCTGGTAGTCCACGCCGTAAACTATGAGAGCTAGCCGTTGTGGGGTTTACCCCTCAGTGGCGCAGCTAACGCATTAAGCTCTCCGCCTGGGGAGTACGGTCGCAAGATTAAAACTCAAAGGAATTGACGGGGGCCCGCACAAGCGGTGGAGCATGTGGTTTAATTCGAAGCAACGCGAAGAACCTTACCAGCCCTTGACATCCCGGTCGCGGTTTCCAGAGATGGTTACCTTCAGTTCGGCTGGACCGGTGACAGGTGCTGCATGGCTGTCGTCAGCTCGTGTCGTGAGATGTTGGGTTAAGTCCCGCAACGAGCGCAACCC	GGATTAGATACCCTGGTAGTCCACGCCGTAAACTATGAGAGCTAGCCGTTGGGGGGTTTACCCTTCAGTGGCGCAGCTAACGCATTAAGCTCTCCGCCTGGGGAGTACGGTCGCAAGATTAAAACTCAAAGGAATTGACGGGGGCCCGCACAAGCGGTGGAGCATGTGGTTTAATTCGAAGCAACGCGAAGAACCTTACCAGCCCTTGACATCCCGGTCGCGGTTTCCAGAGATGGTTACCTTCAGTTCGGCTGGACCGGTGACAGGTGCTGCATGGCTGTCGTCAGCTCGTGTCGTGAGATGTTGGGTTAAGTCCCGCAACGAGCGCAACCC	0	0	0	0	0	0	0	0	0	0	0	0	0	0	0	0	0	0	23	93	38	35	189	47.25	31
Azoarcus_1	G	2	0	Aged_1_109471	100	100	N	Azoarcus	nt|GU271529.1	-	-	-	-	-	Bacteria	Proteobacteria	Betaproteobacteria	Rhodocyclales	Zoogloeaceae	Azoarcus	Azoarcus	Aged_1_105063;Aged_1_141972;Aged_1_109471;Aged_1_101460;Aged_1_158775;Aged_1_156123;Aged_1_116294;Aged_1_107608	GGATTAGATACCCTGGTAGTCCACGCCCTAAACGATGATGACTAGTTGTTGGGGGAGTTAAATCCCTTAGTAACGCAGCTAACGCGTGAAGTCATCCGCCTGGGGAGTACGGTCGCAAGATTAAAACTCAAAGGAATTGACGGGGGCCCGCACAAGCGGTGGATGATGTGGTTTAATTCGATGCAACGCGAAAAACCTTACCTACCCTTGACATGCCAGGAACGCTCCAGAAATGGGGCGGTGCCCGAAAGGGAACCTGGACACAGGTGCTGCATGGCTGTCGTCAGCTCGTGTCGTGAGATGTTGGGTTAAGTCCCGCAACGAGCGCAACCC	GGATTAGATACCCTGGTAGTCCACGCCCTAAACGATGATGACTAGTTGTTGGGGGAGTTAAATCCCTTAGTAACGCAGCTAACGCGTGAAGTCATCCGCCTGGGGAGTACGGTCGCAAGATTAAAACTCAAAGGAATTGACGGGGGCCCGCACAAGCGGTGGATGATGTGGTTTAATTCGATGCAACGCGAAAAACCTTACCTACCCTTGACATGCCAGGAACGCTCCAGAAATGGGGCGGTGCCCGAAAGGGAACCTGGACACAGGTGCTGCATGGCTGTCGTCAGCTCGTGTCGTGAGATGTTGGGTTAAGTCCCGCAACGAGCGCAACCC	0	0	0	0	0	0	11	1	2	16	30	7.5	39	37	50	18	144	36	13	13	17	21	64	16	11
Azoarcus_2	G	1	0	Litter_1_104160	100	100	N	Azoarcus	rdp|S004110291;silva|KF911281.1.1461	-	-	-	-	-	Bacteria	Proteobacteria	Betaproteobacteria	Rhodocyclales	Zoogloeaceae	Azoarcus	Azoarcus	Aged_3_112558;Litter_1_142096;Litter_1_104160;Litter_1_108564;Litter_1_62294;Litter_1_105668;Litter_1_101582;Litter_1_117863	GGATTAGATACCCTGGTAGTCCACGCCCTAAACGATGTCGACTAGTCGTTCGGAGCGGTAACGTTCTGAGTGACGCAGCTAACGCGTGAAGTCGACCGCCTGGGGAGTACGGTCGCAAGATTAAAACTCAAAGGAATTGACGGGGACCCGCACAAGCGGTGGATGATGTGGATTAATTCGATGCAACGCGAAAAACCTTACCTACCCTTGACATGCCTGGAACTTGGTAGAGATACCTTGGTGCCTTCGGGAGCCAGGACACAGGTGCTGCATGGCTGTCGTCAGCTCGTGTCGTGAGATGTTGGGTTAAGTCCCGCAACGAGCGCAACCC	GGATTAGATACCCTGGTAGTCCACGCCCTAAACGATGTCGACTAGTCGTTCGGAGCGGTAACGTTCTGAGTGACGCAGCTAACGCGTGAAGTCGACCGCCTGGGGAGTACGGTCGCAAGATTAAAACTCAAAGGAATTGACGGGGACCCGCACAAGCGGTGGATGATGTGGATTAATTCGATGCAACGCGAAAAACCTTACCTACCCTTGACATGCCTGGAACTTGGTAGAGATACCTTGGTGCCTTCGGGAGCCAGGACACAGGTGCTGCATGGCTGTCGTCAGCTCGTGTCGTGAGATGTTGGGTTAAGTCCCGCAACGAGCGCAACCC	0	0	0	0	0	0	0	0	0	0	0	0	0	0	0	0	0	0	2	0	0	8	10	2.5	14
Bacillaceae_1	F	4	0	Aged_1_114354	99.7	100	N	Bacillaceae	nt|LC315748.1	-	-	-	-	-	Bacteria	Firmicutes	Bacilli	Bacillales	Bacillaceae	Bacillaceae	Bacillaceae	Aged_2_123396;Aged_3_9328;Aged_1_114354;Aged_1_106326;Aged_1_120820;Aged_3_96752;Aged_1_28019;Aged_1_41658	GGATTAGATACCCTGGTAGTCCACGCCGTAAACGATGAGTGCTAGGTGTTGGGGGGAGTAATCTCCTCAGTGCTGAAGTTAACACATTAAGCACTCCGCCTGGGGAGTACGGCCGCAAGGCTGAAACTCAAAGGAATTGACGGGGGCCCGCACAAGCGGTGGAGCATGTGGTTTAATTCGAAGCAACGCGAAGAACCTTACCAGGTCTTGACATCCCGACGACCGCCATGGAGACATGGCTTTCCCTTTTGGGACGGCGGTGACAGGTGGTGCATGGTTGTCGTCAGCTCGTGTCGTGAGATGTTGGGTTAAGTCCCGCAACGAGCGCAACCC	GGATTAGATACCCTGGTAGTCCACGCCGTAAACGATGAGTGCTAGGTGTTGGGGGGAGYAATCTCCTCAGTGCTGAAGTTAACACATTAAGCACTCCGCCTGGGGAGTACGGCCGCAAGGCTGAAACTCAAAGGAATTGACGGGGGCCCGCACAAGCGGTGGAGCATGTGGTTTAATTCGAAGCAACGCGAAGAACCTTACCAGGTCTTGACATCCCGACGACCGCCATGGAGACATGGCTTTCCCTTTTGGGACGGCGGTGACAGGTGGTGCATGGTTGTCGTCAGCTCGTGTCGTGAGATGTTGGGTTAAGTCCCGCAACGAGCGCAACCC	0	0	0	0	0	0	3	1	5	12	21	5.25	4	15	15	21	55	13.75	5	0	3	9	17	4.25	3
Bacillaceae_2	F	1	0	Aged_1_11452	100	100	N	Bacillaceae	rdp|S001200520	-	-	-	-	-	Bacteria	Firmicutes	Bacilli	Bacillales	Bacillaceae	Bacillaceae	Bacillaceae	Aged_1_18990;Aged_1_11452	GGATTAGATACCCTGGTAGTCCACGCCGTAAACGATGAGTGCTAGGTGTTGGAGGGTTTCCACCCTTCAGTGCTGCAGCTAACGCATTAAGCACTCCGCCTGGGGAGTACGGCCGCAAGGCTGAAACTCAAAGGAATTGACGGGGGCCCGCACAAGCGGTGGAGCATGTGGTTTAATTCGAAGCAACGCGAAGAACCTTACCAGGTCTTGACATCTTCCTGACCGCCTGAGAGATTAGGCTTTCCCTTCGGGGACAGGATGACAGGTGGTGCATGGTTGTCGTCAGCTCGTGTCGTGAGATGTTGGGTTAAGTCCCGCAACGAGCGCAACCC	GGATTAGATACCCTGGTAGTCCACGCCGTAAACGATGAGTGCTAGGTGTTGGAGGGTTTCCACCCTTCAGTGCTGCAGCTAACGCATTAAGCACTCCGCCTGGGGAGTACGGCCGCAAGGCTGAAACTCAAAGGAATTGACGGGGGCCCGCACAAGCGGTGGAGCATGTGGTTTAATTCGAAGCAACGCGAAGAACCTTACCAGGTCTTGACATCTTCCTGACCGCCTGAGAGATTAGGCTTTCCCTTCGGGGACAGGATGACAGGTGGTGCATGGTTGTCGTCAGCTCGTGTCGTGAGATGTTGGGTTAAGTCCCGCAACGAGCGCAACCC	0	0	0	0	0	0	2	0	0	1	3	0.75	0	0	0	4	4	1	14	5	19	2	40	10	12
Bacillaceae_3	F	1	0	Aged_1_105939	99.699	100	N	Bacillaceae	rdp|S002161926	-	-	-	-	-	Bacteria	Firmicutes	Bacilli	Bacillales	Bacillaceae	Bacillaceae	Bacillaceae	Aged_1_63062;Aged_1_105939;Aged_1_31013;Compost_2_7627;Aged_1_48015;Aged_1_91841;Aged_1_102520	GGATTAGATACCCTGGTAGTCCACGCCGTAAACGATGAGTGCTAGGTGTTAGAGGGGTTTACCCTTTAGTGCCGAAGTAAACACGTTAAGCACTCCGCCTGGGGAGTACGGCCGCAAGGCTGAAACTCAAAGGAATTGACGGGGACCCGCACAAGCGGTGGAGCATGTGGTTTAATTCGAAGCAACGCGAAGAACCTTACCAGGTCTTGACATCCCTCTGACCGCTCTAGAGATAGGGCTTCCCCTTCGGGGGCAGAGGTGACAGGTGGTGCATGGTTGTCGTCAGCTCGTGTCGTGAGATGTTGGGTTAAGTCCCGCAACGAGCGCAACCC	GGATTAGATACCCTGGTAGTCCACGCCGTAAACGATGAGTGCTAGGTGTTAGAGGGGTTTACCCTTTAGTGCCGAAGTAAACACGTTAAGCACTCCGCCTGGGGAGTACGGCCGCAAGGCTGAAACTCAAAGGAATTGACGGGGACCCGCACAAGCGGTGGAGCATGTGGTTTAATTCGAAGCAACGCGAAGAACCTTACCAGGTCTTGACATCCCTCTGACCACTCTAGAGATAGGGCTTCCCCTTCGGGGGCAGAGGTGACAGGTGGTGCATGGTTGTCGTCAGCTCGTGTCGTGAGATGTTGGGTTAAGTCCCGCAACGAGCGCAACCC	0	0	0	0	0	0	3	1	0	5	9	2.25	9	7	4	6	26	6.5	39	18	14	20	91	22.75	13
Bacillaceae_4	F	2	0	Aged_1_112455	100	100	N	Bacillaceae	rdp|S002175451	-	-	-	-	-	Bacteria	Firmicutes	Bacilli	Bacillales	Bacillaceae	Bacillaceae	Bacillaceae	Aged_2_32177;Aged_2_99624;Aged_1_112455;Aged_1_134523;Aged_2_49045;Aged_3_104823;Aged_2_37312;Aged_2_145404	GGATTAGATACCCTGGTAGTCCACGCCGTAAACGATGAGTGCTAAGTGTTAGAGGGGTTAACCCTTTAGTGCTGCAGCTAACGCGTTAAGCACTCCGCCTGGGGAGTACGGCCGCAAGGCTGAAACTCAAAGGAATTGACGGGGGCCCGCACAAGCGGTGGAGCATGTGGTTTAATTCGAAGCAACGCGAAGAACCTTACCAGGTCTTGACATCCTCTGCCAACCCTGGAGACAGGGCGTTCCCCTTCGGGGGACAGAGTGACAGGTGGTGCATGGTTGTCGTCAGCTCGTGTCGTGAGATGTTGGGTTAAGTCCCGCAACGAGCGCAACCC	GGATTAGATACCCTGGTAGTCCACGCCGTAAACGATGAGTGCTAAGTGTTAGAGGGGTTAACCCTTTAGTGCTGCAGCTAACGCGTTAAGCACTCCGCCTGGGGAGTACGGCCGCAAGGCTGAAACTCAAAGGAATTGACGGGGGCCCGCACAAGCGGTGGAGCATGTGGTTTAATTCGAAGCAACGCGAAGAACCTTACCAGGTCTTGACATCCTCTGCCAACCCTGGAGACAGGGCGTTCCCCTTCGGGGGACAGAGTGACAGGTGGTGCATGGTTGTCGTCAGCTCGTGTCGTGAGATGTTGGGTTAAGTCCCGCAACGAGCGCAACCC	0	0	0	0	0	0	0	0	0	0	0	0	0	0	0	0	0	0	33	20	53	53	159	39.75	55
Bacillaceae_5	F	1	0	Aged_2_125752	100	100	N	Bacillaceae	rdp|S002283674	-	-	-	-	-	Bacteria	Firmicutes	Bacilli	Bacillales	Bacillaceae	Bacillaceae	Bacillaceae	Aged_3_56730;Aged_2_125752;Compost_3_155352;Aged_3_144771;Compost_3_108848	GGATTAGATACCCTGGTAGTCCACGCCGTAAACGATGAGTGCTAAGTGTTAGAGGGGTTAACCCTTTAGTGCTGCAGCTAACGCGTTAAGCACTCCGCCTGGGGAGTACGGCCGCAAGGCTGAAACTCAAAGGAATTGACGGGGGCCCGCACAAGCGGTGGAGCATGTGGTTTAATTCGAAGCAACGCGAAGAACCTTACCAGGTCTTGACATCCTCTGTCAACCCTGGAGACAGGGCGTTCCCCTTCGGGGGACAGAGTGACAGGTGGTGCATGGTTGTCGTCAGCTCGTGTCGTGAGATGTTGGGTTAAGTCCCGCAACGAGCGCAACCC	GGATTAGATACCCTGGTAGTCCACGCCGTAAACGATGAGTGCTAAGTGTTAGAGGGGTTAACCCTTTAGTGCTGCAGCTAACGCGTTAAGCACTCCGCCTGGGGAGTACGGCCGCAAGGCTGAAACTCAAAGGAATTGACGGGGGCCCGCACAAGCGGTGGAGCATGTGGTTTAATTCGAAGCAACGCGAAGAACCTTACCAGGTCTTGACATCCTCTGTCAACCCTGGAGACAGGGCGTTCCCCTTCGGGGGACAGAGTGACAGGTGGTGCATGGTTGTCGTCAGCTCGTGTCGTGAGATGTTGGGTTAAGTCCCGCAACGAGCGCAACCC	0	0	0	0	0	0	1	0	0	0	1	0.25	0	1	2	6	9	2.25	23	20	37	73	153	38.25	46
Bacillaceae_6	F	1	0	Aged_1_31057	99.099	100	N	Bacillaceae	rdp|S003453547	-	-	-	-	-	Bacteria	Firmicutes	Bacilli	Bacillales	Bacillaceae	Bacillaceae	Bacillaceae	Aged_1_68204;Aged_1_13604;Aged_1_31057;Aged_1_10758;Aged_1_100654;Compost_1_140449	GGATTAGATACCCTGGTAGTCCACGCCGTAAACGATGAGTGCTAGGTGTTAGGGGTTTCGACACCCTTAGTGCCGGCGTTAACACATTAAGCACTCCGCCTGGGGAGTACGGCCGCAAGGCTGAAACTCAAAGGAATTGACGGGGGCCCGCACAAGCAGTGGAGCATGTGGTTTAATTCGAAGCAACGCGAAGAACCTTACCAGGACTTGACATCCTTTGACCGCTCTAGAGATAGAGTCTTCCCCTTCGGGGGACAAAGTGACAGGTGGTGCATGGTTGTCGTCAGCTCGTGTCGTGAGATGTTGGGTTAAGTCCCGCAACGAGCGCAACCC	GGATTAGATACCCTGGTAGTCCACGCCGTAAACGATGAGTGCTAGGTGTTAGGGGTTTCGATACCCTTAGTGCCGGCGTTAACACACTAAGCACTCCGCCTGGGGAGTACGGCCGCAAGGCTGAAACTCAAAGGAATTGACGGGGGCCCGCACAAGCAGTGGAGCATGTGGTTTAATTCGAAGCAACGCGAAGAACCTTACCAGGACTTGACATCCTTTGACCACTCTAGAGATAGAGTCTTCCCCTTCGGGGGACAAAGTGACAGGTGGTGCATGGTTGTCGTCAGCTCGTGTCGTGAGATGTTGGGTTAAGTCCCGCAACGAGCGCAACCC	0	0	0	0	0	0	1	0	1	1	3	0.75	5	1	0	4	10	2.5	55	40	58	85	238	59.5	48
Bacillaceae_7	F	2	0	Aged_1_113439	100	100	N	Bacillaceae	rdp|S004110150	-	-	-	-	-	Bacteria	Firmicutes	Bacilli	Bacillales	Bacillaceae	Bacillaceae	Bacillaceae	Aged_1_131672;Aged_1_126123;Aged_1_113439;Aged_1_107362;Litter_1_117029;Aged_1_40443;Aged_3_91736;Aged_1_160981;Aged_1_101795	GGATTAGATACCCTGGTAGTCCACGCCGTAAACGATGAGTGCTAGGTGTTGGGGGGAGTAATCTCCTCAGTGCTGAAGTTAACACATTAAGCACTCCGCCTGGGGAGTACGGCCGCAAGGCTGAAACTCAAAGGAATTGACGGGGGCCCGCACAAGCGGTGGAGCATGTGGTTTAATTCGAAGCAACGCGAAGAACCTTACCAGGTCTTGACATCCCGTTGACCGGTGCAGAGATGTGCCTTTCCCTTCGGGGACAACGGTGACAGGTGGTGCATGGTTGTCGTCAGCTCGTGTCGTGAGATGTTGGGTTAAGTCCCGCAACGAGCGCAACCC	GGATTAGATACCCTGGTAGTCCACGCCGTAAACGATGAGTGCTAGGTGTTGGGGGGAGTAATCTCCTCAGTGCTGAAGTTAACACATTAAGCACTCCGCCTGGGGAGTACGGCCGCAAGGCTGAAACTCAAAGGAATTGACGGGGGCCCGCACAAGCGGTGGAGCATGTGGTTTAATTCGAAGCAACGCGAAGAACCTTACCAGGTCTTGACATCCCGTTGACCGGTGCAGAGATGTGCCTTTCCCTTCGGGGACAACGGTGACAGGTGGTGCATGGTTGTCGTCAGCTCGTGTCGTGAGATGTTGGGTTAAGTCCCGCAACGAGCGCAACCC	0	0	0	0	0	0	0	6	29	13	48	12	12	93	7	6	118	29.5	47	0	0	3	50	12.5	10
Bacillaceae_MG_3	G	2	2	Aged_1_158998	100	100	N	Bacillus;Sinibacillus	nt|AB084065.1;rdp|S000018205	-	-	-	-	-	Bacteria	Firmicutes	Bacilli	Bacillales	Bacillaceae	Bacillaceae_MG	Bacillaceae_MG	Litter_1_102940;Litter_1_111637;Aged_4_128381;Aged_1_66895;Aged_1_24703;Aged_1_62864;Aged_1_158998;Aged_1_25704;Litter_1_82450;Litter_1_100982;Aged_3_126030;Aged_4_200992;Aged_1_39153;Aged_2_41156;Aged_3_90843;Compost_1_186807;Aged_1_93070	GGATTAGATACCCTGGTAGTCCACGCCGTAAACGATGAGTGCTAGGTGTTAGGGAGTTTCCACTCCTTAGTGCTGCAGTTAACGCATTAAGCACTCCGCCTGGGGAGTACGGCCGCAAGGCTGAAACTCAAAAGAATTGACGGGGGCCCGCACAAGCGGTGGAGCATGTGGTTTAATTCGAAGCTACGCGAAAAACCTTACCAGGTCTTGACATCCCGTTGACCGCCCTAGAGATAGGGTTTTCCCTTCGGGGACAACGGTGACAGGTGGTGCATGGCTGTCGTCAGCTCGTGTCGTGAGATGTTGGGTTAAGTCCCGTAACGAGCGCAACCC	GGATTAGATACCCTGGTAGTCCACGCCGTAAACGATGAGTGCTAGGTGTTAGGGAGTTTCCACTCCTTAGTGCTGCAGTTAACGCATTAAGCACTCCGCCTGGGGAGTACGGCCGCAAGGCTGAAACTCAAAAGAATTGACGGGGGCCCGCACAAGCGGTGGAGCATGTGGTTTAATTCGAAGCTACGCGAAAAACCTTACCAGGTCTTGACATCCCGTTGACCGCCCTAGAGATAGGGTTTTCCCTTCGGGGACAACGGTGACAGGTGGTGCATGGCTGTCGTCAGCTCGTGTCGTGAGATGTTGGGTTAAGTCCCGTAACGAGCGCAACCC	0	1	0	0	1	0.25	2	5	0	0	7	1.75	12	14	10	17	53	13.25	141	49	47	48	285	71.25	55
Bacillaceae_MS_1	S	1	2	Aged_1_57914	100	100	N	Bacillus_thermozeamaize;Caldibacillus_debilis	16SMicrobial|NR_029016.1;16SMicrobial|NR_137401.1	Bacillaceae_MS	2	Bacillus_thermozeamaize;Caldibacillus_debilis	nt|AB548612.1;nt|NR_137401.1;silva|AB548612.1.1409	100.0/100.0	Bacteria	Firmicutes	Bacilli	Bacillales	Bacillaceae	Bacillaceae_MS	Bacillaceae_MS	Aged_1_108133;Aged_2_31505;Aged_1_57914;Aged_1_10226;Aged_1_71125;Aged_1_30123;Aged_1_105907;Aged_2_107689	GGATTAGATACCCTGGTAGTCCACGCCGTAAACGATGAGTGCTAAGTGTTAGAGGGGATTGACCCTTTAGTGCTGCAGCTAACGCATTAAGCACTCCGCCTGGGGAGTACGGCCGCAAGGCTGAAACTCAAAGGAATTGACGGGGGCCCGCACAAGCGGTGGAGCATGTGGTTTAATTCGAAGCAACGCGAAGAACCTTACCAGGTCTTGACATCCCGCTGACCGGTCTGGAGACAGGCCTTTCCCTTATGGGACAGCGGTGACAGGTGGTGCATGGTTGTCGTCAGCTCGTGTCGTGAGATGTTGGGTTAAGTCCCGCAACGAGCGCAACCC	GGATTAGATACCCTGGTAGTCCACGCCGTAAACGATGAGTGCTAAGTGTTAGAGGGGATTGACCCTTTAGTGCTGCAGCTAACGCATTAAGCACTCCGCCTGGGGAGTACGGCCGCAAGGCTGAAACTCAAAGGAATTGACGGGGGCCCGCACAAGCGGTGGAGCATGTGGTTTAATTCGAAGCAACGCGAAGAACCTTACCAGGTCTTGACATCCCGCTGACCGGTCTGGAGACAGGCCTTTCCCTTATGGGACAGCGGTGACAGGTGGTGCATGGTTGTCGTCAGCTCGTGTCGTGAGATGTTGGGTTAAGTCCCGCAACGAGCGCAACCC	0	0	0	0	0	0	0	0	0	2	2	0.5	2	3	3	8	16	4	1	1	1	4	7	1.75	1
Bacillaceae_MS_2	S	1	2	Aged_1_1028	100	100	N	Bacillus_cecembensis;Lysinibacillus_contaminans	16SMicrobial|NR_042648.1;16SMicrobial|NR_109740.1	Bacillales_MS	4	Bacillus_cecembensis;Lysinibacillus_contaminans;Lysinibacillus_sphaericus;Solibacillus_silvestris	nt|KP694230.1;nt|KY038679.1;nt|MF111456.1;silva|KC254732.1.1435;silva|KF312283.1.1419;silva|KP694230.1.1431	100.0/100.0	Bacteria	Firmicutes	Bacilli	Bacillales	Bacillaceae	Bacillaceae_MS	Bacillaceae_MS	Aged_1_144228;Aged_1_121100;Aged_1_1028;Aged_1_133835;Aged_1_147805;Aged_1_90957;Aged_1_11318;Aged_1_125947	GGATTAGATACCCTGGTAGTCCACGCCGTAAACGATGAGTGCTAAGTGTTGGGGGGTTTCCGCCCCTCAGTGCTGCAGCTAACGCATTAAGCACTCCGCCTGGGGAGTACGGTCGCAAGACTGAAACTCAAAGGAATTGACGGGGGCCCGCACAAGCGGTGGAGCATGTGGTTTAATTCGAAGCAACGCGAAGAACCTTACCAGGTCTTGACATCCCATTGACCACTGTAGAGATACAGTTTTCCCTTCGGGGACAACGGTGACAGGTGGTGCATGGTTGTCGTCAGCTCGTGTCGTGAGATGTTGGGTTAAGTCCCGCAACGAGCGCAACCC	GGATTAGATACCCTGGTAGTCCACGCCGTAAACGATGAGTGCTAAGTGTTGGGGGGTTTCCGCCCCTCAGTGCTGCAGCTAACGCATTAAGCACTCCGCCTGGGGAGTACGGTCGCAAGACTGAAACTCAAAGGAATTGACGGGGGCCCGCACAAGCGGTGGAGCATGTGGTTTAATTCGAAGCAACGCGAAGAACCTTACCAGGTCTTGACATCCCATTGACCACTGTAGAGATACAGTTTTCCCTTCGGGGACAACGGTGACAGGTGGTGCATGGTTGTCGTCAGCTCGTGTCGTGAGATGTTGGGTTAAGTCCCGCAACGAGCGCAACCC	0	0	0	0	0	0	13	1	17	24	55	13.75	13	14	29	0	56	14	12	9	14	26	61	15.25	20
Bacillaceae_MS_4	S	2	3	Aged_1_124574	100	100	N	Bacillus_thermoterrestris;Geobacillus_kaustophilus;Parageobacillus_caldoxylosilyticus	nt|AB682661.1;nt|AJ271738.1;nt|FJ823105.2;silva|FJ823105.1.1486	-	-	-	-	-	Bacteria	Firmicutes	Bacilli	Bacillales	Bacillaceae	Bacillaceae_MS	Bacillaceae_MS	Aged_1_55888;Aged_1_57958;Aged_1_124574;Aged_1_107057;Aged_2_105223;Aged_1_107728;Aged_1_120764;Aged_1_142626	GGATTAGATACCCTGGTAGTCCACGCCGTAAACGATGAGTGCTAAGTGTTAGAGGGGTCAAACCCTTTAGTGCTGTAGCTAACGCGTTAAGCACTCCGCCTGGGGAGTACGGCCGCAAGGCTGAAACTCAAAGGAATTGACGGGGGCCCGCACAAGCGGTGGAGCATGTGGTTTAATTCGAAGCAACGCGAAGAACCTTACCAGGTCTTGACATCCCCTGACAACCCTGGAGACAGGGCGTTCCCCCTTCGGGGGGACAGGGTGACAGGTGGTGCATGGTTGTCGTCAGCTCGTGTCGTGAGATGTTGGGTTAAGTCCCGCAACGAGCGCAACCC	GGATTAGATACCCTGGTAGTCCACGCCGTAAACGATGAGTGCTAAGTGTTAGAGGGGTCAAACCCTTTAGTGCTGTAGCTAACGCGTTAAGCACTCCGCCTGGGGAGTACGGCCGCAAGGCTGAAACTCAAAGGAATTGACGGGGGCCCGCACAAGCGGTGGAGCATGTGGTTTAATTCGAAGCAACGCGAAGAACCTTACCAGGTCTTGACATCCCCTGACAACCCTGGAGACAGGGCGTTCCCCCTTCGGGGGGACAGGGTGACAGGTGGTGCATGGTTGTCGTCAGCTCGTGTCGTGAGATGTTGGGTTAAGTCCCGCAACGAGCGCAACCC	0	0	0	0	0	0	0	0	0	0	0	0	0	0	0	1	1	0.25	14	8	25	10	57	14.25	4
Bacillaceae_MS_5	S	1	7	Aged_1_105587	100	100	N	Bacillus_oceanisediminis;Fictibacillus_arsenicus;Fictibacillus_barbaricus;Fictibacillus_halophilus;Fictibacillus_nanhaiensis;Fictibacillus_phosphorivorans;Geobacillus_stearothermophilus	nt|EF636889.1;nt|EU927409.1;nt|JX501687.1;nt|KF241525.1;nt|KT719911.1;nt|KY580805.1;nt|MG651557.1;silva|EF636889.1.897;silva|EU927409.1.1452;silva|JX501687.1.1422;silva|KT719911.1.1422	-	-	-	-	-	Bacteria	Firmicutes	Bacilli	Bacillales	Bacillaceae	Bacillaceae_MS	Bacillaceae_MS	Aged_1_154100;Aged_1_145212;Aged_1_105587;Aged_1_137393;Aged_1_161151;Aged_1_23916;Aged_1_47778;Aged_1_14416	GGATTAGATACCCTGGTAGTCCACGCCGTAAACGATGAGTGCTAGGTGTTGGGGGGTTCCACCCTCAGTGCTGAAGTTAACACATTAAGCACTCCGCCTGGGGAGTACGACCGCAAGGTTGAAACTCAAAGGAATTGACGGGGGCCCGCACAAGCAGTGGAGCATGTGGTTTAATTCGAAGCAACGCGAAGAACCTTACCAGGTCTTGACATCCTCTGACCACTCTAGAGATAGAGCTTTCCCCTTCGGGGGACAGAGTGACAGGTGGTGCATGGTTGTCGTCAGCTCGTGTCGTGAGATGTTGGGTTAAGTCCCGCAACGAGCGCAACCC	GGATTAGATACCCTGGTAGTCCACGCCGTAAACGATGAGTGCTAGGTGTTGGGGGGTTCCACCCTCAGTGCTGAAGTTAACACATTAAGCACTCCGCCTGGGGAGTACGACCGCAAGGTTGAAACTCAAAGGAATTGACGGGGGCCCGCACAAGCAGTGGAGCATGTGGTTTAATTCGAAGCAACGCGAAGAACCTTACCAGGTCTTGACATCCTCTGACCACTCTAGAGATAGAGCTTTCCCCTTCGGGGGACAGAGTGACAGGTGGTGCATGGTTGTCGTCAGCTCGTGTCGTGAGATGTTGGGTTAAGTCCCGCAACGAGCGCAACCC	0	0	0	0	0	0	16	64	47	50	177	44.25	78	54	36	2361	2529	632.25	28	78	45	149	300	75	62
Bacillaceae_MS_6	S	2	2	Aged_2_17394	100	100	Y	Bacillus_ndiopicus;Lysinibacillus_sphaericus	nt|MH463090.1;silva|EU571104.1.1419	-	-	-	-	-	Bacteria	Firmicutes	Bacilli	Bacillales	Bacillaceae	Bacillaceae_MS	Bacillaceae_MS	Aged_1_132020;Aged_2_34020;Aged_2_17394;Aged_2_141592;Aged_2_133112;Aged_1_101405;Aged_2_30733;Aged_1_101211	GGATTAGATACCCTGGTAGTCCACGCCGTAAACGATGAGTGCTAAGTGTTAGGGGGTTTCCGCCCCTTAGTGCTGCAGCTAACGCATTAAGCACTCCGCCTGGGGAGTACGGTCGCAAGACTGAAACTCAAAGGAATTGACGGGGGCCCGCACAAGCGGTGGAGCATGTGGTTTAATTCGAAGCAACGCGAAGAACCTTACCAGGTCTTGACATCCCGCTGACCGCTATGGAGACATAGCCTTCCCTTCGGGGACAGCGGTGACAGGTGGTGCATGGTTGTCGTCAGCTCGTGTCGTGAGATGTTGGGTTAAGTCCCGCAACGAGCGCAACCC	GGATTAGATACCCTGGTAGTCCACGCCGTAAACGATGAGTGCTAAGTGTTAGGGGGTTTCCGCCCCTTAGTGCTGCAGCTAACGCATTAAGCACTCCGCCTGGGGAGTACGGTCGCAAGACTGAAACTCAAAGGAATTGACGGGGGCCCGCACAAGCGGTGGAGCATGTGGTTTAATTCGAAGCAACGCGAAGAACCTTACCAGGTCTTGACATCCCGCTGACCGCTATGGAGACATAGCCTTCCCTTCGGGGACAGCGGTGACAGGTGGTGCATGGTTGTCGTCAGCTCGTGTCGTGAGATGTTGGGTTAAGTCCCGCAACGAGCGCAACCC	0	0	0	0	0	0	0	0	0	0	0	0	1	0	0	5	6	1.5	138	136	167	205	646	161.5	14
Bacillales_1	O	5	0	Aged_1_100777	100	100	N	Bacillales	rdp|S000561223;silva|AB034711.1.1472	-	-	-	-	-	Bacteria	Firmicutes	Bacilli	Bacillales	Bacillales	Bacillales	Bacillales	Aged_1_104979;Aged_1_28607;Aged_1_100777;Aged_1_123347;Aged_3_166766;Aged_1_70167;Aged_1_125384;Aged_1_15146;Aged_1_100899;Aged_1_122579	GGATTAGATACCCTGGTAGTCCACGCCGTAAACGATGAGTGCTAAGTGTTAGGGGGTTTCCGCCCCTTAGTGCTGCAGCTAACGCATTAAGCACTCCGCCTGGGGAGTACGGCCGCAAGGCTGAAACTCAAAGGAATTGACGGGGGCCCGCACAAGCGGTGGAGCATGTGGTTTAATTCGAAGCAACGCGAAGAACCTTACCAGGTCTTGACATCTCCTGACCGCCCTGGAGACAGGGTCTTCCCTTCGGGGACAGGATGACAGGTGGTGCATGGTTGTCGTCAGCTCGTGTCGTGAGATGTTGGGTTAAGTCCCGCAACGAGCGCAACCC	GGATTAGATACCCTGGTAGTCCACGCCGTAAACGATGAGTGCTAAGTGTTAGGGGGTTTCCGCCCCTTAGTGCTGCAGCTAACGCATTAAGCACTCCGCCTGGGGAGTACGGCCGCAAGGCTGAAACTCAAAGGAATTGACGGGGGCCCGCACAAGCGGTGGAGCATGTGGTTTAATTCGAAGCAACGCGAAGAACCTTACCAGGTCTTGACATCTCCTGACCGCCCTGGAGACAGGGTCTTCCCTTCGGGGACAGGATGACAGGTGGTGCATGGTTGTCGTCAGCTCGTGTCGTGAGATGTTGGGTTAAGTCCCGCAACGAGCGCAACCC	0	0	0	0	0	0	0	0	0	0	0	0	1	0	0	1	2	0.5	64	70	55	99	288	72	24
Bacillales_10	O	4	0	Aged_1_104773	100	100	N	Bacillales	rdp|S002163286	-	-	-	-	-	Bacteria	Firmicutes	Bacilli	Bacillales	Bacillales	Bacillales	Bacillales	Aged_2_101022;Aged_1_131951;Aged_1_104773;Aged_1_16189;Aged_2_97223;Aged_2_57866;Aged_1_128414;Aged_1_149914	GGATTAGATACCCTGGTAGTCCACGCCGTAAACGATGAGTGCCAGGTGTTGCGGGGGTTTACCCTGCGGTGCCGAAGGAAACCCAATAAGCACTCCGCCTGGGGAGTACGGCCGCAAGGCTGAAACTCAAAGGAATTGACGGGGACCCGCACAAGCAGTGGAGCATGTGGTTTAATTCGAAGCAACGCGAAGAACCTTACCAGGCCTTGACATCCCCCTGAATGTGCCAGAGATGGCGCAGGCCTTTCCTTTGGGGAGGACAGGGGAGACAGGTGGTGCATGGTTGTCGTCAGCTCGTGTCGTGAGATGTTGGGTTAAGTCCCGCAACGAGCGCAACCC	GGATTAGATACCCTGGTAGTCCACGCCGTAAACGATGAGTGCCAGGTGTTGCGGGGGTTTACCCTGCGGTGCCGAAGGAAACCCAATAAGCACTCCGCCTGGGGAGTACGGCCGCAAGGCTGAAACTCAAAGGAATTGACGGGGACCCGCACAAGCAGTGGAGCATGTGGTTTAATTCGAAGCAACGCGAAGAACCTTACCAGGCCTTGACATCCCCCTGAATGTGCCAGAGATGGCGCAGGCCTTTCCTTTGGGGAGGACAGGGGAGACAGGTGGTGCATGGTTGTCGTCAGCTCGTGTCGTGAGATGTTGGGTTAAGTCCCGCAACGAGCGCAACCC	0	0	0	0	0	0	0	0	0	0	0	0	0	0	2	2	4	1	48	33	14	18	113	28.25	9
Bacillales_2	O	2	0	Aged_1_159214	100	100	N	Bacillales	rdp|S000973051;silva|EU160420.1.872	-	-	-	-	-	Bacteria	Firmicutes	Bacilli	Bacillales	Bacillales	Bacillales	Bacillales	Aged_1_159214;Aged_1_160329;Aged_1_102867;Aged_1_127802	GGATTAGATACCCTGGTAGTCCACGCCGTAAACGATGAGTGCTAGGTGTTAGGGGTTTTTACACCCTTAGTGCCGTCGTTAACACATTAAGCACTCCGCCTGGGGAGTACGGCCGCAAGGCTGAAACTCAAAGGAATTGACGGGGGCCCGCACAAGCAGTGGAGCATGTGGTTTAATTCGAAGCAACGCGAAGAACCTTACCAGGACTTGACATCCTTTGACCGCTCTAGAGATAGGGCTTTCCCCTTCGGGGGACAAAGTGACAGGTGGTGCATGGTTGTCGTCAGCTCGTGTCGTGAGATGTTGGGTTAAGTCCCGCAACGAGCGCAACCC	GGATTAGATACCCTGGTAGTCCACGCCGTAAACGATGAGTGCTAGGTGTTAGGGGTTTTTACACCCTTAGTGCCGTCGTTAACACATTAAGCACTCCGCCTGGGGAGTACGGCCGCAAGGCTGAAACTCAAAGGAATTGACGGGGGCCCGCACAAGCAGTGGAGCATGTGGTTTAATTCGAAGCAACGCGAAGAACCTTACCAGGACTTGACATCCTTTGACCGCTCTAGAGATAGGGCTTTCCCCTTCGGGGGACAAAGTGACAGGTGGTGCATGGTTGTCGTCAGCTCGTGTCGTGAGATGTTGGGTTAAGTCCCGCAACGAGCGCAACCC	0	0	0	0	0	0	1	0	1	1	3	0.75	2	1	6	1	10	2.5	15	18	8	17	58	14.5	9
Bacillales_3	O	1	0	Aged_1_72887	100	100	N	Bacillales	rdp|S001086642;silva|EU634139.1.798	-	-	-	-	-	Bacteria	Firmicutes	Bacilli	Bacillales	Bacillales	Bacillales	Bacillales	Aged_4_109277;Aged_1_72887	GGCTTAGATACCCTGGTAGTCCACGCCGTAAACGATGAGTGCTAGGTGTTAGTGGGGCTACCCATTAGTGCCGAAGGAAACCCAATAAGCACTCCGCCTGGGGAGTACGGCCGCAAGGCTGAAACTCAAAGGAATTGACGGGGGCCCGCACAAGCAGTGGAGCATGTGGTTTAATTCGAAGCAACGCGAAGAACCTTACCAGGGCTTGACATCCCGCTGACCGGCGCAGAGATGTGCCTTTTCCTTCGGGGACAGCGGAGACAGGTGGTGCATGGTTGTCGTCAGCTCGTGTCGTGAGATGTTGGGTTAAGTCCCGCAACGAGCGCAACCC	GGATTAGATACCCTGGTAGTCCACGCCGTAAACGATGAGTGCTAGGTGTTAGTGGGGCTACCCATTAGTGCCGAAGGAAACCCAATAAGCACTCCGCCTGGGGAGTACGGCCGCAAGGCTGAAACTCAAAGGAATTGACGGGGGCCCGCACAAGCAGTGGAGCATGTGGTTTAATTCGAAGCAACGCGAAGAACCTTACCAGGGCTTGACATCCCGCTGACCGGCGCAGAGATGTGCCTTTTCCTTCGGGGACAGCGGAGACAGGTGGTGCATGGTTGTCGTCAGCTCGTGTCGTGAGATGTTGGGTTAAGTCCCGCAACGAGCGCAACCC	0	0	0	0	0	0	1	0	0	0	1	0.25	4	7	2	2	15	3.75	30	12	42	75	159	39.75	34
Bacillales_4	O	2	0	Aged_1_145316	100	100	N	Bacillales	rdp|S002161754	-	-	-	-	-	Bacteria	Firmicutes	Bacilli	Bacillales	Bacillales	Bacillales	Bacillales	Aged_1_83801;Aged_2_132154;Aged_1_145316;Middle_1_54772;Aged_2_29515;Litter_1_125197;Aged_4_101361;Aged_1_133620	GGATTAGATACCCTGGTAGTCCACGCCGTAAACGATGAGTGCTAGGTGTTGGGGGGAGTAATCTCCTCAGTGCTGAAGTTAACACGTTAAGCACTCCGCCTGGGGAGTACGGCCGCAAGGCTGAAACTCAAAGGAATTGACGGGGGCCCGCACAAGCGGTGGAGCATGTGGTTTAATTCGAAGCAACGCGAAGAACCTTACCAGGTCTTGACATCCCGATGACCGCCCTAGAGATAGGGCTTTCCCGTTTGGGACATCGGTGACAGGTGGTGCATGGTTGTCGTCAGCTCGTGTCGTGAGATGTTGGGTTAAGTCCCGCAACGAGCGCAACCC	GGATTAGATACCCTGGTAGTCCACGCCGTAAACGATGAGTGCTAGGTGTTGGGGGGAGTAATCTCCTCAGTGCTGAAGTTAACACGTTAAGCACTCCGCCTGGGGAGTACGGCCGCAAGGCTGAAACTCAAAGGAATTGACGGGGGCCCGCACAAGCGGTGGAGCATGTGGTTTAATTCGAAGCAACGCGAAGAACCTTACCAGGTCTTGACATCCCGATGACCGCCCTAGAGATAGGGCTTTCCCGTTTGGGACATCGGTGACAGGTGGTGCATGGTTGTCGTCAGCTCGTGTCGTGAGATGTTGGGTTAAGTCCCGCAACGAGCGCAACCC	10	0	1	2	13	3.25	34	5	8	24	71	17.75	32	29	61	34	156	39	19	100	17	16	152	38	4
Bacillales_5	O	1	0	Aged_1_83949	99.701	100	N	Bacillales	rdp|S002161761	-	-	-	-	-	Bacteria	Firmicutes	Bacilli	Bacillales	Bacillales	Bacillales	Bacillales	Aged_1_50189;Aged_1_63524;Aged_1_83949;Aged_1_47302;Compost_2_57843;Aged_1_29186;Aged_1_151479;Aged_1_16601	GGATTAGATACCCTGGTAGTCCACGCCGTAAACGATGAGTGCTAGGTGTTAGGGGTTTCGATACCCTTAGTGCCGAAGTTAACACATTAAGCACTCCGCCTGGGGAGTACGGCCGCAAGGCTGAAACTCAAAGGAATTGACGGGGGCCCGCACAAGCAGTGGAGCATGTGGTTTAATTCGAAGCAACGCGAAGAACCTTACCAGGTCTTGACATCCCGATGACCGCTCTAGAGATAGGGCTTTCCCCTTCGGGGGACATCGGTGACAGGTGGTGCATGGTTGTCGTCAGCTCGTGTCGTGAGATGTTGGGTTAAGTCCCGCAACGAGCGCAACCC	GGATTAGATACCCTGGTAGTCCACGCCGTAAACGATGAGTGCTAGGTGTTAGGGGTTTCGATACTCTTAGTGCCGAAGTTAACACATTAAGCACTCCGCCTGGGGAGTACGGCCGCAAGGCTGAAACTCAAAGGAATTGACGGGGGCCCGCACAAGCAGTGGAGCATGTGGTTTAATTCGAAGCAACGCGAAGAACCTTACCAGGTCTTGACATCCCGATGACCGCTCTAGAGATAGGGCTTTCCCCTTCGGGGGACATCGGTGACAGGTGGTGCATGGTTGTCGTCAGCTCGTGTCGTGAGATGTTGGGTTAAGTCCCGCAACGAGCGCAACCC	1	0	0	0	1	0.25	10	9	6	11	36	9	42	17	20	12	91	22.75	2	8	9	6	25	6.25	12
Bacillales_6	O	3	0	Aged_1_128456	100	100	N	Bacillales	rdp|S002161995	-	-	-	-	-	Bacteria	Firmicutes	Bacilli	Bacillales	Bacillales	Bacillales	Bacillales	Aged_1_4812;Aged_4_118058;Aged_1_128456;Aged_1_22688;Aged_1_61712;Aged_2_153339;Aged_1_102049;Aged_2_115853	GGATTAGATACCCTGGTAGTCCACGCCGTAAACGATGAGTGCTAGGTGTTAGTGGGGTTACCCATTAGTGCCGAAGGAAACCCAATAAGCACTCCGCCTGGGGAGTACGGCCGCAAGGCTGAAACTCAAAGGAATTGACGGGGGCCCGCACAAGCAGTGGAGCATGTGGTTTAATTCGAAGCAACGCGAAGAACCTTACCAGGGCTTGACATCCCGCTGACCGGGCCAGAGATGGTCCTTTCCCGTTTGGGACAGCGGAGACAGGTGGTGCATGGTTGTCGTCAGCTCGTGTCGTGAGATGTTGGGTTAAGTCCCGCAACGAGCGCAACCC	GGATTAGATACCCTGGTAGTCCACGCCGTAAACGATGAGTGCTAGGTGTTAGTGGGGTTACCCATTAGTGCCGAAGGAAACCCAATAAGCACTCCGCCTGGGGAGTACGGCCGCAAGGCTGAAACTCAAAGGAATTGACGGGGGCCCGCACAAGCAGTGGAGCATGTGGTTTAATTCGAAGCAACGCGAAGAACCTTACCAGGGCTTGACATCCCGCTGACCGGGCCAGAGATGGTCCTTTCCCGTTTGGGACAGCGGAGACAGGTGGTGCATGGTTGTCGTCAGCTCGTGTCGTGAGATGTTGGGTTAAGTCCCGCAACGAGCGCAACCC	0	0	0	0	0	0	0	0	0	0	0	0	7	1	3	6	17	4.25	15	21	23	20	79	19.75	15
Bacillales_7	O	1	0	Aged_1_100481	100	100	N	Bacillales	rdp|S002162020	-	-	-	-	-	Bacteria	Firmicutes	Bacilli	Bacillales	Bacillales	Bacillales	Bacillales	Aged_4_60368;Aged_1_143713;Aged_1_100481;Aged_3_54541;Aged_1_5995;Compost_1_79150	GGATTAGATACCCTGGTAGTCCACGCCGTAAACGATGAGTGCTAGGTGTTGGGGGGAGCAATCTCCTCAGTGCTGAAGTTAACACATTAAGCACTCCGCCTGGGGAGTACGGCCGCAAGGCTGAAACTCAAAGGAATTGACGGGGGCCCGCACAAGCGGTGGAGCATGTGGTTTAATTCGAAGCAACGCGAAGAACCTTACCAGGTCTTGACATCCCGATGACCGCCCTAGAGATAGGGCTTTCCCGTTTGGGACATCGGTGACAGGTGGTGCATGGTTGTCGTCAGCTCGTGTCGTGAGATGTTGGGTTAAGTCCCGCAACGAGCGCAACCC	GGATTAGATACCCTGGTAGTCCACGCCGTAAACGATGAGTGCTAGGTGTTGGGGGGAGCAATCTCCTCAGTGCTGAAGTTAACACATTAAGCACTCCGCCTGGGGAGTACGGCCGCAAGGCTGAAACTCAAAGGAATTGACGGGGGCCCGCACAAGCGGTGGAGCATGTGGTTTAATTCGAAGCAACGCGAAGAACCTTACCAGGTCTTGACATCCCGATGACCGCCCTAGAGATAGGGCTTTCCCGTTTGGGACATCGGTGACAGGTGGTGCATGGTTGTCGTCAGCTCGTGTCGTGAGATGTTGGGTTAAGTCCCGCAACGAGCGCAACCC	0	0	0	0	0	0	0	0	0	0	0	0	1	2	1	13	17	4.25	117	321	158	279	875	218.75	63
Bacillales_8	O	2	0	Aged_1_110662	100	100	N	Bacillales	rdp|S002162056	-	-	-	-	-	Bacteria	Firmicutes	Bacilli	Bacillales	Bacillales	Bacillales	Bacillales	Aged_1_140663;Aged_2_7939;Aged_1_110662;Aged_1_150590;Aged_1_112746;Aged_3_170884;Aged_1_115792;Aged_1_111358	GGATTAGATACCCTGGTAGTCCACGCTGTAAACGATGAGTGCTAGGTGTTAGTGGGGTTTGACCCATTAGTGCCGAAGGTAACCCAATAAGCACTCCGCCTGGGGAGTACGGCCGCAAGGCTGAAACTCAAAGGAATTGACGGGGGCCCGCACAAGCAGTGGAGCATGTGGTTTAATTCGAAGCAACGCGAAGAACCTTACCAGGGCTTGACATCCCGCTGACCGGGCCAGAGATGGTCCTTTCCCCGTTTTGGGGACAGCGGTGACAGGTGGTGCATGGTTGTCGTCAGCTCGTGTCGTGAGATGTTGGGTTAAGTCCCGCAACGAGCGCAACCC	GGATTAGATACCCTGGTAGTCCACGCTGTAAACGATGAGTGCTAGGTGTTAGTGGGGTTTGACCCATTAGTGCCGAAGGTAACCCAATAAGCACTCCGCCTGGGGAGTACGGCCGCAAGGCTGAAACTCAAAGGAATTGACGGGGGCCCGCACAAGCAGTGGAGCATGTGGTTTAATTCGAAGCAACGCGAAGAACCTTACCAGGGCTTGACATCCCGCTGACCGGGCCAGAGATGGTCCTTTCCCCGTTTTGGGGACAGCGGTGACAGGTGGTGCATGGTTGTCGTCAGCTCGTGTCGTGAGATGTTGGGTTAAGTCCCGCAACGAGCGCAACCC	0	0	0	0	0	0	1	0	0	0	1	0.25	1	0	1	4	6	1.5	19	33	22	21	95	23.75	29
Bacillales_9	O	2	0	Aged_1_113173	100	100	N	Bacillales	rdp|S002162100	-	-	-	-	-	Bacteria	Firmicutes	Bacilli	Bacillales	Bacillales	Bacillales	Bacillales	Aged_1_114828;Aged_1_110233;Aged_1_113173;Aged_1_111221;Aged_1_153147;Aged_1_160973;Aged_1_119772;Aged_1_105704	GGATTAGATACCCTGGTAGTCCACGCTGTAAACGATGAGTGCTAGGTGTTAGTGGGGTTTGACCCATTAGTGCCGAAGGTAACCCAATAAGCACTCCGCCTGGGGAGTACGGCCGCAAGGCTGAAACTCAAAGGAATTGACGGGGGCCCGCACAAGCAGTGGAGCATGTGGTTTAATTCGAAGCAACGCGAAGAACCTTACCAGGGCTTGACATCCCGCTGACCGGGCCAGAGATGGTCCTTTCCCCGTCTGGGGACAGCGGTGACAGGTGGTGCATGGTTGTCGTCAGCTCGTGTCGTGAGATGTTGGGTTAAGTCCCGCAACGAGCGCAACCC	GGATTAGATACCCTGGTAGTCCACGCTGTAAACGATGAGTGCTAGGTGTTAGTGGGGTTTGACCCATTAGTGCCGAAGGTAACCCAATAAGCACTCCGCCTGGGGAGTACGGCCGCAAGGCTGAAACTCAAAGGAATTGACGGGGGCCCGCACAAGCAGTGGAGCATGTGGTTTAATTCGAAGCAACGCGAAGAACCTTACCAGGGCTTGACATCCCGCTGACCGGGCCAGAGATGGTCCTTTCCCCGTCTGGGGACAGCGGTGACAGGTGGTGCATGGTTGTCGTCAGCTCGTGTCGTGAGATGTTGGGTTAAGTCCCGCAACGAGCGCAACCC	0	0	0	0	0	0	24	0	3	9	36	9	13	6	5	6	30	7.5	42	23	25	24	114	28.5	19
Bacillales_MG_11	G	2	3	Aged_1_102599	100	100	N	Bacillus;Paenibacillus;Thermobacillus	nt|MG651127.1;rdp|S001200465;silva|AM930274.1.1522	-	-	-	-	-	Bacteria	Firmicutes	Bacilli	Bacillales	Bacillales_MG	Bacillales_MG	Bacillales_MG	Aged_1_132853;Aged_1_18025;Aged_1_102599;Aged_1_107510;Aged_1_98857;Aged_1_42800;Aged_1_105504;Aged_1_3867	GGATTAGATACCCTGGTAGTCCACGCCGTAAACGATGAATGCTAGGTGTCAGGGGTTATGACACCCTTGGTGCCGAAGTTAACACATTAAGCATTCCGCCTGGGGAGTACGGTCGCAAGACTGAAACTCAAAGGAATTGACGGGGACCCGCACAAGCAGTGGAGTATGTGGTTTAATTCGAAGCAACGCGAAGAACCTTACCAGGTCTTGACATCCCTCTGACCGGTGCAGAGATGCATCTTTCCTTCGGGACAGAGGTGACAGGTGGTGCATGGTTGTCGTCAGCTCGTGTCGTGAGATGTTGGGTTAAGTCCCGCAACGAGCGCAACCC	GGATTAGATACCCTGGTAGTCCACGCCGTAAACGATGAATGCTAGGTGTCAGGGGTTATGACACCCTTGGTGCCGAAGTTAACACATTAAGCATTCCGCCTGGGGAGTACGGTCGCAAGACTGAAACTCAAAGGAATTGACGGGGACCCGCACAAGCAGTGGAGTATGTGGTTTAATTCGAAGCAACGCGAAGAACCTTACCAGGTCTTGACATCCCTCTGACCGGTGCAGAGATGCATCTTTCCTTCGGGACAGAGGTGACAGGTGGTGCATGGTTGTCGTCAGCTCGTGTCGTGAGATGTTGGGTTAAGTCCCGCAACGAGCGCAACCC	0	0	0	0	0	0	0	0	0	0	0	0	1	1	1	9	12	3	223	238	219	290	970	242.5	258
Bacillales_MG_12	G	1	3	Aged_4_187834	100	100	N	Caryophanon;Lysinibacillus;Solibacillus	rdp|S001065118;rdp|S001066058;silva|EU465894.1.1415;silva|EU466019.1.1413	-	-	-	-	-	Bacteria	Firmicutes	Bacilli	Bacillales	Bacillales_MG	Bacillales_MG	Bacillales_MG	Litter_1_105660;Aged_4_187834	GGATTAGATACCCTGGTAGTCCACGCCGTAAACGATGAGTGCTAAGTGTTGGGGGGTTTCCGCCCCTCAGTGCTGCAGCTAACGCATTAAGCACTCCGCCTGGGGAGTACGCACGCAAGTGTGAAACTCAAAGGAATTGACGGGGGCCCGCACAAGCGGTGGAGCATGTGGTTTAATTCGAAGCAACGCGAAGAACCTTACCAGGTCTTGACATCCCATTGACCACTGTAGAGATACAGTTTTCCCTTCGGGGACAACGGTGACAGGTGGTGCATGGTTGTCGTCAGCTCGTGTCGTGAGATGTTGGGTTAAGTCCCGCAACGAGCGCGACCC	GGATTAGATACCCTGGTAGTCCACGCCGTAAACGATGAGTGCTAAGTGTTGGGGGGTTTCCGCCCCTCAGTGCTGCAGCTAACGCATTAAGCACTCCGCCTGGGGAGTACGCACGCAAGTGTGAAACTCAAAGGAATTGACGGGGGCCCGCACAAGCGGTGGAGCATGTGGTTTAATTCGAAGCAACGCGAAGAACCTTACCAGGTCTTGACATCCCATTGACCACTGTAGAGATACAGTTTTCCCTTCGGGGACAACGGTGACAGGTGGTGCATGGTTGTCGTCAGCTCGTGTCGTGAGATGTTGGGTTAAGTCCCGCAACGAGCGCAACCC	0	0	0	0	0	0	6	0	0	0	6	1.5	1	1	2	0	4	1	25	5	7	11	48	12	29
Bacillales_MG_4	G	5	2	Aged_1_107266	100	100	N	Bacillus;Thermobacillus	nt|EF165014.1;silva|AM930289.1.1524	-	-	-	-	-	Bacteria	Firmicutes	Bacilli	Bacillales	Bacillales_MG	Bacillales_MG	Bacillales_MG	Aged_1_110295;Aged_1_110310;Aged_1_107266;Aged_1_104959;Aged_1_129756;Aged_1_116844;Aged_1_125564;Aged_1_115131	GGATTAGATACCCTGGTAGTCCACGCCGTAAACGATGAATGCTAGGTGTCAGGGGCGTAAGAGCCCTTGGTGCCGAAGTTAACACATTAAGCATTCCGCCTGGGGAGTACGGTCGCAAGACTGAAACTCAAAGGAATTGACGGGGACCCGCACAAGCAGTGGAGCATGTGGTTTAATTCGAAGCAACGCGAAGAACCTTACCAGGTCTTGACATCCCTCTGACCGGTCTAGAGATAGGCCTTTCCTTCGGGACAGAGGAGACAGGTGGTGCATGGTTGTCGTCAGCTCGTGTCGTGAGATGTTGGGTTAAGTCCCGCAACGAGCGCAACCC	GGATTAGATACCCTGGTAGTCCACGCCGTAAACGATGAATGCTAGGTGTCAGGGGCGTAAGAGCCCTTGGTGCCGAAGTTAACACATTAAGCATTCCGCCTGGGGAGTACGGTCGCAAGACTGAAACTCAAAGGAATTGACGGGGACCCGCACAAGCAGTGGAGCATGTGGTTTAATTCGAAGCAACGCGAAGAACCTTACCAGGTCTTGACATCCCTCTGACCGGTCTAGAGATAGGCCTTTCCTTCGGGACAGAGGAGACAGGTGGTGCATGGTTGTCGTCAGCTCGTGTCGTGAGATGTTGGGTTAAGTCCCGCAACGAGCGCAACCC	0	0	0	0	0	0	0	0	0	0	0	0	0	0	1	1	2	0.5	36	55	68	92	251	62.75	30
Bacillales_MG_5	G	1	2	Aged_1_65904	100	100	N	Bacillus;Thermobacillus	nt|EU862349.1;silva|EU862349.1.947	-	-	-	-	-	Bacteria	Firmicutes	Bacilli	Bacillales	Bacillales_MG	Bacillales_MG	Bacillales_MG	Aged_1_126099;Compost_2_60673;Aged_1_65904;Aged_2_10491;Compost_1_184670;Litter_1_178106;Aged_4_183849;Aged_4_18183	GGATTAGATACCCTGGTAGTCCACGCCGTAAACGATGAATGCTAGGTGTCAGGGGTGTTAGAGCCCTTGGTGCCGAAGTTAACACATTAAGCATTCCGCCTGGGGAGTACGGTCGCAAGACTGAAACTCAAAGGAATTGACGGGGACCCGCACAAGCAGTGGAGCATGTGGTTTAATTCGAAGCAACGCGAAGAACCTTACCAGGTCTTGACATCCCTCTGACCGGTCTAGAGATAGGCCTTTCCTTCGGGACAGAGGAGACAGGTGGTGCATGGTTGTCGTCAGCTCGTGTCGTGAGATGTTGGGTTAAGTCCCGCAACGAGCGCAACCC	GGATTAGATACCCTGGTAGTCCACGCCGTAAACGATGAATGCTAGGTGTCAGGGGTGTTAGAGCCCTTGGTGCCGAAGTTAACACATTAAGCATTCCGCCTGGGGAGTACGGTCGCAAGACTGAAACTCAAAGGAATTGACGGGGACCCGCACAAGCAGTGGAGCATGTGGTTTAATTCGAAGCAACGCGAAGAACCTTACCAGGTCTTGACATCCCTCTGACCGGTCTAGAGATAGGCCTTTCCTTCGGGACAGAGGAGACAGGTGGTGCATGGTTGTCGTCAGCTCGTGTCGTGAGATGTTGGGTTAAGTCCCGCAACGAGCGCAACCC	230	4	31	19	284	71	274	1269	813	819	3175	793.75	64	208	107	56	435	108.75	86	23	36	72	217	54.25	31
Bacillales_MS_1	S	1	7	Aged_1_126088	100	100	N	Bacillales_aestuarii;Bacillales_niacini;Bacillales_thermocopriae;Bacillus_aestuarii;Bacillus_drentensis;Bacillus_niacini;Bacillus_thermocopriae	nt|AB681945.1;nt|JX914491.1;nt|KP010242.1;nt|MH385357.1;silva|AB681945.1.1478;silva|GQ918255.1.1386;silva|JX914491.1.1361;silva|KP010242.1.1358;silva|KT807465.1.1402	-	-	-	-	-	Bacteria	Firmicutes	Bacilli	Bacillales	Bacillales_MS	Bacillales_MS	Bacillales_MS	Aged_1_106384;Aged_1_117388;Aged_1_126088;Aged_1_107603;Aged_1_125311;Aged_1_92821;Aged_1_41360;Aged_1_110197	GGATTAGATACCCTGGTAGTCCACGCCGTAAACGATGAGTGCTAAGTGTTAGAGGGTTTCCGCCCTTTAGTGCTGCAGCTAACGCATTAAGCACTCCGCCTGGGGAGTACGGCCGCAAGGCTGAAACTCAAAGGAATTGACGGGGGCCCGCACAAGCGGTGGAGCATGTGGTTTAATTCGAAGCAACGCGAAGAACCTTACCAGGTCTTGACATCCTTACGACCTCCCTAGAGATAGGGATTTCCCCTTCGGGGGACGGAAGTGACAGGTGGTGCATGGTTGTCGTCAGCTCGTGTCGTGAGATGTTGGGTTAAGTCCCGCAACGAGCGCAACCC	GGATTAGATACCCTGGTAGTCCACGCCGTAAACGATGAGTGCTAAGTGTTAGAGGGTTTCCGCCCTTTAGTGCTGCAGCTAACGCATTAAGCACTCCGCCTGGGGAGTACGGCCGCAAGGCTGAAACTCAAAGGAATTGACGGGGGCCCGCACAAGCGGTGGAGCATGTGGTTTAATTCGAAGCAACGCGAAGAACCTTACCAGGTCTTGACATCCTTACGACCTCCCTAGAGATAGGGATTTCCCCTTCGGGGGACGGAAGTGACAGGTGGTGCATGGTTGTCGTCAGCTCGTGTCGTGAGATGTTGGGTTAAGTCCCGCAACGAGCGCAACCC	22	1	2	12	37	9.25	35	15	33	18	101	25.25	50	39	43	32	164	41	36	24	30	44	134	33.5	27
Bacillales_MS_10	S	1	4	Aged_1_3977	100	100	N	Bacillales_humi;Bacillales_timonensis;Bacillus_humi;Bacillus_timonensis	nt|KT719928.1;nt|KY021740.1;silva|KT719928.1.1266;silva|KY021740.1.1452	-	-	-	-	-	Bacteria	Firmicutes	Bacilli	Bacillales	Bacillales_MS	Bacillales_MS	Bacillales_MS	Aged_1_142605;Aged_1_146394;Aged_1_3977;Aged_1_143658;Aged_1_127012;Aged_1_7439;Aged_1_92091;Aged_1_146453	GGATTAGATACCCTGGTAGTCCACGCCGTAAACGATGAGTGCTAAGTGTTAGAGGGTTTCCGCCCTTTAGTGCTGAAGTCAACGCATTAAGCACTCCGCCTGGGGAGTACGGTCGCAAGACTGAAACTCAAAGGAATTGACGGGGGCCCGCACAAGCGGTGGAGCATGTGGTTTAATTCGAAGCAACGCGAAGAACCTTACCAGGTCTTGACATCCTCTGACACTCCTAGAGATAGGACGTTCCCTTCGGGGACAGAGTGACAGGTGGTGCATGGTTGTCGTCAGCTCGTGTCGTGAGATGTTGGGTTAAGTCCCGCAACGAGCGCAACCC	GGATTAGATACCCTGGTAGTCCACGCCGTAAACGATGAGTGCTAAGTGTTAGAGGGTTTCCGCCCTTTAGTGCTGAAGTCAACGCATTAAGCACTCCGCCTGGGGAGTACGGTCGCAAGACTGAAACTCAAAGGAATTGACGGGGGCCCGCACAAGCGGTGGAGCATGTGGTTTAATTCGAAGCAACGCGAAGAACCTTACCAGGTCTTGACATCCTCTGACACTCCTAGAGATAGGACGTTCCCTTCGGGGACAGAGTGACAGGTGGTGCATGGTTGTCGTCAGCTCGTGTCGTGAGATGTTGGGTTAAGTCCCGCAACGAGCGCAACCC	2	0	0	0	2	0.5	5	0	3	0	8	2	17	11	20	22	70	17.5	43	37	37	60	177	44.25	12
Bacillales_MS_2	S	1	6	Aged_1_114334	100	100	N	Bacillales_amyloliquefaciens;Bacillales_asahii;Bacillales_methanolicus;Bacillus_amyloliquefaciens;Bacillus_asahii;Bacillus_methanolicus	nt|CP026095.1;nt|FJ009402.1;nt|JQ435670.1;silva|EU867370.1.1368;silva|FJ009402.1.1403;silva|JQ435670.1.1548	-	-	-	-	-	Bacteria	Firmicutes	Bacilli	Bacillales	Bacillales_MS	Bacillales_MS	Bacillales_MS	Aged_1_124782;Aged_1_21864;Aged_1_114334;Aged_1_114544;Aged_1_113683;Aged_1_106040;Aged_1_104291;Aged_1_137643	GGATTAGATACCCTGGTAGTCCACGCCGTAAACGATGAGTGCTAAGTGTTAGAGGGTTTCCGCCCTTTAGTGCTGCAGCTAACGCATTAAGCACTCCGCCTGGGGAGTACGGCCGCAAGGCTGAAACTCAAAGGAATTGACGGGGGCCCGCACAAGCGGTGGAGCATGTGGTTTAATTCGAAGCAACGCGAAGAACCTTACCAGGTCTTGACATCCTCTGCCAACCCTAGAGATAGGGCGTTCCCCTTCGGGGGACAGAGTGACAGGTGGTGCATGGTTGTCGTCAGCTCGTGTCGTGAGATGTTGGGTTAAGTCCCGCAACGAGCGCAACCC	GGATTAGATACCCTGGTAGTCCACGCCGTAAACGATGAGTGCTAAGTGTTAGAGGGTTTCCGCCCTTTAGTGCTGCAGCTAACGCATTAAGCACTCCGCCTGGGGAGTACGGCCGCAAGGCTGAAACTCAAAGGAATTGACGGGGGCCCGCACAAGCGGTGGAGCATGTGGTTTAATTCGAAGCAACGCGAAGAACCTTACCAGGTCTTGACATCCTCTGCCAACCCTAGAGATAGGGCGTTCCCCTTCGGGGGACAGAGTGACAGGTGGTGCATGGTTGTCGTCAGCTCGTGTCGTGAGATGTTGGGTTAAGTCCCGCAACGAGCGCAACCC	0	0	0	0	0	0	0	0	0	0	0	0	1	0	0	1	2	0.5	54	19	37	28	138	34.5	24
Bacillales_MS_3	S	1	2	Aged_2_66437	100	100	N	Bacillales_ginsengihumi;Bacillus_asahii	nt|CP026095.1;silva|KF527201.1.1434	-	-	-	-	-	Bacteria	Firmicutes	Bacilli	Bacillales	Bacillales_MS	Bacillales_MS	Bacillales_MS	Aged_2_66437	GGCTTAGATACCCTGGTAGTCCACGCCGTAAACGATGAGTGCTAAGTGTTAGAGGGTTTCCGCCCTTTAGTGCTGCAGCTAACGCATTAAGCACTCCGCCTGGGGAGTACGGCCGCAAGGCTGAAACTCAAAGGAATTGACGGGGGCCCGCACAAGCGGTGGAGCATGTGGTTTAATTCGAAGCAACGCGAAGAACCTTACCAGGTCTTGACATCCTCTGCTAACCCTAGAGATAGGGCGTTCCCCTTCGGGGGACAGAGTGACAGGTGGTGCATGGTTGTCGTCAGCTCGTGTCGTGAGATGTTGGGTTAAGTCCCGCAACGAGCGCGACCC	GGATTAGATACCCTGGTAGTCCACGCCGTAAACGATGAGTGCTAAGTGTTAGAGGGTTTCCGCCCTTTAGTGCTGCAGCTAACGCATTAAGCACTCCGCCTGGGGAGTACGGCCGCAAGGCTGAAACTCAAAGGAATTGACGGGGGCCCGCACAAGCGGTGGAGCATGTGGTTTAATTCGAAGCAACGCGAAGAACCTTACCAGGTCTTGACATCCTCTGCTAACCCTAGAGATAGGGCGTTCCCCTTCGGGGGACAGAGTGACAGGTGGTGCATGGTTGTCGTCAGCTCGTGTCGTGAGATGTTGGGTTAAGTCCCGCAACGAGCGCAACCC	0	0	0	0	0	0	41	7	7	43	98	24.5	118	43	95	62	318	79.5	47	41	33	42	163	40.75	5
Bacillales_MS_6	S	1	2	Aged_1_101385	100	100	N	Bacillales_firmus;Bacillus_firmus	nt|EU867351.1;silva|EU867351.1.1388;silva|KT719908.1.1389	-	-	-	-	-	Bacteria	Firmicutes	Bacilli	Bacillales	Bacillales_MS	Bacillales_MS	Bacillales_MS	Aged_3_149733;Aged_1_59293;Aged_1_136303;Aged_1_101385;Aged_1_74370;Aged_2_11188;Aged_1_132545;Aged_1_129700	GGATTAGATACCCTGGTAGTCCACGCCGTAAACGATGAGTGCTAAGTGTTAGAGGGTTTCCGCCCTTTAGTGCTGCAGCAAACGCATTAAGCACTCCGCCTGGGGAGTACGGCCGCAAGGCTGAAACTCAAAGGAATTGACGGGGGCCCGCACAAGCGGTGGAGCATGTGGTTTAATTCGAAGCAACGCGAAGAACCTTACCAGGTCTTGACATCCCCTGACAACCCTAGAGATAGGGCGTTCCCCTTCGGGGGACAGGGTGACAGGTGGTGCATGGTTGTCGTCAGCTCGTGTCGTGAGATGTTGGGTTAAGTCCCGCAACGAGCGCGACCC	GGATTAGATACCCTGGTAGTCCACGCCGTAAACGATGAGTGCTAAGTGTTAGAGGGTTTCCGCCCTTTAGTGCTGCAGCAAACGCATTAAGCACTCCGCCTGGGGAGTACGGCCGCAAGGCTGAAACTCAAAGGAATTGACGGGGGCCCGCACAAGCGGTGGAGCATGTGGTTTAATTCGAAGCAACGCGAAGAACCTTACCAGGTCTTGACATCCCCTGACAACCCTAGAGATAGGGCGTTCCCCTTCGGGGGACAGGGTGACAGGTGGTGCATGGTTGTCGTCAGCTCGTGTCGTGAGATGTTGGGTTAAGTCCCGCAACGAGCGCAACCC	0	0	0	0	0	0	0	0	0	0	0	0	0	0	1	0	1	0.25	7	4	10	6	27	6.75	19
Bacillales_MS_7	S	1	4	Aged_1_143787	100	100	N	Bacillales_firmus;Bacillales_oceanisediminis;Bacillus_firmus;Bacillus_oceanisediminis	nt|JX144707.1;nt|LC040955.1;silva|JX144707.1.1422;silva|LC040955.1.1500	-	-	-	-	-	Bacteria	Firmicutes	Bacilli	Bacillales	Bacillales_MS	Bacillales_MS	Bacillales_MS	Aged_2_83069;Aged_1_143787;Aged_1_28771;Litter_1_44747;Aged_1_58207;Aged_3_107854	GGATTAGATACCCTGGTAGTCCACGCCGTAAACGATGAGTGCTAAGTGTTAGAGGGTTTCCGCCCTTTAGTGCTGCAGCAAACGCATTAAGCACTCCGCCTGGGGAGTACGGCCGCAAGGCTGAAACTCAAAGGAATTGACGGGGGCCCGCACAAGCGGTGGAGCATGTGGTTTAATTCGAAGCAACGCGAAGAACCTTACCAGGTCTTGACATCTCCTGCCAACCCTAGAGATAGGGCGTTCCCCTTCGGGGGACAGGATGACAGGTGGTGCATGGTTGTCGTCAGCTCGTGTCGTGAGATGTTGGGTTAAGTCCCGCAACGAGCGCAACCC	GGATTAGATACCCTGGTAGTCCACGCCGTAAACGATGAGTGCTAAGTGTTAGAGGGTTTCCGCCCTTTAGTGCTGCAGCAAACGCATTAAGCACTCCGCCTGGGGAGTACGGCCGCAAGGCTGAAACTCAAAGGAATTGACGGGGGCCCGCACAAGCGGTGGAGCATGTGGTTTAATTCGAAGCAACGCGAAGAACCTTACCAGGTCTTGACATCTCCTGCCAACCCTAGAGATAGGGCGTTCCCCTTCGGGGGACAGGATGACAGGTGGTGCATGGTTGTCGTCAGCTCGTGTCGTGAGATGTTGGGTTAAGTCCCGCAACGAGCGCAACCC	0	0	0	0	0	0	0	0	0	0	0	0	3	0	2	3	8	2	27	17	23	22	89	22.25	7
Bacillales_MS_8	S	1	2	Aged_2_153098	100	100	N	Bacillales_horti;Bacillus_horti	nt|KF849331.1;silva|KF849331.1.922	-	-	-	-	-	Bacteria	Firmicutes	Bacilli	Bacillales	Bacillales_MS	Bacillales_MS	Bacillales_MS	Aged_2_137391;Aged_1_57450;Aged_2_153098;Aged_1_31488;Aged_2_49200;Aged_4_115005;Aged_1_129836;Aged_2_9035	GGATTAGATACCCTGGTAGTCCACGCCGTAAACGATGAGTGCTAGGTGTTAGGGGTTTCGATACCCTTAGTGCCGACGTTAACACAATAAGCACTCCGCCTGGGGAGTACGGCCGCAAGGCTGAAACTCAAAGGAATTGACGGGGACCCGCACAAGCAGTGGAGCATGTGGTTTAATTCGAAGCAACGCGAAGAACCTTACCAGGACTTGACATCCCTCTGAATCCTCTAGAGATAGAGGCGGCCTTCGGGACAGAGGTGACAGGTGGTGCATGGTTGTCGTCAGCTCGTGTCGTGAGATGTTGGGTTAAGTCCCGCAACGAGCGCAACCC	GGATTAGATACCCTGGTAGTCCACGCCGTAAACGATGAGTGCTAGGTGTTAGGGGTTTCGATACCCTTAGTGCCGACGTTAACACAATAAGCACTCCGCCTGGGGAGTACGGCCGCAAGGCTGAAACTCAAAGGAATTGACGGGGACCCGCACAAGCAGTGGAGCATGTGGTTTAATTCGAAGCAACGCGAAGAACCTTACCAGGACTTGACATCCCTCTGAATCCTCTAGAGATAGAGGCGGCCTTCGGGACAGAGGTGACAGGTGGTGCATGGTTGTCGTCAGCTCGTGTCGTGAGATGTTGGGTTAAGTCCCGCAACGAGCGCAACCC	0	0	0	0	0	0	7	2	2	7	18	4.5	30	14	44	15	103	25.75	82	55	23	43	203	50.75	44
Bacillales_MS_9	S	1	2	Compost_1_171913	99.396	100	N	Bacillales_acidiceler;Bacillus_acidiceler	nt|KT719795.1;silva|KT719795.1.1402	-	-	-	-	-	Bacteria	Firmicutes	Bacilli	Bacillales	Bacillales_MS	Bacillales_MS	Bacillales_MS	Compost_1_171913	GGCTTAGATACCCTGGTAGTCCACGCCGTAAACGATGAGTGCTAAGTGTTAGAGGGTTTCCGCCCTTTAGTGCTGAAGTTAACGCATTAAGCACTCCGCCTGGGGAGTACGGTCGCAAGACTGAAACTCAAAGGAATTGACGGGGGCCCGCACAAGTGGTGGAGCATGTGGTTTAATTCGAAGCAACGCGAAGAACCTTACCAGGTCTTGACATCCTCTGACAACCCTAGAGATAGGGCTTTCCCTTCGGGGACAGAGTGACAGGTGGTGCATGGTTGTCGTCAGCTCGTGTCGTGAGATGTTGGGTTAAGTCCCGCAACGAGCGCAACCC	GGATTAGATACCCTGGTAGTCCACGCCGTAAACGATGAGTGCTAAGTGTTAGAGGGTTTCCGCCCTTTAGTGCTGAAGTTAACGCATTAAGCACTCCGCCTGGGGAGTACGGCCGCAAGGCTGAAACTCAAAGGAATTGACGGGGGCCCGCACAAGTGGTGGAGCATGTGGTTTAATTCGAAGCAACGCGAAGAACCTTACCAGGTCTTGACATCCTCTGACAACCCTAGAGATAGGGCTTTCCCTTCGGGGACAGAGTGACAGGTGGTGCATGGTTGTCGTCAGCTCGTGTCGTGAGATGTTGGGTTAAGTCCCGCAACGAGCGCAACCC	0	2	1	0	3	0.75	377	43	287	1122	1829	457.25	422	624	600	232	1878	469.5	117	105	120	190	532	133	111
Bacillus_1	G	1	0	Aged_2_65782	99.698	100	N	Bacillus	nt|AB190519.1;rdp|S000467601	-	-	-	-	-	Bacteria	Firmicutes	Bacilli	Bacillales	Bacillaceae	Bacillus	Bacillus	Aged_2_65782;Aged_3_69322;Aged_3_126655;Aged_3_100181	GGATTAGATACCCTGGTAGTCCACGCCGTAAACGATGAGTGCTAGGTGTTAGGGGTTTCGATACCCTTAGTGCCGACGTTAACACAATAAGCACTCCGCCTGGGGAGTACGGCCGCAAGGCTGAAACTCAAAGGAATTGACGGGGACCCGCACAAGCAGTGGAGCATGTGGTTTAATTCGAAGCAACGCGAAGAACCTTACCAGGACTTGACATCCTTTGACAACCCTAGAGATAGGGCTTCCCCTTCGGGGGCAAAGTGACAGGTGGTGCATGGTTGTCGTCAGCTCGTGTCGTGAGATGTTGGGTTAAGTCCCGCAACGAGCGCAACCC	GGATTAGATACCCTGGTAGTCCACGCCGTAAACGATGAGTGCTAGGTGTTAGGGGTTTCGATACCCTTAGTGCCGACGTTAACACAATAAGCACTCCGCCTGGGGAGTACGGCCGCAAGGCTGAAACTCAAAGGAATTGACGGGGACCCGCACAAGCAGTGGAGCATGTGGTTTAATTCGAAGCAACGCGAAGAACCTTACCAGGACTTGACATCCTTTGACACCCCTAGAGATAGGGCTTCCCCTTCGGGGGCAAAGTGACAGGTGGTGCATGGTTGTCGTCAGCTCGTGTCGTGAGATGTTGGGTTAAGTCCCGCAACGAGCGCAACCC	0	0	0	0	0	0	1	0	1	0	2	0.5	0	0	0	1	1	0.25	7	1	3	2	13	3.25	1
Bacillus_2	G	1	0	Aged_4_111260	99.099	100	N	Bacillus	nt|AJ315061.1;rdp|S000446608;silva|KP307836.1.1515	-	-	-	-	-	Bacteria	Firmicutes	Bacilli	Bacillales	Bacillaceae	Bacillus	Bacillus	Aged_2_5071;Aged_4_111260	GGATTAGATACCCTGGTAGTCCACGCCGTAAACGATGAGTGCTAAGTGTTAGAGGGTTTCCACCCTTTAGTGCTGCAGCAAACGCATTAAGCACTCCGCCTGGGGAGTACGGTCGCAAGACTGAAACTCAAAGGAATTGACGGGGGCCCGCACAAGCGGTGGAGCATGTGGTTTAATTCGAAGCAACGCGAAGAACCTTACCAGGTCTTGACATCCTTATGCCTGCTCTAGAGATAGGGCTTTCCCTTCGGGGACATAAGTGACAGGTGGTGCATGGTTGTCGTCAGCTCGTGTCGTGAGATGTTGGGTTAAGTCCCGCAACGAGCGCGACCC	GGATTAGATACCCTGGTAGTCCACGCCGTAAACGATGAGTGCTAAGTGTTAGAGGGTTTCCGCCCTTTAGTGCTGCAGCAAACGCATTAAGCACTCCGCCTGGGGAGTACGGTCGCAAGACTGAAACTCAAAGGAATTGACGGGGGCCCGCACAAGCGGTGGAGCATGTGGTTTAATTCGAAGCAACGCGAAGAACCTTACCAGGTCTTGACATCCTTATGCCTTCTCTAGAGATAGAGCTTTCCCTTCGGGGACATAAGTGACAGGTGGTGCATGGTTGTCGTCAGCTCGTGTCGTGAGATGTTGGGTTAAGTCCCGCAACGAGCGCAACCC	0	0	0	0	0	0	2	0	0	0	2	0.5	5	4	0	5	14	3.5	11	8	53	1	73	18.25	1
Bacillus_3	G	1	0	Aged_1_104523	99.398	100	N	Bacillus	nt|GU271876.1;silva|GU271876.1.702	-	-	-	-	-	Bacteria	Firmicutes	Bacilli	Bacillales	Bacillaceae	Bacillus	Bacillus	Aged_1_161337;Aged_1_101569;Aged_1_104523;Aged_1_115608;Compost_1_1054;Aged_1_61059;Aged_1_103871;Aged_1_137444	GGATTAGATACCCTGGTAGTCCACGCTGTAAACGATGGGTGCTCGGTGTCGCGGGTATCGACCCCTGCGGTGCCTTAGCTAACGCGTTAAGCACCCCGCCTGGGGAGTACGGTCGCAAGGCTGAAACTCAAAGGAATTGACGGGGGCCCGCACAAGCGGTGGAGCATGTGGTTTAATTCGATGCAACGCGAAGAACCTTACCTGGGCTTGAACTGTGGCGGACGGTCCTGGAAACAGGATTTCCCCTTCGGGGGCCGCCATAGAGGTGCTGCATGGCTGTCGTCAGCTCGTGTCGTGAGATGTTGGGTTAAGTCCCGCAACGAGCGCAACCC	GGATTAGATACCCTGGTAGTCCACGCTGTAAACGATGGGTGCTCGGTGTCGCGGGTATCGACCCCTGCGGTGCCTTAGCTAACGCGTTAAGCACCCCGCCTGGGGAGTACGGTCGCAAGGCTGAAACTCAAAGGAATTGACGGGGGCCCGCACAAGCGGTGGAGCATGTGGTTTAATTTGATGCAACGCGAAGAACCTTACCTGGGCTTGAACTGTGGTGGACGGTCCTGGAAACAGGATTTCCCCTTCGGGGGCCGCCATAGAGGTGCTGCATGGCTGTCGTCAGCTCGTGTCGTGAGATGTTGGGTTAAGTCCCGCAACGAGCGCAACCC	0	0	0	0	0	0	3	0	0	1	4	1	1	0	0	5	6	1.5	39	17	10	15	81	20.25	29
Bacillus_4	G	1	0	Aged_3_96640	99.698	100	N	Bacillus	nt|JX848634.1;rdp|S000561217;silva|AB034705.1.1475	-	-	-	-	-	Bacteria	Firmicutes	Bacilli	Bacillales	Bacillaceae	Bacillus	Bacillus	Aged_3_96640;Aged_2_134187	GGATTAGATACCCTGGTAGTCCACGCCGTAAACGATGAGTGCTAAGTGTTGGAGGGTTTCCGCCCTTCAGTGCTGCAGCAAACGCATTAAGCACTCCGCCTGGGGAGTACGGTCGCAAGACTGAAACTCAAAGGAATTGACGGGGACCCGCACAAGCGGTGGAGCATGTGGTTTAATTCGAAGCAACGCGAAGAACCTTACCAGGTCTTGACATCTCCTGACCTCCCTAGAGATAGGGCCTTCCCTTCGGGGACAGGATGACAGGTGGTGCATGGTTGTCGTCAGCTCGTGTCGTGAGATGTTGGGTTAAGTCCCGCAACGAGCGCAACCC	GGATTAGATACCCTGGTAGTCCACGCCGTAAACGATGAGTGCTAAGTGTTGGAGGGTTTCCGCCCTTCAGTGCTGCAGCAAACGCATTAAGCACTCCGCCTGGGGAGTACGGTCGCAAGACTGAAACTCAAAGGAATTGACGGGGACCCGCACAAGCGGTGGAGCATGTGGTTTAATTCGAAGCAACGCGAAGAACCTTACCAGGTCTTGACATCTCCTGACCACCCTAGAGATAGGGCCTTCCCTTCGGGGACAGGATGACAGGTGGTGCATGGTTGTCGTCAGCTCGTGTCGTGAGATGTTGGGTTAAGTCCCGCAACGAGCGCAACCC	0	0	0	0	0	0	5	0	2	2	9	2.25	3	5	11	13	32	8	23	12	26	38	99	24.75	0
Bacillus_5	G	1	0	Aged_1_80723	100	100	N	Bacillus	rdp|S000972909	-	-	-	-	-	Bacteria	Firmicutes	Bacilli	Bacillales	Bacillaceae	Bacillus	Bacillus	Aged_1_122895;Aged_1_80723;Aged_1_48218;Aged_1_146383	GGATTAGATACCCTGGTAGTCCACGCCGTAAACGATGAGTGCTAAGTGTTGGAGGGTTTCCGCCCTTCAGTGCTGCAGCTAACGCATTAAGCACTCCGCCTGGGGAGTACGGTCGCAAGACTGAAACTCAAAGGAATTGACGGGGGCCCGCACAAGCGGTGGAGCATGTGGTTTAATTCGAAGCAACGCGAAGAACCTTACCAGGTCTTGACATCTCCTGACCTCCCTAGAGATAGGGCCTTCCCCTTCGGGGGACAGGATGACAGGTGGTGCATGGTTGTCGTCAGCTCGTGTCGTGAGATGTTGGGTTAAGTCCCGCAACGAGCGCGACCC	GGATTAGATACCCTGGTAGTCCACGCCGTAAACGATGAGTGCTAAGTGTTGGAGGGTTTCCGCCCTTCAGTGCTGCAGCTAACGCATTAAGCACTCCGCCTGGGGAGTACGGTCGCAAGACTGAAACTCAAAGGAATTGACGGGGGCCCGCACAAGCGGTGGAGCATGTGGTTTAATTCGAAGCAACGCGAAGAACCTTACCAGGTCTTGACATCTCCTGACCTCCCTAGAGATAGGGCCTTCCCCTTCGGGGGACAGGATGACAGGTGGTGCATGGTTGTCGTCAGCTCGTGTCGTGAGATGTTGGGTTAAGTCCCGCAACGAGCGCAACCC	38	2	2	5	47	11.75	29	27	19	6	81	20.25	26	14	34	12	86	21.5	24	10	12	47	93	23.25	15
Bacillus_6	G	2	0	Aged_1_105245	99.7	100	N	Bacillus	rdp|S001200475	-	-	-	-	-	Bacteria	Firmicutes	Bacilli	Bacillales	Bacillaceae	Bacillus	Bacillus	Aged_1_52938;Aged_1_105245	GGCTTAGATACCCTGGTAGTCCACGCCGTAAACGATGAGTGCTAGGTGTTAGAGGGTTTCCGCCCTTTAGTGCTGCAGCTAACGCATTAAGCACTCCGCCTGGGGAGTACGGCCGCAAGGCTGAAACTCAAAGGAATTGACGGGGGCCCGCACAAGCGGTGGAGCATGTGGTTTAATTCGAAGCAACGCGAAGAACCTTACCAGGTTTTGACATCCCGCTGACCGGCCTAGAGATAGGTCTTTCCCTTCGGGGACAGCGGTGACAGGTGGTGCATGGTTGTCGTCAGCTCGTGTCGTGAGATGTTGGGTTAAGTCCCGCAACGAGCGCAACCC	GGATTAGATACCCTGGTAGTCCACGCCGTAAACGATGAGTGCTAGGTGTTAGAGGGTTTCCGCCCTTTAGTGCTGCAGCTAACGCATTAAGCACTCCGCCTGGGGAGTACGGCCGCAAGGCTGAAACTCAAAGGAATTGACGGGGGCCCGCACAAGCGGTGGAGCATGTGGTTTAATTCGAAGCAACGCGAAGAACCTTACCAGGTCTTGACATCCCGCTGACCGGCCTAGAGATAGGTCTTTCCCTTCGGGGACAGCGGTGACAGGTGGTGCATGGTTGTCGTCAGCTCGTGTCGTGAGATGTTGGGTTAAGTCCCGCAACGAGCGCAACCC	0	0	0	0	0	0	5	23	0	5	33	8.25	0	3	18	1	22	5.5	3	30	17	15	65	16.25	0
Bacillus_7	G	1	0	Aged_1_152169	100	100	N	Bacillus	rdp|S002175418;silva|HM036001.1.1511	-	-	-	-	-	Bacteria	Firmicutes	Bacilli	Bacillales	Bacillaceae	Bacillus	Bacillus	Aged_1_119956;Compost_2_45883;Aged_1_152169;Aged_1_149978;Compost_3_151920;Aged_4_117673;Aged_1_106623;Aged_2_13736	GGATTAGATACCCTGGTAGTCCACGCCGTAAACGATGAGTGCTAAGTGTTGGAGGGTTTCCGCCCTTCAGTGCTGCAGCAAACGCATTAAGCACTCCGCCTGGGGAGTACGGTCGCAAGACTGAAACTCAAAGGAATTGACGGGGACCCGCACAAGCGGTGGAGCATGTGGTTTAATTCGAAGCAACGCGAAGAACCTTACCAGGTCTTGACATCTCCTGACCACCCTAGAGATAGGACCTTCCCTTCGGGGACAGGATGACAGGTGGTGCATGGTTGTCGTCAGCTCGTGTCGTGAGATGTTGGGTTAAGTCCCGCAACGAGCGCAACCC	GGATTAGATACCCTGGTAGTCCACGCCGTAAACGATGAGTGCTAAGTGTTGGAGGGTTTCCGCCCTTCAGTGCTGCAGCAAACGCATTAAGCACTCCGCCTGGGGAGTACGGTCGCAAGACTGAAACTCAAAGGAATTGACGGGGACCCGCACAAGCGGTGGAGCATGTGGTTTAATTCGAAGCAACGCGAAGAACCTTACCAGGTCTTGACATCTCCTGACCACCCTAGAGATAGGACCTTCCCTTCGGGGACAGGATGACAGGTGGTGCATGGTTGTCGTCAGCTCGTGTCGTGAGATGTTGGGTTAAGTCCCGCAACGAGCGCAACCC	0	0	0	0	0	0	2	0	2	0	4	1	0	1	0	2	3	0.75	8	14	17	25	64	16	37
Bacillus_8	G	1	0	Compost_2_24605	100	100	N	Bacillus	rdp|S003060740	-	-	-	-	-	Bacteria	Firmicutes	Bacilli	Bacillales	Bacillaceae	Bacillus	Bacillus	Compost_2_24605;Litter_1_175543;Compost_2_139144	GGATTAGATACCCTGGTAGTCCACGCCGTAAACGATGAGTGCTAAGTGTTAGGGGGTTTCCGCCCCTTAGTGCTGCAGCTAACGCATTAAGCACTCCGCCTGGGGAGTACGCTCGCAAGAGTGAAACTCAAAGGAATTGACGGGGGCCCGCACAAGCGGTGGAGCATGTGGTTTAATTCGAAGCAACGCGAAGAACCTTACCAGGTCTTGACATCCTCTGACCACTCTAGAGATAGAGCCTTCCCCTTCGGGGGACAGAGTGACAGGTGGTGCATGGTTGTCGTCAGCTCGTGTCGTGAGATGTTGGGTTAAGTCCCGCAACGAGCGCAACCC	GGATTAGATACCCTGGTAGTCCACGCCGTAAACGATGAGTGCTAAGTGTTAGGGGGTTTCCGCCCCTTAGTGCTGCAGCTAACGCATTAAGCACTCCGCCTGGGGAGTACGCTCGCAAGAGTGAAACTCAAAGGAATTGACGGGGGCCCGCACAAGCGGTGGAGCATGTGGTTTAATTCGAAGCAACGCGAAGAACCTTACCAGGTCTTGACATCCTCTGACCACTCTAGAGATAGAGCCTTCCCCTTCGGGGGACAGAGTGACAGGTGGTGCATGGTTGTCGTCAGCTCGTGTCGTGAGATGTTGGGTTAAGTCCCGCAACGAGCGCAACCC	0	0	0	0	0	0	0	0	0	0	0	0	0	0	0	2	2	0.5	34	26	35	33	128	32	10
Bacillus_9	G	1	0	Aged_1_123635	100	100	N	Bacillus	rdp|S004043186	-	-	-	-	-	Bacteria	Firmicutes	Bacilli	Bacillales	Bacillaceae	Bacillus	Bacillus	Compost_1_165871;Aged_1_123635;Aged_1_115032;Aged_2_90969;Aged_2_116423	GGATTAGATACCCTGGTAGTCCACGCCGTAAACGATGAGTGCTAAGTGTTGGAGGGTTTCCGCCCTTCAGTGCTGCAGCTAACGCATTAAGCACTCCGCCTGGGGAGTACGGTCGCAAGACTGAAACTCAAAGGAATTGACGGGGGCCCGCACAAGCGGTGGAGCATGTGGTTTAATTCGAAGCAACGCGAAGAACCTTACCAGGTCTTGACATCCTCTGACAATCCTAGAGATAGGACGTTCCCTTCGGGGACAGAGTGACAGGTGGTGCATGGTTGTCGTCAGCTCGTGTCGTGAGATGTTGGGTTAAGTCCCGCAACGAGCGCAACCC	GGATTAGATACCCTGGTAGTCCACGCCGTAAACGATGAGTGCTAAGTGTTGGAGGGTTTCCGCCCTTCAGTGCTGCAGCTAACGCATTAAGCACTCCGCCTGGGGAGTACGGTCGCAAGACTGAAACTCAAAGGAATTGACGGGGGCCCGCACAAGCGGTGGAGCATGTGGTTTAATTCGAAGCAACGCGAAGAACCTTACCAGGTCTTGACATCCTCTGACAATCCTAGAGATAGGACGTTCCCTTCGGGGACAGAGTGACAGGTGGTGCATGGTTGTCGTCAGCTCGTGTCGTGAGATGTTGGGTTAAGTCCCGCAACGAGCGCAACCC	0	0	0	0	0	0	19	38	15	32	104	26	46	72	42	29	189	47.25	48	29	66	56	199	49.75	34
Bacillus_benzoevorans_1	S	2	0	Aged_1_106399	100	100	N	Bacillus_benzoevorans	nt|Y14693.1;silva|Y14693.1.1525	-	-	-	-	-	Bacteria	Firmicutes	Bacilli	Bacillales	Bacillaceae	Bacillus	Bacillus_benzoevorans	Aged_2_101892;Aged_1_38294;Aged_1_106399;Aged_1_153457;Aged_1_69288;Aged_1_133260;Aged_1_12011;Aged_1_3034	GGATTAGATACCCTGGTAGTCCACGCCGTAAACGATGAGTGCTAAGTGTTAGAGGGTTTCCGCCCTTTAGTGCTGCAGCAAACGCATTAAGCACTCCGCCTGGGGAGTACGGCCGCAAGGCTGAAACTCAAAGGAATTGACGGGGACCCGCACAAGCGGTGGAGCATGTGGTTTAATTCGAAGCAACGCGAAGAACCTTACCAGGTCTTGACATCCTCTGACCATCCTAGAGATAGGACCTTCCCCTTCGGGGGACAGAGTGACAGGTGGTGCATGGTTGTCGTCAGCTCGTGTCGTGAGATGTTGGGTTAAGTCCCGCAACGAGCGCAACCC	GGATTAGATACCCTGGTAGTCCACGCCGTAAACGATGAGTGCTAAGTGTTAGAGGGTTTCCGCCCTTTAGTGCTGCAGCAAACGCATTAAGCACTCCGCCTGGGGAGTACGGCCGCAAGGCTGAAACTCAAAGGAATTGACGGGGACCCGCACAAGCGGTGGAGCATGTGGTTTAATTCGAAGCAACGCGAAGAACCTTACCAGGTCTTGACATCCTCTGACCATCCTAGAGATAGGACCTTCCCCTTCGGGGGACAGAGTGACAGGTGGTGCATGGTTGTCGTCAGCTCGTGTCGTGAGATGTTGGGTTAAGTCCCGCAACGAGCGCAACCC	11	0	1	0	12	3	20	3	20	9	52	13	5	32	3	4	44	11	7	4	6	4	21	5.25	8
Bacillus_borbori_1	S	6	0	Aged_1_104526	100	100	N	Bacillus_borbori	16SMicrobial|NR_132725.1	Bacillus_borbori	0	Bacillus_borbori	nt|NR_132725.1;silva|JX274440.1.1453	100.0/100.0;99.7/100.0	Bacteria	Firmicutes	Bacilli	Bacillales	Bacillaceae	Bacillus	Bacillus_borbori	Aged_1_125565;Aged_1_131003;Aged_1_104526;Aged_1_104696;Aged_3_38866;Compost_1_59868;Aged_1_125197;Aged_1_103280;Aged_1_11757;Aged_1_104223	GGATTAGATACCCTGGTAGTCCACGCCGTAAACGATGAGTGCTAAGTGTTAGAGGGTTTCCGCCCTTTAGTGCTGCAGCTAACGCATTAAGCACTCCGCCTGGGGAGTACGGCCGCAAGGCTGAAACTCAAAGGAATTGACGGGGGCCCGCACAAGCGGTGGAGCATGTGGTTTAATTCGAAGCAACGCGAAGAACCTTACCAGGTCTTGACATCCTCTGCTACTTCTAGAGATAGAAGGTTCCCCTTCGGGGGACGGAGTGACAGGTGGTGCATGGTTGTCGTCAGCTCGTGTCGTGAGATGTTGGGTTAAGTCCCGCAACGAGCGCAACCC	GGATTAGATACCCTGGTAGTCCACGCCGTAAACGATGAGTGCTAAGTGTTAGAGGGTTTCCGCCCTTTAGTGCTGCAGCTAACGCATTAAGCACTCCGCCTGGGGAGTACGGCCGCAAGGCTGAAACTCAAAGGAATTGACGGGGGCCCGCACAAGCGGTGGAGCATGTGGTTTAATTCGAAGCAACGCGAAGAACCTTACCAGGTCTTGACATCCTCTGCTACTTCTAGAGATAGAAGGTTCCCCTTCGGGGGACGGAGTGACAGGTGGTGCATGGTTGTCGTCAGCTCGTGTCGTGAGATGTTGGGTTAAGTCCCGCAACGAGCGCAACCC	0	0	0	0	0	0	1	0	0	0	1	0.25	3	1	1	0	5	1.25	13	4	16	8	41	10.25	15
Bacillus_coagulans_1	S	1	0	Aged_3_170562	100	100	N	Bacillus_coagulans	16SMicrobial|NR_041523.1	Bacillales_MS	2	Bacillales_coagulans;Bacillus_coagulans	nt|AB116136.1;silva|AB116136.1.1500;silva|JQ389626.1.856	100.0/100.0	Bacteria	Firmicutes	Bacilli	Bacillales	Bacillaceae	Bacillus	Bacillus_coagulans	Aged_3_170562;Aged_2_100616	GGATTAGATACCCTGGTAGTCCACGCCGTAAACGATGAGTGCTAAGTGTTAGAGGGTTTCCGCCCTTTAGTGCTGCAGCTAACGCATTAAGCACTCCGCCTGGGGAGTACGGCCGCAAGGCTGAAACTCAAAGGAATTGACGGGGGCCCGCACAAGCGGTGGAGCATGTGGTTTAATTCGAAGCAACGCGAAGAACCTTACCAGGTCTTGACATCCTCTGACCTCCCTGGAGACAGGGCCTTCCCCTTCGGGGGACAGAGTGACAGGTGGTGCATGGTTGTCGTCAGCTCGTGTCGTGAGATGTTGGGTTAAGTCCCGCAACGAGCGCAACCC	GGATTAGATACCCTGGTAGTCCACGCCGTAAACGATGAGTGCTAAGTGTTAGAGGGTTTCCGCCCTTTAGTGCTGCAGCTAACGCATTAAGCACTCCGCCTGGGGAGTACGGCCGCAAGGCTGAAACTCAAAGGAATTGACGGGGGCCCGCACAAGCGGTGGAGCATGTGGTTTAATTCGAAGCAACGCGAAGAACCTTACCAGGTCTTGACATCCTCTGACCTCCCTGGAGACAGGGCCTTCCCCTTCGGGGGACAGAGTGACAGGTGGTGCATGGTTGTCGTCAGCTCGTGTCGTGAGATGTTGGGTTAAGTCCCGCAACGAGCGCAACCC	0	0	0	0	0	0	0	0	0	0	0	0	0	0	0	0	0	0	7	9	19	14	49	12.25	27
Bacillus_ginsengihumi_1	S	1	0	Aged_1_45653	100	100	N	Bacillus_ginsengihumi	16SMicrobial|NR_041378.1	Bacillales_MS	2	Bacillales_ginsengihumi;Bacillus_ginsengihumi	nt|FJ357590.1;silva|AB245378.1.1499;silva|KX084801.1.781	100.0/100.0	Bacteria	Firmicutes	Bacilli	Bacillales	Bacillaceae	Bacillus	Bacillus_ginsengihumi	Aged_1_45653;Compost_2_52776;Aged_2_119195;Aged_1_56585	GGATTAGATACCCTGGTAGTCCACGCCGTAAACGATGAGTGCTAAGTGTTAGAGGGTTTCCGCCCTTTAGTGCTGCAGCTAACGCATTAAGCACTCCGCCTGGGGAGTACGACCGCAAGGTTGAAACTCAAAGGAATTGACGGGGGCCCGCACAAGCGGTGGAGCATGTGGTTTAATTCGAAGCAACGCGAAGAACCTTACCAGGTCTTGACATCCTCTGACCTCCCTAGAGATAGGGCCTTCCCCTTCGGGGGACAGAGTGACAGGTGGTGCATGGTTGTCGTCAGCTCGTGTCGTGAGATGTTGGGTTAAGTCCCGCAACGAGCGCAACCC	GGATTAGATACCCTGGTAGTCCACGCCGTAAACGATGAGTGCTAAGTGTTAGAGGGTTTCCGCCCTTTAGTGCTGCAGCTAACGCATTAAGCACTCCGCCTGGGGAGTACGACCGCAAGGTTGAAACTCAAAGGAATTGACGGGGGCCCGCACAAGCGGTGGAGCATGTGGTTTAATTCGAAGCAACGCGAAGAACCTTACCAGGTCTTGACATCCTCTGACCTCCCTAGAGATAGGGCCTTCCCCTTCGGGGGACAGAGTGACAGGTGGTGCATGGTTGTCGTCAGCTCGTGTCGTGAGATGTTGGGTTAAGTCCCGCAACGAGCGCAACCC	0	0	0	0	0	0	0	0	0	0	0	0	0	0	4	0	4	1	26	16	23	16	81	20.25	10
Bacillus_humi_1	S	1	0	Aged_1_20350	99.399	100	N	Bacillus_humi	16SMicrobial|NR_025626.1	-	-	-	-	-	Bacteria	Firmicutes	Bacilli	Bacillales	Bacillaceae	Bacillus	Bacillus_humi	Aged_1_20350	GGCTTAGATACCCTGGTAGTCCACGCCGTAAACGATGAGTGCTAAGTGTTAGAGGGTTTCCGCCCTTTAGTGCTGCAGCAAACGCATTAAGCACTCCGCCTGGGGAGTACGGTCGCAAGACTGAAACTCAAAGGAATTGACGGGGGCCCGCACAAGCGGTGGAGCATGTGGTTTAATTCGAAGCAACGCGAAGAACCTTACCAGGTCTTGACATCCTTATGCCATCTCTAGAGATAGAGCTTTCCCTTCGGGGACATAAGTGACAGGTGGTGCATGGTTGTCGTCAGCTCGTGTCGTGAGATGTTGGGTTAAGTCCCGCAACGAGCGCAACCC	GGATTAGATACCCTGGTAGTCCACGCCGTAAACGATGAGTGCTAAGTGTTAGAGGGTTTCCGCCCTTTAGTGCTGCAGCAAACGCATTAAGCACTCCGCCTGGGGAGTACGGTCGCAAGACTGAAACTCAAAGGAATTGACGGGGGCCCGCACAAGCGGTGGAGCATGTGGTTTAATTCGAAGCAACGCGAAGAACCTTACCAGGTCTTGACATCCTTATGCCATCCCTAGAGATAGGGCTTTCCCTTCGGGGACATAAGTGACAGGTGGTGCATGGTTGTCGTCAGCTCGTGTCGTGAGATGTTGGGTTAAGTCCCGCAACGAGCGCAACCC	0	0	0	0	0	0	23	12	22	29	86	21.5	84	60	90	44	278	69.5	35	19	13	30	97	24.25	24
Bacillus_infernus_1	S	1	0	Aged_1_135513	100	100	N	Bacillus_infernus	16SMicrobial|NR_027227.1	Bacillales_MS	2	Bacillales_infernus;Bacillus_infernus	nt|KT351638.1;silva|KT351638.1.1083	100.0/100.0	Bacteria	Firmicutes	Bacilli	Bacillales	Bacillaceae	Bacillus	Bacillus_infernus	Aged_1_135513;Aged_1_2201;Aged_1_154257;Aged_1_81395	GGATTAGATACCCTGGTAGTCCACGCCGTAAACGATGAGTGCTAAGTGTTAGAGGGTTTCCGCCCTTTAGTGCTGCAGCTAACGCATTAAGCACTCCGCCTGGGGAGTACGGCCGCAAGGCTGAAACTCAAAGGAATTGACGGGGGCCCGCACAAGCGGTGGAGCATGTGGTTTAATTCGAAGCAACGCGAAGAACCTTACCAGGTCTTGACATCCTCTGACCATCCTGGAGACAGGACCTTCCCCTTCGGGGGACAGAGTGACAGGTGGTGCATGGTTGTCGTCAGCTCGTGTCGTGAGATGTTGGGTTAAGTCCCGCAACGAGCGCAACCC	GGATTAGATACCCTGGTAGTCCACGCCGTAAACGATGAGTGCTAAGTGTTAGAGGGTTTCCGCCCTTTAGTGCTGCAGCTAACGCATTAAGCACTCCGCCTGGGGAGTACGGCCGCAAGGCTGAAACTCAAAGGAATTGACGGGGGCCCGCACAAGCGGTGGAGCATGTGGTTTAATTCGAAGCAACGCGAAGAACCTTACCAGGTCTTGACATCCTCTGACCATCCTGGAGACAGGACCTTCCCCTTCGGGGGACAGAGTGACAGGTGGTGCATGGTTGTCGTCAGCTCGTGTCGTGAGATGTTGGGTTAAGTCCCGCAACGAGCGCAACCC	1	2	0	0	3	0.75	22	45	54	63	184	46	97	128	127	54	406	101.5	17	23	25	99	164	41	43
Bacillus_kokeshiiformis_1	S	3	0	Aged_2_77774	99.699	100	N	Bacillus_kokeshiiformis	16SMicrobial|NR_133975.1	Bacillus_kokeshiiformis	0	-;Bacillus_kokeshiiformis	-;nt|NR_133975.1;silva|JX848633.1.1454	-;99.699/100.0	Bacteria	Firmicutes	Bacilli	Bacillales	Bacillaceae	Bacillus	Bacillus_kokeshiiformis	Aged_2_100752;Aged_1_38846;Aged_1_137940;Aged_2_77774;Compost_4_51448;Aged_1_66096;Aged_1_153197	GGATTAGATACCCTGGTAGTCCACGCCGTAAACGATGAGTGCTAAGTGTTGGGGGGTTTCCGCCCTTCAGTGCTGCAGCTAACGCATTAAGCACTCCGCCTGGGGAGTACGGTCGCAAGACTGAAACTCAAAGGAATTGACGGGGACCCGCACAAGCGGTGGAGCATGTGGTTTAATTCGAAGCAACGCGAAGAACCTTACCAGGTCTTGACATCTCCTGACCACCCTAGAGATAGGGCTTTCCCTTCGGGGACAGGATGACAGGTGGTGCATGGTTGTCGTCAGCTCGTGTCGTGAGATGTTGGGTTAAGTCCCGCAACGAGCGCGACCC	GGATTAGATACCCTGGTAGTCCACGCCGTAAACGATGAGTGCTAAGTGTTGGGAGGGTTTCCGCCCTTCAGTGCTGCAGCTAACGCATTAAGCACTCCGCCTGGGGAGTACGGTCGCAAGACTGAAACTCAAAGGAATTGACGGGGACCCGCACAAGCGGTGGAGCATGTGGTTTAATTCGAAGCAACGCGAAGAACCTTACCAGGTCTTGACATCTCCTGACCACCCTAGAGATAGGGCTTTCCCTTCGGGGACAGGATGACAGGTGGTGCATGGTTGTCGTCAGCTCGTGTCGTGAGATGTTGGGTTAAGTCCCGCAACGAGCGCAACCC	0	0	0	0	0	0	9	1	8	2	20	5	44	22	27	47	140	35	45	26	18	52	141	35.25	11
Bacillus_kokeshiiformis_2	S	2	0	Aged_1_39526	100	100	N	Bacillus_kokeshiiformis	nt|MG651137.1	-	-	-	-	-	Bacteria	Firmicutes	Bacilli	Bacillales	Bacillaceae	Bacillus	Bacillus_kokeshiiformis	Aged_1_122257;Aged_1_42897;Aged_1_39526;Aged_1_150892;Aged_1_36434;Aged_3_121738;Aged_1_148180;Aged_1_128507	GGATTAGATACCCTGGTAGTCCACGCCGTAAACGATGAGTGCTAAGTGTTGGAGGGTTTCCGCTCTTCAGTGCTGCAGCTAACGCATTAAGCACTCCGCCTGGGGAGTACGGTCGCAAGACTGAAACTCAAAGGAATTGACGGGGACCCGCACAAGCGGTGGAGCATGTGGTTTAATTCGAAGCAACGCGAAGAACCTTACCAGGTCTTGACATCTCCTGACCACCCTAGAGATAGGGCTTTCCCTTCGGGGACAGGATGACAGGTGGTGCATGGTTGTCGTCAGCTCGTGTCGTGAGATGTTGGGTTAAGTCCCGCAACGAGCGCAACCC	GGATTAGATACCCTGGTAGTCCACGCCGTAAACGATGAGTGCTAAGTGTTGGAGGGTTTCCGCTCTTCAGTGCTGCAGCTAACGCATTAAGCACTCCGCCTGGGGAGTACGGTCGCAAGACTGAAACTCAAAGGAATTGACGGGGACCCGCACAAGCGGTGGAGCATGTGGTTTAATTCGAAGCAACGCGAAGAACCTTACCAGGTCTTGACATCTCCTGACCACCCTAGAGATAGGGCTTTCCCTTCGGGGACAGGATGACAGGTGGTGCATGGTTGTCGTCAGCTCGTGTCGTGAGATGTTGGGTTAAGTCCCGCAACGAGCGCAACCC	5	0	1	11	17	4.25	1	1	0	0	2	0.5	0	1	3	5	9	2.25	28	21	22	44	115	28.75	8
Bacillus_manusensis_1	S	2	0	Aged_2_135180	99.7	100	Y	Bacillus_manusensis	16SMicrobial|NR_159907.1	Bacillus_MS	2	Bacillus_aeolius;Bacillus_manusensis	nt|AB362281.1;nt|NR_159907.1	99.399/100.0;99.7/100.0	Bacteria	Firmicutes	Bacilli	Bacillales	Bacillaceae	Bacillus	Bacillus_manusensis	Aged_2_135180;Aged_2_124355	GGATTAGATACCCTGGTAGTCCACGCCGTAAACGATGAGTGCTAAGTGTTAGAGGGTTTCCGCCCTTTAGTGCTGCAGCTAACGCATTAAGCACTCCGCCTGGGGAGTACGGCCGCAAGGCTGAAACTCAAAGGAATTGACGGGGGCCCGCACAAGCGGTGGAGCATGTGGTTTAATTCGAAGCAACGCGAAGAACCTTACCAGGTCTTGACATCCTCCGCTACCTCTAGAGATAGAGGGTTCCCCTTCGGGGGACGGAGTGACAGGTGGTGCATGGTTGTCGTCAGCTCGTGTCGTGAGATGTTGGGTTAAGTCCCGCAACGAGCGCAACCC	GGATTAGATACCCTGGTAGTCCACGCCGTAAACGATGAGTGCTAAGTGTTAGAGGGTTTCCGCCCTTTAGTGCTGCAGCTAACGCATTAAGCACTCCGCCTGGGGAGTACGGCCGCAAGGCTGAAACTCAAAGGAATTGACGGGGGCCCGCACAAGCGGTGGAGCATGTGGTTTAATTCGAAGCAACGCGAAGAACCTTACCAGGTCTTGACATCCTCTGCTACCTCTAGAGATAGAGGGTTCCCCTTCGGGGGACGGAGTGACAGGTGGTGCATGGTTGTCGTCAGCTCGTGTCGTGAGATGTTGGGTTAAGTCCCGCAACGAGCGCAACCC	0	0	0	0	0	0	0	0	1	0	1	0.25	1	0	3	1	5	1.25	4	8	4	5	21	5.25	1
Bacillus_marasmi_1	S	1	0	Aged_1_125209	99.399	100	N	Bacillus_marasmi	16SMicrobial|NR_147397.1	-	-	-	-	-	Bacteria	Firmicutes	Bacilli	Bacillales	Bacillaceae	Bacillus	Bacillus_marasmi	Aged_1_125209	GGCTTAGATACCCTGGTAGTCCACGCCGTAAACGATGAGTGCTAAGTGTTAGAGGGTTTCCGCCCTTTAGTGCTGCAGCAAACGCATTAAGCACTCCGCCTGGGGAGTACGGCCGCAAGGCTGAAACTCAAAGGAATTGACGGGGGCCCGCACAAGCGGTGGAGCATGTGGTTTAATTCGAAGCAACGCGAAGAACCTTACCAGGTCTTGACATCCTCTGCCACTCCTAGAGATAGGATTTTCCCCTTCGGGGGACAGAGTGACAGGTGGTGCATGGTTGTCGTCAGCTCGTGTCGTGAGATGTTGGGTTAAGTCCCGCAACGAGCGCAACCC	GGATTAGATACCCTGGTAGTCCACGCCGTAAACGATGAGTGCTAAGTGTTAGAGGGTTTCCGCCCTTTAGTGCTGCAGCAAACGCATTAAGCACTCCGCCTGGGGAGTACGGCCGCAAGGCTGAAACTCAAAGGAATTGACGGGGGCCCGCACAAGCGGTGGAGCATGTGGTTTAATTCGAAGCAACGCGAAGAACCTTACCAGGTCTTGACATCCTTTGCCACTCCTAGAGATAGGATTTTCCCCTTCGGGGGACAAAGTGACAGGTGGTGCATGGTTGTCGTCAGCTCGTGTCGTGAGATGTTGGGTTAAGTCCCGCAACGAGCGCAACCC	0	0	0	0	0	0	0	0	0	0	0	0	2	2	2	2	8	2	93	62	127	121	403	100.75	45
Bacillus_maritimus_1	S	1	0	Aged_1_114927	100	100	N	Bacillus_maritimus	16SMicrobial|NR_156041.1	Bacillales_MS	8	Bacillales_foraminis;Bacillales_jeotgali;Bacillales_maritimus;Bacillales_subterraneus;Bacillus_foraminis;Bacillus_jeotgali;Bacillus_maritimus;Bacillus_subterraneus	nt|HM854268.1;nt|KU983819.1;nt|KY202701.1;nt|NR_156041.1;silva|HM854268.1.1416;silva|KP317497.1.1515;silva|KU983819.1.1448;silva|KY202701.1.1325;silva|LT714151.1.1359	100.0/100.0	Bacteria	Firmicutes	Bacilli	Bacillales	Bacillaceae	Bacillus	Bacillus_maritimus	Aged_1_114927;Aged_1_120810	GGATTAGATACCCTGGTAGTCCACGCCGTAAACGATGAGTGCTAAGTGTTAGAGGGTTTCCGCCCTTTAGTGCTGCAGCAAACGCATTAAGCACTCCGCCTGGGGAGTACGGCCGCAAGGCTGAAACTCAAAGGAATTGACGGGGGCCCGCACAAGCGGTGGAGCATGTGGTTTAATTCGAAGCAACGCGAAGAACCTTACCAGGTCTTGACATCCTCTGACACCTCTGGAGACAGAGCTTTCCCCTTCGGGGGACAGAGTGACAGGTGGTGCATGGTTGTCGTCAGCTCGTGTCGTGAGATGTTGGGTTAAGTCCCGCAACGAGCGCAACCC	GGATTAGATACCCTGGTAGTCCACGCCGTAAACGATGAGTGCTAAGTGTTAGAGGGTTTCCGCCCTTTAGTGCTGCAGCAAACGCATTAAGCACTCCGCCTGGGGAGTACGGCCGCAAGGCTGAAACTCAAAGGAATTGACGGGGGCCCGCACAAGCGGTGGAGCATGTGGTTTAATTCGAAGCAACGCGAAGAACCTTACCAGGTCTTGACATCCTCTGACACCTCTGGAGACAGAGCTTTCCCCTTCGGGGGACAGAGTGACAGGTGGTGCATGGTTGTCGTCAGCTCGTGTCGTGAGATGTTGGGTTAAGTCCCGCAACGAGCGCAACCC	0	0	0	0	0	0	0	1	0	0	1	0.25	0	2	0	9	11	2.75	167	331	343	233	1074	268.5	91
Bacillus_MS_1	S	1	3	Aged_1_153567	100	100	N	Bacillus_aryabhattai;Bacillus_flexus;Bacillus_megaterium	16SMicrobial|NR_024691.1;16SMicrobial|NR_043401.1;16SMicrobial|NR_115953.1	Bacteria_MS	17	Bacillales_aryabhattai;Bacillales_flexus;Bacillales_megaterium;Bacillus_acidiceler;Bacillus_aryabhattai;Bacillus_flexus;Bacillus_ginsengisoli;Bacillus_horikoshii;Bacillus_huizhouensis;Bacillus_magaterium;Bacillus_megaterium;Bacillus_meqaterium;Bacillus_oryzaecorticis;Bacillus_paraflexus;Bacillus_subtilis;Bacillus_tequilensis;Rodentibacter_pneumotropicus	nt|CP022674.1;nt|KY194724.1;nt|LC423523.1;nt|MF431753.1;nt|MF431763.1;nt|MG822729.1;nt|MH190221.1;nt|MH750443.1;nt|MH910265.1;nt|MK386891.1;nt|MK389282.1;silva|AHTF01000008.28.1559;silva|CP016790.145214.146766;silva|CP018878.60026.60904;silva|FR750269.1.1353;silva|KC608047.1.986;silva|KC969078.1.1447;silva|KF036191.1.1396;silva|KF054756.1.1484	100.0/100.0	Bacteria	Firmicutes	Bacilli	Bacillales	Bacillaceae	Bacillus	Bacillus_MS	Aged_3_115229;Aged_3_13869;Aged_1_153567;Aged_1_159951;Aged_1_64721;Aged_4_121161;Aged_1_123222;Aged_1_11684	GGATTAGATACCCTGGTAGTCCACGCCGTAAACGATGAGTGCTAAGTGTTAGAGGGTTTCCGCCCTTTAGTGCTGCAGCTAACGCATTAAGCACTCCGCCTGGGGAGTACGGTCGCAAGACTGAAACTCAAAGGAATTGACGGGGGCCCGCACAAGCGGTGGAGCATGTGGTTTAATTCGAAGCAACGCGAAGAACCTTACCAGGTCTTGACATCCTCTGACAACTCTAGAGATAGAGCGTTCCCCTTCGGGGGACAGAGTGACAGGTGGTGCATGGTTGTCGTCAGCTCGTGTCGTGAGATGTTGGGTTAAGTCCCGCAACGAGCGCAACCC	GGATTAGATACCCTGGTAGTCCACGCCGTAAACGATGAGTGCTAAGTGTTAGAGGGTTTCCGCCCTTTAGTGCTGCAGCTAACGCATTAAGCACTCCGCCTGGGGAGTACGGTCGCAAGACTGAAACTCAAAGGAATTGACGGGGGCCCGCACAAGCGGTGGAGCATGTGGTTTAATTCGAAGCAACGCGAAGAACCTTACCAGGTCTTGACATCCTCTGACAACTCTAGAGATAGAGCGTTCCCCTTCGGGGGACAGAGTGACAGGTGGTGCATGGTTGTCGTCAGCTCGTGTCGTGAGATGTTGGGTTAAGTCCCGCAACGAGCGCAACCC	0	0	0	0	0	0	2	6	0	4	12	3	19	21	9	7	56	14	6	9	4	5	24	6	5
Bacillus_MS_10	S	1	8	Aged_2_122955	100	100	N	Bacillus_aerius;Bacillus_altitudinis;Bacillus_australimaris;Bacillus_pumilus;Bacillus_safensis;Bacillus_stratosphericus;Bacillus_xiamenensis;Bacillus_zhangzhouensis	16SMicrobial|NR_041794.1;16SMicrobial|NR_042336.1;16SMicrobial|NR_042337.1;16SMicrobial|NR_043242.1;16SMicrobial|NR_118439.1;16SMicrobial|NR_148244.1;16SMicrobial|NR_148786.1;16SMicrobial|NR_148787.1	Bacteria_MS	16	Bacillales_pumilus;Bacillales_safensis;Bacillales_xiamenensis;Bacillus_aerius;Bacillus_aerophilus;Bacillus_altitudinis;Bacillus_amyloliquefaciens;Bacillus_australimaris;Bacillus_mojavensis;Bacillus_pumilus;Bacillus_safensis;Bacillus_stratosphericus;Bacillus_subtilis;Bacillus_xiamenensis;Bacillus_zhangzhouensis;Enterobacter_tabaci	nt|CP022319.2;nt|CP026008.1;nt|CP029464.1;nt|CP032830.1;nt|LC424992.1;nt|MG547928.1;nt|MG554645.1;nt|MG593979.1;nt|MG705798.1;nt|MG705900.1;nt|MH229993.1;silva|ABRX01000003.227653.229181;silva|AMSH01000114.63.1615;silva|APAS01000002.123.1651;silva|ASJC01000029.1.1549;silva|ASJD01000027.1.1549;silva|CP017786.1460006.1461556;silva|CYHK01000023.1.778;silva|JOTP01000061.52.1572;silva|JXRO01000013.5.1…	100.0/100.0	Bacteria	Firmicutes	Bacilli	Bacillales	Bacillaceae	Bacillus	Bacillus_MS	Aged_2_125436;Aged_4_102326;Aged_2_122955;Aged_1_29892;Aged_3_103119;Aged_4_142419;Aged_1_65413;Aged_2_112574	GGATTAGATACCCTGGTAGTCCACGCCGTAAACGATGAGTGCTAAGTGTTAGGGGGTTTCCGCCCCTTAGTGCTGCAGCTAACGCATTAAGCACTCCGCCTGGGGAGTACGGTCGCAAGACTGAAACTCAAAGGAATTGACGGGGGCCCGCACAAGCGGTGGAGCATGTGGTTTAATTCGAAGCAACGCGAAGAACCTTACCAGGTCTTGACATCCTCTGACAACCCTAGAGATAGGGCTTTCCCTTCGGGGACAGAGTGACAGGTGGTGCATGGTTGTCGTCAGCTCGTGTCGTGAGATGTTGGGTTAAGTCCCGCAACGAGCGCAACCC	GGATTAGATACCCTGGTAGTCCACGCCGTAAACGATGAGTGCTAAGTGTTAGGGGGTTTCCGCCCCTTAGTGCTGCAGCTAACGCATTAAGCACTCCGCCTGGGGAGTACGGTCGCAAGACTGAAACTCAAAGGAATTGACGGGGGCCCGCACAAGCGGTGGAGCATGTGGTTTAATTCGAAGCAACGCGAAGAACCTTACCAGGTCTTGACATCCTCTGACAACCCTAGAGATAGGGCTTTCCCTTCGGGGACAGAGTGACAGGTGGTGCATGGTTGTCGTCAGCTCGTGTCGTGAGATGTTGGGTTAAGTCCCGCAACGAGCGCAACCC	1	0	0	0	1	0.25	0	0	0	0	0	0	0	0	1	0	1	0.25	38	2	2	15	57	14.25	21
Bacillus_MS_11	S	4	2	Aged_2_46640	100	100	N	Bacillus_acidicola;Bacillus_simplex	16SMicrobial|NR_041942.1;16SMicrobial|NR_112726.1	Bacillales_MS	16	-;Bacillales_acidicola;Bacillales_aryabhattai;Bacillales_muralis;Bacillales_simplex;Bacillus_acidicola;Bacillus_huizhouensis;Bacillus_megaterium;Bacillus_muralis;Bacillus_oryzaecorticis;Bacillus_pumilus;Bacillus_simplex;Bacillus_subtilis;Bacillus_thuringiensis;Brevibacillus_choshinensis;Geobacillus_stearothermophilus;Paenibacillus_castaneae	-;nt|CP017704.1;nt|KU877639.1;nt|KU877671.1;nt|KU936343.1;nt|KX056928.1;nt|KX355763.1;nt|MF079344.1;nt|MF101006.1;nt|MH337985.1;nt|MK491041.1;silva|AF547209.1.1548;silva|AJ628743.1.1503;silva|AXBR01000002.36703.38233;silva|EU647709.1.1366;silva|EU977778.1.1280;silva|KC246043.1.1427;silva|KF982022.1.1423;silva|KM817283.1.1456;silva|LWJG01000002.2269639.2271171	-;100.0/100.0;99.399/100.0;99.7/100.0	Bacteria	Firmicutes	Bacilli	Bacillales	Bacillaceae	Bacillus	Bacillus_MS	Aged_3_75974;Aged_2_46640;Aged_3_17933	GGATTAGATACCCTGGTAGTCCACGCCGTAAACGATGAGTGCTAAGTGTTAGAGGGTTTCCGCCCTTTAGTGCTGCAGCTAACGCATTAAGCACTCCGCCTGGGGAGTACGGCCGCAAGGCTGAAACTCAAAGGAATTGACGGGGGCCCGCACAAGCGGTGGAGCATGTGGTTTAATTCGAAGCAACGCGAAGAACCTTACCAGGTCTTGACATCCTCTGACAACCCTAGAGATAGGGCTTTCCCCTTCGGGGGACAGAGTGACAGGTGGTGCATGGTTGTCGTCAGCTCGTGTCGTGAGATGTTGGGTTAAGTCCCGCAACGAGCGCGACCC	GGATTAGATACCCTGGTAGTCCACGCCGTAAACGATGAGTGCTAAGTGTTAGAGGGTTTCCGCCCTTTAGTGCTGCAGCTAACGCATTAAGCACTCCGCCTGGGGAGTACGGCCGCAAGGCTGAAACTCAAAGGAATTGACGGGGGCCCGCACAAGCGGTGGAGCATGTGGTTTAATTCGAAGCAACGCGAAGAACCTTACCAGGTCTTGACATCCTCTGACAACCCTAGAGATAGGGCTTTCCCCTTCGGGGGACAGAGTGACAGGTGGTGCATGGTTGTCGTCAGCTCGTGTCGTGAGATGTTGGGTTAAGTCCCGCAACGAGCGCAACCC	0	0	0	0	0	0	7	4	2	18	31	7.75	21	17	27	6	71	17.75	5	1	2	6	14	3.5	3
Bacillus_MS_12	S	1	5	Aged_1_102088	100	100	N	Bacillus_aerius;Bacillus_glycinifermentans;Bacillus_haynesii;Bacillus_licheniformis;Bacillus_paralicheniformis	16SMicrobial|NR_042338.1;16SMicrobial|NR_116023.1;16SMicrobial|NR_137407.1;16SMicrobial|NR_137421.1;16SMicrobial|NR_157609.1	Bacilli_MS	16	Bacillales_aerius;Bacillales_licheniformis;Bacillales_sonorensis;Bacillales_subtilis;Bacillus_aerius;Bacillus_amyloliquefaciens;Bacillus_cereus;Bacillus_glycinifermentans;Bacillus_haynesii;Bacillus_licheniformis;Bacillus_mojavensis;Bacillus_paralicheniformis;Bacillus_sonorensis;Bacillus_subtilis;Bacillus_velezensis;Streptococcus_mutans	nt|CP021970.1;nt|CP023665.1;nt|CP035232.1;nt|LT986226.1;nt|MF506755.1;nt|MG705609.1;nt|MG995013.1;nt|MH031691.1;nt|MH173808.1;nt|MH753629.1;nt|MH753656.1;silva|AJLV01000007.2.1465;silva|AZSK01000009.91.1398;silva|AZYP01000167.828.1651;silva|KC443099.1.1527;silva|KC883974.1.1418;silva|KF029598.1.1383;silva|KJ622304.1.1458;silva|KM817233.1.1516;silva|KP164479.1.1244;silva|LECV01000103.1.1255	100.0/100.0	Bacteria	Firmicutes	Bacilli	Bacillales	Bacillaceae	Bacillus	Bacillus_MS	Aged_1_13822;Aged_1_149155;Aged_1_102088;Aged_1_122792;Aged_1_108904;Aged_1_131403;Aged_1_102763;Aged_1_129060	GGATTAGATACCCTGGTAGTCCACGCCGTAAACGATGAGTGCTAAGTGTTAGAGGGTTTCCGCCCTTTAGTGCTGCAGCAAACGCATTAAGCACTCCGCCTGGGGAGTACGGTCGCAAGACTGAAACTCAAAGGAATTGACGGGGGCCCGCACAAGCGGTGGAGCATGTGGTTTAATTCGAAGCAACGCGAAGAACCTTACCAGGTCTTGACATCCTCTGACAACCCTAGAGATAGGGCTTCCCCTTCGGGGGCAGAGTGACAGGTGGTGCATGGTTGTCGTCAGCTCGTGTCGTGAGATGTTGGGTTAAGTCCCGCAACGAGCGCAACCC	GGATTAGATACCCTGGTAGTCCACGCCGTAAACGATGAGTGCTAAGTGTTAGAGGGTTTCCGCCCTTTAGTGCTGCAGCAAACGCATTAAGCACTCCGCCTGGGGAGTACGGTCGCAAGACTGAAACTCAAAGGAATTGACGGGGGCCCGCACAAGCGGTGGAGCATGTGGTTTAATTCGAAGCAACGCGAAGAACCTTACCAGGTCTTGACATCCTCTGACAACCCTAGAGATAGGGCTTCCCCTTCGGGGGCAGAGTGACAGGTGGTGCATGGTTGTCGTCAGCTCGTGTCGTGAGATGTTGGGTTAAGTCCCGCAACGAGCGCAACCC	0	0	0	0	0	0	4	1	13	4	22	5.5	9	8	3	6	26	6.5	11	12	17	4	44	11	0
Bacillus_MS_13	S	1	9	Aged_1_142835	100	100	N	Bacillus_cereus;Bacillus_marcorestinctum;Bacillus_mobilis;Bacillus_pacificus;Bacillus_paranthracis;Bacillus_proteolyticus;Bacillus_thuringiensis;Bacillus_toyonensis;Bacillus_wiedmannii	16SMicrobial|NR_043403.1;16SMicrobial|NR_074540.1;16SMicrobial|NR_117414.1;16SMicrobial|NR_121761.1;16SMicrobial|NR_152692.1;16SMicrobial|NR_157728.1;16SMicrobial|NR_157731.1;16SMicrobial|NR_157733.1;16SMicrobial|NR_157735.1	Bacilli_MS	20	Bacillales_cereus;Bacillales_subtilis;Bacillales_thuringiensis;Bacillus_albus;Bacillus_cereus;Bacillus_luti;Bacillus_mobilis;Bacillus_mycoides;Bacillus_oryzaecorticis;Bacillus_pacificus;Bacillus_paranthracis;Bacillus_proteolyticus;Bacillus_siamensis;Bacillus_simplex;Bacillus_subtilis;Bacillus_thuringiensis;Bacillus_toyonensis;Bacillus_velezensis;Bacillus_wiedmannii;Streptococcus_pneumoniae	nt|CP021436.1;nt|CP024684.1;nt|CP024771.1;nt|CP031443.1;nt|LC431769.1;nt|MF776026.1;nt|MG598450.1;nt|MG874770.1;nt|MH085042.1;nt|MK182932.1;nt|MK208579.1;silva|ACLT01000002.1.1372;silva|ACMZ01000011.62.1601;silva|AMYJ01000007.298764.300326;silva|AZNI01000050.3402.4733;silva|CRRK01000053.8598.10137;silva|FMBE01000005.24862.26401;silva|MRWT01000074.30.1573	100.0/100.0	Bacteria	Firmicutes	Bacilli	Bacillales	Bacillaceae	Bacillus	Bacillus_MS	Aged_1_142835;Aged_1_29959	GGATTAGATACCCTGGTAGTCCACGCCGTAAACGATGAGTGCTAAGTGTTAGAGGGTTTCCGCCCTTTAGTGCTGAAGTTAACGCATTAAGCACTCCGCCTGGGGAGTACGGCCGCAAGGCTGAAACTCAAAGGAATTGACGGGGGCCCGCACAAGCGGTGGAGCATGTGGTTTAATTCGAAGCAACGCGAAGAACCTTACCAGGTCTTGACATCCTCTGAAAACCCTAGAGATAGGGCTTCTCCTTCGGGAGCAGAGTGACAGGTGGTGCATGGTTGTCGTCAGCTCGTGTCGTGAGATGTTGGGTTAAGTCCCGCAACGAGCGCAACCC	GGATTAGATACCCTGGTAGTCCACGCCGTAAACGATGAGTGCTAAGTGTTAGAGGGTTTCCGCCCTTTAGTGCTGAAGTTAACGCATTAAGCACTCCGCCTGGGGAGTACGGCCGCAAGGCTGAAACTCAAAGGAATTGACGGGGGCCCGCACAAGCGGTGGAGCATGTGGTTTAATTCGAAGCAACGCGAAGAACCTTACCAGGTCTTGACATCCTCTGAAAACCCTAGAGATAGGGCTTCTCCTTCGGGAGCAGAGTGACAGGTGGTGCATGGTTGTCGTCAGCTCGTGTCGTGAGATGTTGGGTTAAGTCCCGCAACGAGCGCAACCC	0	0	0	0	0	0	0	0	0	0	0	0	2	0	3	0	5	1.25	5	16	6	9	36	9	1
Bacillus_MS_14	S	2	4	Aged_1_100357	100	100	N	Bacillus_circulans;Bacillus_dakarensis;Bacillus_gottheilii;Bacillus_koreensis	16SMicrobial|NR_104566.1;16SMicrobial|NR_108491.1;16SMicrobial|NR_116851.1;16SMicrobial|NR_147382.1	Bacillales_MS	15	-;Bacillales_bataviensis;Bacillales_circulans;Bacillales_dakarensis;Bacillales_gottheilii;Bacillales_nealsonii;Bacillus_bataviensis;Bacillus_circulans;Bacillus_dakarensis;Bacillus_foraminis;Bacillus_gottheilii;Bacillus_koreensis;Bacillus_licheniformis;Bacillus_nealsonii;Bacillus_stamsii;Bacillus_subtilis	-;nt|AB215100.1;nt|HF570091.1;nt|HM355635.1;nt|KC433938.1;nt|KX815991.1;nt|MF319807.1;nt|MF319814.1;nt|MG651129.1;nt|NR_116851.1;nt|NR_147382.1;silva|AB215100.1.1510;silva|ASRU01000318.1.855;silva|FJ889614.1.1517;silva|FN995266.1.1512;silva|FTOZ01000011.63905.65435;silva|FUVC01000007.436.1966;silva|HF570091.1.1464;silva|HG530920.1.1015;silva|HM355635.1.1275;silva|KC433938.1.1509	-;100.0/100.0	Bacteria	Firmicutes	Bacilli	Bacillales	Bacillaceae	Bacillus	Bacillus_MS	Aged_1_146001;Aged_1_154769;Aged_1_100357;Aged_1_107029;Aged_1_161302;Aged_2_54770;Aged_1_128103;Aged_1_36585	GGATTAGATACCCTGGTAGTCCACGCCGTAAACGATGAGTGCTAAGTGTTAGAGGGTTTCCGCCCTTTAGTGCTGCAGCAAACGCATTAAGCACTCCGCCTGGGGAGTACGGCCGCAAGGCTGAAACTCAAAGGAATTGACGGGGGCCCGCACAAGCGGTGGAGCATGTGGTTTAATTCGAAGCAACGCGAAGAACCTTACCAGGTCTTGACATCCTCTGACACTCCTAGAGATAGGACGTTCCCCTTCGGGGGACAGAGTGACAGGTGGTGCATGGTTGTCGTCAGCTCGTGTCGTGAGATGTTGGGTTAAGTCCCGCAACGAGCGCAACCC	GGATTAGATACCCTGGTAGTCCACGCCGTAAACGATGAGTGCTAAGTGTTAGAGGGTTTCCGCCCTTTAGTGCTGCAGCAAACGCATTAAGCACTCCGCCTGGGGAGTACGGCCGCAAGGCTGAAACTCAAAGGAATTGACGGGGGCCCGCACAAGCGGTGGAGCATGTGGTTTAATTCGAAGCAACGCGAAGAACCTTACCAGGTCTTGACATCCTCTGACACTCCTAGAGATAGGACGTTCCCCTTCGGGGGACAGAGTGACAGGTGGTGCATGGTTGTCGTCAGCTCGTGTCGTGAGATGTTGGGTTAAGTCCCGCAACGAGCGCAACCC	0	0	0	0	0	0	0	0	1	0	1	0.25	3	3	0	5	11	2.75	20	16	35	93	164	41	24
Bacillus_MS_15	S	1	3	Aged_1_108661	100	100	N	Bacillus_abyssalis;Bacillus_songklensis;Bacillus_thaonhiensis	16SMicrobial|NR_109443.1;16SMicrobial|NR_109671.1;16SMicrobial|NR_125615.1	Bacillales_MS	9	Bacillales_songklensis;Bacillales_thaonhiensis;Bacillales_vireti;Bacillus_abyssalis;Bacillus_fengqiuensis;Bacillus_sediminis;Bacillus_songklensis;Bacillus_thaonhiensis;Bacillus_vireti	nt|GQ304780.1;nt|JN637371.1;nt|KP453778.1;nt|KX373482.1;nt|MH714700.1;nt|NR_109671.1;silva|GQ304780.1.1517;silva|JN036548.1.1528;silva|JQ796719.1.1468;silva|JX232168.1.1405;silva|KP453778.1.1399;silva|KP866893.1.1422;silva|KX373482.1.1317	100.0/100.0	Bacteria	Firmicutes	Bacilli	Bacillales	Bacillaceae	Bacillus	Bacillus_MS	Aged_2_128731;Aged_2_24499;Aged_1_108661;Aged_1_19351;Aged_1_145812;Aged_1_73818;Aged_1_100281;Aged_1_112975	GGATTAGATACCCTGGTAGTCCACGCCGTAAACGATGAGTGCTAAGTGTTAGGGGGTTTCCGCCCCTTAGTGCTGCAGCTAACGCATTAAGCACTCCGCCTGGGGAGTACGGCCGCAAGGCTGAAACTCAAAGGAATTGACGGGGGCCCGCACAAGCGGTGGAGCATGTGGTTTAATTCGAAGCAACGCGAAGAACCTTACCAGGTCTTGACATCCTCTGACAACTCTAGAGATAGAGCGTTCCCCTTCGGGGGACAGAGTGACAGGTGGTGCATGGTTGTCGTCAGCTCGTGTCGTGAGATGTTGGGTTAAGTCCCGCAACGAGCGCAACCC	GGATTAGATACCCTGGTAGTCCACGCCGTAAACGATGAGTGCTAAGTGTTAGGGGGTTTCCGCCCCTTAGTGCTGCAGCTAACGCATTAAGCACTCCGCCTGGGGAGTACGGCCGCAAGGCTGAAACTCAAAGGAATTGACGGGGGCCCGCACAAGCGGTGGAGCATGTGGTTTAATTCGAAGCAACGCGAAGAACCTTACCAGGTCTTGACATCCTCTGACAACTCTAGAGATAGAGCGTTCCCCTTCGGGGGACAGAGTGACAGGTGGTGCATGGTTGTCGTCAGCTCGTGTCGTGAGATGTTGGGTTAAGTCCCGCAACGAGCGCAACCC	0	0	0	0	0	0	13	25	25	11	74	18.5	64	26	13	8	111	27.75	6	3	23	7	39	9.75	17
Bacillus_MS_16	S	1	2	Aged_2_41678	100	100	N	Bacillus_hisashii;Bacillus_thermoamylovorans	16SMicrobial|NR_117028.1;16SMicrobial|NR_144578.1	Bacillales_MS	4	Bacillales_thermoamylovorans;Bacillus_circulans;Bacillus_hisashii;Bacillus_thermoamylovorans	nt|AB121094.1;nt|AB909962.1;nt|Y13064.1;silva|AB121094.1.1451;silva|AB618491.1.1506;silva|AY197332.1.510;silva|Y13064.1.1473	100.0/100.0	Bacteria	Firmicutes	Bacilli	Bacillales	Bacillaceae	Bacillus	Bacillus_MS	Aged_4_136617;Aged_2_79858;Aged_2_41678;Aged_4_55837;Aged_3_73357;Aged_2_101484;Aged_1_140665	GGATTAGATACCCTGGTAGTCCACGCCGTAAACGATGAGTGCTAAGTGTTGGAGGGTTTCCGCCCTTCAGTGCTGCAGCTAACGCATTAAGCACTCCGCCTGGGGAGTACGGTCGCAAGACTGAAACTCAAAGGAATTGACGGGGGCCCGCACAAGCGGTGGAGCATGTGGTTTAATTCGAAGCAACGCGAAGAACCTTACCAGGTCTTGACATCTCCTGACCGCCCTGGAGACAGGGTCTTCCCTTCGGGGACAGGATGACAGGTGGTGCATGGTTGTCGTCAGCTCGTGTCGTGAGATGTTGGGTTAAGTCCCGCAACGAGCGCAACCC	GGATTAGATACCCTGGTAGTCCACGCCGTAAACGATGAGTGCTAAGTGTTGGAGGGTTTCCGCCCTTCAGTGCTGCAGCTAACGCATTAAGCACTCCGCCTGGGGAGTACGGTCGCAAGACTGAAACTCAAAGGAATTGACGGGGGCCCGCACAAGCGGTGGAGCATGTGGTTTAATTCGAAGCAACGCGAAGAACCTTACCAGGTCTTGACATCTCCTGACCGCCCTGGAGACAGGGTCTTCCCTTCGGGGACAGGATGACAGGTGGTGCATGGTTGTCGTCAGCTCGTGTCGTGAGATGTTGGGTTAAGTCCCGCAACGAGCGCAACCC	1	5	1	0	7	1.75	581	172	1330	1848	3931	982.75	847	1660	386	3224	6117	1529.25	72	132	147	202	553	138.25	91
Bacillus_MS_17	S	2	2	Aged_1_123715	100	100	N	Bacillus_endozanthoxylicus;Bacillus_oryzisoli	16SMicrobial|NR_151979.1;16SMicrobial|NR_158107.1	Bacillales_MS	7	Bacillales_oryzisoli;Bacillales_soli;Bacillus_benzoevorans;Bacillus_endozanthoxylicus;Bacillus_nealsonii;Bacillus_oryzisoli;Bacillus_soli	nt|JF682056.1;nt|KU983845.1;nt|LT631765.1;nt|MH324761.1;nt|NR_158107.1;silva|JF682056.1.1356;silva|KT886063.1.1507;silva|KU983845.1.1447;silva|LT631765.1.1194	100.0/100.0;99.7/100.0	Bacteria	Firmicutes	Bacilli	Bacillales	Bacillaceae	Bacillus	Bacillus_MS	Aged_1_3673;Aged_1_49275;Aged_1_123715;Aged_1_110382;Aged_1_8858;Aged_1_102884	GGATTAGATACCCTGGTAGTCCACGCCGTAAACGATGAGTGCTAAGTGTTAGAGGGTTTCCGCCCTTTAGTGCTGCAGCAAACGCATTAAGCACTCCGCCTGGGGAGTACGGCCGCAAGGCTGAAACTCAAAGGAATTGACGGGGACCCGCACAAGCGGTGGAGCATGTGGTTTAATTCGAAGCAACGCGAAGAACCTTACCAGGTCTTGACATCCTCTGACAATCCTAGAGATAGGACGTTCCCCTTCGGGGGACAGAGTGACAGGTGGTGCATGGTTGTCGTCAGCTCGTGTCGTGAGATGTTGGGTTAAGTCCCGCAACGAGCGCAACCC	GGATTAGATACCCTGGTAGTCCACGCCGTAAACGATGAGTGCTAAGTGTTAGAGGGTTTCCGCCCTTTAGTGCTGCAGCAAACGCATTAAGCACTCCGCCTGGGGAGTACGGCCGCAAGGCTGAAACTCAAAGGAATTGACGGGGACCCGCACAAGCGGTGGAGCATGTGGTTTAATTCGAAGCAACGCGAAGAACCTTACCAGGTCTTGACATCCTCTGACAATCCTAGAGATAGGACGTTCCCCTTCGGGGGACAGAGTGACAGGTGGTGCATGGTTGTCGTCAGCTCGTGTCGTGAGATGTTGGGTTAAGTCCCGCAACGAGCGCAACCC	0	0	0	0	0	0	0	0	0	0	0	0	0	0	0	1	1	0.25	8	18	21	6	53	13.25	13
Bacillus_MS_18	S	1	2	Aged_1_151496	100	100	N	Bacillus_cellulasensis;Bacillus_niabensis	nt|AB271138.1;nt|HQ858013.1;silva|AB271138.1.1475;silva|HQ858013.1.1421	-	-	-	-	-	Bacteria	Firmicutes	Bacilli	Bacillales	Bacillaceae	Bacillus	Bacillus_MS	Aged_1_35542;Aged_1_151496;Aged_1_40912;Aged_1_133752;Aged_2_109893	GGATTAGATACCCTGGTAGTCCACGCCGTAAACGATGAGTGCTAAGTGTTAGAGGGTTTCCGCCCTTTAGTGCTGCAGCAAACGCATTAAGCACTCCGCCTGGGGAGTACGGTCGCAAGACTGAAACTCAAAGGAATTGACGGGGGCCCGCACAAGCGGTGGAGCATGTGGTTTAATTCGAAGCAACGCGAAGAACCTTACCAGGTCTTGACATCCTTCGCTACTTCTAGAGATAGAAGGTTCCCCTTCGGGGGACGGAGTGACAGGTGGTGCATGGTTGTCGTCAGCTCGTGTCGTGAGATGTTGGGTTAAGTCCCGCAACGAGCGCAACCC	GGATTAGATACCCTGGTAGTCCACGCCGTAAACGATGAGTGCTAAGTGTTAGAGGGTTTCCGCCCTTTAGTGCTGCAGCAAACGCATTAAGCACTCCGCCTGGGGAGTACGGTCGCAAGACTGAAACTCAAAGGAATTGACGGGGGCCCGCACAAGCGGTGGAGCATGTGGTTTAATTCGAAGCAACGCGAAGAACCTTACCAGGTCTTGACATCCTTCGCTACTTCTAGAGATAGAAGGTTCCCCTTCGGGGGACGGAGTGACAGGTGGTGCATGGTTGTCGTCAGCTCGTGTCGTGAGATGTTGGGTTAAGTCCCGCAACGAGCGCAACCC	0	0	0	0	0	0	4	0	0	0	4	1	1	0	1	3	5	1.25	19	11	10	6	46	11.5	15
Bacillus_MS_19	S	9	2	Aged_1_10054	100	100	N	Bacillus_kokeshiiformis;Bacillus_thermolactis	nt|AM910183.1;nt|KX155844.1;silva|AM910183.1.1509;silva|KX155844.1.1399	-	-	-	-	-	Bacteria	Firmicutes	Bacilli	Bacillales	Bacillaceae	Bacillus	Bacillus_MS	Aged_1_28449;Aged_1_4188;Aged_4_86878;Aged_1_111110;Aged_1_113019;Aged_1_10054;Aged_1_100720;Aged_2_12874;Compost_1_108594;Aged_2_142471;Aged_2_128867;Compost_1_70328;Aged_1_102270;Aged_1_116541;Aged_1_101093;Aged_1_104491;Aged_1_52172;Aged_3_165288;Aged_3_121959	GGATTAGATACCCTGGTAGTCCACGCCGTAAACGATGAGTGCTAAGTGTTGGAGGGTTTCCGCCCTTCAGTGCTGCAGCTAACGCATTAAGCACTCCGCCTGGGGAGTACGGTCGCAAGACTGAAACTCAAAGGAATTGACGGGGACCCGCACAAGCGGTGGAGCATGTGGTTTAATTCGAAGCAACGCGAAGAACCTTACCAGGTCTTGACATCTCCTGACCACCCTAGAGATAGGGCTTTCCCTTCGGGGACAGGATGACAGGTGGTGCATGGTTGTCGTCAGCTCGTGTCGTGAGATGTTGGGTTAAGTCCCGCAACGAGCGCAACCC	GGATTAGATACCCTGGTAGTCCACGCCGTAAACGATGAGTGCTAAGTGTTGGAGGGTTTCCGCCCTTCAGTGCTGCAGCTAACGCATTAAGCACTCCGCCTGGGGAGTACGGTCGCAAGACTGAAACTCAAAGGAATTGACGGGGACCCGCACAAGCGGTGGAGCATGTGGTTTAATTCGAAGCAACGCGAAGAACCTTACCAGGTCTTGACATCTCCTGACCACCCTAGAGATAGGGCTTTCCCTTCGGGGACAGGATGACAGGTGGTGCATGGTTGTCGTCAGCTCGTGTCGTGAGATGTTGGGTTAAGTCCCGCAACGAGCGCAACCC	0	0	0	0	0	0	9	1	2	10	22	5.5	7	22	6	4	39	9.75	30	23	24	29	106	26.5	12
Bacillus_MS_2	S	1	8	Aged_1_109908	100	100	N	Bacillus_amyloliquefaciens;Bacillus_mojavensis;Bacillus_nakamurai;Bacillus_nematocida;Bacillus_subtilis;Bacillus_tequilensis;Bacillus_vallismortis;Bacillus_velezensis	16SMicrobial|NR_024693.1;16SMicrobial|NR_024696.1;16SMicrobial|NR_024931.1;16SMicrobial|NR_041455.1;16SMicrobial|NR_075005.2;16SMicrobial|NR_104919.1;16SMicrobial|NR_115325.1;16SMicrobial|NR_151897.1	Bacteria_MS	15	Bacillus_altitudinis;Bacillus_amyloliquefaciens;Bacillus_atrophaeus;Bacillus_cereus;Bacillus_endophyticus;Bacillus_licheniformis;Bacillus_mojavensis;Bacillus_nakamurai;Bacillus_pumilus;Bacillus_siamensis;Bacillus_subtilis;Bacillus_tequilensis;Bacillus_vallismortis;Bacillus_velezensis;Microbacterium_barkeri	nt|CP029609.1;nt|CP032146.1;nt|CP033576.1;nt|KY194710.1;nt|LR535796.1;nt|MF685244.1;nt|MG988222.1;nt|MG988246.1;nt|MK120888.1;nt|MK168591.1;nt|MK240356.1;silva|FNER01000016.1.1413;silva|LM643740.1.979;silva|LT617063.1.1295	100.0/100.0	Bacteria	Firmicutes	Bacilli	Bacillales	Bacillaceae	Bacillus	Bacillus_MS	Aged_4_163507;Aged_2_118626;Aged_1_109908;Aged_1_156876;Aged_2_128934;Aged_2_48022;Aged_1_150644;Aged_1_132852	GGATTAGATACCCTGGTAGTCCACGCCGTAAACGATGAGTGCTAAGTGTTAGGGGGTTTCCGCCCCTTAGTGCTGCAGCTAACGCATTAAGCACTCCGCCTGGGGAGTACGGTCGCAAGACTGAAACTCAAAGGAATTGACGGGGGCCCGCACAAGCGGTGGAGCATGTGGTTTAATTCGAAGCAACGCGAAGAACCTTACCAGGTCTTGACATCCTCTGACAATCCTAGAGATAGGACGTCCCCTTCGGGGGCAGAGTGACAGGTGGTGCATGGTTGTCGTCAGCTCGTGTCGTGAGATGTTGGGTTAAGTCCCGCAACGAGCGCAACCC	GGATTAGATACCCTGGTAGTCCACGCCGTAAACGATGAGTGCTAAGTGTTAGGGGGTTTCCGCCCCTTAGTGCTGCAGCTAACGCATTAAGCACTCCGCCTGGGGAGTACGGTCGCAAGACTGAAACTCAAAGGAATTGACGGGGGCCCGCACAAGCGGTGGAGCATGTGGTTTAATTCGAAGCAACGCGAAGAACCTTACCAGGTCTTGACATCCTCTGACAATCCTAGAGATAGGACGTCCCCTTCGGGGGCAGAGTGACAGGTGGTGCATGGTTGTCGTCAGCTCGTGTCGTGAGATGTTGGGTTAAGTCCCGCAACGAGCGCAACCC	1	0	0	0	1	0.25	89	57	63	163	372	93	279	136	146	159	720	180	49	37	22	70	178	44.5	13
Bacillus_MS_20	S	1	2	Aged_1_67812	99.7	100	N	Bacillus_psychrosaccharolyticus;Bacillus_soli	nt|LT223632.1;nt|MG011580.1	-	-	-	-	-	Bacteria	Firmicutes	Bacilli	Bacillales	Bacillaceae	Bacillus	Bacillus_MS	Aged_2_93528;Aged_4_191487;Aged_1_67812;Aged_1_156712;Aged_1_55767;Aged_3_149157;Aged_1_101792;Aged_2_40120	GGATTAGATACCCTGGTAGTCCACGCCGTAAACGATGAGTGCTAAGTGTTAGAGGGTTTCCGCCCTTTAGTGCTGCAGCTAACGCATTAAGCACTCCGCCTGGGGAGTACGGCCGCAAGGCTGAAACTCAAAGGAATTGACGGGGGCCCGCACAAGCGGTGGAGCATGTGGTTTAATTCGAAGCAACGCGAAGAACCTTACCAGGTCTTGACATCCTCTGCCACTCCTAGAGATAGGAGGTTCCCCTTCGGGGGACAGAGTGACAGGTGGTGCATGGTTGTCGTCAGCTCGTGTCGTGAGATGTTGGGTTAAGTCCCGCAACGAGCGCAACCC	GGATTAGATACCCTGGTAGTCCACGCCGTAAACGATGAGTGCTAAGTGTTAGAGGGTTTCCGCCCTTTAGTGCTGCAGCTAACGCATTAAGCACTCCGCCTGGGGAGTACGGCCGCAAGGCTGAAACTCAAAGGAATTGACGGGGGCCCGCACAAGCGGTGGAGCATGTGGTTTAATTCGAAGCAACGCGAAGAACCTTACCAGGTCTTGACATCCTCTGCCACTCCTAGAGATAGGACGTTCCCCTTCGGGGGACAGAGTGACAGGTGGTGCATGGTTGTCGTCAGCTCGTGTCGTGAGATGTTGGGTTAAGTCCCGCAACGAGCGCAACCC	0	0	0	0	0	0	1	0	0	0	1	0.25	2	0	0	4	6	1.5	62	141	126	137	466	116.5	36
Bacillus_MS_3	S	1	6	Aged_1_119830	99.399	100	N	Bacillus_circulans;Bacillus_dakarensis;Bacillus_depressus;Bacillus_gottheilii;Bacillus_koreensis;Bacillus_niacini	16SMicrobial|NR_024695.1;16SMicrobial|NR_104566.1;16SMicrobial|NR_108491.1;16SMicrobial|NR_116851.1;16SMicrobial|NR_146034.1;16SMicrobial|NR_147382.1	-	-	-	-	-	Bacteria	Firmicutes	Bacilli	Bacillales	Bacillaceae	Bacillus	Bacillus_MS	Aged_1_26839;Aged_1_23195;Aged_1_119830;Aged_1_145916;Aged_1_32592;Aged_4_149026;Aged_1_132409;Aged_1_100172	GGATTAGATACCCTGGTAGTCCACGCCGTAAACGATGAGTGCTAAGTGTTAGAGGGTTTCCGCCCTTTAGTGCTGCAGCAAACGCATTAAGCACTCCGCCTGGGGAGTACGGCCGCAAGGCTGAAACTCAAAGGAATTGACGGGGGCCCGCACAAGCGGTGGAGCATGTGGTTTAATTCGAAGCAACGCGAAGAACCTTACCAGGTCTTGACATCCTCTGCCACTCCTAGAGATAGGACTTTCCCCTTCGGGGGACAGAGTGACAGGTGGTGCATGGTTGTCGTCAGCTCGTGTCGTGAGATGTTGGGTTAAGTCCCGCAACGAGCGCAACCC	GGATTAGATACCCTGGTAGTCCACGCCGTAAACGATGAGTGCTAAGTGTTAGAGGGTTTCCGCCCTTTAGTGCTGCAGCTAACGCATTAAGCACTCCGCCTGGGGAGTACGGCCGCAAGGCTGAAACTCAAAGGAATTGACGGGGGCCCGCACAAGCGGTGGAGCATGTGGTTTAATTCGAAGCAACGCGAAGAACCTTACCAGGTCTTGACATCCTCTGACACTCCTAGAGATAGGACTTTCCCCTTCGGGGGACAGAGTGACAGGTGGTGCATGGTTGTCGTCAGCTCGTGTCGTGAGATGTTGGGTTAAGTCCCGCAACGAGCGCAACCC	0	0	0	0	0	0	1	0	0	0	1	0.25	4	4	7	1	16	4	7	0	1	2	10	2.5	0
Bacillus_MS_4	S	1	2	Aged_1_102212	100	100	N	Bacillus_depressus;Bacillus_niacini	16SMicrobial|NR_024695.1;16SMicrobial|NR_146034.1	Bacillales_MS	15	Bacillales_arbutinivorans;Bacillales_bataviensis;Bacillales_drentensis;Bacillales_niacini;Bacillales_novalis;Bacillus_arbutinivorans;Bacillus_bataviensis;Bacillus_depressus;Bacillus_dielmoensis;Bacillus_drentensis;Bacillus_mesonae;Bacillus_niacini;Bacillus_novalis;Bacillus_pocheonensis;Bacillus_soli	nt|AB738789.1;nt|CP022572.1;nt|EU334358.1;nt|FJ232486.1;nt|HG315676.1;nt|HQ857753.1;nt|JN700154.1;nt|JQ833351.1;nt|KX396554.1;nt|NR_146034.1;silva|AB021194.1.1526;silva|AY167817.1.1338;silva|CCAD010000001.1.1318;silva|DI339172.177.1671;silva|FJ232486.1.784;silva|HQ857753.1.1454;silva|JN700154.1.1393;silva|JQ833351.1.567;silva|KC854896.1.1483;silva|KM401867.1.1070;silva|KP259553.1.1459	100.0/100.0	Bacteria	Firmicutes	Bacilli	Bacillales	Bacillaceae	Bacillus	Bacillus_MS	Aged_1_61814;Aged_2_50855;Aged_1_102212;Aged_1_53631	GGCTTAGATACCCTGGTAGTCCACGCCGTAAACGATGAGTGCTAAGTGTTAGAGGGTTTCCGCCCTTTAGTGCTGCAGCTAACGCATTAAGCACTCCGCCTGGGGAGTACGGCCGCAAGGCTGAAACTCAAAGGAATTGACGGGGGCCCGCACAAGCGGTGGAGCATGTGGTTTAATTCGAAGCAACGCGAAGAACCTTACCAGGTCTTGACATCCTCTGACACTCCTAGAGATAGGACTTTCCCCTTCGGGGGACAGAGTGACAGGTGGTGCATGGTTGTCGTCAGCTCGTGTCGTGAGATGTTGGGTTAAGTCCCGCAACGAGCGCAACCC	GGATTAGATACCCTGGTAGTCCACGCCGTAAACGATGAGTGCTAAGTGTTAGAGGGTTTCCGCCCTTTAGTGCTGCAGCTAACGCATTAAGCACTCCGCCTGGGGAGTACGGCCGCAAGGCTGAAACTCAAAGGAATTGACGGGGGCCCGCACAAGCGGTGGAGCATGTGGTTTAATTCGAAGCAACGCGAAGAACCTTACCAGGTCTTGACATCCTCTGACACTCCTAGAGATAGGACTTTCCCCTTCGGGGGACAGAGTGACAGGTGGTGCATGGTTGTCGTCAGCTCGTGTCGTGAGATGTTGGGTTAAGTCCCGCAACGAGCGCAACCC	0	0	0	0	0	0	0	0	0	0	0	0	0	0	0	1	1	0.25	3	0	12	14	29	7.25	0
Bacillus_MS_5	S	1	6	Aged_1_130981	100	100	N	Bacillus_boroniphilus;Bacillus_foraminis;Bacillus_jeotgali;Bacillus_selenatarsenatis;Bacillus_subterraneus;Bacillus_thioparans	16SMicrobial|NR_025060.1;16SMicrobial|NR_041275.1;16SMicrobial|NR_041465.1;16SMicrobial|NR_042274.1;16SMicrobial|NR_043762.1;16SMicrobial|NR_104749.1	Bacteria_MS	21	Bacillales_asahii;Bacillales_beringensis;Bacillales_boroniphilus;Bacillales_foraminis;Bacillales_jeotgali;Bacillales_korlensis;Bacillales_selenatarsenatis;Bacillales_subterraneus;Bacillales_thioparans;Bacillus_asahii;Bacillus_beringensis;Bacillus_boroniphilus;Bacillus_coreaensis;Bacillus_foraminis;Bacillus_jeotgali;Bacillus_korlensis;Bacillus_oceanisediminis;Bacillus_selenatarsenatis;Bacillus_sub…	nt|AB198718.1;nt|AF221062.1;nt|CP033044.1;nt|EU239470.1;nt|FJ607352.1;nt|FR695446.1;nt|HQ326991.1;nt|JQ026324.1;nt|JQ684234.1;nt|KT720279.1;nt|MG593555.1;silva|AB198718.1.1493;silva|AB262082.1.1413;silva|AF221061.1.1505;silva|AJ717382.1.1534;silva|BCVH01000052.1.1444;silva|DQ371431.1.1472;silva|FR733689.1.1539;silva|HQ326991.1.1099;silva|JN578481.1.1459;silva|JQ026324.1.1369;silva|KT720279.1.1422	100.0/100.0	Bacteria	Firmicutes	Bacilli	Bacillales	Bacillaceae	Bacillus	Bacillus_MS	Aged_1_63943;Aged_2_65767;Aged_1_130981;Aged_1_29301	GGCTTAGATACCCTGGTAGTCCACGCCGTAAACGATGAGTGCTAAGTGTTAGAGGGTTTCCGCCCTTTAGTGCTGCAGCAAACGCATTAAGCACTCCGCCTGGGGAGTACGGCCGCAAGGCTGAAACTCAAAGGAATTGACGGGGGCCCGCACAAGCGGTGGAGCATGTGGTTTAATTCGAAGCAACGCGAAGAACCTTACCAGGTCTTGACATCCTCTGACAACCCTAGAGATAGGGCGTTCCCCTTCGGGGGACAGAGTGACAGGTGGTGCATGGTTGTCGTCAGCTCGTGTCGTGAGATGTTGGGTTAAGTCCCGCAACGAGCGCAACCC	GGATTAGATACCCTGGTAGTCCACGCCGTAAACGATGAGTGCTAAGTGTTAGAGGGTTTCCGCCCTTTAGTGCTGCAGCAAACGCATTAAGCACTCCGCCTGGGGAGTACGGCCGCAAGGCTGAAACTCAAAGGAATTGACGGGGGCCCGCACAAGCGGTGGAGCATGTGGTTTAATTCGAAGCAACGCGAAGAACCTTACCAGGTCTTGACATCCTCTGACAACCCTAGAGATAGGGCGTTCCCCTTCGGGGGACAGAGTGACAGGTGGTGCATGGTTGTCGTCAGCTCGTGTCGTGAGATGTTGGGTTAAGTCCCGCAACGAGCGCAACCC	0	0	0	0	0	0	20	5	14	39	78	19.5	39	80	57	8	184	46	16	3	8	9	36	9	3
Bacillus_MS_6	S	1	4	Aged_1_64503	100	100	N	Bacillus_enclensis;Bacillus_marisflavi;Bacillus_oryzaecorticis;Bacillus_tianshenii	16SMicrobial|NR_025240.1;16SMicrobial|NR_133700.1;16SMicrobial|NR_133704.2;16SMicrobial|NR_133977.1	Bacteria_MS	26	Bacillales_aquimaris;Bacillales_baekryungensis;Bacillales_enclensis;Bacillales_firmus;Bacillales_haikouensis;Bacillales_halmapalus;Bacillales_marisflavi;Bacillales_oryzaecorticis;Bacillales_subtilis;Bacillales_tianshenii;Bacillales_vietnamensis;Bacillus_aquimaris;Bacillus_enclensis;Bacillus_ferrariarum;Bacillus_haikouensis;Bacillus_halmapalus;Bacillus_horikoshii;Bacillus_marisflavi;Bacillus_oryza…	nt|HE863746.1;nt|KC920911.1;nt|KF811034.1;nt|KJ161403.1;nt|KJ719334.1;nt|KP208618.1;nt|KT758411.1;nt|KT758511.1;nt|KT803955.1;nt|KX033475.1;nt|KY849427.1;silva|AB617546.1.1442;silva|AB617551.1.1438;silva|EU835731.1.1466;silva|FR695434.1.1503;silva|HQ397584.1.1425;silva|JQ640582.1.1489;silva|KF811034.1.1571;silva|KJ161403.1.1383;silva|KJ719334.1.1398;silva|KT758511.1.866;silva|KT803955.1.824	100.0/100.0	Bacteria	Firmicutes	Bacilli	Bacillales	Bacillaceae	Bacillus	Bacillus_MS	Aged_1_64503;Aged_3_137884	GGATTAGATACCCTGGTAGTCCACGCCGTAAACGATGAGTGCTAAGTGTTAGAGGGTTTCCGCCCTTTAGTGCTGCAGCTAACGCATTAAGCACTCCGCCTGGGGAGTACGGTCGCAAGACTGAAACTCAAAGGAATTGACGGGGGCCCGCACAAGCGGTGGAGCATGTGGTTTAATTCGAAGCAACGCGAAGAACCTTACCAGGTCTTGACATCCTCTGACAACCCTAGAGATAGGGCTTTCCCCTTCGGGGGACAGAGTGACAGGTGGTGCATGGTTGTCGTCAGCTCGTGTCGTGAGATGTTGGGTTAAGTCCCGCAACGAGCGCAACCC	GGATTAGATACCCTGGTAGTCCACGCCGTAAACGATGAGTGCTAAGTGTTAGAGGGTTTCCGCCCTTTAGTGCTGCAGCTAACGCATTAAGCACTCCGCCTGGGGAGTACGGTCGCAAGACTGAAACTCAAAGGAATTGACGGGGGCCCGCACAAGCGGTGGAGCATGTGGTTTAATTCGAAGCAACGCGAAGAACCTTACCAGGTCTTGACATCCTCTGACAACCCTAGAGATAGGGCTTTCCCCTTCGGGGGACAGAGTGACAGGTGGTGCATGGTTGTCGTCAGCTCGTGTCGTGAGATGTTGGGTTAAGTCCCGCAACGAGCGCAACCC	0	0	0	0	0	0	0	0	0	0	0	0	1	5	7	8	21	5.25	61	77	54	72	264	66	50
Bacillus_MS_7	S	1	5	Aged_1_92782	100	100	N	Bacillus_bataviensis;Bacillus_drentensis;Bacillus_novalis;Bacillus_soli;Bacillus_vireti	16SMicrobial|NR_025591.1;16SMicrobial|NR_029002.1;16SMicrobial|NR_036766.1;16SMicrobial|NR_042168.1;16SMicrobial|NR_114096.1	Bacillales_MS	10	Bacillales_drentensis;Bacillales_senegalensis;Bacillus_arbutinivorans;Bacillus_bataviensis;Bacillus_djibelorensis;Bacillus_drentensis;Bacillus_novalis;Bacillus_senegalensis;Bacillus_soli;Bacillus_vireti	nt|AF519465.1;nt|AF519467.1;nt|AJ542505.1;nt|AJ542507.1;nt|AJ542514.1;nt|JQ579624.1;nt|MG205535.1;nt|NR_042168.1;silva|AB681783.1.1411;silva|AB681791.1.1475;silva|AB681793.1.1454;silva|AB681794.1.1430;silva|AF519465.1.1419;silva|AF519467.1.1468;silva|AJ542512.1.1503;silva|AY466403.1.1389;silva|EF690434.1.1496;silva|JQ579624.1.1437	100.0/100.0	Bacteria	Firmicutes	Bacilli	Bacillales	Bacillaceae	Bacillus	Bacillus_MS	Aged_3_171207;Aged_1_92782	GGCTTAGATACCCTGGTAGTCCACGCCGTAAACGATGAGTGCTAAGTGTTAGGGGGTTTCCGCCCCTTAGTGCTGCAGCTAACGCATTAAGCACTCCGCCTGGGGAGTACGGCCGCAAGGCTGAAACTCAAAGGAATTGACGGGGGCCCGCACAAGCGGTGGAGCATGTGGTTTAATTCGAAGCAACGCGAAGAACCTTACCAGGTCTTGACATCCTCTGACACTCCTAGAGATAGGACGTTCCCCTTCGGGGGACAGAGTGACAGGTGGTGCATGGTTGTCGTCAGCTCGTGTCGTGAGATGTTGGGTTAAGTCCCGCAACGAGCGCAACCC	GGATTAGATACCCTGGTAGTCCACGCCGTAAACGATGAGTGCTAAGTGTTAGGGGGTTTCCGCCCCTTAGTGCTGCAGCTAACGCATTAAGCACTCCGCCTGGGGAGTACGGCCGCAAGGCTGAAACTCAAAGGAATTGACGGGGGCCCGCACAAGCGGTGGAGCATGTGGTTTAATTCGAAGCAACGCGAAGAACCTTACCAGGTCTTGACATCCTCTGACACTCCTAGAGATAGGACGTTCCCCTTCGGGGGACAGAGTGACAGGTGGTGCATGGTTGTCGTCAGCTCGTGTCGTGAGATGTTGGGTTAAGTCCCGCAACGAGCGCAACCC	0	0	0	0	0	0	0	0	0	0	0	0	0	0	0	1	1	0.25	33	36	41	20	130	32.5	30
Bacillus_MS_8	S	1	4	Aged_1_153048	100	100	N	Bacillus_drentensis;Bacillus_firmus;Bacillus_infantis;Bacillus_oceanisediminis	16SMicrobial|NR_025842.1;16SMicrobial|NR_043267.1;16SMicrobial|NR_117285.1;16SMicrobial|NR_118438.1	Bacteria_MS	16	Acinetobacter_rhizosphaerae;Bacillales_firmus;Bacillales_infantis;Bacillales_oceanisediminis;Bacillales_thuringiensis;Bacillus_cereus;Bacillus_drentensis;Bacillus_firmis;Bacillus_firmus;Bacillus_foraminis;Bacillus_hwajinpoensis;Bacillus_infantis;Bacillus_megaterium;Bacillus_oceanisediminis;Paenibacillus_mucilaginosus;Stenotrophomonas_maltophilia	nt|CP015506.1;nt|KP992901.1;nt|KR091843.1;nt|KT000267.1;nt|KY580794.1;nt|KY580802.1;nt|KY689040.1;nt|MF351825.1;nt|MG234284.1;nt|MG733542.1;nt|MG733584.1;silva|AJ491843.1.1516;silva|CP015506.103466.105020;silva|EU624421.1.1511;silva|JN559893.1.730;silva|KC734537.1.1494;silva|KC751070.1.1462;silva|KC843346.1.1386;silva|KJ000207.1.1301;silva|LT844644.1.1321	100.0/100.0	Bacteria	Firmicutes	Bacilli	Bacillales	Bacillaceae	Bacillus	Bacillus_MS	Aged_1_153048;Aged_4_175084;Aged_2_137831	GGATTAGATACCCTGGTAGTCCACGCCGTAAACGATGAGTGCTAAGTGTTAGAGGGTTTCCGCCCTTTAGTGCTGCAGCAAACGCATTAAGCACTCCGCCTGGGGAGTACGGCCGCAAGGCTGAAACTCAAAGGAATTGACGGGGGCCCGCACAAGCGGTGGAGCATGTGGTTTAATTCGAAGCAACGCGAAGAACCTTACCAGGTCTTGACATCTCCTGACAACCCTAGAGATAGGGCGTTCCCCTTCGGGGGACAGGATGACAGGTGGTGCATGGTTGTCGTCAGCTCGTGTCGTGAGATGTTGGGTTAAGTCCCGCAACGAGCGCAACCC	GGATTAGATACCCTGGTAGTCCACGCCGTAAACGATGAGTGCTAAGTGTTAGAGGGTTTCCGCCCTTTAGTGCTGCAGCAAACGCATTAAGCACTCCGCCTGGGGAGTACGGCCGCAAGGCTGAAACTCAAAGGAATTGACGGGGGCCCGCACAAGCGGTGGAGCATGTGGTTTAATTCGAAGCAACGCGAAGAACCTTACCAGGTCTTGACATCTCCTGACAACCCTAGAGATAGGGCGTTCCCCTTCGGGGGACAGGATGACAGGTGGTGCATGGTTGTCGTCAGCTCGTGTCGTGAGATGTTGGGTTAAGTCCCGCAACGAGCGCAACCC	0	0	0	0	0	0	1	0	2	3	6	1.5	4	2	1	5	12	3	14	23	20	7	64	16	4
Bacillus_MS_9	S	1	2	Aged_3_34029	100	100	N	Bacillus_clausii;Bacillus_rhizosphaerae	16SMicrobial|NR_026140.1;16SMicrobial|NR_108311.1	Bacteria_MS	5	Bacillales_clausii;Bacillales_rhizosphaerae;Bacillus_clausii;Bacillus_rhizosphaerae;Brevundimonas_diminuta	nt|AB111935.1;nt|KT595230.1;nt|MH061181.1;silva|AB111935.1.1420;silva|FJ233848.1.1433	100.0/100.0	Bacteria	Firmicutes	Bacilli	Bacillales	Bacillaceae	Bacillus	Bacillus_MS	Compost_3_8669;Aged_4_12064;Aged_3_34029;Aged_3_52383;Compost_1_132434;Compost_2_19997;Aged_1_69483;Aged_3_39219	GGATTAGATACCCTGGTAGTCCACGCCGTAAACGATGAGTGCTAGGTGTTAGGGGTTTCGATGCCCGTAGTGCCGAAGTTAACACATTAAGCACTCCGCCTGGGGAGTACGGCCGCAAGGCTGAAACTCAAAGGAATTGACGGGGACCCGCACAAGCAGTGGAGCATGTGGTTTAATTCGAAGCAACGCGAAGAACCTTACCAGGTCTTGACATCCTTTGACCACCCAAGAGATTGGGCTTCCCCTTCGGGGGCAAAGTGACAGGTGGTGCATGGTTGTCGTCAGCTCGTGTCGTGAGATGTTGGGTTAAGTCCCGCAACGAGCGCAACCC	GGATTAGATACCCTGGTAGTCCACGCCGTAAACGATGAGTGCTAGGTGTTAGGGGTTTCGATGCCCGTAGTGCCGAAGTTAACACATTAAGCACTCCGCCTGGGGAGTACGGCCGCAAGGCTGAAACTCAAAGGAATTGACGGGGACCCGCACAAGCAGTGGAGCATGTGGTTTAATTCGAAGCAACGCGAAGAACCTTACCAGGTCTTGACATCCTTTGACCACCCAAGAGATTGGGCTTCCCCTTCGGGGGCAAAGTGACAGGTGGTGCATGGTTGTCGTCAGCTCGTGTCGTGAGATGTTGGGTTAAGTCCCGCAACGAGCGCAACCC	0	0	0	0	0	0	4	0	5	4	13	3.25	19	15	5	17	56	14	9	12	8	21	50	12.5	5
Bacillus_panacisoli_1	S	1	0	Aged_2_139595	99.099	100	N	Bacillus_panacisoli	16SMicrobial|NR_133702.1	Bacillus_panacisoli	0	Bacillus_panacisoli	nt|NR_133702.1	99.099/100.0	Bacteria	Firmicutes	Bacilli	Bacillales	Bacillaceae	Bacillus	Bacillus_panacisoli	Aged_1_80919;Aged_2_46767;Aged_2_139595;Aged_1_138580;Aged_1_141171;Aged_4_155030;Aged_1_33951;Aged_1_134890	GGATTAGATACCCTGGTAGTCCACGCCGTAAACGATGAGTGCTAGGTGTTAGAGGGTTTCCGCCCTTTAGTGCTGCAGCTAACGCATTAAGCACTCCGCCTGGGGAGTACGGCCGCAAGGCTGAAACTCAAAGGAATTGACGGGGGCCCGCACAAGCGGTGGAGCATGTGGTTTAATTCGAAGCAACGCGAAGAACCTTACCAGGTCTTGACATCCCGCTGACCGGCCTAGAGATAGGTCTTTCCCTTCGGGGACAGCGGTGACAGGTGGTGCATGGTTGTCGTCAGCTCGTGTCGTGAGATGTTGGGTTAAGTCCCGCAACGAGCGCAACCC	GGATTAGATACCCTGGTAGTCCACGCCGTAAACGATGAGTGCTAAGTGTTAGAGGGTTTCCGCCCTTTAGTGCTGCAGCTAACGCATTAAGCACTCCGCCTGGGGAGTACGGCCGCAAGGCTGAAACTCAAAGGAATTGACGGGGGCCCGCACAAGCGGTGGAGCATGTGGTTTAATTCGAAGCAACGCGAAGAACCTTACCAGGTCTTGACATCCCGCTGACCGGCCTAGAGATAGGTCTTCCCCTTCGGGGGCAGCGGTGACAGGTGGTGCATGGTTGTCGTCAGCTCGTGTCGTGAGATGTTGGGTTAAGTCCCGCAACGAGCGCAACCC	0	0	0	0	0	0	0	0	0	0	0	0	0	0	0	0	0	0	33	62	60	94	249	62.25	4
Bacillus_panaciterrae_1	S	1	0	Aged_1_33445	99.396	100	N	Bacillus_panaciterrae	16SMicrobial|NR_041379.1	Bacillales_MS	4	Bacillales_mycoides;Bacillales_panaciterrae;Bacillus_mycoides;Bacillus_panaciterrae	nt|FJ527653.1;nt|JQ833951.1;silva|AB245380.1.1476;silva|JQ833951.1.608	99.396/100.0	Bacteria	Firmicutes	Bacilli	Bacillales	Bacillaceae	Bacillus	Bacillus_panaciterrae	Aged_2_35751;Aged_1_128996;Aged_1_106993;Aged_2_118430;Aged_1_112056;Aged_1_58205;Aged_1_33445;Compost_1_147880	GGCTTAGATACCCTGGTAGTCCACGCCGTAAACGATGAGTGCTAAGTGTTAGAGGGTTTCCGCCCTTTAGTGCTGAAGTTAACGCATTAAGCACTCCGCCTGGGGAGTACGGCCGCAAGGCTGAAACTCAAAGGAATTGACGGGGACCCGCACAAGCGGTGGAGCATGTGGTTTAATTCGAAGCAACGCGAAGAACCTTACCAGGTCTTGACATCCTCTGACCACCCTAGAGATAGGGCTTTCCCTTCGGGGACAGAGTGACAGGTGGTGCATGGTTGTCGTCAGCTCGTGTCGTGAGATGTTGGGTTAAGTCCCGCAACGAGCGCAACCC	GGATTAGATACCCTGGTAGTCCACGCCGTAAACGATGAGTGCTAAGTGTTAGAGGGTTTCCGCCCTTTAGTGCTGAAGTTAACGCATTAAGCACTCCGCCTGGGGAGTACGGCCGCAAGGCTGAAACTCAAAGGAATTGACGGGGGCCCGCACAAGCGGTGGAGCATGTGGTTTAATTCGAAGCAACGCGAAGAACCTTACCAGGTCTTGACATCCTCTGACAACCCTAGAGATAGGGCTTTCCCTTCGGGGACAGAGTGACAGGTGGTGCATGGTTGTCGTCAGCTCGTGTCGTGAGATGTTGGGTTAAGTCCCGCAACGAGCGCAACCC	0	0	0	0	0	0	0	0	0	0	0	0	0	2	0	2	4	1	13	18	23	20	74	18.5	5
Bacillus_psychrosaccharolyticus_1	S	1	0	Aged_1_10359	100	100	N	Bacillus_psychrosaccharolyticus	16SMicrobial|NR_040793.1	Bacillales_MS	24	Bacillales_arbutinivorans;Bacillales_bataviensis;Bacillales_deserti;Bacillales_drentensis;Bacillales_massiliglaciei;Bacillales_mesonae;Bacillales_niacini;Bacillales_soli;Bacillales_vireti;Bacillus_arbutinivorans;Bacillus_bataviensis;Bacillus_cucumis;Bacillus_deserti;Bacillus_drentensis;Bacillus_huizhouensis;Bacillus_massiliglaciei;Bacillus_mesonae;Bacillus_niacini;Bacillus_pocheonensis;Bacillus_p…	nt|AB862134.1;nt|AB889607.1;nt|CP022572.1;nt|EU221347.1;nt|EU221371.1;nt|EU867384.1;nt|FJ009380.1;nt|HQ326995.1;nt|KC921179.1;nt|KT720271.1;nt|KU936342.1;silva|AB021195.1.1507;silva|AB889607.1.1225;silva|EU221347.1.1478;silva|EU221371.1.1516;silva|EU221374.1.1454;silva|EU867384.1.1388;silva|FJ009380.1.1404;silva|FMSO01000002.66502.68031;silva|JQ830014.1.786;silva|JQ830467.1.726;silva|JQ831152.1.5…	100.0/100.0	Bacteria	Firmicutes	Bacilli	Bacillales	Bacillaceae	Bacillus	Bacillus_psychrosaccharolyticus	Aged_1_128065;Aged_1_10359;Aged_1_108704;Aged_1_147894;Aged_1_92279	GGATTAGATACCCTGGTAGTCCACGCCGTAAACGATGAGTGCTAAGTGTTAGAGGGTTTCCGCCCTTTAGTGCTGCAGCTAACGCATTAAGCACTCCGCCTGGGGAGTACGGCCGCAAGGCTGAAACTCAAAGGAATTGACGGGGGCCCGCACAAGCGGTGGAGCATGTGGTTTAATTCGAAGCAACGCGAAGAACCTTACCAGGTCTTGACATCCTCTGACACTCCTAGAGATAGGACGTTCCCCTTCGGGGGACAGAGTGACAGGTGGTGCATGGTTGTCGTCAGCTCGTGTCGTGAGATGTTGGGTTAAGTCCCGCAACGAGCGCAACCC	GGATTAGATACCCTGGTAGTCCACGCCGTAAACGATGAGTGCTAAGTGTTAGAGGGTTTCCGCCCTTTAGTGCTGCAGCTAACGCATTAAGCACTCCGCCTGGGGAGTACGGCCGCAAGGCTGAAACTCAAAGGAATTGACGGGGGCCCGCACAAGCGGTGGAGCATGTGGTTTAATTCGAAGCAACGCGAAGAACCTTACCAGGTCTTGACATCCTCTGACACTCCTAGAGATAGGACGTTCCCCTTCGGGGGACAGAGTGACAGGTGGTGCATGGTTGTCGTCAGCTCGTGTCGTGAGATGTTGGGTTAAGTCCCGCAACGAGCGCAACCC	0	0	0	0	0	0	6	0	5	2	13	3.25	5	16	22	11	54	13.5	26	27	20	61	134	33.5	16
Bacillus_smithii_1	S	2	0	Aged_1_140288	100	100	N	Bacillus_smithii	16SMicrobial|NR_112634.1	Bacillus_smithii	0	Bacillus_smithii	nt|AY373319.1;silva|AB271749.1.1480	100.0/100.0;99.7/100.0	Bacteria	Firmicutes	Bacilli	Bacillales	Bacillaceae	Bacillus	Bacillus_smithii	Aged_1_129268;Aged_3_11769;Aged_1_140288;Aged_1_1211;Aged_1_157899;Compost_1_111309;Aged_1_73255;Aged_2_106503	GGATTAGATACCCTGGTAGTCCACGCCGTAAACGATGAGTGCTAAGTGTTAGAGGGCTTCCACCCTTTAGTGCTGCAGCTAACGCATTAAGCACTCCGCCTGGGGAGTACGGCCGCAAGGCTGAAACTCAAAGGAATTGACGGGGGCCCGCACAAGCGGTGGAGCATGTGGTTTAATTCGAAGCAACGCGAAGAACCTTACCAGGTCTTGACATCCTTCGCTACCTCTAGAGATAGAGGGTTCCCCTTCGGGGGACGGAGTGACAGGTGGTGCATGGTTGTCGTCAGCTCGTGTCGTGAGATGTTGGGTTAAGTCCCGCAACGAGCGCAACCC	GGATTAGATACCCTGGTAGTCCACGCCGTAAACGATGAGTGCTAAGTGTTAGAGGGCTTCCACCCTTTAGTGCTGCAGCTAACGCATTAAGCACTCCGCCTGGGGAGTACGGCCGCAAGGCTGAAACTCAAAGGAATTGACGGGGGCCCGCACAAGCGGTGGAGCATGTGGTTTAATTCGAAGCAACGCGAAGAACCTTACCAGGTCTTGACATCCTTCGCTACCTCTAGAGATAGAGGGTTCCCCTTCGGGGGACGGAGTGACAGGTGGTGCATGGTTGTCGTCAGCTCGTGTCGTGAGATGTTGGGTTAAGTCCCGCAACGAGCGCAACCC	1	0	0	0	1	0.25	69	12	23	52	156	39	332	271	303	295	1201	300.25	389	273	286	459	1407	351.75	189
Bacillus_thermotolerans_1	S	2	0	Aged_2_98363	100	100	N	Bacillus_thermotolerans	16SMicrobial|NR_118456.1	Bacillales_MS	4	Bacillales_subtilis;Bacillales_thermotolerans;Bacillus_subtilis;Bacillus_thermotolerans	nt|AB211021.1;nt|EF112395.1;silva|AB211021.1.1507;silva|JWJE02000010.104119.105652	100.0/100.0;99.7/100.0	Bacteria	Firmicutes	Bacilli	Bacillales	Bacillaceae	Bacillus	Bacillus_thermotolerans	Aged_1_30154;Aged_3_101619;Aged_2_98363;Aged_1_126536;Aged_2_99800;Aged_4_14280;Aged_1_98499;Aged_1_23997	GGATTAGATACCCTGGTAGTCCACGCCGTAAACGATGAGTGCTAAGTGTTGGAGGGTTTCCGCCCTTCAGTGCTGCAGCTAACGCATTAAGCACTCCGCCTGGGGAGTACGGCCGCAAGGCTGAAACTCAAAGGAATTGACGGGGGCCCGCACAAGCGGTGGAGCATGTGGTTTAATTCGAAGCAACGCGAAGAACCTTACCAGGTCTTGACATCCTCTGACACCTCTGGAGACAGAGCGTTCCCCTTCGGGGGACAGAGTGACAGGTGGTGCATGGTTGTCGTCAGCTCGTGTCGTGAGATGTTGGGTTAAGTCCCGCAACGAGCGCAACCC	GGATTAGATACCCTGGTAGTCCACGCCGTAAACGATGAGTGCTAAGTGTTGGAGGGTTTCCGCCCTTCAGTGCTGCAGCTAACGCATTAAGCACTCCGCCTGGGGAGTACGGCCGCAAGGCTGAAACTCAAAGGAATTGACGGGGGCCCGCACAAGCGGTGGAGCATGTGGTTTAATTCGAAGCAACGCGAAGAACCTTACCAGGTCTTGACATCCTCTGACACCTCTGGAGACAGAGCGTTCCCCTTCGGGGGACAGAGTGACAGGTGGTGCATGGTTGTCGTCAGCTCGTGTCGTGAGATGTTGGGTTAAGTCCCGCAACGAGCGCAACCC	0	0	0	0	0	0	0	0	0	0	0	0	0	0	0	0	0	0	17	2	1	11	31	7.75	7
Bacillus_trypoxylicola_1	S	1	0	Aged_2_51966	99.7	100	N	Bacillus_trypoxylicola	16SMicrobial|NR_114174.1	Bacillus_trypoxylicola	0	Bacillus_trypoxylicola	nt|KU179442.1	99.7/100.0	Bacteria	Firmicutes	Bacilli	Bacillales	Bacillaceae	Bacillus	Bacillus_trypoxylicola	Aged_1_75536;Aged_2_51966;Aged_3_8557	GGATTAGATACCCTGGTAGTCCACGCCGTAAACGATGAGTGCTAGGTGTTAGGGGTTTCGATGCCCTTAGTGCCGAAGTAAACACATTAAGCACTCCGCCTGGGGAGTACGGCCGCAAGGCTGAAACTCAAAGGAATTGACGGGGGCCCGCACAAGCAGTGGAGCATGTGGTTTAATTCGAAGCAACGCGAAGAACCTTACCAGGTCTTGACATCCTTTGACCACCCTAGAGATAGGGCTTTCCCCTTCGGGGGACAAAGTGACAGGTGGTGCATGGTTGTCGTCAGCTCGTGTCGTGAGATGTTGGGTTAAGTCCCGCAACGAGCGCGACCC	GGATTAGATACCCTGGTAGTCCACGCCGTAAACGATGAGTGCTAGGTGTTAGGGGTTTCGATGCCCTTAGTGCCGAAGTTAACACATTAAGCACTCCGCCTGGGGAGTACGGCCGCAAGGCTGAAACTCAAAGGAATTGACGGGGGCCCGCACAAGCAGTGGAGCATGTGGTTTAATTCGAAGCAACGCGAAGAACCTTACCAGGTCTTGACATCCTTTGACCACCCTAGAGATAGGGCTTTCCCCTTCGGGGGACAAAGTGACAGGTGGTGCATGGTTGTCGTCAGCTCGTGTCGTGAGATGTTGGGTTAAGTCCCGCAACGAGCGCAACCC	571	571	431	473	2046	511.5	8	2	0	1	11	2.75	1	0	0	2	3	0.75	7	3	0	2	12	3	0
Bacteria_1	D	1	0	Aged_1_24697	100	100	N	Bacteria	rdp|S004044971;silva|KC854998.1.1470	-	-	-	-	-	Bacteria	Bacteria	Bacteria	Bacteria	Bacteria	Bacteria	Bacteria	Aged_1_24697	GGATTAGATACCCCGGTAGTCCTGGCCGTAAACGTTGGATACTAGGTGTGGGGGGTATCGACCCCCTCCGTGCCGCAGCTAACGCATTAAGTATCCCGCCTGGGGAGTACGGCCGCAAGGTTGAAACTCAAAGGAATTGACGGGGGCCCGCACAAGCGGTGGAGCATGTGGTTCAATTCGACGCAACGCGAAGAACCTTACCCAGGCTCGAAATGCTATGGACCGCCGTGGAAACACGGTTTCTTCCCTTCGGGGAAGTCGTAGTATAGGTGCTGCATGGCTGTCGTCAGCTCGTGTCGTGAGATGTTGGGTTAAGTCCCGCAACGAGCGCGACCC	GGATTAGATACCCCGGTAGTCCTGGCCGTAAACGTTGGATACTAGGTGTGGGGGGTATCGACCCCCTCCGTGCCGCAGCTAACGCATTAAGTATCCCGCCTGGGGAGTACGGCCGCAAGGTTGAAACTCAAAGGAATTGACGGGGGCCCGCACAAGCGGTGGAGCATGTGGTTCAATTCGACGCAACGCGAAGAACCTTACCCAGGCTCGAAATGCTATGGACCGCCGTGGAAACACGGTTTCTTCCCTTCGGGGAAGTCGTAGTATAGGTGCTGCATGGCTGTCGTCAGCTCGTGTCGTGAGATGTTGGGTTAAGTCCCGCAACGAGCGCAACCC	0	0	0	0	0	0	0	0	1	8	9	2.25	3	2	21	7	33	8.25	63	58	29	26	176	44	0
Bacteria_MG_16	G	1	2	Aged_1_137161	99.392	100	N	Acidobacterium;Bacillus	nt|GU271795.1;nt|JQ825225.1	-	-	-	-	-	Bacteria	Bacteria_MG	Bacteria_MG	Bacteria_MG	Bacteria_MG	Bacteria_MG	Bacteria_MG	Aged_2_104256;Aged_1_127410;Aged_1_137161;Aged_1_158046;Aged_1_60125;Aged_1_146324;Aged_1_14176;Aged_1_129767	GGATTAGATACCCCGGTAGTCCTGGCCCTAAACGATGAATGCTTGGTGTGACGGGTATCGATCCCTGTCGTGCCGAAGCTAACGCATTAAGCATTCCGCCTGGGGAGTACGGTCGCAAGGCTGAAACTCAAAGGAATTGACGGGGGCCCGCACAAGCGGTGGAGCATGTGGTTCAATTCGACGCAACGCGAAGAACCTTACCCAGGCTCGAACGGCAATTGACATCCGGCGAAAGTCGGCTCCCGCAAGGGCAGTTGTCGAGGTGCTGCATGGCTGTCGTCAGCTCGTGTCGTGAGATGTTGGGTTAAGTCCCGCAACGAGCGCAACCC	GGATTAGATACCCCGGTAGTCCTGGCCCTAAACGATGAATGCTTGGTGTGACGGGTATCGATCCCTGTCGTGCCGAAGCTAACGCATTAAGCATTCCGCCTGGGGAGTACGGTCGCAAGGCTGAAACTCAAAGGAATTGACGGGGGCCCGCACAAGCGGTGGAGCATGTGGTTCAATTCGACGCAACGCGAAGAACCTTACCCAGGCTCGAACGGCAACTGACATCCGGCGAAAGCCGGCTCCCGCAAGGGCAGTTGTCGAGGTGCTGCATGGCTGTCGTCAGCTCGTGTCGTGAGATGTTGGGTTAAGTCCCGCAACGAGCGCAACCC	0	0	0	0	0	0	0	0	0	0	0	0	2	0	2	2	6	1.5	31	11	9	17	68	17	10
Bacteria_MG_18	G	1	2	Aged_1_116086	100	100	N	Gemmatimonas;Methylibium	nt|HE974816.1;rdp|S000405949;rdp|S000978238	-	-	-	-	-	Bacteria	Bacteria_MG	Bacteria_MG	Bacteria_MG	Bacteria_MG	Bacteria_MG	Bacteria_MG	Aged_1_144280;Aged_1_100672;Aged_1_116086;Aged_1_105523;Aged_1_43464;Aged_4_101795;Aged_1_100039;Aged_1_54330	GGATTAGATACCCTGGTAGTCCACGCCGTAAACGATGGGCACTAGGCGTCGGGGGGAGCGACCCTCCCGGTGCCGTCGCTAACGCAGTAAGTGCCCCGCCTGGGGAGTACGGCCGCAAGGCTGAAACTCAAAGGAATTGACGGGGGCCCGCACAAGCGGTGGAGCATGTGGTTTAATTCGAAGCAACGCGAAGAACCTTACCTGGGCTTGACATGCACGGGAAAGCCGGTGGAAACATCGGCCCCTCTTCGGAGTCCGTGCACAGGTGCTGCATGGCTGTCGTCAGCTCGTGTCGTGAGATGTTGGGTTAAGTCCCGCAACGAGCGCAACCC	GGATTAGATACCCTGGTAGTCCACGCCGTAAACGATGGGCACTAGGCGTCGGGGGGAGCGACCCTCCCGGTGCCGTCGCTAACGCAGTAAGTGCCCCGCCTGGGGAGTACGGCCGCAAGGCTGAAACTCAAAGGAATTGACGGGGGCCCGCACAAGCGGTGGAGCATGTGGTTTAATTCGAAGCAACGCGAAGAACCTTACCTGGGCTTGACATGCACGGGAAAGCCGGTGGAAACATCGGCCCCTCTTCGGAGTCCGTGCACAGGTGCTGCATGGCTGTCGTCAGCTCGTGTCGTGAGATGTTGGGTTAAGTCCCGCAACGAGCGCAACCC	0	0	0	0	0	0	87	28	127	108	350	87.5	184	110	141	50	485	121.25	48	49	84	98	279	69.75	51
Bacteria_MG_24	G	1	3	Aged_1_8348	99.399	100	N	Gaiella;Pseudolabrys;Rhodoplanes	nt|JX504966.1;rdp|S001161179;rdp|S004437692	-	-	-	-	-	Bacteria	Bacteria_MG	Bacteria_MG	Bacteria_MG	Bacteria_MG	Bacteria_MG	Bacteria_MG	Aged_1_8348;Compost_1_43087;Compost_1_183377;Compost_1_130985	GGATTAGATACCCTGGTAGTCCACGCCGTAAACGATGGATGCTAGCCGTTGGCGAGCTTGCTCGTCAGTGGCGCAGCTAACGCATTAAGCATCCCGCCTGGGGAGTACGGTCGCAAGATTAAAACTCAAAGGAATTGACGGGGGCCCGCACAAGCGGTGGAGCATGTGGTTCAATTCGACGCAACGCGAAGAACCTTACCAGCCCTTGACATCCCGGTCGCGGAGAGCAGAGACGCACTCCTTCAGTTCGGCTGGACCGGAGACAGGTGCTGCATGGCTGTCGTCAGCTCGTGTCGTGAGATGTTGGGTTAAGTCCCGCAACGAGCGCAACCC	GGATTAGATACCCTGGTAGTCCACGCCGTAAACGATGGATGCTAGCCGTTGGCGAGCTTGCTCGTCAGTGGCGCAGCTAACGCTTTAAGCATCCCGCCTGGGGAGTACGGTCGCAAGATTAAAACTCAAAGGAATTGACGGGGGCCCGCACAAGCGGTGGAGCATGTGGTTCAATTCGAAGCAACGCGAAGAACCTTACCAGCCCTTGACATCCCGGTCGCGGAGAGCAGAGACGCACTCCTTCAGTTCGGCTGGACCGGAGACAGGTGCTGCATGGCTGTCGTCAGCTCGTGTCGTGAGATGTTGGGTTAAGTCCCGCAACGAGCGCAACCC	0	0	0	0	0	0	0	0	0	0	0	0	0	0	0	0	0	0	24	5	14	36	79	19.75	34
Bacteria_MG_25	G	1	3	Compost_1_120050	100	100	N	Blastomonas;Ferruginibacter;Pseudolabrys	nt|KF441582.1;nt|MK204354.1;rdp|S000892835;rdp|S004201984;silva|AB269561.1.729;silva|KJ707416.1.1183	-	-	-	-	-	Bacteria	Bacteria_MG	Bacteria_MG	Bacteria_MG	Bacteria_MG	Bacteria_MG	Bacteria_MG	Compost_1_120050;Aged_1_148426	GGATTAGATACCCTGGTAGTCCACGCCGTAAACGATGAATGCTAGCCGTTGGCGAGCTTGCTCGTCAGTGGCGCAGCTAACGCTTTAAGCATTCCGCCTGGGGAGTACGGTCGCAAGATTAAAACTCAAAGGAATTGACGGGGGCCCGCACAAGCGGTGGAGCATGTGGTTTAATTCGAAGCAACGCGCAGAACCTTACCAGCTCTTGACATGTCCCGTATGGGTTTCAGAGATGAGACCCTTCAGTTCGGCTGGCGGGAACACAGGTGCTGCATGGCTGTCGTCAGCTCGTGTCGTGAGATGTTGGGTTAAGTCCCGCAACGAGCGCAACCC	GGATTAGATACCCTGGTAGTCCACGCCGTAAACGATGAATGCTAGCCGTTGGCGAGCTTGCTCGTCAGTGGCGCAGCTAACGCTTTAAGCATTCCGCCTGGGGAGTACGGTCGCAAGATTAAAACTCAAAGGAATTGACGGGGGCCCGCACAAGCGGTGGAGCATGTGGTTTAATTCGAAGCAACGCGCAGAACCTTACCAGCTCTTGACATGTCCCGTATGGGTTTCAGAGATGAGACCCTTCAGTTCGGCTGGCGGGAACACAGGTGCTGCATGGCTGTCGTCAGCTCGTGTCGTGAGATGTTGGGTTAAGTCCCGCAACGAGCGCAACCC	0	0	0	0	0	0	2	0	0	0	2	0.5	1	1	2	2	6	1.5	6	4	3	2	15	3.75	6
Bacteria_MG_38	G	1	2	Compost_1_101117	100	100	N	Gemmatimonas;Pelagibacter	rdp|S000690165;rdp|S001137341	-	-	-	-	-	Bacteria	Bacteria_MG	Bacteria_MG	Bacteria_MG	Bacteria_MG	Bacteria_MG	Bacteria_MG	Compost_1_123963;Compost_1_101117;Compost_1_19109	GGATTAGATACCCTGGTAGTCCACGCCGTAAACGATGGGTACTAGGTGTCTGGGGGAGCGACCCCCTGGGTGCCGGCGCTAACGCATGAAGTACCCCGCCTGGGGAGTACGGCCGCAAGGCTGAAACTCAAAGGAATTGACGGGGGCCCGCACAAGCGGTGGAGCATGTGGTTTAATTCGACGCAACGCGAAGAACCTTACCTAGGCTTGACATGCTGGAGAAAGCTTGCGGAAACGTGAGCCCCTCTTCGGAGTTCCAGCACAGATGCTGCATGGCTGTCGTCAGCTCGTGTCGTGAGATGTTGGGTTAAGTCCCGCAACGAGCGCGACCC	GGATTAGATACCCTGGTAGTCCACGCCGTAAACGATGGGTACTAGGTGTCTGGGGGAGCGACCCCCTGGGTGCCGGCGCTAACGCATGAAGTACCCCGCCTGGGGAGTACGGCCGCAAGGCTGAAACTCAAAGGAATTGACGGGGGCCCGCACAAGCGGTGGAGCATGTGGTTTAATTCGACGCAACGCGAAGAACCTTACCTAGGCTTGACATGCTGGAGAAAGCTTGCGGAAACGTGAGCCCCTCTTCGGAGTTCCAGCACAGATGCTGCATGGCTGTCGTCAGCTCGTGTCGTGAGATGTTGGGTTAAGTCCCGCAACGAGCGCAACCC	0	0	0	0	0	0	0	0	0	0	0	0	0	0	0	1	1	0.25	37	2	2	3	44	11	3
Bacteria_MG_39	G	2	2	Aged_1_24345	100	100	N	Gaiella;Haliangium	rdp|S000933178;silva|EU134462.1.1376	-	-	-	-	-	Bacteria	Bacteria_MG	Bacteria_MG	Bacteria_MG	Bacteria_MG	Bacteria_MG	Bacteria_MG	Aged_1_24345	GGATTAGATACCCTGGTAGTCCACGCTGTAAACGATGGGCACTAGGTGTCCGGGGTATTGACCCCCTGGGTGCCGCAGCTAACGCATTAAGTGCCCCGCCTGGGGAGTACGGTCGCAAGATTAAAACTCAAAGGAATTGACGGGGGCCCGCACAAGCGGTGGAGCATGTGGTTCAATTCGACGCAACGCGAAGAACCTTACCTGGGCTAGACAACGGCGGACCGTCCTAGAAATAGGACTTTCCCTTCGGGGACTGCCGGTTCAGGTGCTGCATGGCTGTCGTCAGCTCGTGCCGTGAGGTGTTGGGTTAAGTCCCGCAACGAGCGCAACCC	GGATTAGATACCCTGGTAGTCCACGCTGTAAACGATGGGCACTAGGTGTCCGGGGTATTGACCCCCTGGGTGCCGCAGCTAACGCATTAAGTGCCCCGCCTGGGGAGTACGGTCGCAAGATTAAAACTCAAAGGAATTGACGGGGGCCCGCACAAGCGGTGGAGCATGTGGTTCAATTCGACGCAACGCGAAGAACCTTACCTGGGCTAGACAACGGCGGACCGTCCTAGAAATAGGACTTTCCCTTCGGGGACTGCCGGTTCAGGTGCTGCATGGCTGTCGTCAGCTCGTGCCGTGAGGTGTTGGGTTAAGTCCCGCAACGAGCGCAACCC	1	0	0	0	1	0.25	20	6	11	43	80	20	92	49	62	64	267	66.75	47	40	35	18	140	35	9
Bacteria_MG_40	G	1	2	Aged_1_136565	100	100	N	Gaiella;Pseudolabrys	rdp|S001234762;rdp|S004419593	-	-	-	-	-	Bacteria	Bacteria_MG	Bacteria_MG	Bacteria_MG	Bacteria_MG	Bacteria_MG	Bacteria_MG	Aged_1_128010;Aged_4_135566;Aged_1_136565;Aged_1_10845;Aged_1_102068;Compost_1_121899;Aged_1_128937;Aged_1_116457	GGATTAGATACCCTGGTAGTCCACGCCGTAAACGATGGATGCTAGCCGTTGGCAGGCTTGCCTGTCAGTGGCGCAGCTAACGCATTAAGCATCCCGCCTGGGGAGTACGGTCGCAAGATTAAAACTCAAAGGAATTGACGGGGGCCCGCACAAGCGGTGGAGCATGTGGTTCAATTCGAAGCAACGCGCAGAACCTTACCAACCTTTGACATCCCGATCGCGGGCACCAGAGATGGAGCCTTTCAGTTCGGCTGGATCGGAGACAGGTGCTGCATGGCTGTCGTCAGCTCGTGTCGTGAGATGTTGGGTTAAGTCCCGCAACGAGCGCAACCC	GGATTAGATACCCTGGTAGTCCACGCCGTAAACGATGGATGCTAGCCGTTGGCAGGCTTGCCTGTCAGTGGCGCAGCTAACGCATTAAGCATCCCGCCTGGGGAGTACGGTCGCAAGATTAAAACTCAAAGGAATTGACGGGGGCCCGCACAAGCGGTGGAGCATGTGGTTCAATTCGAAGCAACGCGCAGAACCTTACCAACCTTTGACATCCCGATCGCGGGCACCAGAGATGGAGCCTTTCAGTTCGGCTGGATCGGAGACAGGTGCTGCATGGCTGTCGTCAGCTCGTGTCGTGAGATGTTGGGTTAAGTCCCGCAACGAGCGCGACCC	0	0	0	0	0	0	0	0	0	0	0	0	0	1	1	3	5	1.25	5	16	36	92	149	37.25	32
Bacteria_MG_6	G	2	3	Aged_1_104392	99.698	100	N	Bryobacter;Hyphomicrobium;Solibacter	nt|AY499905.1;rdp|S000411272;rdp|S004439251;silva|EF019856.1.1332;silva|KJ015670.1.973	-	-	-	-	-	Bacteria	Bacteria_MG	Bacteria_MG	Bacteria_MG	Bacteria_MG	Bacteria_MG	Bacteria_MG	Aged_3_37887;Aged_1_104392;Aged_3_173110;Aged_3_4574;Aged_1_131101	GGATTAGATACCCTGGTAGTCCACGCCGTAAACGATGGATGCTAGCCGTCGGCAAGCTTGCTTGTCGGTGGCGCAGCTAACGCATTAAGCATCCCGCCTGGGGAGTACGGCCGCAAGGTTAAAACTCAAAGGAATTGACGGGGGCCCGCACAAGCGGTGGAGCATGTGGTTTAATTCGACGCAACGCGAAGAACCTTACCAGCTCTTGACATGTCCGGACGGTTTCCAGAGATGGATTCCTCCCAGCAATGGGCCGGAACACAGGTGCTGCATGGCTGTCGTCAGCTCGTGTCGTGAGATGTTGGGTTAAGTCCCGCAACGAGCGCAACCC	GGATTAGATACCCTGGTAGTCCACGCCGTAAACGATGGATGCTAGCCGTCGGCAAGCTTGCTTGTCGGTGGCGCAGCTAACGCATTAAGCATCCCGCCTGGGGAGTACGGCCGCAAGGTTAAAACTCAAAGGAATTGACGGGGGCCCGCACAAGCGGTGGAGCATGTGGTTTAATTCGACGCAACGCGAAGAACCTTACCAGCTCTTGACATGTCCGGACGGTTTCCAGAGATGGATTCCTCCCAGCAATGGGTCGGAACACAGGTGCTGCATGGCTGTCGTCAGCTCGTGTCGTGAGATGTTGGGTTAAGTCCCGCAACGAGCGCAACCC	0	0	0	0	0	0	3	0	0	0	3	0.75	0	0	0	1	1	0.25	68	104	186	163	521	130.25	67
Bacteria_MP_11	P	1	2	Aged_1_11329	99.398	100	N	Chloroflexi;Unknown_bacteria	nt|EU633731.1;rdp|S001086234;silva|EU633731.1.796	-	-	-	-	-	Bacteria	Bacteria_MP	Bacteria_MP	Bacteria_MP	Bacteria_MP	Bacteria_MP	Bacteria_MP	Aged_1_11329;Aged_1_112022	GGATTAGATACCCGGGTAGTCCACGCCGTAAACGATGAGTACTAGGTGTAGGGGGTATCGACCCCCTCTGTGCCGAAGCCAACGCGATAAGTACTCCGCCTGGGGACTACGGCCGCAAGGCTAAAACTCAAAGGAATTGACGGGGGCCCGCACAAGCAGCGGAGCGTGTGGTTTAATTCGATGATACGCGAAGAACCTCACCCAGGCTTGACATGCACGTGGTACTGAGGTGAAAGCCAAGGGACCCTTCGGGGAGCGTGCACAGGTGTTGCACGGCCGTCGTCAGCTCGTGCCGTGAGGTGTTGGGTTAAGTCCCGCAACGAGCGCAACCC	GGATTAGATACCCGGGTAGTCCACGCCGTAAACGATGAGTACTAGGTGTAGGGGGTATCGACCCCCTCTGTGCCGAAGCCAACGCGATAAGTACTCCGCCTGGGGACTACGGCCGCAAGGCTAAAACTCAAAGGAATTGACGGGGGCCCGCACAAGCAGCGGAGCGTGTGGTTTAATTCGATGATACGCGAAGAACCTCACCCAGGCTTGACATGCACGTGGTACTGAGGTGAAAGCCGAGGGACCCTTCGGGGAGCGTGCACAGGTGTTGCACGGCCGTCGTCAACTCGTGCCGTGAGGTGTTGGGTTAAGTCCCGCAACGAGCGCAACCC	0	0	0	0	0	0	0	0	0	0	0	0	0	1	0	0	1	0.25	22	16	18	16	72	18	21
Bacteria_MP_12	P	1	2	Middle_1_151033	99.096	100	Y	Gemmatimonadetes;Unknown_bacteria	nt|FJ152652.1;silva|FJ152652.1.1516	-	-	-	-	-	Bacteria	Bacteria_MP	Bacteria_MP	Bacteria_MP	Bacteria_MP	Bacteria_MP	Bacteria_MP	Middle_1_151033;Aged_2_109144	GGATTAGATACCCTGGTAGTCCACGCCGTAAACGATGGGTGCTAGATGCCGGGGGGAGCGACCCCTTCGGTGTCGTAGCTAACGCGTTAAGCACCCCGCCTGGGGAGTACGGCCGCAAGGCTGAAACTCAAAGGAATTGACGGGGGCCCGCACAAGCGGTGGAGCATGTGGTTTAATTCGAAGCAACGCGAAGAACCTTACCTGGGCTTGACATCCTGGTGAAAGCCCTTGGAAACAGGGGCCCTCCTTCGGGACACCAGGACAGGTGCTGCATGGCTGTCGTCAGCTCGTGTCGTGAGATGTTGGGTTAAGTCCCGCAACGAGCGCAACCC	GGATTAGATACCCTGGTAGTCCACGCCGTAAACGATGGGTGCTAGGTGCCGGGGGGAGCGACCCCTTCGGTGTCGGAGCTAACGCGTTAAGCACCCCGCCTGGGGAGTACGGCCGCAAGGCTGAAACTCAAAGGAATTGACGGGGGCCCGCACAAGCGGTGGAGCATGTGGTTTAATTCGAAGCAACGCGAAGAACCTTACCTGGGCTTGACATCCTGGTGAAAGCCCCTGGAAACAGGGGCCCTCCTTCGGGACACCAGGACAGGTGCTGCATGGCTGTCGTCAGCTCGTGTCGTGAGATGTTGGGTTAAGTCCCGCAACGAGCGCAACCC	0	0	0	0	0	0	0	0	0	0	0	0	0	0	0	0	0	0	11	0	7	1	19	4.75	2
Bacteria_MP_13	P	1	2	Aged_1_144595	99.398	100	N	Gemmatimonadetes;Unknown_bacteria	nt|FJ351932.1;silva|FJ351932.1.861	-	-	-	-	-	Bacteria	Bacteria_MP	Bacteria_MP	Bacteria_MP	Bacteria_MP	Bacteria_MP	Bacteria_MP	Aged_1_144595;Aged_1_46984	GGATTAGATACCCTGGTAGTCCACGCCGTAAACGATGGGCACTAGGTGCCGGGTCTCTAGACGGATTCGGTGCCGCAGTTAACGCATTAAGTGCCCCGCCTGGGGAGTACGGTCGCAAGGCTGAAACTCAAAGGAATTGACGGGGGCCCGCACAAGCGGTGGAGCATGTGGTTTAATTCGAAGCAACGCGAAGAACCTTACCCAGGCTTGACATCTTGGTGAAACCTCCTGGAAACAGGAGGCCTCCTTCGGGACACCATGACAGGTGCTGCATGGCTGTCGTCAGCTCGTGTCGTGAGATGTTGGGTTAAGTCCCGCAACGAGCGCAACCC	GGATTAGATACCCTGGTAGTCCACGCCGTAAACGATGGGCACTAGGTGCCGGGTCTCTAGACGGATTCGGTGCCGCAGTTAACGCATTAAGTGCCCCGCCTGGGGAGTACGGTCGCAAGGCTGAAACTCAAAGGAATTGACGGGGGCCCGCACAAGCGGTGGAGCATGTGGTTTAATTCGAAGCAACGCGAAGAACCTTACCCAGGCTTGACATCATGGTGAAACCTCCTGGAAACAGGAGGCCTCCTTCGGGACGCCATGACAGGTGCTGCATGGCTGTCGTCAGCTCGTGTCGTGAGATGTTGGGTTAAGTCCCGCAACGAGCGCAACCC	1	0	0	0	1	0.25	59	7	35	87	188	47	116	109	132	64	421	105.25	16	20	21	23	80	20	12
Bacteria_MP_14	P	1	2	Aged_1_146217	99.394	100	N	Chloroflexi;Unknown_bacteria	nt|GQ425447.1;silva|GQ425447.1.993	-	-	-	-	-	Bacteria	Bacteria_MP	Bacteria_MP	Bacteria_MP	Bacteria_MP	Bacteria_MP	Bacteria_MP	Aged_1_146217;Aged_1_121835;Aged_1_62797;Aged_1_129714	GGATTAGATACCCGGGTAGTCCACGCCGTAAACGATGAGTACTAGTTGTCGGGGGTATCGACCCCCTCGGTAACGAAGCTAACGCGATAAGTACTCCGCCTGGGGACTACGGCCGCAAGGCTAAAACTCAAAGGAATTGACGGGGGCCCGCACAAGCAGCGGAGCGTGCGGTTTAATTCGAAGCGACGCGAAGAACCTTACCAGGGCTTGACATGGCGGTGACAGCCGGCGAAAGTCGGTCTCCCTTCGGGGCACCGTCACAGATGCTGCATGGCCGTCGTCAGCTCGTGCCGTGAGGTGTTGGGTTAAGTCCCGCAACGAGCGCAACCC	GGATTAGATACCCGGGTAGTCCACGCCGTAAACGATGAGTACTAGTTGTCGGGGGTATCGACCCCCTCGGTAACGAAGCTAACGCGATAAGTACTCCGCCTGGGGACTACGGCCGCAAGGCTAAAACTCAAAGGAATTGACGGGGGCCCGCACAAGCAGCGGAGCGTGCGGTTTAATTCGAAGCGACGCGAAGAACCTTACCAGGGCTTGACATGGCGGTGACAGCCGGTGAAAGCCGGTCTCCCTTCGGGGCACCGTCACAGATGCTGCATGGCCGTCGTCAGCTCGTGCCGTGAGGTGTTGGGTTAAGTCCCGCAACGAGCGCAACCC	0	0	0	2	2	0.5	2	0	1	3	6	1.5	2	1	0	14	17	4.25	9	51	54	23	137	34.25	3
Bacteria_MP_15	P	1	2	Aged_2_119057	99.398	100	N	Chloroflexi;Unknown_bacteria	nt|GQ487889.1;rdp|S001683688;silva|GQ487889.1.1462	-	-	-	-	-	Bacteria	Bacteria_MP	Bacteria_MP	Bacteria_MP	Bacteria_MP	Bacteria_MP	Bacteria_MP	Aged_2_119057;Aged_1_26715	GGATTAGATACCCGGGTAGTCCACGCCGTAAACGATGGGCACTAGGTGTGAGGGGTATTGACCCCCTTCGTGCCGAAGCTAACGCGATAAGTGCCCCGCCTGGGGAGTACGGCCGCAAGGCTAAAACTCAAAGGAATTGACGGGGGCCCGCACAAGCAGCGGAGCGTGTGGTTTAATTCGACGCAACGCGAAGAACCTTACCAGGGCTTGAACTGCTGGTAGTACTGATCCGAAAGGTGAGGGACCCTTCGGGGAGCCAGTGGAGGTGATGCATGGCTGTCGTCAGCTCGTGCCGTGAGGTGTTGGGTTAAGTCCCGCAACGAGCGCAACCC	GGATTAGATACCCGGGTAGTCCACGCCGTAAACGATGGGCACTAGGTGTGAGGGGTATTGACCCCCTTCGTGCCGAAGCTAACGCATTAAGTGCCCCGCCTGGGGAGTACGGCCGCAAGGCTAAAACTCAAAGGAATTGACGGGGGCCCGCACAAGCAGCGGAGCGTGTGGTTTAATTCGACGCAACGCGAAGAACCTTACCAGGGCTTGAACTGCTGGTAGTACTGATCCGAAAGGTGAGGGACCCTTCGGGGAGCCAGTGGAGGTGATGCATGGCTGTCGTCAGCTCGTGCCGTGAGGTGTTGGGTTAAGTCCCGCAACGAGCGCAACCC	0	0	0	0	0	0	42	23	600	80	745	186.25	31	31	28	12	102	25.5	25	47	64	89	225	56.25	34
Bacteria_MP_17	P	1	2	Aged_1_115889	99.699	100	N	Chloroflexi;Unknown_bacteria	nt|HE818669.1;rdp|S002516039;silva|HE818669.1.1409	-	-	-	-	-	Bacteria	Bacteria_MP	Bacteria_MP	Bacteria_MP	Bacteria_MP	Bacteria_MP	Bacteria_MP	Aged_1_115889;Aged_1_152845;Aged_1_11438;Aged_2_96299	GGATTAGATACCCGGGTAGTCCACGCCGTAAACGATGCGGACTAGGTGTCGGGGGTATCGACCCCCTCGGCGCCGCAGCTAACGCATTAAGTCCGCCGCCTGGGGACTACGGCCGCAAGGCTAAAACTCAAAGGAATTGACGGGGGCCCGCACAAGCAGCGGAGCGTGTGGTTTAATTCGATGCAACGCGCAGAACCTTACCTCGGCTTGACATGCACGTGGTACCGACCCGAAAGGGAAGGGACCCGCGAGGGAGCGTGCACAGATGCTGCATGGCTGTCGTCAGCTCGTGCCGTGAGGTGTTGGGTTAAGTCCCGCAACGAGCGCAACCC	GGATTAGATACCCGGGTAGTCCACGCCGTAAACGATGCGGACTAGGTGTCGGGGGTATCGACCCCCTCGGCGCCGCAGCTAACGCATTAAGTCCGCCGCCTGGGGACTACGGCCGCAAGGCTAAAACTCAAAGGAATTGACGGGGGCCCGCACAAGCAGCGGAGCGTGTGGTTTAATTCGATGCAACGCGCAGAACCTTACCTCGGCTTGACATGCACGTGGTACCAACCCGAAAGGGAAGGGACCCGCGAGGGAGCGTGCACAGATGCTGCATGGCTGTCGTCAGCTCGTGCCGTGAGGTGTTGGGTTAAGTCCCGCAACGAGCGCAACCC	0	0	0	0	0	0	14	5	30	41	90	22.5	46	44	83	24	197	49.25	10	10	26	56	102	25.5	36
Bacteria_MP_19	P	1	2	Compost_1_86487	99.697	100	N	Latescibacteria;Unknown_bacteria	nt|HQ114146.1;rdp|S002419556;silva|HQ114146.1.1477	-	-	-	-	-	Bacteria	Bacteria_MP	Bacteria_MP	Bacteria_MP	Bacteria_MP	Bacteria_MP	Bacteria_MP	Compost_1_86487;Compost_1_133764	GGCTTAGATACCCTGGTAGTCCCAGCTGTAAACTGTGAACACTAGGTGTGGGAGGTATCGACCCCTTCCGTGCCGACGCTAACGCATTAAGTGTTCCGCCTGGGGAGTACGGTCGCAAGGCTGAAACTCAAAGGAATTGACGGGGGCCCGCACAAGCGGTGGAGCATGTGGTTTAATTCGACGCAACGCGAAGAACCTTACCTGGGTTTGACATGCAGGGGACAGGTGTAGAAATACACCCTCTCTTCGGAGTCCTTGCACAGGTGCTGCATGGCTGTCGTCAGCTCGTGTCGTGAGATGTTGGGTTAAGTCCCGCAACGAGCGCAACCC	GGATTAGATACCCTGGTAGTCCCAGCTGTAAACTGTGAACACTAGGTGTGGGAGGTATCGACCCCTTCCGTGCCGGCGCTAACGCATTAAGTGTTCCGCCTGGGGAGTACGGTCGCAAGGCTGAAACTCAAAGGAATTGACGGGGGCCCGCACAAGCGGTGGAGCATGTGGTTTAATTCGACGCAACGCGAAGAACCTTACCTGGGTTTGACATGCAGGGGACAGGTGTAGAAATACACCCTCTCTTCGGAGTCCTTGCACAGGTGCTGCATGGCTGTCGTCAGCTCGTGTCGTGAGATGTTGGGTTAAGTCCCGCAACGAGCGCAACCC	0	0	0	0	0	0	41	83	46	54	224	56	74	29	70	27	200	50	16	4	6	8	34	8.5	11
Bacteria_MP_2	P	5	2	Aged_1_103454	99.699	100	N	Gemmatimonadetes;Unknown_bacteria	nt|AB744305.1;silva|AB744305.1.628	-	-	-	-	-	Bacteria	Bacteria_MP	Bacteria_MP	Bacteria_MP	Bacteria_MP	Bacteria_MP	Bacteria_MP	Aged_1_60131;Aged_1_29620;Aged_1_121981;Aged_1_102679;Aged_1_101667;Aged_1_103454;Aged_1_100686;Aged_1_14099;Aged_2_129701;Aged_1_141271;Aged_1_120336;Aged_1_107882;Aged_1_100338;Aged_1_102441;Aged_1_100352;Aged_2_38429	GGATTAGATACCCTGGTAGTCCACGCCGTAAACGATGGGCACTAGGTGCCGGGGGGAGCGACCCCTTCGGTGCCGCAGCTAACGCGATAAGTGCCCCGCCTGGGGAGTACGGCCGCAAGGCTGAAACTCAAAGGAATTGACGGGGGCCCGCACAAGCGGTGGAGCATGTGGTTTAATTCGAAGCAACGCGAAGAACCTTACCTGGGTTTGACATGCAGGTGAAAGCCTCTGGAAACAGGGGCCCCTCTTCGGAGCACCTGCACAGGTGCTGCATGGCTGTCGTCAGCTCGTGTCGTGAGATGTTGGGTTAAGTCCCGCAACGAGCGCAACCC	GGATTAGATACCCTGGTAGTCCACGCCGTAAACGATGGGCACTAGGTGCCGGGGGGAGCGATCCCTTCGGTGCCGCAGCTAACGCGATAAGTGCCCCGCCTGGGGAGTACGGCCGCAAGGCTGAAACTCAAAGGAATTGACGGGGGCCCGCACAAGCGGTGGAGCATGTGGTTTAATTCGAAGCAACGCGAAGAACCTTACCTGGGTTTGACATGCAGGTGAAAGCCTCTGGAAACAGGGGCCCCTCTTCGGAGCACCTGCACAGGTGCTGCATGGCTGTCGTCAGCTCGTGTCGTGAGATGTTGGGTTAAGTCCCGCAACGAGCGCAACCC	0	0	0	0	0	0	9	2	0	2	13	3.25	35	28	21	38	122	30.5	15	14	20	18	67	16.75	8
Bacteria_MP_20	P	2	2	Aged_1_10288	99.392	100	N	Acidobacteria;Unknown_bacteria	nt|HQ121197.1;rdp|S002976741;silva|HQ121197.1.839	-	-	-	-	-	Bacteria	Bacteria_MP	Bacteria_MP	Bacteria_MP	Bacteria_MP	Bacteria_MP	Bacteria_MP	Aged_1_123892;Aged_1_14449;Aged_1_10288;Aged_1_104577;Aged_2_108765;Aged_1_158797;Aged_1_121857;Aged_1_104226	GGATTAGATACCCTGGTAGTCCTAGCCGTAAACAATGTGCACTTGGTGTAAGCCGGTTTTCGGTTTGTGCCGAAGTTAACGCGATAAGTGCACCGCCTGGGGAGTACGGTCGCAAGTCTGAAACTCAAAGGAATTGACGGGGGCCCGCACAAGCGGTGGAGCATGTGGTTCAATTCGATGCAACGCGAAGAACCTTACCTGGGTTTGAACTGCAACTGAATATTCCAGAGATGGAATAGCCTAGCAATAGACAGTTGCAGAGGTGCTGCATGGCTGTCGTCAGCTCGTGTCGTGAGATGTTGGGTTAAGTCCCGCAACGAGCGCAACCC	GGATTAGATACCCTGGTAGTCCTAGCCGTAAACAATGTGCACTTGGTGTAAGCCGGTTTTCGGTTTGTGCCGAAGTTAACGCGATAAGTGCACCGCCTGGGGAGTACGGTCGCAAGTCTGAAACTCAAAGGAATTGACGGGGGCCCGCACAAGCGGTGGAGCATGTGGTTCAATTCGATGCAACGCGAAGAACCTTACCTGGGTTTGAACTGCAACTGAATATTCCAGAGATGGAATAGGCTAGCAATAGACAGTTGTAGAGGTGCTGCATGGCTGTCGTCAGCTCGTGTCGTGAGATGTTGGGTTAAGTCCCGCAACGAGCGCAACCC	0	0	2	0	2	0.5	3	2	14	30	49	12.25	3	9	12	6	30	7.5	3	7	3	0	13	3.25	0
Bacteria_MP_21	P	1	2	Aged_1_71588	99.091	100	N	Chloroflexi;Unknown_bacteria	nt|HQ397138.1;rdp|S002300733;silva|HQ397138.1.1450	-	-	-	-	-	Bacteria	Bacteria_MP	Bacteria_MP	Bacteria_MP	Bacteria_MP	Bacteria_MP	Bacteria_MP	Aged_1_156564;Aged_2_27149;Aged_1_71588;Aged_1_132047	GGCTTAGATACCCGGGTAGTCCACGCCGTAAACGATGCTCACTAGATGTGGGGGGTATCGACCCCCTCCGCGTCGAAGCTAACGCATTAAGTGAGCCGCCTGGGGAGTACGGCCGCAAGGCTAAAACTCAAAGGAATTGACGGGGGCCCGCACAAGCAGCGGAGCGTGTGGTTTAATTCGATGCAACGCGAAGAACCTTACCTGGGCTTGAACGTGTGGTGACAGCCGGTGAAAGCCGGTCTCCCTTCGGGGCACCATGCGAGGTGATGCACGGCTGTCGTCAGCTCGTGCCGTGAGGTGTTGGGTTAAGTCCCGCAACGAGCGCAACCC	GGATTAGATACCCAAGTAGTNCACGCCGTAAACGATGCTCACTAGATGTGGGGGGTATCGACCCCCTCCGCGTCGAAGCTAACGCATTAAGTGAGCCGCCTGGGGAGTACGGCCGCAAGGCTAAAACTCAAAGGAATTGACGGGGGCCCGCACAAGCAGCGGAGCGTGTGGTTTAATTCGATGCGACGCGAAGAACCTTACCTGGGCTTGAACGTGTGGTGACAGCCGGTGAAAGCCGGTCTCCCTTCGGGGCACTATGCGAGGTGATGCACGGCTGTCGTCAGCTCGTGCCGTGAGGTGTTGGGTTAAGTCCCGAAACGAGCGAAACCC	0	0	0	0	0	0	5	19	37	21	82	20.5	42	13	2	3	60	15	4	0	3	7	14	3.5	3
Bacteria_MP_22	P	15	2	Aged_1_100246	100	100	N	Gemmatimonadetes;Unknown_bacteria	nt|JN091907.1;silva|JN091907.1.1529	-	-	-	-	-	Bacteria	Bacteria_MP	Bacteria_MP	Bacteria_MP	Bacteria_MP	Bacteria_MP	Bacteria_MP	Middle_1_141637;Aged_4_150773;Aged_2_135836;Aged_1_105251;Compost_1_110991;Aged_1_93027;Aged_1_19029;Aged_2_26228;Aged_1_81779;Aged_1_102492;Aged_1_103889;Aged_1_100246;Aged_1_101142;Aged_1_66280;Aged_4_50193;Aged_1_30771;Aged_2_60512;Aged_1_10098;Aged_1_116671;Aged_3_124797;Aged_1_91005;Aged_1_42414;Aged_2_101266;Aged_1_102617;Aged_1_111976;Aged_1_100358;Aged_1_100819;Aged_1_154389;Aged_1_91717;…	GGATTAGATACCCTGGTAGTCCACGCCGTAAACGATGGGCGCTAGGTGTTGGGGAGAGCGACCTCCTCAGTGCCGAAGCTCACGCGATAAGCGCCCCGCCTGGGGAGTACGGCCGCAAGGCTGAAACTCAAAGGAATTGACGGGGGCCCGCACAAGCGGTGGAGCATGTGGTTTAATTCGAAGCAACGCGAAGAACCTTACCTGGGCTTGACATGCACGTGAAAGCCCCTGGAAACAGGGGCCCTCCTTCGGGACACGTGCACAGGTGCTGCATGGCTGTCGTCAGCTCGTGTCGTGAGATGTTGGGTTAAGTCCCGCAACGAGCGCAACCC	GGATTAGATACCCTGGTAGTCCACGCCGTAAACGATGGGCGCTAGGTGTTGGGGAGAGCGACCTCCTCAGTGCCGAAGCTCACGCGATAAGCGCCCCGCCTGGGGAGTACGGCCGCAAGGCTGAAACTCAAAGGAATTGACGGGGGCCCGCACAAGCGGTGGAGCATGTGGTTTAATTCGAAGCAACGCGAAGAACCTTACCTGGGCTTGACATGCACGTGAAAGCCCCTGGAAACAGGGGCCCTCCTTCGGGACACGTGCACAGGTGCTGCATGGCTGTCGTCAGCTCGTGTCGTGAGATGTTGGGTTAAGTCCCGCAACGAGCGCAACCC	0	0	1	1	2	0.5	143	121	283	460	1007	251.75	303	1041	125	64	1533	383.25	557	78	111	136	882	220.5	85
Bacteria_MP_23	P	1	2	Compost_1_107625	100	100	N	Chloroflexi;Unknown_bacteria	nt|JX394935.1;silva|JX394935.1.748	-	-	-	-	-	Bacteria	Bacteria_MP	Bacteria_MP	Bacteria_MP	Bacteria_MP	Bacteria_MP	Bacteria_MP	Compost_1_107625	GGATTAGATACCCCGGTAGTCCTAGCCGTAAACGATGGACACTAGGTGTTGGTGGTATCAACCCCACCAGTGCCGAAGCTAACGCATTAAGTGTCCCGCCTGGGGAGTACGGCCGCAAGGCTAAAACTCAAAGGAATTGACGGGGCCCCGCACAAGCAGCGGAGCGTGGGGTTTAATTCGATGCAACGCGAAGAACCTTACCAGGGCTTGACATGACCAGGACAGCGGCGGAAACGTCGCCTTCCCGCAAGGGACCTGGCCACAGGTGTTGCATGGCTGTCGTCAGCTCGTGTCGTGAGATGTTGGGTTAAGTCCCGCAACGAGCGCAACCC	GGATTAGATACCCCGGTAGTCCTAGCCGTAAACGATGGACACTAGGTGTTGGTGGTATCAACCCCACCAGTGCCGAAGCTAACGCATTAAGTGTCCCGCCTGGGGAGTACGGCCGCAAGGCTAAAACTCAAAGGAATTGACGGGGCCCCGCACAAGCAGCGGAGCGTGGGGTTTAATTCGATGCAACGCGAAGAACCTTACCAGGGCTTGACATGACCAGGACAGCGGCGGAAACGTCGCCTTCCCGCAAGGGACCTGGCCACAGGTGTTGCATGGCTGTCGTCAGCTCGTGTCGTGAGATGTTGGGTTAAGTCCCGCAACGAGCGCAACCC	0	0	0	0	0	0	4	3	5	8	20	5	19	12	44	28	103	25.75	96	156	80	41	373	93.25	53
Bacteria_MP_26	P	1	2	Aged_1_10019	99.388	99.0909	N	Chloroflexi;Unknown_bacteria	nt|KM298471.1;rdp|S004347976;silva|KM298471.1.557	-	-	-	-	-	Bacteria	Bacteria_MP	Bacteria_MP	Bacteria_MP	Bacteria_MP	Bacteria_MP	Bacteria_MP	Aged_1_90303;Aged_1_67598;Aged_1_10019;Aged_1_100581;Aged_1_111352;Compost_1_45823;Aged_1_145239;Aged_1_149483	GGATTAGATACCCGGGTAGTCCACGCTGTAAACGATGGGTACTCGGTGTGGGGGGTATCGACCCCCTCCGCGCCCCAGCTAACGCGATAAGTACCCCGCCTGGGGAGTACGGCCGCAAGGCTAAAACTCAAAGGAATTGACGGGGGCCCGCACAAGCAGCGGAGCGTGTGGTTTAATTCGATGCAACGCGAAGAACCTTACCTGGGCTTGACATGCACCGGACCGGTCGGGAAACCGGCCCTCCCTTCGGGGCTGGTGCACAGGTGCTGCATGGCTGTCGTCAGCTCGTGCCGTGAGGTGTTGGGTTAAGTCCCGCAACGAGCGCAACCC	TAGATACCCAGGTAGTCCACGCTGTAAACGATGGGTACTCGGTGTGGGGGGTATCGACCCCCTCCGCGCCCCAGCTAACGCGATAAGTACCCCGCCTGGGGAGTACGGCCGCAAGGCTAAAACTCAAAGGAATTGACGGGGGCCCGCACAAGCAGCGGAGCGTGTGGTTTAATTCGATGCAACGCGAAGAACCTTACCTGGGCTTGACATGCACCGGGACCGGTCGGGAAACCGGCCCTCCCTTCGGGGCTGGTGCACAGGTGCTGCATGGCTGTCGTCAGCTCGTGCCGTGAGGTGTTGGGTTAAGTCCCGCAACGAGCGCAACCC	0	0	0	0	0	0	0	0	0	0	0	0	0	1	1	0	2	0.5	12	2	1	4	19	4.75	21
Bacteria_MP_27	P	1	2	Aged_1_118216	99.085	99.0937	N	Acidobacteria;Unknown_bacteria	nt|KM327943.1;rdp|S004377342;silva|KM327943.1.557	-	-	-	-	-	Bacteria	Bacteria_MP	Bacteria_MP	Bacteria_MP	Bacteria_MP	Bacteria_MP	Bacteria_MP	Aged_1_130101;Aged_1_10479;Aged_1_118216;Aged_1_67848	GGCTTAGATACCCTGGTAGTCCTAGCCCTAAACGATGGATACTTGGTGTGGGAGGGTTGAATCCTTCCGTGCCGGAGCTAACGCGTTAAGTATCCCGCCTGGGGAGTACGGTCGCAAGGCTGAAACTCAAAGGAATTGACGGGGGCCCGCACAAGCGGTGGAGCATGTGGTTTAATTCGACGCAACGCGAAGAACCTTACCTGGGCTCGAACGGCTAGTGACAGAGGGTGAAAGCTCTCCTTCCTTTCGGGGACACTAGTCGAGGTGCTGCATGGCTGTCGACAGCTCGTGTCGTGAGATGTTGGGTTAAGTCCCGCAACGAGCGCAACCC	TAGATACCCGGGTAGTCCTAGCCCTAAACGATGGATACTTGGTGTGGGAGGGGTTGAATCCTTCCGTGCCGGAGCTAACGCGTTAAGTATCCCGCCTGGGGAGTACGGTCGCAAGGCTGAAACTCAAAGGAATTGACGGGGGCCCGCACAAGCGGTGGAGCATGTGGTTTAATTCGACGCAACGCGAAGAACCTTACCTGGGCTCGAACGGCTAGTGACAGAGGGTGAAAGCTCTTCTTCCCTTCGGGGACACTAGTCGAGGTGCTGCATGGCTGTCGACAGCTCGTGTCGTGAGATGTTGGGTTAAGTCCCGCAACGAGCGCAACCC	0	1	0	0	1	0.25	11	14	8	19	52	13	15	15	14	11	55	13.75	16	5	33	17	71	17.75	9
Bacteria_MP_28	P	1	2	Aged_3_33340	99.088	99.0964	Y	Gemmatimonadetes;Unknown_bacteria	nt|KM328001.1;silva|KM328001.1.553	-	-	-	-	-	Bacteria	Bacteria_MP	Bacteria_MP	Bacteria_MP	Bacteria_MP	Bacteria_MP	Bacteria_MP	Aged_2_109151;Aged_1_129173;Aged_1_39910;Aged_1_105134;Aged_1_112012;Aged_3_33340;Aged_1_101033;Aged_2_61508;Aged_1_137545;Aged_1_126914	GGCTTAGATACCCCGGTAGTCCACGCCGTAAACGATGGGCGCTAGGTGCTGGGGGGAGCGACTCCCTCGGTGCCGCAGCTAACGCGATAAGCGCCCCGCCTGGGGAGTACGGCCGCAAGGCTGAAACTCAAAGGAATTGACGGGGGCCCGCACAAGCGGTGGAGCATGTGGTTTAATTCGAAGCAACGCGAAGAACCTTACCTGGGCTTGACATTGACGTGAAACTCCCCGGAAAGGGGGAGCCCTCTTCGGAGCACGTCAACAGGTGCTGCATGGCTGTCGTCAGCTCGTGTCGTGAGATGTTGGGTTAAGTCCCGCAACGAGCGCAACCC	TAGATACCCCGGTAGTCCACGCCGTAAACGATGGGCGCTAGGTGCTGGGGGGGAGCGACTCCCTCGGTGCCGCAGCTAACGCGATAAGCGCCCCGCCTGGGGAGTACGGCCGCAAGGCTGAAACTCAAAGGAATTGACGGGGGCCCGCACAAGCGGTGGAGCATGTGGTTTAATTCGAAACAACGCGAAGAACCTTACCTGGGCTTGACATTGACGTGAAACTCCCCGGAAAGGGGGAGCCCTCTTCGGAGCACGTCAACAGGTGCTGCATGGCTGCCGTCAGCTCGTGTCGTGAGATGTTGGGTTAAGTCCCGCAACGAGCGCAACCC	0	0	0	0	0	0	7	1	1	8	17	4.25	20	11	28	36	95	23.75	23	21	20	6	70	17.5	3
Bacteria_MP_29	P	1	2	Aged_1_114956	99.112	99.4118	N	Planctomycetes;Unknown_bacteria	nt|KM329430.1;silva|KM329430.1.541	-	-	-	-	-	Bacteria	Bacteria_MP	Bacteria_MP	Bacteria_MP	Bacteria_MP	Bacteria_MP	Bacteria_MP	Aged_1_114956;Aged_1_129067;Aged_1_142183	GGATTAGATACCCCGGTAGTCCTAGCCGTAAACGATGGGCACTAGACAGGGGGGGTGCCTATGACCCTCTCTGTCGTAGCTAATGTGTTAAGTGCCCCGCCTGGGGAGTACGCTCGCAAGGGTAAAACTCAAAGGAATTGACGGGGGCTCACACAAGCGGTGGAGCATGTGGTTTAATTCGAAGCAACGCGAAGAACCTTACCTGGCCTTGACTTGCACGGATTAGTCTCCCGAAAGGGAGGTGACACCTCTTCGGAGGCGGAACGTGTGCAGGTGTTGCATGGCTGTCGTCAGCTCGTGTCGTGAGATGTTGGGTTAAGTCCCGTAACGAGCGCAACCC	TAGATACCCAGGTAGTCCTAGCCGTAAACGATGGGCACTAGACAGGGGGGGTGCCTATGACCCTCTCTGTCGTAGCTAATGTGTTAAGTGCCCCGCCTGGGGAGTACGCTCGCAAGGGGTAAAACTCAAAGGAATTGACGGGGGGCTCACACAAGCGGTGGAGCATGTGGTTTAATTCGAAGCAACGCGAAGAACCTTACCTGGCCTTGACTTGCACGGATTAGTCTCCCGAAAGGGAGGTGACACCTCTTCGGAGGCGGAACGTGTGCAGGTGTTGCATGGCTGTCGTCAGCTCGTGTCGTGAGATGTTGGGTTAAGTCCCGTAACGAGCGCAACCC	0	0	0	0	0	0	1	4	1	2	8	2	2	4	5	6	17	4.25	26	26	39	39	130	32.5	6
Bacteria_MP_3	P	1	2	Aged_1_112915	99.091	100	N	Latescibacteria;Unknown_bacteria	nt|AF142973.1;rdp|S000338627;silva|AF142973.1.1004	-	-	-	-	-	Bacteria	Bacteria_MP	Bacteria_MP	Bacteria_MP	Bacteria_MP	Bacteria_MP	Bacteria_MP	Aged_1_118927;Aged_1_74067;Aged_1_112915;Aged_1_119175;Aged_1_112562;Aged_1_126733;Aged_1_124949;Aged_1_11995	GGATTAGATACCCTGGTAGTCCTAGCCGTAAACGGTGAGCACTAGGTGTAGGAGGCATCGACCCCTCCTGTGCCGCAGCTAACGCATTAAGTGCTCCGCCTGGGGAGTACGACCGCAAGGTTGAAACTCAAAGGAATTGACGGGGGCCCGCACAAGCGGTGGAGCATGTGGTTTAATTCGATGCAACGCGAAGAACCTTACCCAGATTTGACATGCACTGGACCGGTGTGGAAACACACCTTCCCTTCGGGGCTGGTGCACAGGTGCTGCATGGCTGTCGTCAGCTCGTGTCGTGAGATGTTGGGTTAAGTCCCGCAACGAGCGCAACCC	GGATTAGATACCCTGGTAGTCCTAGCCGTAAACGGTGAGCACTAGGTGTAGGAGGCATCGACCCCTCCTGTGCCGCAGCTAACGCATTAAGTGCTCCGCCTGGGGAGTACGACCGCAAGGTTGAAACTCAAAGGAATTGACGGGGGCCCGCACAAGCGGTGGAGCATGTGGTTTAATTCGATGCAACGCGAAGAACCTTACCCAGATTTGACATGCATTGGACCGGTGTGGAAACACACCTTCCCTTCGGGGCCGATGCACAGGTGCTGCATGGCTGTCGTCAGCTCGTGTCGTGAGATGTTGGGTTAAGTCCCGCAACGAGCGCAACCC	1	0	0	0	1	0.25	13	9	61	94	177	44.25	24	85	19	4	132	33	20	5	6	3	34	8.5	2
Bacteria_MP_30	P	1	2	Aged_1_143321	99.696	99.0964	N	Gemmatimonadetes;Unknown_bacteria	nt|KM336848.1;silva|KM336848.1.547	-	-	-	-	-	Bacteria	Bacteria_MP	Bacteria_MP	Bacteria_MP	Bacteria_MP	Bacteria_MP	Bacteria_MP	Aged_1_157843;Aged_1_143321	GGCTTAGATACCCTGGTAGTCCACGCCGTAAACGATGGGCACTAGGTGCCGGGGGGAGCGACCCCGTCGGTGCCGCAGCTAACGCGATAAGTGCCCCGCCTGGGGAGTACGGCCGCAAGGCTGAAACTCAAAGGAATTGACGGGGGCCCGCACAAGCGGTGGAGCATGTGGTTTAATTCGAAGCAACGCGAAGAACCTTACCTGGGTTTGACATGCACGTGAAACTCTCTGGAAACAGGGGGCCCTCTTCGGAGCACGTGCACAGGTGCTGCATGGCTGTCGTCAGCTCGTGTCGTGAGATGTTGGGTTAAGTCCCGCAACGAGCGCGACCC	TAGATACCCGGGTAGTCCACGCCGTAAACGATGGGCACTAGGTGCCGGGGGGGAGCGACCCCGTCGGTGCCGCAGCTAACGCGATAAGTGCCCCGCCTGGGGAGTACGGCCGCAAGGCTGAAACTCAAAGGAATTGACGGGGGCCCGCACAAGCGGTGGAGCATGTGGTTTAATTCGAAGCAACGCGAAGAACCTTACCTGGGTTTGACATGCACGTGAAACTCTCTGGAAACAGGGGGCCCTCTTCGGAGCACGTGCACAGGTGCTGCATGGCTGTCGTCAGCTCGTGTCGTGAGATGTTGGGTTAAGTCCCGCAACGAGCGCAACCC	0	0	0	0	0	0	0	0	1	0	1	0.25	0	4	0	0	4	1	12	50	30	62	154	38.5	4
Bacteria_MP_31	P	21	2	Aged_1_100607	99.696	99.0964	N	Gemmatimonadetes;Unknown_bacteria	nt|KM339872.1;silva|KM339872.1.563	-	-	-	-	-	Bacteria	Bacteria_MP	Bacteria_MP	Bacteria_MP	Bacteria_MP	Bacteria_MP	Bacteria_MP	Aged_1_135869;Aged_1_103792;Aged_1_14197;Aged_1_112543;Aged_1_10483;Aged_1_123344;Aged_1_115958;Aged_1_100560;Aged_1_103812;Aged_1_100607;Aged_1_100472;Aged_1_153073;Aged_1_147204;Aged_1_156292;Aged_1_140798;Aged_1_94076;Aged_1_3606;Aged_3_92026;Aged_1_115593;Aged_3_158568;Aged_1_41120;Aged_1_25770;Aged_3_95764;Aged_1_102148;Aged_1_102926;Aged_1_101143;Aged_1_100134;Aged_3_108707;Aged_1_158895;Ag…	GGATTAGATACCCTGGTAGTCCACGCCGTAAACGATGGGCGCTAGGTGGCGGGGGGAGCGACCCCCTCGGTGCCGAAGCTTACGCGATAAGCGCCCCGCCTGGGGAGTACGGCCGCAAGGCTGAAACTCAAAGGAATTGACGGGGGCCCGCACAAGCGGTGGAGCATGTGGTTTAATTCGAAGCAACGCGAAGAACCTTACCTGGGCTTGACATCCTGGTGAAAGCCCTTGGAAACAGGGGCCCTCCTTCGGGACACCAGGACAGGTGCTGCATGGCTGTCGTCAGCTCGTGTCGTGAGATGTTGGGTTAAGTCCCGCAACGAGCGCAACCC	TAGATACCCGGGTAGTCCACGCCGTAAACGATGGGCGCTAGGTGGCGGGGGGAGCGACCCCCTCGGTGCCGAAGCTTACGCGATAAGCGCCCCGCCTGGGGAGTACGGCCGCAAGGCTGAAACTCAAAGGAATTGACGGGGGCCCGCACGAAGCGGTGGAGCATGTGGTTTAATTCGAAGCAACGCGAAGAACCTTACCTGGGCTTGACATCCTGGTGAAAGCCCTTGGAAACAGGGGCCCTCCTTCGGGACACCAGGACAGGTGCTGCATGGCTGTCGTCAGCTCGTGTCGTGAGATGTTGGGTTAAGTCCCGCAACGAGCGCAACCC	0	1	0	0	1	0.25	0	0	0	0	0	0	1	2	0	1	4	1	33	12	28	26	99	24.75	58
Bacteria_MP_32	P	1	2	Aged_1_56723	99.695	99.0937	N	Gemmatimonadetes;Unknown_bacteria	nt|KM340181.1;silva|KM340181.1.562	-	-	-	-	-	Bacteria	Bacteria_MP	Bacteria_MP	Bacteria_MP	Bacteria_MP	Bacteria_MP	Bacteria_MP	Aged_1_56723	GGATTAGATACCCTGGTAGTCCACGCCGTAAACGATGGGCGCTAGGTGGCGGGGGAGCGACCCCCTCGGTGCCGAAGCTTACGCGATAAGCGCCCCGCCTGGGGAGTACGGCCGCAAGGCTGAAACTCAAAGGAATTGACGGGGGCCCGCACAAGCGGTGGAGCATGTGGTTTAATTCGAAGCAACGCGAAGAACCTTACCTGGGCTTGACATCCTGGTGAAAGCCCTTGGAAACAGGGGCCCTCCTTCGGGACACCAGGACAGGTGCTGCATGGCTGTCGTCAGCTCGTGTCGTGAGATGTTGGGTTAAGTCCCGCAACGAGCGCAACCC	TAGATACCCGGGTAGTCCACGCCGTAAACGATGGGCGCTAGGTGGCGGGGGGAGCGACCCCCTCGGTGCCGAAGCTTACGCGATAAGCGCCCCGCCTGGGGAGTACGGCCGCAAGGCTGAAACTCAAAGGAATTGACGGGGGCCCGCACAAGCGGTGGAGCATGTGGTTTAATTCGAAGCAACGCGAAGAACCTTACCTGGGCTTGACATCCTGGTGAAAGCCCTTGGAAACAGGGGCCCTCCTTCGGGACACCAGGACAGGTGCTGCATGGCTGTCGTCAGCTCGTGTCGTGAGATGTTGGGTTAAGTCCCGCAACGAGCGCAACCC	0	0	0	0	0	0	0	0	0	0	0	0	3	3	1	0	7	1.75	71	46	31	51	199	49.75	13
Bacteria_MP_33	P	1	2	Aged_1_102020	99.392	99.0964	N	Gemmatimonadetes;Unknown_bacteria	nt|KM340636.1;silva|KM340636.1.545	-	-	-	-	-	Bacteria	Bacteria_MP	Bacteria_MP	Bacteria_MP	Bacteria_MP	Bacteria_MP	Bacteria_MP	Aged_1_110273;Aged_1_113064;Aged_1_102020;Aged_1_114546;Aged_1_106209;Aged_1_82751;Aged_1_105191;Aged_1_100137	GGATTAGATACCCTGGTAGTCCACGCCGTAAACGATGGGCGCTAGGTGGCGGGGGGAGCGACCCCCTCGGTGCCGAAGCTCACGCGATAAGCGCCCCGCCTGGGGAGTACGGCCGCAAGGCTGAAACTCAAAGGAATTGACGGGGGCCCGCACAAGCGGTGGAGCATGTGGTTTAATTCGAAGCAACGCGAAGAACCTTACCTGGGCTTGACATCCTGGTGAAAGCCCCTGGAAACAGGAGCCCTCCTTCGGGACACCAGGACAGGTGCTGCATGGCTGTCGTCAGCTCGTGTCGTGAGATGTTGGGTTAAGTCCCGCAACGAGCGCAACCC	TAGATACCCAGGTAGTCCACGCCGTAAACGATGGGCGCTAGGTGGCGGGGGGGAGCGACCCCCTCGGTGCCGAAGCTCACGCGATAAGCGCCCCGCCTGGGGAGTACGGCCGCAAGGCTGAAACTCAAAGGAATTGACGGGGGCCCGCACAAGCGGTGGAGCATGTGGTTTAATTCGAAGCAACGCGAAGAACCTTACCTGGGCTTGACATCCTGGTGAAAGCCCCTGGAAACAGGAGCCCTCCTTCGGGACACCAGGACAGGTGCTGCATGGCTGTCGTCAGCTCGTGTCGTGAGATGTTGGGTTAAGTCCCGCAACGAGCGCAACCC	0	0	0	0	0	0	3	0	0	0	3	0.75	0	0	2	0	2	0.5	70	5	14	31	120	30	81
Bacteria_MP_34	P	1	2	Aged_1_101003	99.696	99.0964	N	Gemmatimonadetes;Unknown_bacteria	nt|KM343568.1;silva|KM343568.1.531	-	-	-	-	-	Bacteria	Bacteria_MP	Bacteria_MP	Bacteria_MP	Bacteria_MP	Bacteria_MP	Bacteria_MP	Aged_1_120627;Aged_1_10838;Aged_1_10204;Aged_1_10316;Aged_1_11562;Aged_1_101003;Aged_1_144449	GGCTTAGATACCCTGGTAGTCCACGCCGTAAACGATGGGCACCAGGTGCCGGGGGGAGCGACCCCTTCGGTGCCGCAGCTAACGCGATAAGTGCCCCGCCTGGGGAGTACGGCCGCAAGGCTGAAACTCAAAGGAATTGACGGGGGCCCGCACAAGCGGTGGAGCATGTGGTTTAATTCGAAGCAACGCGAAGAACCTTACCTGGGTTTGACATGCACGTGAAAGCCCTGTGAAAGCAGGGCCCCTCTTCGGAGCGCGTGCACAGGTGCTGCATGGCTGTCGTCAGCTCGTGTCGTGAGATGTTGGGTTAAGTCCCGCAACGAGCGCAACCC	TAGATACCCCGGTAGTCCACGCCGTAAACGATGGGCACCAGGTGCCGGGGGGGAGCGACCCCTTCGGTGCCGCAGCTAACGCGATAAGTGCCCCGCCTGGGGAGTACGGCCGCAAGGCTGAAACTCAAAGGAATTGACGGGGGCCCGCACAAGCGGTGGAGCATGTGGTTTAATTCGAAGCAACGCGAAGAACCTTACCTGGGTTTGACATGCACGTGAAAGCCCTGTGAAAGCAGGGCCCCTCTTCGGAGCGCGTGCACAGGTGCTGCATGGCTGTCGTCAGCTCGTGTCGTGAGATGTTGGGTTAAGTCCCGCAACGAGCGCAACCC	0	0	0	0	0	0	2	0	0	0	2	0.5	0	0	1	2	3	0.75	28	14	26	39	107	26.75	33
Bacteria_MP_35	P	1	2	Aged_3_104900	99.699	100	N	Gemmatimonadetes;Unknown_bacteria	nt|KM456118.1;silva|KM456118.1.1478	-	-	-	-	-	Bacteria	Bacteria_MP	Bacteria_MP	Bacteria_MP	Bacteria_MP	Bacteria_MP	Bacteria_MP	Aged_3_104900	GGATTAGATACCCTGGTAGTCCACGCCGTAAACGATGGGCACTAGATGCCGGGGGGAGCGACCCCGTCGGTGTCGCAGCTAACGCGATAAGTGCCCCGCCTGGGGAGTACGGCCGCAAGGCTGAAACTCAAAGGAATTGACGGGGGCCCGCACAAGCGGTGGAGCATGTGGTTTAATTCGAAGCAACGCGAAGAACCTTACCTGGGTTTGACATGCTGGTGAAAGCCTCATGAAAGTGGGGCCCTTCTTCGGAACACCAGCACAGGTGCTGCATGGCTGTCGTCAGCTCGTGTCGTGAGATGTTGGGTTAAGTCCCGCAACGAGCGCAACCC	GGATTAGATACCCTGGTAGTCCACGCCGTAAACGATGGGCACTAGATGCCGGGGGGAGCGACCCCGTCGGTGTCGTAGCTAACGCGATAAGTGCCCCGCCTGGGGAGTACGGCCGCAAGGCTGAAACTCAAAGGAATTGACGGGGGCCCGCACAAGCGGTGGAGCATGTGGTTTAATTCGAAGCAACGCGAAGAACCTTACCTGGGTTTGACATGCTGGTGAAAGCCTCATGAAAGTGGGGCCCTTCTTCGGAACACCAGCACAGGTGCTGCATGGCTGTCGTCAGCTCGTGTCGTGAGATGTTGGGTTAAGTCCCGCAACGAGCGCAACCC	0	0	0	0	0	0	0	0	0	0	0	0	0	0	0	0	0	0	7	8	7	3	25	6.25	3
Bacteria_MP_36	P	1	2	Aged_1_161040	99.699	100	N	Chloroflexi;Unknown_bacteria	nt|LN563623.1;rdp|S004419390;silva|LN563623.1.1330	-	-	-	-	-	Bacteria	Bacteria_MP	Bacteria_MP	Bacteria_MP	Bacteria_MP	Bacteria_MP	Bacteria_MP	Aged_1_42844;Aged_2_115597;Aged_1_161040;Aged_1_108260;Compost_1_118948;Aged_1_102400;Aged_1_104996;Aged_1_50806	GGATTAGATACCCCGGTAGTCCTAGCCGTAAACGATGGACACTAGGTGTTGGTGGTATCAACCCCGCCAGTGCCGTAGCTAACGCATTAAGTGTCCCGCCTGGGGAGTACGGCCGCAAGGCTAAAACTCAAAGGAATTGACGGGGGCCCGCACAAGCAGCGGAGCGTGGGGTTTAATTCGATGCAACGCGAAGAACCTTACCAGGGCTTGACATGGTCAGGAATCCGGCGGAAACGTCGGCGGCCCGCAAGGGACCTGATCACAGGTGTTGCATGGCTGTCGTCAGCTCGTGTCGTGAGATGTTGGGTTAAGTCCCGCAACGAGCGCAACCC	GGATTAGATACCCCGGTAGTCCTAGCCGTAAACGATGGACACTAGGTGTTGGTGGTATCAACCCCGCCAGTGCCGTAGCTAACGCATTAAGTGTCCCGCCTGGGGAGTACGGCCGCAAGGCTAAAACTCAAAGGAATTGACGGGGGCCCGCACAAGCAGCGGAGCGTGGGGTTTAATTCGATGCAACGCGAAGAACCTTACCAGGGCTTGACATGGTCAGGAATCCGGCGGAAACGTCGGCGTCCCGCAAGGGACCTGATCACAGGTGTTGCATGGCTGTCGTCAGCTCGTGTCGTGAGATGTTGGGTTAAGTCCCGCAACGAGCGCAACCC	0	0	0	0	0	0	0	0	0	0	0	0	0	0	0	1	1	0.25	9	13	6	13	41	10.25	11
Bacteria_MP_37	P	1	2	Aged_1_102032	99.096	100	N	Gemmatimonadetes;Unknown_bacteria	nt|LN566339.1;silva|LN566339.1.1394	-	-	-	-	-	Bacteria	Bacteria_MP	Bacteria_MP	Bacteria_MP	Bacteria_MP	Bacteria_MP	Bacteria_MP	Aged_1_105522;Aged_1_56181;Aged_1_102032;Aged_1_129017;Aged_2_62023;Aged_1_156792;Aged_1_132807;Aged_2_130321	GGATTAGATACCCTGGTAGTCCACGCCGTAAACGATGGGTGCTAGATGCCGGGGGGAGCGACCCCTTCGGTGTCGTAGCTAACGCGTTAAGCACCCCGCCTGGGGAGTACGGCCGCAAGGCTGAAACTCAAAGGAATTGACGGGGGCCCGCACAAGCGGTGGAGCATGTGGTTTAATTCGAAGCAACGCGAAGAACCTTACCTGGGTTTGACATGCACGTGAAACTCCTTGGAAACAGGGAGCCTCCTTCGGGACACGTGCACAGGTGCTGCATGGCTGTCGTCAGCTCGTGTCGTGAGATGTTGGGTTAAGTCCCGCAACGAGCGCAACCC	GGATTAGATACCCTGGTAGTCCACGCCGTAAACGATGGGTGCTAGATGCCGGGGGGAGCGACCCCTTCGGTGTCGCAGCTAACGCGTTAAGCACCCCGCCTGGGGAGTACGGCCGCAAGGCTGAAACTCAAAGGAATTGACGGGGGCCCGCACAAGCGGTGGAGCATGTGGTTTAATTCGAAGCAACGCGAAGAACCTTACCTGGGTTTGACATGCACGTGAAACTCTCTGGAAACAGGGAGCCTCCTTCGGGACACGTGCACAGGTGCTGCATGGCTGTCGTCAGCTCGTGTCGTGAGATGTTGGGTTAAGTCCCGCAACGAGCGCAACCC	0	0	0	0	0	0	1	0	0	2	3	0.75	1	0	4	0	5	1.25	11	8	3	5	27	6.75	15
Bacteria_MP_4	P	1	2	Aged_3_143151	99.398	100	N	Gemmatimonadetes;Unknown_bacteria	nt|AM930306.1;silva|AM930306.1.1521	-	-	-	-	-	Bacteria	Bacteria_MP	Bacteria_MP	Bacteria_MP	Bacteria_MP	Bacteria_MP	Bacteria_MP	Compost_2_133432;Compost_1_2938;Aged_3_143151;Aged_4_73459;Aged_4_36250;Compost_3_96422;Aged_2_59423;Litter_1_103489	GGATTAGATACCCTGGTAGTCCACGCCGTAAACGATGGGTGCTAGATGGCGGGGGGAGCGACCCCTTCGCTGTCGTAGCTAACGCGTTAAGCACCCCGCCTGGGGAGTACGGCCGCAAGGCTGAAACTCAAAGGAATTGACGGGGGCCCGCACAAGCGGTGGAGCATGTGGTTTAATTCGAAGCAACGCGAAGAACCTTACCTGGGTTTGACATGCACGTGAAACTCTCTGGAAACAGGGAGCCTCCTTCGGGACACGTGCACAGGTGCTGCATGGCTGTCGTCAGCTCGTGTCGTGAGATGTTGGGTTAAGTCCCGCAACGAGCGCAACCC	GGATTAGATACCCTGGTAATCCACGCCGTAAACGATGGGTGCTAGATGGCGGGGGGAGCGACCCCTTCGCTGTCGTAGCTAACGCGTTAAGCACCCCGCCTGGGGAGTACGGCCGCAAGGCTGAAACTCAAAGGAATTGACGGGGGCCCGCACAAGCGGTGGAGCATGTGGTTTAATTCGAAGCAACGCGAAGAACCTTACCTGGGTTTGACATGCACGTGAAACTCTCTGGAAACAGGGAGCCTCCTTCGGGACACGTGCATAGGTGCTGCATGGCTGTCGTCAGCTCGTGTCGTGAGATGTTGGGTTAAGTCCCGCAACGAGCGCAACCC	0	0	0	0	0	0	2	1	1	1	5	1.25	5	3	7	7	22	5.5	3	1	1	0	5	1.25	2
Bacteria_MP_7	P	1	2	Aged_1_11256	99.398	100	N	Chloroflexi;Unknown_bacteria	nt|CU921049.1;rdp|S004112585;silva|CU921049.1.1312	-	-	-	-	-	Bacteria	Bacteria_MP	Bacteria_MP	Bacteria_MP	Bacteria_MP	Bacteria_MP	Bacteria_MP	Aged_1_151506;Aged_1_11256	GGCTTAGATACCCGGGTAGTCCACGCCGTAAACGATGAGTACTAGGTGTAGGGGGTATCGACCCCCTCTGTGCCGAAGCTAACGCGATAAGTACTCCGCCTGGGGACTACGGCCGCAAGGCTAAAACTCAAAGGAATTGACGGGGGCCCGCACAAGCAGCGGAGCGTGTGGTTTAATTCGATGATACGCGAAGAACCTCACCCAGGTTTGACATGCATGTGGTACGGATCTGAAAGGTGAAGGACCCTTCGGGGAGCATGCACAGGTGTTGCACGGCCGTCGTCAGCTCGTGCCGTGAGGTGTTGGGTTAAGTCCCGCAACGAGCGCGACCC	GGATTAGATACCCGGGTAGTCCACGCCGTAAACGATGAGTACTAGGTGTAGGGGGTATCGACCCCCTCTGTGCCGAAGCTAACGCGATAAGTACTCCGCCTGGGGACTACGGCCGCAAGGCTAAAACTCAAAGGAATTGACGGGGGCCCGCACAAGCAGCGGAGCGTGTGGTTTAATTCGATGATACGCGAAGAACCTCACCCAGGTTTGACATGCATGTGGTACGGATGTGAAAGCTGAAGGACCCTTCGGGGAGCATGCACAGGTGTTGCACGGCCGTCGTCAGCTCGTGCCGTGAGGTGTTGGGTTAAGTCCCGCAACGAGCGCAACCC	0	0	0	0	0	0	0	0	0	0	0	0	0	0	0	0	0	0	5	9	7	4	25	6.25	2
Bacteria_MP_8	P	1	2	Compost_1_101729	99.096	100	N	Gemmatimonadetes;Unknown_bacteria	nt|EF157218.1;silva|EF157218.1.1477	-	-	-	-	-	Bacteria	Bacteria_MP	Bacteria_MP	Bacteria_MP	Bacteria_MP	Bacteria_MP	Bacteria_MP	Compost_1_101729	GGCTTAGATACCCTGGTAGTCCACGCCGTAAACGATGGGCACTAGGTGCTGGGGGGAGCGACCCCTTCGGTGCCGCAGCTAACGCGTTAAGTGCCCCGCCTGGGGAGTACGGCCGCAAGGCTGAAACTCAAAGGAATTGACGGGGGCCCGCACAAGCGGTGGAGCATGTGGTTTAATTCGAAGCAACGCGAAGAACCTTACCTGGGTTTGACATGCACGTGAAAGCCTTGTGAAAGCAGGGCCCTCCTTCGGGACGCGTGCACAGGTGCTGCATGGCTGTCGTCAGCTCGTGTCGTGAGATGTTGGGTTAAGTCCCGCAACGAGCGCAACCC	GGATTAGATACCCTGGTAGTCCACGCCGTAAACGATGGGCACTAGGTGCTGGGGGGAACGACCCCTTCGGTGCCGCAGCTAACGCGTTAAGTGCCCCGCCTGGGGAGTACGGCCGCAAGGCTGAAACTCAAAGGAATTGACGGGGGCCCGCACAAGCGGTGGAGCATGTGGTTTAATTCGAAGCAACGCGAAGAACCTTACCTGGGTTTGACATGCACGTGAAAGCCCTGTGAAAGCAGGGCCCTCCTTCGGGACACGTGCACAGGTGCTGCATGGCTGTCGTCAGCTCGTGTCGTGAGATGTTGGGTTAAGTCCCGCAACGAGCGCAACCC	0	0	0	0	0	0	3	1	4	11	19	4.75	3	21	2	0	26	6.5	8	2	1	1	12	3	1
Bacteria_MP_9	P	2	2	Aged_4_66816	100	100	N	Chloroflexi;Unknown_bacteria	nt|EF189130.1;rdp|S003588898;silva|EF189130.1.901	-	-	-	-	-	Bacteria	Bacteria_MP	Bacteria_MP	Bacteria_MP	Bacteria_MP	Bacteria_MP	Bacteria_MP	Aged_4_66816	GGATTAGATACCCCGGTAGTCCTAGCCGTAAACGATGGACACTAGGTGTTGGTGGTATCAACCCCACCAGTGCCGTAGCTAACGCATTAAGTGTCCCGCCTGGGGAGTACGGCCGCAAGGCTAAAACTCAAAGGAATTGACGGGGGCCCGCACAAGCAGCGGAGCGTGGGGTTTAATTCGACGCAACGCGAAGAACCTTACCAGGGCTTGACATGACCAGGGATCCGGCGGAAACGTCGGCGCCCCGCAAGGGGCCTGGCCACAGGTGTTGCATGGCTGTCGTCAGCTCGTGTCGTGAGATGTTGGGTTAAGTCCCGCAACGAGCGCAACCC	GGATTAGATACCCCGGTAGTCCTAGCCGTAAACGATGGACACTAGGTGTTGGTGGTATCAACCCCACCAGTGCCGTAGCTAACGCATTAAGTGTCCCGCCTGGGGAGTACGGCCGCAAGGCTAAAACTCAAAGGAATTGACGGGGGCCCGCACAAGCAGCGGAGCGTGGGGTTTAATTCGACGCAACGCGAAGAACCTTACCAGGGCTTGACATGACCAGGGATCCGGCGGAAACGTCGGCGCCCCGCAAGGGGCCTGGCCACAGGTGTTGCATGGCTGTCGTCAGCTCGTGTCGTGAGATGTTGGGTTAAGTCCCGCAACGAGCGCAACCC	0	0	0	0	0	0	1	0	0	0	1	0.25	0	1	0	2	3	0.75	21	9	12	41	83	20.75	32
Bacteria_MS_1	S	2	2	Aged_1_106226	99.399	100	N	Hydrogenobacter_subterraneus;Thermothrix_azorensis	16SMicrobial|NR_024729.1;16SMicrobial|NR_104832.1	-	-	-	-	-	Bacteria	Bacteria_MS	Bacteria_MS	Bacteria_MS	Bacteria_MS	Bacteria_MS	Bacteria_MS	Aged_1_106226;Aged_1_57654;Aged_1_137925;Aged_1_44744	GGATTAGATACCCGGGTAGTCCCAGCCGTAAACCATGGGCGCTAGACGTCGTCCGCAAGGGCGGTGTCTCAGCTAACGCGTTAAGCGCCCCGCCTGGGGAGTACGGGCGCAAGCCTGAAACTCAAAGGAATTGGCGGGGGCCCGCACAACCGGTGGAGCGTCTGGTTCAATTCGATGCTAACCGAAAAACCTTACCCGGGTTTGACATGATGGGAAACCTCTGCGAAAGCGGAGGGTGCCGTCCTCTGGACGGAATCCCATCACAGGTGGTGCATGGCCGTCGTCAGCTCGTGTCGTGAGATGTTGGGTTAAGTCCCGCAACGAGCGCAACCC	GGATTAGATACCCGGGTAGTCCCAGCCGTAAACCATGGGCGCTAGACGTCGTCCGTAAGGGCGGTGTCTCAGCTAACGCGTTAAGCGCCCCGCCTGGGGAGTACGGGCGCAAGCCTGAAACTCAAAGGAATTGGCGGGGGCCCGCACAACCGGTGGAGCGTCTGGTTCAATTCGATGCTAACCGAAAAACCTTACCCGGGCTTGACATGATGGGAAACCTCTGCGAAAGCGGAGGGTGCCGTCCTCTGGACGGAATCCCATCACAGGTGGTGCATGGCCGTCGTCAGCTCGTGTCGTGAGATGTTGGGTTAAGTCCCGCAACGAGCGCAACCC	0	1	0	0	1	0.25	20	35	11	27	93	23.25	15	44	31	36	126	31.5	10	2	2	10	24	6	8
Bacteria_MS_10	S	1	7	Aged_3_129664	100	100	N	Bacillales_circulans;Bacillales_firmus;Bacillales_siralis;Bacillus_circulans;Bacillus_firmus;Bacillus_siralis;Desulfovibrio_vulgaris	nt|EF636893.1;nt|HM030743.1;nt|KP282785.1;nt|KY698020.1;silva|EF636893.1.1151;silva|HM030743.1.1542;silva|KP282785.1.1420;silva|KX767127.1.1471	-	-	-	-	-	Bacteria	Bacteria_MS	Bacteria_MS	Bacteria_MS	Bacteria_MS	Bacteria_MS	Bacteria_MS	Aged_4_105329;Aged_3_129664;Aged_4_116596;Aged_1_84135	GGATTAGATACCCTGGTAGTCCACGCCGTAAACGATGAGTGCTAAGTGTTAGAGGGTTTCCGCCCTTTAGTGCTGCAGCAAACGCATTAAGCACTCCGCCTGGGGAGTACGGCCGCAAGGCTGAAACTCAAAGGAATTGACGGGGGCCCGCACAAGCGGTGGAGCATGTGGTTTAATTCGAAGCAACGCGAAGAACCTTACCAGGTCTTGACATCCTCTGCCACCCCTAGAGATAGGGCGTTCCCCTTCGGGGGACGGAGTGACAGGTGGTGCATGGTTGTCGTCAGCTCGTGTCGTGAGATGTTGGGTTAAGTCCCGCAACGAGCGCGACCC	GGATTAGATACCCTGGTAGTCCACGCCGTAAACGATGAGTGCTAAGTGTTAGAGGGTTTCCGCCCTTTAGTGCTGCAGCAAACGCATTAAGCACTCCGCCTGGGGAGTACGGCCGCAAGGCTGAAACTCAAAGGAATTGACGGGGGCCCGCACAAGCGGTGGAGCATGTGGTTTAATTCGAAGCAACGCGAAGAACCTTACCAGGTCTTGACATCCTCTGCCACCCCTAGAGATAGGGCGTTCCCCTTCGGGGGACGGAGTGACAGGTGGTGCATGGTTGTCGTCAGCTCGTGTCGTGAGATGTTGGGTTAAGTCCCGCAACGAGCGCAACCC	0	0	0	0	0	0	1	0	0	1	2	0.5	3	0	1	1	5	1.25	9	18	23	11	61	15.25	20
Bacteria_MS_5	S	1	5	Litter_1_193389	99.696	100	N	Cellulosimicrobium_cellulans;Hydrogenophaga_atypica;Microbacterium_arborescens;Microbacterium_ginsengisoli;Microbacterium_imperiale	nt|AY238940.1;nt|HM209726.1;nt|HQ326998.1;nt|MG011577.1;nt|MG011578.1;silva|AY238940.1.1229;silva|HM209726.1.1394;silva|HQ326998.1.1431	-	-	-	-	-	Bacteria	Bacteria_MS	Bacteria_MS	Bacteria_MS	Bacteria_MS	Bacteria_MS	Bacteria_MS	Litter_1_193389;Litter_1_159814;Litter_1_112253;Litter_1_119211	GGATTAGATACCCTGGTAGTCCACCCCGTAAACGTTGGGAACTAGTTGTGGGGTCCATTCCACGGATTCCGTGACGTAGCTAACGCATTAAGTTCCCCGCCTGGGGAGTACGGCCGCAAGGCTAAAACTCAAAGGAATTGACGGGGACCCGCACAAGCGGCGGAGCATGCGGATTAATTCGATGCAACGCGAAGAACCTTACCAAGGCTTGACATATAGAGGAAACGGCTGGAAACAGTCGCCCCGCAAGGTCTCTATACAGGTGGTGCATGGTTGTCGTCAGCTCGTGTCGTGAGATGTTGGGTTAAGTCCCGCAACGAGCGCAACCC	GGCTTAGATACCCTGGTAGTCCACCCCGTAAACGTTGGGAACTAGTTGTGGGGTCCATTCCACGGATTCCGTGACGCAGCTAACGCATTAAGTTCCCCGCCTGGGGAGTACGGCCGCAAGGCTAAAACTCAAAGGAATTGACGGGGACCCGCACAAGCGGCGGAGCATGCGGATTAATTCGATGCAACGCGAAGAACCTTACCAAGGCTTGACATATAGAGGAAACGGCTGGAAACAGTCGCCCCGCAAGGTCTCTATACAGGTGGTGCATGGTTGTCGTCAGCTCGTGTCGTGAGATGTTGGGTTAAGTCCCGCAACGAGCGCAACCC	0	0	0	0	0	0	0	0	0	0	0	0	0	9	0	1	10	2.5	26	25	36	31	118	29.5	37
Bacteroidales_1	O	1	0	Aged_2_150868	99.387	100	N	Bacteroidales	nt|JN540101.1;rdp|S003204686;silva|JN540101.1.1448	-	-	-	-	-	Bacteria	Bacteroidetes	Bacteroidia	Bacteroidales	Bacteroidales	Bacteroidales	Bacteroidales	Aged_2_150868;Aged_4_105421	GGATTAGATACCCTGGTAGTCCACGCCGTAAACGATGATCACTCGCTGTTAGCGATACACAGTTAGCGGCTAAGCAAAAGCATTAAGTGATCCACCTGGGGAGTACGGCCGCAAGGCTGAAACTCAAAGGAATTGACGGGGGCCCGCACAAGCGGAGGAACATGTGGTTTAATTCGATGATACGCGAGGAACCTTACCTGGGCTTAAATGTTGAGTGCATGAGGTGGAAACACTTCTTCCCTTCGGGGCTCTCAGCAAGGTGCTGCATGGTTGTCGTCAGCTCGTGCCGTGAGGTGTCGGGTTAAGTCCCATAACGAGCGCAACCC	GGATTAGATACCCTGGTAGTCCACGCCGTAAACGATGATCACTCGCTGTTAGCGATACACAGTTAGCGGCTAAGCAAAAGCATTAAGTGATCCACCTGGGGAGTACGGCCGCAAGGCTGAAACTCAAAGGAATTGACGGGGGCCCGCACAAGCGGAGGAACATGTGGTTTAATTCGATGATACGCGAGGAACCTTACCTGGGCTTAAATGTTGAGTGCATGAGGTAGAAATACTTCTTCCCTTCGGGGCTCTCAGCAAGGTGCTGCATGGTTGTCGTCAGCTCGTGCCGTGAGGTGTCGGGTTAAGTCCCATAACGAGCGCAACCC	1	0	0	0	1	0.25	0	0	0	0	0	0	3	0	1	2	6	1.5	41	51	50	53	195	48.75	24
Bacteroidales_2	O	1	0	Compost_1_108908	99.693	100	N	Bacteroidales	rdp|S000502082;silva|AY426437.1.1444	-	-	-	-	-	Bacteria	Bacteroidetes	Bacteroidia	Bacteroidales	Bacteroidales	Bacteroidales	Bacteroidales	Compost_1_120441;Compost_1_112736;Compost_1_108908;Compost_1_138384	GGCTTAGATACCCTGGTAGTCCACGCTGTAAACGATGATCACTCGTTGTTGGCGATACACCGTCAGCGACTGAGCGAAAGCAATAAGTGATCCACCTGGGGAGTACGGTCGCAAGACTGAAACTCAAAGGAATTGACGGGGGCCCGCACAAGCGGAGGAACATGTGGTTTAATTCGATGATACGCGAGGAACCTTACCTGGGCTTGAAAGGGGAACGACCTCCCGGGAAACCGGGATTCTCTTCGGAGCGTTCTCCTAGGTGCTGCATGGTTGTCGTCAGCTCGTGCCGTGAGGTGTCGGGTTAAGTCCCATAACGAGCGCAACCC	GGATTAGATACCCTGGTAGTCCACGCCGTAAACGATGATCACTCGTTGTTGGCGATACACCGTCAGCGACTGAGCGAAAGCAATAAGTGATCCACCTGGGGAGTACGGTCGCAAGACTGAAACTCAAAGGAATTGACGGGGGCCCGCACAAGCGGAGGAACATGTGGTTTAATTCGATGATACGCGAGGAACCTTACCTGGGCTTGAAAGGGGAACGACCTCCCGGGAAACCGGGATTCTCTTCGGAGCGTTCTCCTAGGTGCTGCATGGTTGTCGTCAGCTCGTGCCGTGAGGTGTCGGGTTAAGTCCCATAACGAGCGCAACCC	0	0	0	0	0	0	1	1	2	1	5	1.25	18	13	8	27	66	16.5	421	402	493	487	1803	450.75	164
Bacteroidales_3	O	1	0	Aged_1_118545	99.387	100	N	Bacteroidales	rdp|S000928417;silva|AB330852.1.1119	-	-	-	-	-	Bacteria	Bacteroidetes	Bacteroidia	Bacteroidales	Bacteroidales	Bacteroidales	Bacteroidales	Aged_1_111711;Aged_1_118545;Aged_1_5108;Aged_1_103459;Aged_1_111467	GGATTAGATACCCTGGTAGTCCACGCCCTAAACGATGATCACTCGCTGTTGGCGACATACTGTCAGCGGCTAAGCGAAAGCATTAAGTGATCCACCTGGGGAGTACGCTCGCAAGAGTGAAACTCAAAGGAATTGACGGGGGCCCGCACAAGCGGAGGAACATGTGGTTTAATTCGATGATACGCGAGGAACCTTACCTGGGCTCGAACGTAGGACGACGTCACGTGAAAGCGTGATTCCCTTCGGGGCGGCCTACGAGGTGCTGCATGGTTGTCGTCAGCTCGTGCCGTGAGGTGTCGGATTAAGTTCCATAACGAGCGCAACCC	GGATTAGATACCCTGGTAGTCCACGCCCTAAACGATGATCACTCGCTGTTGGCGACATACTGTCAGCGGCTAAGCGAAAGCATTAAGTGATCCACCTGGGGAGTACGCTCGCAAGAGTGAAACTCAAAGGAATTGACGGGGGCCCGCACAAGCGGAGGAACATGTGGTTTAATTCGATGATACGCGAGGAACCTTACCTGGGCTCGAACGTAGGACGACGTCCCGTGAAAGCGGGATTCCCTTCGGGGCGGCCTACGAGGTGCTGCATGGTTGTCGTCAGCTCGTGCCGTGAGGTGTCGGATTAAGTTCCATAACGAGCGCAACCC	0	0	0	0	0	0	1	2	0	0	3	0.75	7	3	0	0	10	2.5	38	30	11	20	99	24.75	13
Bacteroidales_4	O	2	0	Aged_1_105786	99.693	100	N	Bacteroidales	rdp|S001377367;silva|FJ484215.1.759	-	-	-	-	-	Bacteria	Bacteroidetes	Bacteroidia	Bacteroidales	Bacteroidales	Bacteroidales	Bacteroidales	Aged_1_145296;Aged_1_103806;Aged_1_105786;Aged_1_151449;Aged_1_102325;Aged_1_149353;Aged_1_13125;Aged_1_120327	GGATTAGATACCCTGGTAGTCCACGCTGTAAACGATGATCACTCGTTGTTGGCGATATACCGTCAGCGACTGAGCGAAAGCAATAAGTGATCCACCTGGGGAGTACGGCGGCAACGCTGAAACTCAAAGGAATTGACGGGGGCCCGCACAAGCGGAGGAACATGTGGTTTAATTCGATGATACGCGAGGAACCTTACCTGGGCTTGAAAGGGGATCGACCTCCCGGGAAACCGGGATTCTCTTCGGAGCGGTCTCCTAGGTGCTGCATGGTTGTCGTCAGCTCGTGCCGTGAGGTGTCGGGTTAAGTCCCATAACGAGCGCAACCC	GGATTAGATACCCTGGTAGTCCACGCTGTAAACGATGATCACTCGTTGTTGGCGATACACCGTCAGCGACTGAGCGAAAGCAATAAGTGATCCACCTGGGGAGTACGGCGGCAACGCTGAAACTCAAAGGAATTGACGGGGGCCCGCACAAGCGGAGGAACATGTGGTTTAATTCGATGATACGCGAGGAACCTTACCTGGGCTTGAAAGGGGATCGACCTCCCGGGAAACCGGGATTCTCTTCGGAGCGGTCTCCTAGGTGCTGCATGGTTGTCGTCAGCTCGTGCCGTGAGGTGTCGGGTTAAGTCCCATAACGAGCGCAACCC	0	0	0	0	0	0	1	0	1	2	4	1	5	1	9	5	20	5	9	4	9	4	26	6.5	0
Bacteroidales_5	O	1	0	Aged_2_107808	100	100	N	Bacteroidales	rdp|S001377815;silva|FJ484663.1.1328	-	-	-	-	-	Bacteria	Bacteroidetes	Bacteroidia	Bacteroidales	Bacteroidales	Bacteroidales	Bacteroidales	Aged_2_107808	GGATTAGATACCCTGGTAGTCCACGCCGTAAACGATGATCACTCGCTGTTAGCGATACACAGTTAGCGGCTAAGCAAAAGCATTAAGTGATCCACCTGGGGAGTACGGCCGCAAGGCTGAAACTCAAAGGAATTGACGGGGGCCCGCACAAGCGGAGGAACATGTGGTTTAATTCGATGATACGCGAGGAACCTTACCTGGGCTTAAATGTAGAGTGCATTCCCGAGAAATCGGGATTTTCTTCGGAACTCTTTGCAAGGTGCTGCATGGTTGTCGTCAGCTCGTGCCGTGAGGTGTCGGGTTAAGTCCCATAACGAGCGCAACCC	GGATTAGATACCCTGGTAGTCCACGCCGTAAACGATGATCACTCGCTGTTAGCGATACACAGTTAGCGGCTAAGCAAAAGCATTAAGTGATCCACCTGGGGAGTACGGCCGCAAGGCTGAAACTCAAAGGAATTGACGGGGGCCCGCACAAGCGGAGGAACATGTGGTTTAATTCGATGATACGCGAGGAACCTTACCTGGGCTTAAATGTAGAGTGCATTCCCGAGAAATCGGGATTTTCTTCGGAACTCTTTGCAAGGTGCTGCATGGTTGTCGTCAGCTCGTGCCGTGAGGTGTCGGGTTAAGTCCCATAACGAGCGCAACCC	0	0	1	0	1	0.25	45	12	91	177	325	81.25	36	27	11	3	77	19.25	2	1	1	3	7	1.75	0
Bacteroidales_6	O	1	0	Aged_2_18172	99.693	100	N	Bacteroidales	rdp|S004526448;silva|KP281021.1.723	-	-	-	-	-	Bacteria	Bacteroidetes	Bacteroidia	Bacteroidales	Bacteroidales	Bacteroidales	Bacteroidales	Aged_4_130388;Compost_1_87772;Aged_2_18172	GGCTTAGATACCCTGGTAGTCCACGCTGTAAACGATGATCACTCGTTGTTGGCGATATACCGTCAGCGACTGAGCGAAAGCAATAAGTGATCCACCTGGGGAGTACGGCGGCAACGCTGAAACTCAAAGGAATTGACGGGGGCCCGCACAAGCGGAGGAACATGTGGTTTAATTCGATGATACGCGAGGAACCTTACCTGGGCTTGAAAGGGGAATGACCTCCCGGGAAACCGGGATTCTCTTCGGAGCATTCTCCTAGGTGCTGCATGGTTGTCGTCAGCTCGTGCCGTGAGGTGTCGGGTTAAGTCCCATAACGAGCGCAACCC	GGATTAGATACCCAAGTAGTCCACGCTGTNAACGATGATCACTCGTTGTTGGCGATATACCGTCAGCGACTGAGCGAAAGCAATAAGTGATCCACCTGGGGAGTACGGCGGCAACGCTGAAACTCAAAGGAATTGACGGGGGCCCGCACAAGCGGAGGAACATGTGGTTTAATTCGATGATACGCGAGGAACCTTACCTGGGCTTGAAAGGGGAATGACCTCCCGGGAAACCGGGATTCTCTTCGGAGCATTCTCCTAGGTGCTGCATGGTTGTCGTCAGCTCGTGCCGTGAGGTGTCGGGTTAAGTCCCAAAACGAGCGAAACCC	0	0	0	0	0	0	1	52	115	15	183	45.75	4	10	8	2	24	6	27	5	4	3	39	9.75	10
Bacteroidetes_MG_1	G	1	2	Aged_3_157588	100	100	N	Bacteroides;Cytophaga	nt|AY910849.1;nt|KC502889.1	-	-	-	-	-	Bacteria	Bacteroidetes	Bacteroidetes_MG	Bacteroidetes_MG	Bacteroidetes_MG	Bacteroidetes_MG	Bacteroidetes_MG	Aged_3_157588;Aged_3_43260	GGATTAGATACCCTGGTAGTCCACGCCGTAAACGATGATTACTCGCTGTTGGCGATACACTGTCAGCGGCTAAGCAAAAGCAATAAGTAATCCACCTGGGGAGTACGGCCGCAAGGTTGAAACTCAAAGGAATTGACGGGGGCCCGCACAAGCGGAGGAACATGTGGTTTAATTCGATGATACGCGAGGAACCTTACCTGGGCTTAAATGTAGAGTGCATTTTCTAGAGATAGGAATTCCCTTCGGGGCTTTCTGCAAGGTGCTGCATGGTTGTCGTCAGCTCGTGCCGTGAGGTGTCGGGTTAAGTCCCATAACGAGCGCAACCC	GGATTAGATACCCTGGTAGTCCACGCCGTAAACGATGATTACTCGCTGTTGGCGATACACTGTCAGCGGCTAAGCAAAAGCAATAAGTAATCCACCTGGGGAGTACGGCCGCAAGGTTGAAACTCAAAGGAATTGACGGGGGCCCGCACAAGCGGAGGAACATGTGGTTTAATTCGATGATACGCGAGGAACCTTACCTGGGCTTAAATGTAGAGTGCATTTTCTAGAGATAGGAATTCCCTTCGGGGCTTTCTGCAAGGTGCTGCATGGTTGTCGTCAGCTCGTGCCGTGAGGTGTCGGGTTAAGTCCCATAACGAGCGCAACCC	0	0	0	0	0	0	1	2	1	1	5	1.25	5	2	3	0	10	2.5	11	4	31	14	60	15	14
Bacteroidia_1	C	1	0	Litter_1_39934	100	100	N	Bacteroidia	silva|AM930294.1.1485	-	-	-	-	-	Bacteria	Bacteroidetes	Bacteroidia	Bacteroidia	Bacteroidia	Bacteroidia	Bacteroidia	Litter_1_152435;Litter_1_39934	GGCTTAGATACCCTGGTAGTCCACACCGTAAACGATGATTACTAGATTTTGGCCGTAAGGTCAGAGTCCAAGCGAAAGTGTTTAGTAATCCACCTGGGGAGTACGTCCGCAAGGATGAAACTCAAAGGAATTGACGGGGGCCCGCACAAGCGGTGGAGCATGTGGTTTAATTCGATGATACGCGAGGAACCTTACCTGGGCTTGAAAGTTAGTGACCGCTTCTGAAAGGGAGTTTTCCGCAAGGACACGAAACTAGGTGCTGCATGGCTGTCGTCAGCTCGTGCCGTGAGGTGTCGGATTAAGTTCCATAACGAGCGCAACCC	GGATTAGATACCCTGGTAGTCCACACCGTAAACGATGATTACTAGATTTTGGCCGTAAGGTCAGAGTCCAAGCGAAAGTGTTTAGTAATCCACCTGGGGAGTACGTCCGCAAGGATGAAACTCAAAGGAATTGACGGGGGCCCGCACAAGCGGTGGAGCATGTGGTTTAATTCGATGATACGCGAGGAACCTTACCTGGGCTTGAAAGTTAGTGACCGCTTCTGAAAGGGAGTTTTCCGCAAGGACACGAAACTAGGTGCTGCATGGCTGTCGTCAGCTCGTGCCGTGAGGTGTCGGATTAAGTTCCATAACGAGCGCAACCC	0	0	0	0	0	0	1	0	0	0	1	0.25	1	1	1	1	4	1	11	10	18	12	51	12.75	64
Bacteroidia_2	C	3	0	Litter_1_101197	100	100	N	Bacteroidia	silva|EF174261.1.1480	-	-	-	-	-	Bacteria	Bacteroidetes	Bacteroidia	Bacteroidia	Bacteroidia	Bacteroidia	Bacteroidia	Litter_1_100067;Litter_1_100850;Litter_1_101197;Litter_1_101743;Litter_1_10008;Litter_1_111388;Litter_1_100154;Litter_1_101612	GGATTAGATACCCTGGTAGTCCACGCCGTAAACGATGATCACTCGCTGTTGGCGATACACAGTCAGCGGCCAAGCGAAAGCGATAAGTGATCCACCTGGGGAGTACGATCGCAAGGTTGAAACTCAAAGGAATTGACGGGGGCCCGCACAAGCGGTGGAGCATGTGGTTTAATTCGATGATACGCGAGGAACCTTACCAAGGCTTGAAAGGCATTCGACAGATCAGGAAACTGGTCGTTCTTCGGACGGATGTCTAGGTGCTGCATGGCTGTCGTCAGCTCGTGCCGTGAGGTGTTGGGTTAAGTCCCGCAACGAGCGCAACCC	GGATTAGATACCCTGGTAGTCCACGCCGTAAACGATGATCACTCGCTGTTGGCGATACACAGTCAGCGGCCAAGCGAAAGCGATAAGTGATCCACCTGGGGAGTACGATCGCAAGGTTGAAACTCAAAGGAATTGACGGGGGCCCGCACAAGCGGTGGAGCATGTGGTTTAATTCGATGATACGCGAGGAACCTTACCAAGGCTTGAAAGGCATTCGACAGATCAGGAAACTGGTCGTTCTTCGGACGGATGTCTAGGTGCTGCATGGCTGTCGTCAGCTCGTGCCGTGAGGTGTTGGGTTAAGTCCCGCAACGAGCGCAACCC	14	1	2	4	21	5.25	18	9	16	13	56	14	6	11	13	15	45	11.25	10	14	3	13	40	10	10
Bacteroidia_3	C	1	0	Compost_1_11099	100	100	N	Bacteroidia	silva|FJ801215.1.1489	-	-	-	-	-	Bacteria	Bacteroidetes	Bacteroidia	Bacteroidia	Bacteroidia	Bacteroidia	Bacteroidia	Compost_1_11099	GGATTAGATACCCTGGTAGTCCACGCCCTAAACGATGATAACTCGTTGTTGGCGATACACAGTCAGCGACTAAGCGAAAGCATTAAGTTATCCACCTGGGGAGTACGACCGCAAGGTTGAAACTCAAAGGAATTGACGGGGGCCCGCACAAGCGGAGGAGCATGTGGTTTAATTCGATGATACGCGAGGAACCTTACCTGGGCTTGAAAGTTAGTGACATTCTGTGAAAGCAGAACTTCCGCAAGGACACGAAACTAGGTGCTGCATGGCTGTCGTCAGCTCGTGCCGTGAGGTGTTGGGTTAAGTCCCGTAACGAGCGCAACCC	GGATTAGATACCCTGGTAGTCCACGCCCTAAACGATGATAACTCGTTGTTGGCGATACACAGTCAGCGACTAAGCGAAAGCATTAAGTTATCCACCTGGGGAGTACGACCGCAAGGTTGAAACTCAAAGGAATTGACGGGGGCCCGCACAAGCGGAGGAGCATGTGGTTTAATTCGATGATACGCGAGGAACCTTACCTGGGCTTGAAAGTTAGTGACATTCTGTGAAAGCAGAACTTCCGCAAGGACACGAAACTAGGTGCTGCATGGCTGTCGTCAGCTCGTGCCGTGAGGTGTTGGGTTAAGTCCCGTAACGAGCGCAACCC	2	0	0	0	2	0.5	113	9	49	130	301	75.25	269	205	173	84	731	182.75	48	66	135	172	421	105.25	56
Bacteroidia_4	C	1	0	Compost_2_129744	99.692	100	N	Bacteroidia	silva|KC331414.1.1485	-	-	-	-	-	Bacteria	Bacteroidetes	Bacteroidia	Bacteroidia	Bacteroidia	Bacteroidia	Bacteroidia	Compost_2_129744	GGATTAGATACCCTGGTAGTCCACGCCGTAAACGATGATAACTCGACGTTGGCAATATACCGTTCAGCGTCCAAGCGAAAGCGTTAAGTTATCCACCTGGGGAGTACGATCGCAAGGTTGAAACTCAAAGGAATTGACGGGGGCCCGCACAAGCGGTGGAGCATGTGGTTTAATTCGATGATACGCGAGGAACCTTACCAGGGCTTAAATGGGGATTGACAGGCTGGGAAACTAGCCCTCCTTCGGGCAATCTTCAAGGTGCTGCATGGTTGTCGTCAGCTCGTGCCGTGAGGTGTTGGGTTAAGTCCCGCAACGAGCGCAACCC	GGATTAGATACCCTGGTAGTCCACGCCGTAAACGATGATAACTCGACGTTGGCAATATACCGTTCAGCGTCCAAGCGAAAGCGTTAAGTTATCCACCTGGGGAGTACGATCGCAAGGTTGAAACTCAAAGGAATTGACGGGGGCCCGCACAAGCGGTGGAGCATGTGGTTTAATTCGATGATACGCGAGGAACCGTACCAGGGCTTAAATGGGGATTGACAGGCTGGGAAACTAGCCCTCCTTCGGGCAATCTTCAAGGTGCTGCATGGTTGTCGTCAGCTCGTGCCGTGAGGTGTTGGGTTAAGTCCCGCAACGAGCGCAACCC	0	0	0	0	0	0	1	0	0	0	1	0.25	1	0	5	3	9	2.25	21	17	23	31	92	23	19
Bauldia_1	G	4	0	Aged_1_146131	100	100	N	Bauldia	rdp|S000557799;silva|DQ083106.1.1446	-	-	-	-	-	Bacteria	Proteobacteria	Alphaproteobacteria	Rhizobiales	Rhizobiales	Bauldia	Bauldia	Aged_1_146131	GGCTTAGATACCCTGGTAGTCCACGCCGTAAACGATGGATGCTAGCCGTCGGTGGGCATGCCCTTCGGTGGCGCAGCTAACGCAATAAGCATCCCGCCTGGGGAGTACGATCGCAAGATTAAAACTCAAAGGAATTGACGGGGGCCCGCACAAGCGGTGGAGCATGTGGTTCAATTCGAAGCAACGCGAAGAACCTTACCAGGCCTTGACATCCCGGTCGCGGGCCCCTGAAAGGGGGCCTTTCAGTTCGGCTGGACCGGTGACAGGTGCTGCATGGCTGTCGTCAGCTCGTGTCGTGAGATGTTGGGTTAAGTCCCGCAACGAGCGCAACCC	GGATTAGATACCCTGGTAGTCCACGCCGTAAACGATGGATGCTAGCCGTCGGTGGGCATGCCCTTCGGTGGCGCAGCTAACGCAATAAGCATCCCGCCTGGGGAGTACGATCGCAAGATTAAAACTCAAAGGAATTGACGGGGGCCCGCACAAGCGGTGGAGCATGTGGTTCAATTCGAAGCAACGCGAAGAACCTTACCAGGCCTTGACATCCCGGTCGCGGGCCCCTGAAAGGGGGCCTTTCAGTTCGGCTGGACCGGTGACAGGTGCTGCATGGCTGTCGTCAGCTCGTGTCGTGAGATGTTGGGTTAAGTCCCGCAACGAGCGCAACCC	20	43	0	3	66	16.5	29	38	46	20	133	33.25	10	11	13	90	124	31	4	4	12	2	22	5.5	12
Bauldia_10	G	1	0	Compost_1_12648	100	100	N	Bauldia	silva|FQ658946.1.1306	-	-	-	-	-	Bacteria	Proteobacteria	Alphaproteobacteria	Rhizobiales	Rhizobiales	Bauldia	Bauldia	Compost_1_144761;Compost_1_12648	GGCTTAGATACCCTGGTAGTCCACGCCGTAAACGATGAATGCTAGCCGTCGGTGGGCATGCCCTTCGGTGGCGCAGCTAACGCATTAAGCATTCCGCCTGGGGAGTACGATCGCAAGATTAAAACTCAAAGGAATTGACGGGGGCCCGCACAAGCGGTGGAGCATGTGGTTCAATTCGAAGCAACGCGAAGAACCTTACCAGGCCTTGACATCCCGGTCGCGGCCCCTTGAAAGAGGGGCCTTCAGTTCGGCTGGACCGGTGACAGGTGCTGCATGGCTGTCGTCAGCTCGTGTCGTGAGATGTTGGGTTAAGTCCCGCAACGAGCGCAACCC	GGATTAGATACCCTGGTAGTCCACGCCGTAAACGATGAATGCTAGCCGTCGGTGGGCATGCCCTTCGGTGGCGCAGCTAACGCATTAAGCATTCCGCCTGGGGAGTACGATCGCAAGATTAAAACTCAAAGGAATTGACGGGGGCCCGCACAAGCGGTGGAGCATGTGGTTCAATTCGAAGCAACGCGAAGAACCTTACCAGGCCTTGACATCCCGGTCGCGGCCCCTTGAAAGAGGGGCCTTCAGTTCGGCTGGACCGGTGACAGGTGCTGCATGGCTGTCGTCAGCTCGTGTCGTGAGATGTTGGGTTAAGTCCCGCAACGAGCGCAACCC	23	9	17	5	54	13.5	56	46	23	34	159	39.75	20	50	22	21	113	28.25	10	14	25	28	77	19.25	19
Bauldia_2	G	1	0	Aged_3_91225	100	100	N	Bauldia	rdp|S001164482;silva|FJ152785.1.1444	-	-	-	-	-	Bacteria	Proteobacteria	Alphaproteobacteria	Rhizobiales	Rhizobiales	Bauldia	Bauldia	Compost_1_127165;Compost_1_151765;Aged_3_91225;Compost_1_119134;Compost_1_139774;Compost_1_154034;Aged_3_43572;Aged_4_12926	GGATTAGATACCCTGGTAGTCCACGCCGTAAACGATGAATGCTAGCCGTCGGTGGGCATGCCCTTCGGTGGCGCAGCTAACGCAATAAGCATTCCGCCTGGGGAGTACGATCGCAAGATTAAAACTCAAAGGAATTGACGGGGGCCCGCACAAGCGGTGGAGCATGTGGTTCAATTCGAAGCAACGCGAAGAACCTTACCAGGCCTTGACATCCCGGTCGCGGGTCCCTGAAAGGGGACCTTTCAGTTCGGCTGGACCGGTGACAGGTGCTGCATGGCTGTCGTCAGCTCGTGTCGTGAGATGTTGGGTTAAGTCCCGCAACGAGCGCAACCC	GGATTAGATACCCTGGTAGTCCACGCCGTAAACGATGAATGCTAGCCGTCGGTGGGCATGCCCTTCGGTGGCGCAGCTAACGCAATAAGCATTCCGCCTGGGGAGTACGATCGCAAGATTAAAACTCAAAGGAATTGACGGGGGCCCGCACAAGCGGTGGAGCATGTGGTTCAATTCGAAGCAACGCGAAGAACCTTACCAGGCCTTGACATCCCGGTCGCGGGTCCCTGAAAGGGGACCTTTCAGTTCGGCTGGACCGGTGACAGGTGCTGCATGGCTGTCGTCAGCTCGTGTCGTGAGATGTTGGGTTAAGTCCCGCAACGAGCGCAACCC	0	0	0	0	0	0	0	0	0	0	0	0	0	0	0	0	0	0	1	6	1	5	13	3.25	4
Bauldia_3	G	1	0	Aged_1_152247	99.099	100	N	Bauldia	rdp|S001164500;silva|FJ152803.1.1455	-	-	-	-	-	Bacteria	Proteobacteria	Alphaproteobacteria	Rhizobiales	Rhizobiales	Bauldia	Bauldia	Aged_1_102159;Aged_1_152247;Aged_1_116044;Aged_1_131377;Aged_1_152002	GGATTAGATACCCTGGTAGTCCACGCCGTAAACGATGAATGCTAGCCGTCGGTGAGCATGCTCATCGGTGGCGCAGCCAACGCAATAAGCATTCCGCCTGGGGAGTACGGTCGCAAGACTAAAACTCAAAGGAATTGACGGGGGCCCGCACAAGCGGTGGAGCATGTGGTTCAATTCGAAGCAACGCGAAGAACCTTACCAGGCCTTGACATCCCGGTCGCGGCCCCTTGAAAGAGGGGCTTTCAGTTCGGCTGGACCGGTGACAGGTGCTGCATGGCTGTCGTCAGCTCGTGTCGTGAGATGTTGGGTTAAGTCCCGCAACGAGCGCAACCC	GGATTAGATACCCTGGTAGTCCACGCCGTAAACGATGAATGCTAGCCGTCGGTGAGCATGCTCATCGGTGGCGCAGCCAACGCAATAAGCATTCCGCCTGGGGAGTACGATCGCAAGATTAAAACTCAAAGGAATTGACGGGGGCCCGCACAAGCGGTGGAGCATGTGGTTCAATTCGAAGCAACGCGCAGAACCTTACCAGGCCTTGACATCCCGGTCGCGGCCCCTTGAAAGAGGGGCTTTCAGTTCGGCTGGACCGGTGACAGGTGCTGCATGGCTGTCGTCAGCTCGTGTCGTGAGATGTTGGGTTAAGTCCCGCAACGAGCGCAACCC	0	0	0	0	0	0	2	0	0	0	2	0.5	1	0	0	1	2	0.5	38	47	94	53	232	58	87
Bauldia_4	G	1	0	Aged_1_4624	100	100	N	Bauldia	rdp|S001994229;silva|FQ659318.1.1309	-	-	-	-	-	Bacteria	Proteobacteria	Alphaproteobacteria	Rhizobiales	Rhizobiales	Bauldia	Bauldia	Aged_1_4624;Aged_2_128170;Aged_3_160476;Aged_1_16862	GGATTAGATACCCTGGTAGTCCACGCCGTAAACGATGAATGCTAGCCGTCGGTGAGCATGCTCTTCGGTGGCGCAGCCAACGCAATAAGCATTCCGCCTGGGGAGTACGATCGCAAGATTAAAACTCAAAGGAATTGACGGGGGCCCGCACAAGCGGTGGAGCATGTGGTTCAATTCGAAGCAACGCGCAGAACCTTACCAGGCCTTGACATCCCGGTCGCGGCCCCTTGAAAGAGGGGCCTTCAGTTCGGCTGGACCGGTGACAGGTGCTGCATGGCTGTCGTCAGCTCGTGTCGTGAGATGTTGGGTTAAGTCCCGCAACGAGCGCAACCC	GGATTAGATACCCTGGTAGTCCACGCCGTAAACGATGAATGCTAGCCGTCGGTGAGCATGCTCTTCGGTGGCGCAGCCAACGCAATAAGCATTCCGCCTGGGGAGTACGATCGCAAGATTAAAACTCAAAGGAATTGACGGGGGCCCGCACAAGCGGTGGAGCATGTGGTTCAATTCGAAGCAACGCGCAGAACCTTACCAGGCCTTGACATCCCGGTCGCGGCCCCTTGAAAGAGGGGCCTTCAGTTCGGCTGGACCGGTGACAGGTGCTGCATGGCTGTCGTCAGCTCGTGTCGTGAGATGTTGGGTTAAGTCCCGCAACGAGCGCAACCC	0	0	0	0	0	0	0	0	0	0	0	0	0	0	0	0	0	0	9	10	24	24	67	16.75	12
Bauldia_5	G	1	0	Compost_1_178123	100	100	N	Bauldia	rdp|S002905081;silva|AB630705.1.1413	-	-	-	-	-	Bacteria	Proteobacteria	Alphaproteobacteria	Rhizobiales	Rhizobiales	Bauldia	Bauldia	Compost_1_113256;Compost_1_159718;Compost_1_178123	GGCTTAGATACCCTGGTAGTCCACGCCGTAAACGATGGATGCTAGCCGTCGGCAAGTTTACTTGTCGGTGGCGCAGCTAACGCAATAAGCATCCCGCCTGGGGAGTACGATCGCAAGATTAAAACTCAAAGGAATTGACGGGGGCCCGCACAAGCGGTGGAGCATGTGGTTTAATTCGAAGCAACGCGAAGAACCTTACCAGGCCTTGACATCCCGGTCGCGGCCCCTTGAAAGAGGGGCCTTCAGTTCGGCTGGACCGGTGACAGGTGCTGCATGGCTGTCGTCAGCTCGTGTCGTGAGATGTTGGGTTAAGTCCCGCAACGAGCGCAACCC	GGATTAGATACCCTGGTAGTCCACGCCGTAAACGATGGATGCTAGCCGTCGGCAAGTTTACTTGTCGGTGGCGCAGCTAACGCAATAAGCATCCCGCCTGGGGAGTACGATCGCAAGATTAAAACTCAAAGGAATTGACGGGGGCCCGCACAAGCGGTGGAGCATGTGGTTTAATTCGAAGCAACGCGAAGAACCTTACCAGGCCTTGACATCCCGGTCGCGGCCCCTTGAAAGAGGGGCCTTCAGTTCGGCTGGACCGGTGACAGGTGCTGCATGGCTGTCGTCAGCTCGTGTCGTGAGATGTTGGGTTAAGTCCCGCAACGAGCGCAACCC	0	0	0	0	0	0	6	0	0	4	10	2.5	1	1	4	3	9	2.25	12	10	15	11	48	12	3
Bauldia_6	G	1	0	Aged_1_19540	99.7	100	N	Bauldia	rdp|S002976138;silva|HQ120572.1.783	-	-	-	-	-	Bacteria	Proteobacteria	Alphaproteobacteria	Rhizobiales	Rhizobiales	Bauldia	Bauldia	Aged_1_19540	GGATTAGATACCCTGGTAGTCCACGCCGTAAACGATGAATGCTAGCCGTCGGTGGGCATGCCCTTCGGTGGCGCAGCTAACGCATTAAGCATTCCGCCTGGGGAGTACGATCGCAAGATTAAAACTCAAAGGAATTGACGGGGGCCCGCACAAGCGGTGGAGCATGTGGTTCAATTCGAAGCAACGCGAAGAACCTTACCAAGCTTTGACATCCCGGTCGCGGATTCCTGAAAGGGAGTCCTTCAGTTCGGCTGGACCGGTGAAAGGTGCTGCATGGCTGTCGTCAGCTCGTGTCGTGAGATGTTGGGTTAAGTCCCGCAACGAGCGCAACCC	GGATTAGATACCCTGGTAGTCCACGCCGTAAACGATGAATGCTAGCCGTCGGTGGGCATGCCCTTCGGTGGCGCAGCTAACGCATTAAGCATTCCGCCTGGGGAGTACGATCGCAAGATTAAAACTCAAAGGAATTGACGGGGGCCCGCACAAGCGGTGGAGCATGTGGTTCAATTCGAAGCAACGCGAAGAACCTTACCAAGCCTTGACATCCCGGTCGCGGATTCCTGAAAGGGAGTCCTTCAGTTCGGCTGGACCGGTGAAAGGTGCTGCATGGCTGTCGTCAGCTCGTGTCGTGAGATGTTGGGTTAAGTCCCGCAACGAGCGCAACCC	0	0	0	0	0	0	0	0	0	0	0	0	0	0	0	0	0	0	12	13	16	23	64	16	10
Bauldia_7	G	1	0	Aged_1_129484	100	100	N	Bauldia	rdp|S003453512;silva|JX133296.1.1452	-	-	-	-	-	Bacteria	Proteobacteria	Alphaproteobacteria	Rhizobiales	Rhizobiales	Bauldia	Bauldia	Aged_3_176377;Aged_1_147909;Aged_1_129484;Aged_2_14470;Aged_1_142222;Aged_1_62703;Aged_1_124107;Aged_1_118995	GGATTAGATACCCTGGTAGTCCACGCCGTAAACGATGGATGCTAGCCGTCAGCCAGCATGCTGGTTGGTGGCGCAGCTAACGCATTAAGCATCCCGCCTGGGGAGTACGATCGCAAGATTAAAACTCAAAGGAATTGACGGGGGCCCGCACAAGCGGTGGAGCATGTGGTTTAATTCGAAGCAACGCGCAGAACCTTACCAGCCCTTGACATCCCGGTCGCGGATCCCTGAGAGGGGATCTTTCAGTTCGGCTGGACCGGTGACAGGTGCTGCATGGCTGTCGTCAGCTCGTGTCGTGAGATGTTGGGTTAAGTCCCGCAACGAGCGCAACCC	GGATTAGATACCCTGGTAGTCCACGCCGTAAACGATGGATGCTAGCCGTCAGCCAGCATGCTGGTTGGTGGCGCAGCTAACGCATTAAGCATCCCGCCTGGGGAGTACGATCGCAAGATTAAAACTCAAAGGAATTGACGGGGGCCCGCACAAGCGGTGGAGCATGTGGTTTAATTCGAAGCAACGCGCAGAACCTTACCAGCCCTTGACATCCCGGTCGCGGATCCCTGAGAGGGGATCTTTCAGTTCGGCTGGACCGGTGACAGGTGCTGCATGGCTGTCGTCAGCTCGTGTCGTGAGATGTTGGGTTAAGTCCCGCAACGAGCGCAACCC	0	0	0	0	0	0	0	0	0	0	0	0	0	0	0	0	0	0	4	1	18	13	36	9	45
Bauldia_8	G	1	0	Aged_2_2982	99.399	100	N	Bauldia	rdp|S003735218;silva|JN592711.1.1313	-	-	-	-	-	Bacteria	Proteobacteria	Alphaproteobacteria	Rhizobiales	Rhizobiales	Bauldia	Bauldia	Aged_4_146684;Aged_4_75159;Aged_1_10256;Aged_2_2982;Aged_4_126335;Aged_1_119087;Aged_2_39775;Aged_2_145377	GGATTAGATACCCTGGTAGTCCACGCCGTAAACGATGGATGCTAGCCGTCGGCAAGTTTACTTGTCGGTGGCGCAGCTAACGCAATAAGCATCCCGCCTGGGGAGTACGATCGCAAGATTAAAACTCAAAGGAATTGACGGGGGCCCGCACAAGCGGTGGAGCATGTGGTTCAATTCGAAGCAACGCGAAGAACCTTACCAGGCCTTGACATCCCGGTCGCGGGCTCCTGAAAGGGGGCCTTTCAGTTCGGCTGGACCGGTGACAGGTGCTGCATGGCTGTCGTCAGCTCGTGTCGTGAGATGTTGGGTTAAGTCCCGCAACGAGCGCGACCC	GGATTAGATACCCTGGTAGTCCACGCCGTAAACGATGGATGCTAGCCGTCGGCAAGTTTACTTGTCGGTGGCGCAGCTAACGCAATAAGCATCCCGCCTGGGGAGTACGATCGCAAGATTAAAACTCAAAGGAATTGACGGGGGCCCGCACAAGCGGTGGAGCATGTGGTTCAATTCGAAGCAACGCGAAGAACCTTACCAGGCCTTGACATCCCGGTCGCGGGTTCCTGAAAGGGGACCTTTCAGTTCGGCTGGACCGGTGACAGGTGCTGCATGGCTGTCGTCAGCTCGTGTCGTGAGATGTTGGGTTAAGTCCCGCAACGAGCGCAACCC	1	0	1	1	3	0.75	7	1	15	9	32	8	8	1	7	20	36	9	2	4	2	0	8	2	0
Bauldia_9	G	1	0	Aged_1_18583	100	100	N	Bauldia	rdp|S004418152;silva|LN562385.1.1333	-	-	-	-	-	Bacteria	Proteobacteria	Alphaproteobacteria	Rhizobiales	Rhizobiales	Bauldia	Bauldia	Aged_3_118531;Aged_1_18583;Aged_1_33369;Aged_1_69871	GGATTAGATACCCTGGTAGTCCACGCCGTAAACGATGAATGCTAGCCGTCGGTGAGCATGCTCTTCGGTGGCGCAGCCAACGCAATAAGCATTCCGCCTGGGGAGTACGATCGCAAGATTAAAACTCAAAGGAATTGACGGGGGCCCGCACAAGCGGTGGAGCATGTGGTTCAATTCGAAGCAACGCGCAGAACCTTACCAGGCCTTGACATCCCGGTCGCGGCCCCTTGAAAGAGGGGCTTTCAGTTCGGCTGGACCGGTGACAGGTGCTGCATGGCTGTCGTCAGCTCGTGTCGTGAGATGTTGGGTTAAGTCCCGCAACGAGCGCAACCC	GGATTAGATACCCTGGTAGTCCACGCCGTAAACGATGAATGCTAGCCGTCGGTGAGCATGCTCTTCGGTGGCGCAGCCAACGCAATAAGCATTCCGCCTGGGGAGTACGATCGCAAGATTAAAACTCAAAGGAATTGACGGGGGCCCGCACAAGCGGTGGAGCATGTGGTTCAATTCGAAGCAACGCGCAGAACCTTACCAGGCCTTGACATCCCGGTCGCGGCCCCTTGAAAGAGGGGCTTTCAGTTCGGCTGGACCGGTGACAGGTGCTGCATGGCTGTCGTCAGCTCGTGTCGTGAGATGTTGGGTTAAGTCCCGCAACGAGCGCAACCC	0	0	0	0	0	0	4	4	0	10	18	4.5	27	18	26	36	107	26.75	13	40	16	21	90	22.5	5
Bdellovibrionaceae_1	F	1	0	Aged_1_153890	99.11	100	N	Bdellovibrionaceae	silva|DQ017948.1.1471	-	-	-	-	-	Bacteria	Proteobacteria	Oligoflexia	Bdellovibrionales	Bdellovibrionaceae	Bdellovibrionaceae	Bdellovibrionaceae	Aged_1_153890;Aged_1_24289	GGATTAGATACCCTGGTAGTCCACGCCGTAAACGATGAGTGCTAGCTGCTGGGAATGTTTACCGTTTCAGTGGCGAAGCTAACGCATTAAGCACTCCGCCTGGGAAGTACGGCCGCAAGGCTAAAACTCAAAGGAATTGACGGGGGCCCGCACAAGCGGTGGAGCATGTGGTTTAATTCGAAGCAACGCGCAGAACCTTACCCAGGCTTGACATCTCGGGAACCCTGCGGAAACGTGGGGGTGCCTTCTCACGAAGGAGCCCGATGACAGGTGCTGCATGGCTGTCGTCAGCTCGTGCTGTGAGGTGTTCGGTTAAGTCCGGCAACGAGCGCAACCC	GGATTAGATACCCTGGTAGTCCACGCCGTAAACGATGAGTGCTAGCTGCTGGGAATGTTTACCGTCTCAGTGGCGAAGCTAACGCATTAAGCACTCCGCCTGGGAAGTACGGCCGCAAGGCTAAAACTCAAAGGAATTGACGGGGGCCCGCACAAGCGGTGGAGCATGTGGTTTAATTCGAAGCAACGCGCAGAACCTTACCCAGGCTTGACATCTCGGGAACCCTGTGGAAACGCGGGGGTGCCTTCTCACGAAGGAGCCCGATGACAGGTGCTGCATGGCTGTCGTCAGCTCGTGCTGTGAGGTGTTCGGTTAAGTCCGGCAACGAGCGCAACCC	0	0	0	0	0	0	0	0	0	0	0	0	6	0	5	2	13	3.25	12	14	14	17	57	14.25	9
Bdellovibrionaceae_2	F	1	0	Compost_1_71778	100	100	N	Bdellovibrionaceae	silva|JN387335.1.1325	-	-	-	-	-	Bacteria	Proteobacteria	Oligoflexia	Bdellovibrionales	Bdellovibrionaceae	Bdellovibrionaceae	Bdellovibrionaceae	Compost_1_71778	GGATTAGATACCCTGGTAGTCCGCGCCGTAAACGATGAGTGCTAGCTGCTGGGAATGTTTACCGTCTCAGTGGCGAAGCCAACGCATTAAGCACTCCGCCTGGGAAGTACGGCCGCAAGGCTAAAACTCAAAGGAATTGACGGGGGCCCGCACAAGCGGTGGAGCATGTGGTTTAATTCGAAGCAACGCGCAGAACCTTACCCAGGCTTGACATCCCGGGAACCTCGCGGAAACGTGAGGGTGCCTTCTCACGAAGGAGCCCGGTGACAGGTGCTGCATGGCTGTCGTCAGCTCGTGCTGTGAGGTGTTCGGTTAAGTCCGGCAACGAGCGCAACCC	GGATTAGATACCCTGGTAGTCCGCGCCGTAAACGATGAGTGCTAGCTGCTGGGAATGTTTACCGTCTCAGTGGCGAAGCCAACGCATTAAGCACTCCGCCTGGGAAGTACGGCCGCAAGGCTAAAACTCAAAGGAATTGACGGGGGCCCGCACAAGCGGTGGAGCATGTGGTTTAATTCGAAGCAACGCGCAGAACCTTACCCAGGCTTGACATCCCGGGAACCTCGCGGAAACGTGAGGGTGCCTTCTCACGAAGGAGCCCGGTGACAGGTGCTGCATGGCTGTCGTCAGCTCGTGCTGTGAGGTGTTCGGTTAAGTCCGGCAACGAGCGCAACCC	3	0	0	0	3	0.75	0	0	0	0	0	0	26	15	15	11	67	16.75	34	35	67	64	200	50	112
Bdellovibrionaceae_3	F	1	0	Aged_3_33278	99.11	100	N	Bdellovibrionaceae	silva|LN565855.1.1336	-	-	-	-	-	Bacteria	Proteobacteria	Oligoflexia	Bdellovibrionales	Bdellovibrionaceae	Bdellovibrionaceae	Bdellovibrionaceae	Aged_3_33278;Compost_3_42042;Aged_2_131619	GGATTAGATACCCTGGTAGTCCACGCCGTAAACGATGAGTGCTAGCTGCCGGGAATGTTTACCGTCTCGGTGGCGAAGCCAACGCATTAAGCACTCCGCCTGGGAAGTACGGCCGCAAGGCTAAAACTCAAAGGAATTGACGGGGGCCCGCACAAGCGGTGGAGCATGTGGTTTAATTCGAAGCAACGCGCAGAACCTTACCCAGGCTTGACATCCCGGAAACCCTGTGGAAACACGGGGGTGCCGTCGCAAGACGGAATCCGGTGACAGGTGCTGCATGGCTGTCGTCAGCTCGTGCTGTGAGGTGTTCGGTTAAGTCCGGCAACGAGCGCAACCC	GGATTAGATACCCTGGTAGTCCACGCCGTAAACGATGAGTGCTAGCTGCCGGGAATGTTTACCGTCTCGGTGGCGAAGCCAACGCATTAAGCACTCCGCCTGGGAAGTACGGCCGCAAGGCTAAAACTCAAAGGAATTGACGGGGGCCCGCACAAGCGGTGGAGCATGTGGTTTAATTCGAAGCAACGCGCAGAACCTTACCCAGGCTTGACATCCCGGAAACCTCGTGGAAACGCGGGGGTGCCGTCGCAAGACGGAATCCGGTGACAGGTGCTGCATGGCTGTCGTCAGCTCGTGCTGTGAGGTGTTCGGTTAAGTCCGGCAACGAGCGCAACCC	0	0	0	0	0	0	29	6	8	15	58	14.5	83	33	72	49	237	59.25	86	24	34	32	176	44	17
Beijerinckia_1	G	1	0	Aged_1_44077	100	100	N	Beijerinckia	nt|AY942957.1	-	-	-	-	-	Bacteria	Proteobacteria	Alphaproteobacteria	Rhizobiales	Beijerinckiaceae	Beijerinckia	Beijerinckia	Aged_3_121794;Aged_1_20062;Aged_1_44077;Aged_1_135589;Aged_1_156537;Aged_1_11627	GGATTAGATACCCTGGTAGTCCACGCCGTAAACGATGGATGCTAGCCGTTGGCAGGCTTGCCTGTCAGTGGCGCAGCTAACGCATTAAGCATCCCGCCTGGGGAGTACGGTCGCAAGATTAAAACTCAAAGGAATTGACGGGGGCCCGCACAAGCGGTGGAGCATGTGGTTCAATTCGAAGCAACGCGCAGAACCTTACCAACCTTTGACATGTCCCGTATGAGCACCAGAGATGGAGCTCTTCAGTTCGGCTGGCGGGAACACAGGTGCTGCATGGCTGTCGTCAGCTCGTGTCGTGAGATGTTGGGTTAAGTCCCGCAACGAGCGCAACCC	GGATTAGATACCCTGGTAGTCCACGCCGTAAACGATGGATGCTAGCCGTTGGCAGGCTTGCCTGTCAGTGGCGCAGCTAACGCATTAAGCATCCCGCCTGGGGAGTACGGTCGCAAGATTAAAACTCAAAGGAATTGACGGGGGCCCGCACAAGCGGTGGAGCATGTGGTTCAATTCGAAGCAACGCGCAGAACCTTACCAACCTTTGACATGTCCCGTATGAGCACCAGAGATGGAGCTCTTCAGTTCGGCTGGCGGGAACACAGGTGCTGCATGGCTGTCGTCAGCTCGTGTCGTGAGATGTTGGGTTAAGTCCCGCAACGAGCGCAACCC	0	0	0	0	0	0	0	0	0	0	0	0	2	1	0	2	5	1.25	14	28	30	50	122	30.5	39
Betaproteobacteria_MF_1	F	1	2	Aged_1_12276	100	100	N	Oxalobacteraceae;Rhodocyclaceae	nt|AM934885.1;nt|LN555016.1	-	-	-	-	-	Bacteria	Proteobacteria	Betaproteobacteria	Betaproteobacteria_MF	Betaproteobacteria_MF	Betaproteobacteria_MF	Betaproteobacteria_MF	Aged_1_12276;Aged_1_107246;Aged_1_150571;Aged_1_32292	GGATTAGATACCCTGGTAGTCCACGCCCTAAACTATGTCAACTGGTTGTCGGGGAAGAAATTCCTTGGTAACGAAGCTAACGCGTGAAGTTGACCGCCTGGGGAGTACGGCCGCAAGGTTAAAACTCAAAGGAATTGACGGGGACCCGCACAAGCGGTGGATTATGTGGATTAATTCGATGCAACGCGAAAAACCTTACCTACCCTTGACATGTACGGAACCCTCCAGAGATGGAGGGGTGCCCGAAAGGGAGCCGTAACACAGGTGCTGCATGGCTGTCGTCAGCTCGTGTCGTGAGATGTTGGGTTAAGTCCCGCAACGAGCGCAACCC	GGATTAGATACCCTGGTAGTCCACGCCCTAAACTATGTCAACTGGTTGTCGGGGAAGAAATTCCTTGGTAACGAAGCTAACGCGTGAAGTTGACCGCCTGGGGAGTACGGCCGCAAGGTTAAAACTCAAAGGAATTGACGGGGACCCGCACAAGCGGTGGATTATGTGGATTAATTCGATGCAACGCGAAAAACCTTACCTACCCTTGACATGTACGGAACCCTCCAGAGATGGAGGGGTGCCCGAAAGGGAGCCGTAACACAGGTGCTGCATGGCTGTCGTCAGCTCGTGTCGTGAGATGTTGGGTTAAGTCCCGCAACGAGCGCAACCC	0	0	0	0	0	0	0	0	0	0	0	0	0	0	16	15	31	7.75	7	91	63	42	203	50.75	7
Betaproteobacteria_MF_2	F	1	2	Aged_3_110256	100	100	N	Rhodocyclaceae;Sterolibacteriaceae	nt|AP019373.1;rdp|S000920980;silva|FJ638595.1.1413	-	-	-	-	-	Bacteria	Proteobacteria	Betaproteobacteria	Betaproteobacteria_MF	Betaproteobacteria_MF	Betaproteobacteria_MF	Betaproteobacteria_MF	Aged_3_110256	GGATTAGATACCCTGGTAGTCCACGCCCTAAACGATGCCAACTAGGTGTTGGGGAAGGAGACTTTCTTAGTACCGTAGCTAACGCGTGAAGTTGGCCGCCTGGGGAGTACGGTCGCAAGATTAAAACTCAAAGGAATTGACGGGGACCCGCACAAGCGGTGGATGATGTGGATTAATTCGATGCAACGCGAAAAACCTTACCTACCCTTGACATGCCAGGAACCCTGCTGAGAGGTGGGGGTGCCCGAAAGGGAGCCTGGACACAGGTGCTGCATGGCTGTCGTCAGCTCGTGTCGTGAGATGTTGGGTTAAGTCCCGCAACGAGCGCAACCC	GGATTAGATACCCTGGTAGTCCACGCCCTAAACGATGCCAACTAGGTGTTGGGGAAGGAGACTTTCTTAGTACCGTAGCTAACGCGTGAAGTTGGCCGCCTGGGGAGTACGGTCGCAAGATTAAAACTCAAAGGAATTGACGGGGACCCGCACAAGCGGTGGATGATGTGGATTAATTCGATGCAACGCGAAAAACCTTACCTACCCTTGACATGCCAGGAACCCTGCTGAGAGGTGGGGGTGCCCGAAAGGGAGCCTGGACACAGGTGCTGCATGGCTGTCGTCAGCTCGTGTCGTGAGATGTTGGGTTAAGTCCCGCAACGAGCGCAACCC	0	0	0	0	0	0	1	3	4	2	10	2.5	16	6	15	4	41	10.25	17	11	17	13	58	14.5	7
Betaproteobacteria_MF_3	F	1	2	Aged_1_10454	100	100	N	Alcaligenaceae;Nitrosomonadaceae	nt|LN555095.1;silva|KC331362.1.1495	-	-	-	-	-	Bacteria	Proteobacteria	Betaproteobacteria	Betaproteobacteria_MF	Betaproteobacteria_MF	Betaproteobacteria_MF	Betaproteobacteria_MF	Aged_1_106723;Aged_1_102908;Aged_1_10454;Aged_1_106167;Aged_1_102720;Aged_1_146998;Aged_1_105257;Aged_1_104381	GGATTAGATACCCTGGTAGTCCACGCCCTAAACGATGTCAACTGGTTGTCGGGGAAGTTATTCCTTGGTAACGAAGCTAACGCGTGAAGTTGACCGCCTGGGGAGTACGGCCGCAAGGTTAAAACTCAAAGGAATTGACGGGGACCCGCACAAGCGGTGGATTATGTGGATTAATTCGATGCAACGCGAAAAACCTTACCTACCCTTGACTTGTACGGAACCCCGCAGAGATGCGGGGGTGCCCGAAAGGGAGCCGTAACACAGGTGCTGCATGGCTGTCGTCAGCTCGTGTCGTGAGATGTTGGGTTAAGTCCCGCAACGAGCGCAACCC	GGATTAGATACCCTGGTAGTCCACGCCCTAAACGATGTCAACTGGTTGTCGGGGAAGTTATTCCTTGGTAACGAAGCTAACGCGTGAAGTTGACCGCCTGGGGAGTACGGCCGCAAGGTTAAAACTCAAAGGAATTGACGGGGACCCGCACAAGCGGTGGATTATGTGGATTAATTCGATGCAACGCGAAAAACCTTACCTACCCTTGACTTGTACGGAACCCCGCAGAGATGCGGGGGTGCCCGAAAGGGAGCCGTAACACAGGTGCTGCATGGCTGTCGTCAGCTCGTGTCGTGAGATGTTGGGTTAAGTCCCGCAACGAGCGCAACCC	0	0	0	0	0	0	6	8	4	8	26	6.5	4	4	23	8	39	9.75	2	0	0	3	5	1.25	0
Betaproteobacteria_MF_4	F	1	2	Aged_4_12459	100	100	N	Nitrosomonadaceae;Rhodocyclaceae	rdp|S000938203;silva|AM935226.1.1359	-	-	-	-	-	Bacteria	Proteobacteria	Betaproteobacteria	Betaproteobacteria_MF	Betaproteobacteria_MF	Betaproteobacteria_MF	Betaproteobacteria_MF	Compost_1_106142;Aged_3_74963;Aged_4_12459	GGCTTAGATACCCTGGTAGTCCACGCCCTAAACGATGTCGACTAGGTGTTGGGGAAGGAGACTTCCTTAGTACCGCAGCTAACGCGTGAAGTCGACCGCCTGGGGAGTACGGTCGCAAGATTAAAACTCAAAGGAATTGACGGGGACCCGCACAAGCGGTGGATGATGTGGATTAATTCGATGCAACGCGAAAAACCTTACCTACCCTTGACATGTACGGAAGCCCGATGAGAGTTGGGTGTGCCCGAAAGGGAGCCGTAACACAGGTGCTGCATGGCTGTCGTCAGCTCGTGTCGTGAGATGTTGGGTTAAGTCCCGCAACGAGCGCAACCC	GGATTAGATACCCTGGTAGTCCACGCCCTAAACGATGTCGACTAGGTGTTGGGGAAGGAGACTTCCTTAGTACCGCAGCTAACGCGTGAAGTCGACCGCCTGGGGAGTACGGTCGCAAGATTAAAACTCAAAGGAATTGACGGGGACCCGCACAAGCGGTGGATGATGTGGATTAATTCGATGCAACGCGAAAAACCTTACCTACCCTTGACATGTACGGAAGCCCGATGAGAGTTGGGTGTGCCCGAAAGGGAGCCGTAACACAGGTGCTGCATGGCTGTCGTCAGCTCGTGTCGTGAGATGTTGGGTTAAGTCCCGCAACGAGCGCAACCC	0	0	0	0	0	0	0	1	11	18	30	7.5	16	19	27	26	88	22	8	13	1	15	37	9.25	17
Betaproteobacteria_MF_5	F	1	2	Compost_1_107979	100	100	N	Nitrosomonadaceae;Rhodocyclaceae	rdp|S001938900;silva|GU454871.1.1497	-	-	-	-	-	Bacteria	Proteobacteria	Betaproteobacteria	Betaproteobacteria_MF	Betaproteobacteria_MF	Betaproteobacteria_MF	Betaproteobacteria_MF	Compost_1_107979	GGATTAGATACCCTGGTAGTCCACGCCCTAAACGATGTCGACTGGTTGTTGGGGGTTTGACACTCTCAGTAACGAAGCTAACGCGTGAAGTCGACCGCCTGGGGAGTACGGCCGCAAGGTTAAAACTCAAAGGAATTGACGGGGACCCGCACAAGCGGTGGATTATGTGGATTAATTCGATGCAACGCGAAAAACCTTACCTACCCTTGACATGTCCTGAATCCTGGAGAGATCCGGGGGTGCCCGAAAGGGAACGGGAACACAGGTGCTGCATGGCTGTCGTCAGCTCGTGTCGTGAGATGTTGGGTTAAGTCCCGCAACGAGCGCAACCC	GGATTAGATACCCTGGTAGTCCACGCCCTAAACGATGTCGACTGGTTGTTGGGGGTTTGACACTCTCAGTAACGAAGCTAACGCGTGAAGTCGACCGCCTGGGGAGTACGGCCGCAAGGTTAAAACTCAAAGGAATTGACGGGGACCCGCACAAGCGGTGGATTATGTGGATTAATTCGATGCAACGCGAAAAACCTTACCTACCCTTGACATGTCCTGAATCCTGGAGAGATCCGGGGGTGCCCGAAAGGGAACGGGAACACAGGTGCTGCATGGCTGTCGTCAGCTCGTGTCGTGAGATGTTGGGTTAAGTCCCGCAACGAGCGCAACCC	9	0	1	1	11	2.75	5	10	5	7	27	6.75	8	7	7	39	61	15.25	7	1	0	6	14	3.5	3
Betaproteobacteria_MF_6	F	1	2	Compost_1_108919	100	100	N	Nitrosomonadaceae;Rhodocyclaceae	rdp|S002159945;silva|FJ936802.1.769	-	-	-	-	-	Bacteria	Proteobacteria	Betaproteobacteria	Betaproteobacteria_MF	Betaproteobacteria_MF	Betaproteobacteria_MF	Betaproteobacteria_MF	Compost_1_108919	GGATTAGATACCCTGGTAGTCCACGCCCTAAACGATGTCGACTAGTTGTTGGGGGAGTTAAATCCCTTAGTAACGCAGCTAACGCGTGAAGTCGACCGCCTGGGGAGTACGGTCGCAAGATTAAAACTCAAAGGAATTGACGGGGGCCCGCACAAGCGGTGGATGATGTGGTTTAATTCGACGCAACGCGAAAAACCTTACCTACCCTTGACATGTACGGAACTCCGCAGAGATGTGGAGGTGCCCGAAAGGGAGCCGTAACACAGGTGCTGCATGGCTGTCGTCAGCTCGTGTCGTGAGATGTTGGGTTAAGTCCCGCAACGAGCGCAACCC	GGATTAGATACCCTGGTAGTCCACGCCCTAAACGATGTCGACTAGTTGTTGGGGGAGTTAAATCCCTTAGTAACGCAGCTAACGCGTGAAGTCGACCGCCTGGGGAGTACGGTCGCAAGATTAAAACTCAAAGGAATTGACGGGGGCCCGCACAAGCGGTGGATGATGTGGTTTAATTCGACGCAACGCGAAAAACCTTACCTACCCTTGACATGTACGGAACTCCGCAGAGATGTGGAGGTGCCCGAAAGGGAGCCGTAACACAGGTGCTGCATGGCTGTCGTCAGCTCGTGTCGTGAGATGTTGGGTTAAGTCCCGCAACGAGCGCAACCC	0	0	0	0	0	0	0	0	0	0	0	0	2	1	0	0	3	0.75	6	9	20	5	40	10	4
Betaproteobacteria_MF_7	F	1	2	Compost_1_13265	100	100	N	Nitrosomonadaceae;Rhodocyclaceae	rdp|S004121352;silva|AB308364.1.1483	-	-	-	-	-	Bacteria	Proteobacteria	Betaproteobacteria	Betaproteobacteria_MF	Betaproteobacteria_MF	Betaproteobacteria_MF	Betaproteobacteria_MF	Compost_1_45086;Compost_1_157803;Compost_1_13265;Compost_1_39083	GGCTTAGATACCCTGGTAGTCCACGCCCTAAACGATGTCGACTGGTTGTTGGGGGTTTGACACTCTCAGTAACGAAGCTAACGCGTGAAGTCGACCGCCTGGGGAGTACGGCCGCAAGGTTAAAACTCAAAGGAATTGACGGGGACCCGCACAAGCGGTGGATTATGTGGATTAATTCGATGCAACGCGAAAAACCTTACCTACCCTTGACATGTCCTGAAGCCTGGAGAGATCCGGGTGTGCCCGAAAGGGAACGGGAACACAGGTGCTGCATGGCTGTCGTCAGCTCGTGTCGTGAGATGTTGGGTTAAGTCCCGCAACGAGCGCAACCC	GGATTAGATACCCTGGTAGTCCACGCCCTAAACGATGTCGACTGGTTGTTGGGGGTTTGACACTCTCAGTAACGAAGCTAACGCGTGAAGTCGACCGCCTGGGGAGTACGGCCGCAAGGTTAAAACTCAAAGGAATTGACGGGGACCCGCACAAGCGGTGGATTATGTGGATTAATTCGATGCAACGCGAAAAACCTTACCTACCCTTGACATGTCCTGAAGCCTGGAGAGATCCGGGTGTGCCCGAAAGGGAACGGGAACACAGGTGCTGCATGGCTGTCGTCAGCTCGTGTCGTGAGATGTTGGGTTAAGTCCCGCAACGAGCGCAACCC	20	3	4	3	30	7.5	97	75	149	267	588	147	67	176	71	27	341	85.25	60	22	16	31	129	32.25	13
Betaproteobacteriales_1	O	1	0	Aged_1_12827	100	100	N	Betaproteobacteriales	silva|AB161312.1.999	-	-	-	-	-	Bacteria	Proteobacteria	Gammaproteobacteria	Betaproteobacteriales	Betaproteobacteriales	Betaproteobacteriales	Betaproteobacteriales	Aged_1_98793;Aged_1_12827;Aged_3_172055;Compost_1_82432;Aged_1_40500;Aged_1_57160	GGATTAGATACCCTGGTAGTCCACGCCCTAAACGATGTCAACTGGTTGTCGGGGAAGCAATTCCTTGGTAACGAAGCTAACGCGTGAAGTTGACCGCCTGGGGAGTACGGCCGCAAGGTTAAAACTCAAAGGAATTGACGGGGACCCGCACAAGCGGTGGATTATGTGGATTAATTCGATGCAACGCGAAAAACCTTACCTACCCTTGACATGTACGGAACCTCGCAGAGATGTGAGGGTGCCCGAAAGGGAACCGTAACACAGGTGCTGCATGGCTGTCGTCAGCTCGTGTCGTGAGATGTTGGGTTAAGTCCCGCAACGAGCGCAACCC	GGATTAGATACCCTGGTAGTCCACGCCCTAAACGATGTCAACTGGTTGTCGGGGAAGCAATTCCTTGGTAACGAAGCTAACGCGTGAAGTTGACCGCCTGGGGAGTACGGCCGCAAGGTTAAAACTCAAAGGAATTGACGGGGACCCGCACAAGCGGTGGATTATGTGGATTAATTCGATGCAACGCGAAAAACCTTACCTACCCTTGACATGTACGGAACCTCGCAGAGATGTGAGGGTGCCCGAAAGGGAACCGTAACACAGGTGCTGCATGGCTGTCGTCAGCTCGTGTCGTGAGATGTTGGGTTAAGTCCCGCAACGAGCGCAACCC	0	0	0	0	0	0	0	0	0	1	1	0.25	1	1	0	1	3	0.75	21	23	21	43	108	27	14
Betaproteobacteriales_10	O	1	0	Aged_1_102321	100	100	N	Betaproteobacteriales	silva|JX271905.1.1496	-	-	-	-	-	Bacteria	Proteobacteria	Gammaproteobacteria	Betaproteobacteriales	Betaproteobacteriales	Betaproteobacteriales	Betaproteobacteriales	Aged_1_102321	GGATTAGATACCCTGGTAGTCCACGCCCTAAACGATGTCAACTGGTTGTCGGGGAAGCAATTCCTTGGTAACGAAGCTAACGCGTGAAGTTGACCGCCTGGGGAGTACGGCCGCAAGGTTAAAACTCAAAGGAATTGACGGGGACCCGCACAAGCGGTGGATTATGTGGATTAATTCGATGCAACGCGAAAAACCTTACCTACCCTTGACATGTACGGAACCCCGCAGAGATGCGGGGGTGCCCGAAAGGGAGCCGTAACACAGGTGCTGCATGGCTGTCGTCAGCTCGTGTCGTGAGATGTTGGGTTAAGTCCCGCAACGAGCGCAACCC	GGATTAGATACCCTGGTAGTCCACGCCCTAAACGATGTCAACTGGTTGTCGGGGAAGCAATTCCTTGGTAACGAAGCTAACGCGTGAAGTTGACCGCCTGGGGAGTACGGCCGCAAGGTTAAAACTCAAAGGAATTGACGGGGACCCGCACAAGCGGTGGATTATGTGGATTAATTCGATGCAACGCGAAAAACCTTACCTACCCTTGACATGTACGGAACCCCGCAGAGATGCGGGGGTGCCCGAAAGGGAGCCGTAACACAGGTGCTGCATGGCTGTCGTCAGCTCGTGTCGTGAGATGTTGGGTTAAGTCCCGCAACGAGCGCAACCC	0	0	0	0	0	0	0	0	0	0	0	0	1	0	0	0	1	0.25	10	11	23	31	75	18.75	29
Betaproteobacteriales_11	O	1	0	Aged_1_15518	100	100	N	Betaproteobacteriales	silva|KC855000.1.1458	-	-	-	-	-	Bacteria	Proteobacteria	Gammaproteobacteria	Betaproteobacteriales	Betaproteobacteriales	Betaproteobacteriales	Betaproteobacteriales	Aged_2_26214;Aged_1_117050;Aged_1_121462;Aged_4_139568;Aged_1_15518;Aged_1_22266	GGCTTAGATACCCTGGTAGTCCACGCCCTAAACTATGTCGACTGGTTGTTGGGGGAGTCTGTCCCTCAGTAACGTAGCTAACGCGTGAAGTCGACCGCCTGGGGAGTACGGTCGCAAGATTAAAACTCAAAGGAATTGACGGGGACCCGCACAAGCGGTGGATTATGTGGATTAATTCGATGCAACGCGAAGAACCTTACCTACCCTTGACATGCCAGGAACCTCGCAGAGATGTGAGGGTGCCCGAAAGGGAGCCTGGACACAGGTGCTGCATGGCTGTCGTCAGCTCGTGTCGTGAGATGTTGGGTTAAGTCCCGCAACGAGCGCAACCC	GGATTAGATACCCTGGTAGTCCACGCCCTAAACTATGTCGACTGGTTGTTGGGGGAGTCTGTCCCTCAGTAACGTAGCTAACGCGTGAAGTCGACCGCCTGGGGAGTACGGTCGCAAGATTAAAACTCAAAGGAATTGACGGGGACCCGCACAAGCGGTGGATTATGTGGATTAATTCGATGCAACGCGAAGAACCTTACCTACCCTTGACATGCCAGGAACCTCGCAGAGATGTGAGGGTGCCCGAAAGGGAGCCTGGACACAGGTGCTGCATGGCTGTCGTCAGCTCGTGTCGTGAGATGTTGGGTTAAGTCCCGCAACGAGCGCAACCC	1	0	0	0	1	0.25	1	0	0	0	1	0.25	0	3	1	2	6	1.5	23	34	32	22	111	27.75	20
Betaproteobacteriales_12	O	1	0	Aged_1_10188	100	100	N	Betaproteobacteriales	silva|KF916846.1.816	-	-	-	-	-	Bacteria	Proteobacteria	Gammaproteobacteria	Betaproteobacteriales	Betaproteobacteriales	Betaproteobacteriales	Betaproteobacteriales	Aged_1_137231;Aged_1_137652;Aged_1_10188;Aged_1_101734;Aged_1_108465;Aged_1_108514;Aged_1_102864;Aged_1_108708	GGATTAGATACCCTGGTAGTCCACGCCCTAAACTATGTCGACTGGTTGTTGGGGGAGTCTGTCCCTCAGTAACGTAGCTAACGCGTGAAGTCGACCGCCTGGGGAGTACGGTCGCAAGATTAAAACTCAAAGGAATTGACGGGGACCCGCACAAGCGGTGGATTATGTGGATTAATTCGATGCAACGCGAAGAACCTTACCTACCCTTGACATGCCAGGAACCTCGCAGAGATGTGAGGGTGCCCGAAAGGGAACCTGGACACAGGTGCTGCATGGCTGTCGTCAGCTCGTGTCGTGAGATGTTGGGTTAAGTCCCGCAACGAGCGCAACCC	GGATTAGATACCCTGGTAGTCCACGCCCTAAACTATGTCGACTGGTTGTTGGGGGAGTCTGTCCCTCAGTAACGTAGCTAACGCGTGAAGTCGACCGCCTGGGGAGTACGGTCGCAAGATTAAAACTCAAAGGAATTGACGGGGACCCGCACAAGCGGTGGATTATGTGGATTAATTCGATGCAACGCGAAGAACCTTACCTACCCTTGACATGCCAGGAACCTCGCAGAGATGTGAGGGTGCCCGAAAGGGAACCTGGACACAGGTGCTGCATGGCTGTCGTCAGCTCGTGTCGTGAGATGTTGGGTTAAGTCCCGCAACGAGCGCAACCC	3	1	0	0	4	1	18	10	6	3	37	9.25	3	2	3	4	12	3	3	1	2	2	8	2	0
Betaproteobacteriales_13	O	1	0	Compost_1_170061	99.695	99.0937	N	Betaproteobacteriales	silva|KM327222.1.555	-	-	-	-	-	Bacteria	Proteobacteria	Gammaproteobacteria	Betaproteobacteriales	Betaproteobacteriales	Betaproteobacteriales	Betaproteobacteriales	Compost_1_183570;Compost_1_93982;Compost_1_170061;Compost_1_11851	GGCTTAGATACCCTGGTAGTCCACGCCCTAAACGATGTCAACTGGTTGTCGGGGAAGCAATTCCTTGGTAACGAAGCTAACGCGTGAAGTTGACCGCCTGGGGAGTACGGCCGCAAGGTTAAAACTCAAAGGAATTGACGGGGACCCGCACAAGCGGTGGATTATGTGGATTAATTCGATGCAACGCGAAAAACCTTACCTACCCTTGACATGTACGGAACTTGGCAGAGATGCCTTGGTGCCCGAAAGGGAGCCGTAACACAGGTGCTGCATGGCTGTCGTCAGCTCGTGTCGTGAGATGTTGGGTTAAGTCCCGCAACGAGCGCAACCC	TAGATACCCGGGTAGTCCACGCCCTAAACGATGTCAACTGGTTGTCGGGGAAGCAATTCCTTGGTAACGAAGCTAACGCGTGAAGTTGACCGCCTGGGGAGTACGGCCGCAAGGTTAAAAACTCAAAGGAATTGACGGGGACCCGCACAAGCGGTGGATTATGTGGATTAATTCGATGCAACGCGAAAAACCTTACCTACCCTTGACATGTACGGAACTTGGCAGAGATGCCTTGGTGCCCGAAAGGGAGCCGTAACACAGGTGCTGCATGGCTGTCGTCAGCTCGTGTCGTGAGATGTTGGGTTAAGTCCCGCAACGAGCGCAACCC	0	0	0	0	0	0	0	0	0	0	0	0	1	0	0	0	1	0.25	3	35	47	8	93	23.25	0
Betaproteobacteriales_14	O	1	0	Aged_3_26879	100	100	N	Betaproteobacteriales	silva|KM840966.1.1130	-	-	-	-	-	Bacteria	Proteobacteria	Gammaproteobacteria	Betaproteobacteriales	Betaproteobacteriales	Betaproteobacteriales	Betaproteobacteriales	Aged_3_26879;Compost_1_46324;Aged_4_158482;Aged_1_12425;Compost_1_160761	GGATTAGATACCCTGGTAGTCCACGCCCTAAACGATGCTCACTAGGTGTTGGGGAAGCGATTCCTTGGTACCGTAGCTAACGCGTGAAGTGAGCCGCCTGGGGAGTACGGCCGCAAGGTTAAAACTCAAAGGAATTGACGGGGACCCGCACAAGCGGTGGATGATGTGGATTAATTCGATGCAACGCGAACAACCTTACCTACCCTTGACATGTCGCGAATCCTGCTGAGAGGCGGGGGTGCCCGAAAGGGAACGCGAACACAGGTGCTGCATGGCTGTCGTCAGCTCGTGTCGTGAGATGTTGGGTTAAGTCCCGCAACGAGCGCAACCC	GGATTAGATACCCTGGTAGTCCACGCCCTAAACGATGCTCACTAGGTGTTGGGGAAGCGATTCCTTGGTACCGTAGCTAACGCGTGAAGTGAGCCGCCTGGGGAGTACGGCCGCAAGGTTAAAACTCAAAGGAATTGACGGGGACCCGCACAAGCGGTGGATGATGTGGATTAATTCGATGCAACGCGAACAACCTTACCTACCCTTGACATGTCGCGAATCCTGCTGAGAGGCGGGGGTGCCCGAAAGGGAACGCGAACACAGGTGCTGCATGGCTGTCGTCAGCTCGTGTCGTGAGATGTTGGGTTAAGTCCCGCAACGAGCGCAACCC	1	0	0	0	1	0.25	2	0	4	2	8	2	7	15	26	10	58	14.5	48	54	32	40	174	43.5	22
Betaproteobacteriales_2	O	1	0	Aged_3_116197	99.396	100	N	Betaproteobacteriales	silva|AB486689.1.1328	-	-	-	-	-	Bacteria	Proteobacteria	Gammaproteobacteria	Betaproteobacteriales	Betaproteobacteriales	Betaproteobacteriales	Betaproteobacteriales	Aged_3_116197	GGCTTAGATACCCTGGTAGTCCACGCCCTAAACGATGTCAACTGGTTGTCGGGGAAGCAATTCCTTGGTAACGAAGCTAACGCGTGAAGTTGACCGCCTGGGGAGTACGGCCGCAAGGCTAAAACTCAAAGGAATTGACGGGGACCCGCACAAGCGGTGGATTATGTGGATTAATTCGATGCAACGCGAAAAACCTTACCTACCCTTGACATGCCAGGAACCTCGCAGAGATGTGAGGGTGCCCGAAAGGGAACCTGGACACAGGTGCTGCATGGCTGTCGTCAGCTCGTGTCGTGAGATGTTGGGTTAAGTCCCGCAACGAGCGCAACCC	GGATTAGATACCCTGGTAGTCCACGCCCTAAACTATGTCAACTGGTTGTCGGGGAAGCAATTCCTTGGTAACGAAGCTAACGCGTGAAGTTGACCGCCTGGGGAGTACGGCCGCAAGGTTAAAACTCAAAGGAATTGACGGGGACCCGCACAAGCGGTGGATTATGTGGATTAATTCGATGCAACGCGAAAAACCTTACCTACCCTTGACATGCCAGGAACCTCGCAGAGATGTGAGGGTGCCCGAAAGGGAACCTGGACACAGGTGCTGCATGGCTGTCGTCAGCTCGTGTCGTGAGATGTTGGGTTAAGTCCCGCAACGAGCGCAACCC	0	0	0	0	0	0	16	1	13	32	62	15.5	56	67	14	14	151	37.75	12	4	1	8	25	6.25	6
Betaproteobacteriales_3	O	1	0	Aged_1_145681	99.396	100	N	Betaproteobacteriales	silva|AY922053.1.1391	-	-	-	-	-	Bacteria	Proteobacteria	Gammaproteobacteria	Betaproteobacteriales	Betaproteobacteriales	Betaproteobacteriales	Betaproteobacteriales	Aged_1_143127;Aged_1_28199;Aged_1_145681;Aged_1_113461;Aged_1_127073;Aged_1_104140;Aged_1_100048	GGATTAGATACCCTGGTAGTCCACGCCCTAAACGATGTCAACTGGTTGTCGGGGAAGTTATTCCTTGGTAACGAAGCTAACGCGTGAAGTTGACCGCCTGGGGAGTACGGCCGCAAGGTTAAAACTCAAAGGAATTGACGGGGACCCGCACAAGCGGTGGATTATGTGGATTAATTCGATGCAACGCGAAAAACCTTACCTACCCTTGACTTGTACGGAAGCCCGCAGAGATGTGGGTGTGCCCGAAAGGGAACCGTAACACAGGTGCTGCATGGCTGTCGTCAGCTCGTGTCGTGAGATGTTGGGTTAAGTCCCGCAACGAGCGCAACCC	GGATTAGATACCCTGGTAGTCCACGCCCTAAACGATGTCAACTGGTTGTCGGGGAAGTTATTCCTTGGTAACGAAGCTAACGCGTGAAGTTGACCGCCTGGGGAGTACGGCCGCAAGGTTAAAACTCAAAGGAATTGACGGGGACCCGCACAAGCGGTGGATTATGTGGATTAATTCGATGCAACGCGAAAAACCTTACCTACCCTTGACTTGTACGGAAGCCCGCAGAGATGTGGGCGTGCCCGAAAGGGAGCCGTAACACAGGTGCTGCATGGCTGTCGTCAGCTCGTGTCGTGAGATGTTGGGTTAAGTCCCGCAACGAGCGCAACCC	88	58	29	13	188	47	66	114	118	150	448	112	73	62	30	17	182	45.5	12	17	27	32	88	22	15
Betaproteobacteriales_4	O	1	0	Aged_1_109711	100	100	N	Betaproteobacteriales	silva|DQ137996.1.1223	-	-	-	-	-	Bacteria	Proteobacteria	Gammaproteobacteria	Betaproteobacteriales	Betaproteobacteriales	Betaproteobacteriales	Betaproteobacteriales	Aged_1_130560;Aged_3_102066;Aged_1_109711;Aged_1_159540;Aged_1_146487;Aged_1_129893;Aged_1_129350;Aged_1_135060	GGATTAGATACCCTGGTAGTCCACGCCCTAAACGATGCGAACTAGTCGTTGGGGTAGTAATACCTTAGTGACGCAGCTAACGCGTGAAGTTCGCCGCCTGGGGAGTACGGTCGCAAGACTAAAACTCAAAGGAATTGACGGGGGCCCGCACAAGCGGTGGATGATGTGGATTAATTCGATGCAACGCGAAAAACCTTACCTACCCTTGACATGCCAGGAACCTCGCAGAGATGTGAGGGTGCCCGAAAGGGAACCTGGACACAGGTGCTGCATGGCTGTCGTCAGCTCGTGTCGTGAGATGTTGGGTTAAGTCCCGCAACGAGCGCAACCC	GGATTAGATACCCTGGTAGTCCACGCCCTAAACGATGCGAACTAGTCGTTGGGGTAGTAATACCTTAGTGACGCAGCTAACGCGTGAAGTTCGCCGCCTGGGGAGTACGGTCGCAAGACTAAAACTCAAAGGAATTGACGGGGGCCCGCACAAGCGGTGGATGATGTGGATTAATTCGATGCAACGCGAAAAACCTTACCTACCCTTGACATGCCAGGAACCTCGCAGAGATGTGAGGGTGCCCGAAAGGGAACCTGGACACAGGTGCTGCATGGCTGTCGTCAGCTCGTGTCGTGAGATGTTGGGTTAAGTCCCGCAACGAGCGCAACCC	0	0	0	0	0	0	11	29	10	3	53	13.25	36	7	19	21	83	20.75	13	11	19	42	85	21.25	7
Betaproteobacteriales_5	O	1	0	Aged_1_101189	99.698	100	N	Betaproteobacteriales	silva|EU160305.1.867	-	-	-	-	-	Bacteria	Proteobacteria	Gammaproteobacteria	Betaproteobacteriales	Betaproteobacteriales	Betaproteobacteriales	Betaproteobacteriales	Aged_1_101189;Aged_1_114623;Aged_1_74647;Aged_1_38365;Aged_1_21328;Aged_1_40466	GGATTAGATACCCTGGTAGTCCACGCCCTAAACGATGTCAACTGGTTGTCGGGGAAGCAATTCCTTGGTAACGAAGCTAACGCGTGAAGTTGACCGCCTGGGGAGTACGGCCGCAAGGTTAAAACTCAAAGGAATTGACGGGGACCCGCACAAGCGGTGGATTATGTGGATTAATTCGATGCAACGCGAAAAACCTTACCTACCCTTGACATGTACGGAAGCTCGCAGAGATGTGAGCGTGCCCGAAAGGGAGCCGTAACACAGGTGCTGCATGGCTGTCGTCAGCTCGTGTCGTGAGATGTTGGGTTAAGTCCCGCAACGAGCGCAACCC	GGATTAGATACCCTGGTAGTCCACGCCCTAAACTATGTCAACTGGTTGTCGGGGAAGCAATTCCTTGGTAACGAAGCTAACGCGTGAAGTTGACCGCCTGGGGAGTACGGCCGCAAGGTTAAAACTCAAAGGAATTGACGGGGACCCGCACAAGCGGTGGATTATGTGGATTAATTCGATGCAACGCGAAAAACCTTACCTACCCTTGACATGTACGGAAGCTCGCAGAGATGTGAGCGTGCCCGAAAGGGAGCCGTAACACAGGTGCTGCATGGCTGTCGTCAGCTCGTGTCGTGAGATGTTGGGTTAAGTCCCGCAACGAGCGCAACCC	0	0	2	0	2	0.5	35	21	27	28	111	27.75	49	16	32	14	111	27.75	7	2	6	15	30	7.5	10
Betaproteobacteriales_6	O	1	0	Aged_1_118428	99.398	100	N	Betaproteobacteriales	silva|HQ271808.1.916	-	-	-	-	-	Bacteria	Proteobacteria	Gammaproteobacteria	Betaproteobacteriales	Betaproteobacteriales	Betaproteobacteriales	Betaproteobacteriales	Aged_1_4960;Aged_1_118428;Aged_1_134081;Aged_1_24665;Aged_1_102489;Aged_1_147075	GGATTAGATACCCTGGTAGTCCACGCCCTAAACGATGTCGACTGGTTGTTGGGGGAGTCTGTCCCTCAGTAACGTAGCTAACGCGTGAAGTCGACCGCCTGGGGAGTACGGTCGCAAGATTAAAACTCAAAGGAATTGACGGGGACCCGCACAAGCGGTGGATTATGTGGATTAATTCGATGCAACGCGAAGAACCTTACCTACCCTTGACATGCCAGGAACCCTGCAGAGATGTGGGGGTGCCCGAAAGGGAACCTGGACACAGGTGCTGCATGGCTGTCGTCAGCTCGTGTCGTGAGATGTTGGGTTAAGTCCCGCAACGAGCGCAACCC	GGATTAGATACCCTGGTAGTCCACGCCCTAAACGATGTCGACTAGTTGTTGGGGGAGTCTGTCCCTCAGTAACGTAGCTAACGCGTGAAGTCGACCGCCTGGGGAGTACGGTCGCAAGATTAAAACCCAAAGGAATTGACGGGGACCCGCACAAGCGGTGGATTATGTGGATTAATTCGATGCAACGCGAAGAACCTTACCTACCCTTGACATGCCAGGAACCCTGCAGAGATGTGGGGGTGCCCGAAAGGGAACCTGGACACAGGTGCTGCATGGCTGTCGTCAGCTCGTGTCGTGAGATGTTGGGTTAAGTCCCGCAACGAGCGCAACCC	0	0	0	0	0	0	0	0	0	0	0	0	0	0	4	0	4	1	17	16	24	23	80	20	2
Betaproteobacteriales_7	O	1	0	Aged_2_113202	99.699	100	N	Betaproteobacteriales	silva|HQ272347.1.915	-	-	-	-	-	Bacteria	Proteobacteria	Gammaproteobacteria	Betaproteobacteriales	Betaproteobacteriales	Betaproteobacteriales	Betaproteobacteriales	Aged_2_113202;Aged_1_9351;Aged_2_140784	GGATTAGATACCCTGGTAGTCCACGCCCTAAACGATGTCGACTGGTTGTTGGGGGAGTCTGTCCCTCAGTAACGTAGCTAACGCGTGAAGTCGACCGCCTGGGGAGTACGGTCGCAAGATTAAAACTCAAAGGAATTGACGGGGACCCGCACAAGCGGTGGATTATGTGGATTAATTCGATGCAACGCGAAGAACCTTACCTACCCTTGACATGCCAGGAACCCCGCAGAGATGTGGGGGTGCCCGAAAGGGAACCTGGACACAGGTGCTGCATGGCTGTCGTCAGCTCGTGTCGTGAGATGTTGGGTTAAGTCCCGCAACGAGCGCAACCC	GGATTAGATACCCTGGTAGTCCACGCCCTAAACGATGTCGACTAGTTGTTGGGGGAGTCTGTCCCTCAGTAACGTAGCTAACGCGTGAAGTCGACCGCCTGGGGAGTACGGTCGCAAGATTAAAACTCAAAGGAATTGACGGGGACCCGCACAAGCGGTGGATTATGTGGATTAATTCGATGCAACGCGAAGAACCTTACCTACCCTTGACATGCCAGGAACCCCGCAGAGATGTGGGGGTGCCCGAAAGGGAACCTGGACACAGGTGCTGCATGGCTGTCGTCAGCTCGTGTCGTGAGATGTTGGGTTAAGTCCCGCAACGAGCGCAACCC	0	0	0	0	0	0	0	0	0	0	0	0	1	2	1	11	15	3.75	15	43	22	12	92	23	0
Betaproteobacteriales_8	O	1	0	Aged_1_142017	100	100	N	Betaproteobacteriales	silva|JN672367.1.1292	-	-	-	-	-	Bacteria	Proteobacteria	Gammaproteobacteria	Betaproteobacteriales	Betaproteobacteriales	Betaproteobacteriales	Betaproteobacteriales	Compost_1_121163;Aged_1_142017;Aged_1_153300;Aged_1_110413	GGATTAGATACCCTGGTAGTCCACGCCCTAAACGATGTCAACTGGTTGTCGGGGAAGCAATTCCTTGGTAACGAAGCTAACGCGTGAAGTTGACCGCCTGGGGAGTACGGCCGCAAGGTTAAAACTCAAAGGAATTGACGGGGACCCGCACAAGCGGTGGATTATGTGGATTAATTCGATGCAACGCGAAAAACCTTACCTACCCTTGACATGTACGGAACCTCGCAGAGATGTGAGGGTGCCCGAAAGGGAGCCGTAACACAGGTGCTGCATGGCTGTCGTCAGCTCGTGTCGTGAGATGTTGGGTTAAGTCCCGCAACGAGCGCGACCC	GGATTAGATACCCTGGTAGTCCACGCCCTAAACGATGTCAACTGGTTGTCGGGGAAGCAATTCCTTGGTAACGAAGCTAACGCGTGAAGTTGACCGCCTGGGGAGTACGGCCGCAAGGTTAAAACTCAAAGGAATTGACGGGGACCCGCACAAGCGGTGGATTATGTGGATTAATTCGATGCAACGCGAAAAACCTTACCTACCCTTGACATGTACGGAACCTCGCAGAGATGTGAGGGTGCCCGAAAGGGAGCCGTAACACAGGTGCTGCATGGCTGTCGTCAGCTCGTGTCGTGAGATGTTGGGTTAAGTCCCGCAACGAGCGCAACCC	0	0	0	0	0	0	8	5	0	2	15	3.75	68	23	38	47	176	44	50	45	49	50	194	48.5	37
Betaproteobacteriales_9	O	1	0	Aged_1_132492	99.396	100	N	Betaproteobacteriales	silva|JX133336.1.1496	-	-	-	-	-	Bacteria	Proteobacteria	Gammaproteobacteria	Betaproteobacteriales	Betaproteobacteriales	Betaproteobacteriales	Betaproteobacteriales	Aged_2_73950;Aged_1_132492;Aged_2_25393	GGATTAGATACCCTGGTAGTCCACGCCCTAAACGATGCGAACTAGTCGTTGGGGTAGCAATACCTTAGTGACGCAGCTAACGCGTGAAGTTCGCCGCCTGGGGAGTACGGTCGCAAGATTAAAACTCAAAGGAATTGACGGGGGCCCGCACAAGCGGTGGATGATGTGGATTAATTCGATGCAACGCGAAAAACCTTACCTACCCTTGACATGCCAGGAACCTTCCAGAGATGGGAGGGTGCCCGAAAGGGAGCCTGGACACAGGTGCTGCATGGCTGTCGTCAGCTCGTGTCGTGAGATGTTGGGTTAAGTCCCGCAACGAGCGCGACCC	GGATTAGATACCCTGGTAGTCCACGCCCTAAACGATGCGAACTAGTCGTTGGGGTAGCAATACCTTAGTGACGCAGCTAACGCGTGAAGTTCGCCGCCTGGGGACTACGGTCGCAAGACTAAAACTCAAAGGAATTGACGGGGGCCCGCACAAGCGGTGGATGATGTGGATTAATTCGATGCAACGCGAAAAACCTTACCTACCCTTGACATGCCAGGAACCTTCCAGAGATGGGAGGGTGCCCGAAAGGGAGCCTGGACACAGGTGCTGCATGGCTGTCGTCAGCTCGTGTCGTGAGATGTTGGGTTAAGTCCCGCAACGAGCGCAACCC	1	0	0	0	1	0.25	20	4	6	10	40	10	31	32	40	31	134	33.5	942	84	66	71	1163	290.75	13
Blastocatellaceae_MG_1	G	1	2	Aged_1_153062	99.396	99.3994	N	Aridibacter;Blastocatella	rdp|S004392125;silva|KM342793.1.547	-	-	-	-	-	Bacteria	Acidobacteria	Blastocatellia	Blastocatellales	Blastocatellaceae	Blastocatellaceae_MG	Blastocatellaceae_MG	Middle_1_134414;Aged_2_142353;Aged_1_153062;Aged_1_50792	GGCTTAGATACCCCGGTAGTCCTGGCCCTAAACGATGAATACTTGGTGTCTGGAGTTTTAATTCTCCGGGTGCCGTCGCTAACGTTTTAAGTATTCCGCCTGGGGAGTACGTACGCAAGTATGAAACTCAAAGGAATTGACGGGGACCCGCACAAGCGGTGGAGCATGTGGTTTAATTCGACGCAACGCGAAGAACCTTACCTAGACTAGAATGCCTTTGACCGCCTCGTAACGGAGGTTTTCCGGGCAACCGGACAAAGTGCAAGGTGCTGCATGGCTGTCGTCAGCTCGTGTCGTGAGATGTTGGGTTAAGTCCCGCAACGAGCGCAACCC	TAGATACCCGGGTAGTCCTGGCCCTAAACGATGAATACTTGGTGTCTGGAGTTTTAATTCTCCGGGTGCCGTCGCTAACGTTTTAAGTATTCCGCCTGGGGAGTACGTACGCAAGTATGAAAACTCAAAGGAAATTGACGGGGACCCGCACAAGCGGTGGAGCATGTGGTTTAATTCGACGCAACGCGAAGAACCTTACCTAGACTAGAATGCCTTTGACCGCCTCGTAACGGAGGTTTTCCGGGCAACCGGACAAAGTGCAAGGTGCTGCATGGCTGTCGTCAGCTCGTGTCGTGAGATGTTGGGTTAAGTCCCGCAACGAGCGCAACCC	0	1	0	0	1	0.25	0	0	0	0	0	0	1	2	1	2	6	1.5	14	19	29	33	95	23.75	22
Blastocatellia_1	C	1	0	Aged_1_100940	99.401	100	N	Blastocatellia	silva|EU012259.1.1045	-	-	-	-	-	Bacteria	Acidobacteria	Blastocatellia	Blastocatellia	Blastocatellia	Blastocatellia	Blastocatellia	Aged_1_101831;Aged_1_108210;Aged_1_100940;Aged_1_100052;Aged_1_154860;Aged_1_136855;Aged_1_109773;Aged_1_101078;Aged_1_104047;Aged_1_100118;Aged_1_10449;Aged_2_114506;Aged_1_116984;Aged_1_154495	GGATTAGATACCCCGGTAGTCCTGGCCTTAAACGATGCTGACTTGGTGTCCCGGGTATTCAGTCCCGGGGTGCCGGAGCTAACGCGTTAAGTCAGCCGCCTGGGGAGTACGGTCGCAAGGCTGAAACTCAAAGGAATTGACGGGGACCCGCACAAGCGGTGGAGCATGTGGTTTAATTCGACGCAACGCGAAGAACCTTACCTGGGCTAGAATGCGGTGGACAAGTCCTAGAGATAGGACGATCCCTTCGGGGCTCCTGCCTGCAAGGTGCTGCATGGCTGTCGTCAGCTCGTGTCGTGAGATGTTGGGTTAAGTCCCGCAACGAGCGCAACCC	GGATTAGATACCCCGGTAGTCCTGGCCTTAAACGATGCTGACTTGGTGTCCCGGGTATTCAGTCCCGGGGTGCCGGAGCTAACGCGTTAAGTCAGCCGCCTGGGGAGTACGGTCGCAAGGCTGAAACTCAAAGGAATTGACGGGGACCCGCACAAGCGGTGGAGCATGTGGTTTAATTCGACGCAACGCGAAGAACCTTACCTGGGCTAGAATGCGGTAGATAAGTCCTAGAGATAGGACGATCCCTTCGGGGCTCCTGCCTGCAAGGTGCTGCATGGCTGTCGTCAGCTCGTGTCGTGAGATGTTGGGTTAAGTCCCGCAACGAGCGCAACCC	3	0	0	0	3	0.75	5	0	0	0	5	1.25	15	10	20	50	95	23.75	549	1237	1116	967	3869	967.25	320
Blastocatellia_2	C	1	0	Aged_1_73862	99.094	100	N	Blastocatellia	silva|JQ825020.1.1518	-	-	-	-	-	Bacteria	Acidobacteria	Blastocatellia	Blastocatellia	Blastocatellia	Blastocatellia	Blastocatellia	Aged_1_73862;Aged_1_2498;Aged_2_126619;Aged_1_47049	GGATTAGATACCCCGGTAGTCCTGGCCCTAAACGATGGATACTTGGTGTGTGGGGTTCTGAAAGTCCCCGCGTGCCGGAGCTAACGCGGTAAGTATCCCGCCTGGGGAGTACGGTCGCAAGGCTGAAACTCAAAGGAATTGACGGGGACCCGCACAAGCGGTGGAGCATGTGGTTTAATTCGACGCAACGCGAAGAACCTTACCTGGGTTAAATCCGACCTTGCCGCCCTAGAGATAGGGCTTCCCTTCGGGGGAGGTTGGAAGGTGCTGCATGGCTGTCGTCAGCTCGTGCCGTGAGGTGTTGGGTTAAGTCCCGCAACGAGCGCAACCC	GGATTAGATACCCCGGTAGTCCTGGCCCTAAACGATGGATACTTGGTGTGTGGGGTTCTGAAAGTCCCCGCGTGCCGGAGCTAACGCGGTAAGTATCCCGCCTGGGGAGTACGGTCGCAAGGCTGAAACTCAAAGGAATTGACGGGGACCCGCACAAGCGGTGGAGCATGTGGTTTAATTCGACGCAACGCGAAGAACCTTACCTGGGTTAAATCCGACCTTGCCGCCCTGGAGACAGGGCTTCCCTTCGGGGGAGGTCGGAAGGTGCTGCATGGCTGTCGTCAGCTCGTGCCGTGAGGTGTTGGGTTAAGTCCCGCAACGAGCGCAACCC	0	0	0	0	0	0	0	0	0	0	0	0	0	0	0	5	5	1.25	4	6	3	4	17	4.25	1
Blastopirellula_1	G	1	0	Aged_1_113143	99.702	100	N	Blastopirellula	rdp|S002200767	-	-	-	-	-	Bacteria	Planctomycetes	Planctomycetia	Planctomycetales	Planctomycetaceae	Blastopirellula	Blastopirellula	Aged_1_127109;Aged_1_102209;Aged_1_113143;Aged_1_143820;Aged_1_95601;Aged_2_134968;Aged_4_132675;Aged_1_132011	GGATTAGATACCCCGGTAGTCCTAGCTGTAAACGATGAGCACTTGATCGAGGGGCCCCCCATAGCCTCTCGGTCGCAGCGAAAGTGGTAAGTGCTCCGCCTGGGGAGTATGGTCGCAAGGCTGAAACTCAAAGGAATTGACGGGGGCTCACACAAGCGGTGGAGGATGTGGCTTAATTCGAGGCTACGCGAAGAACCTTATCCTAGTCTTGACATGCACGGATTAACTCGGTGAAAGCCGAGCCACGCCTTCGGGTGGAACGTGCACAGGTGCTGCATGGCTGTCGTCAGCTCGTGTCGTGAGATGTCGGGTTAAGTCCCTTAACGAGCGCAACCC	GGATTAGATACCCCGGTAGTCCTAGCTGTAAACGATGAGCACTTGATCGTGGGGCCCCCCATAGCCTCTCGGTCGCAGCGAAAGTGGTAAGTGCTCCGCCTGGGGAGTATGGTCGCAAGGCTGAAACTCAAAGGAATTGACGGGGGCTCACACAAGCGGTGGAGGATGTGGCTTAATTCGAGGCTACGCGAAGAACCTTATCCTAGTCTTGACATGCACGGATTAACTCGGTGAAAGCCGAGCCACGCCTTCGGGTGGAACGTGCACAGGTGCTGCATGGCTGTCGTCAGCTCGTGTCGTGAGATGTCGGGTTAAGTCCCTTAACGAGCGAAACCC	0	0	0	0	0	0	4	0	1	0	5	1.25	1	1	1	1	4	1	5	21	12	18	56	14	7
Blastopirellula_2	G	1	0	Aged_1_38357	100	100	N	Blastopirellula	rdp|S002976242	-	-	-	-	-	Bacteria	Planctomycetes	Planctomycetia	Planctomycetales	Planctomycetaceae	Blastopirellula	Blastopirellula	Compost_1_148371;Aged_1_38357;Aged_1_94525;Aged_2_89852	GGATTAGATACCCCGGTAGTCCTAGCTGTAAACGTTGAGCACTTGATTGAGGGCCCCCCCATAGGCTCTCGGTCGAAGCGAAAGTGATAAGTGCTCCGCCTGGGGAGTATGGTCGCAAGGCTGAAACTCAAAGGAATTGACGGGGGCTCACACAAGCGGTGGAGGATGTGGCTTAATTCGAGGCTACGCGAAGAACCTTATCCTAGTCTTGACATGCACGGATCAACCCGGTGAAAGCCGGGCCACGCCTTCGGGTGGAACGTGCACAGGTGCTGCATGGCTGTCGTCAGCTCGTGTCGTGAGATGTCGGGTTAAGTCCCTTAACGAGCGCAACCC	GGATTAGATACCCCGGTAGTCCTAGCTGTAAACGTTGAGCACTTGATTGAGGGCCCCCCCATAGGCTCTCGGTCGAAGCGAAAGTGATAAGTGCTCCGCCTGGGGAGTATGGTCGCAAGGCTGAAACTCAAAGGAATTGACGGGGGCTCACACAAGCGGTGGAGGATGTGGCTTAATTCGAGGCTACGCGAAGAACCTTATCCTAGTCTTGACATGCACGGATCAACCCGGTGAAAGCCGGGCCACGCCTTCGGGTGGAACGTGCACAGGTGCTGCATGGCTGTCGTCAGCTCGTGTCGTGAGATGTCGGGTTAAGTCCCTTAACGAGCGAAACCC	0	0	0	0	0	0	1	1	0	6	8	2	16	8	15	5	44	11	17	12	25	39	93	23.25	9
Blastopirellula_3	G	1	0	Aged_1_157143	99.403	100	N	Blastopirellula	rdp|S004245409;silva|FJ542976.1.1500	-	-	-	-	-	Bacteria	Planctomycetes	Planctomycetia	Planctomycetales	Planctomycetaceae	Blastopirellula	Blastopirellula	Aged_1_143475;Aged_1_67720;Aged_1_157143;Aged_3_146579;Aged_1_52525;Aged_1_156969;Aged_1_1272	GGATTAGATACCCCGGTAGTCCTAGCTGTAAACGATGAGCACTAGATCGTGGGGGCTTCCACACCCTCTCGGTCGTAGCGAAAGTGTTAAGTGCTCCGCCTGGGGAGTATGGTCGCAAGGCTGAAACTCAAAGGAATTGACGGGGGCTCACACAAGCGGTGGAGGATGTGGCTTAATTCGAGGCTACGCGAAGAACCTTATCCTGGTCTTGACATGCTTGGGAACCCTCCTGAAAGGGAGGGGTGCCCTTCGGGGAGCCCTTGCACAGGTGCTGCATGGCTGTCGTCAGCTCGTGTCGTGAGATGTCGGGTTAAGTCCCTTAACGAGCGCAACCC	GGATTAGATACCCAAGTAGTCCTAGCTGTAAACGATGAGCACTAGATCGTNGGGGCTTCCACACCCTCTCGGTCGTAGCGAAAGTGTTAAGTGCTCCGCCTGGGGAGTATGGTCGCAAGGCTGAAACTCAAAGGAATTGACGGGGGCTCACACAAGCGGTGGAGGATGTGGCTTAATTCGAGGCTACGCGAAGAACCTTATCCTGGTCTTGACATGCTTGGGAACCCTCTTGAAAGGGAGGGGTGCCCTTCGGGGAGCCCTTGCACAGGTGCTGCATGGCTGTCGTCAGCTCGTGTCGTGAGATGTCGGGTTAAGTCCCTAAACGAGCGAAACCC	0	0	0	0	0	0	1	0	0	0	1	0.25	0	0	0	0	0	0	4	0	0	5	9	2.25	12
Blastopirellula_4	G	1	0	Aged_1_82849	99.405	100	N	Blastopirellula	rdp|S004418986	-	-	-	-	-	Bacteria	Planctomycetes	Planctomycetia	Planctomycetales	Planctomycetaceae	Blastopirellula	Blastopirellula	Aged_1_82849	GGATTAGATACCCCGGTAGTCCTAGCCGTAAACGATGAGCACTTGATTGAGGACCCTCCCATAGGTTCTTGGTCGAAGCGAAAGTGATAAGTGCTCCGCCTGGGGAGTATGGTCGCAAGGCTGAAACTCAAAGGAATTGACGGGGGCTCACACAAGCGGTGGAGGATGTGGCTTAATTCGAGGCTACGCGAAGAACCTTATCCTAGGTTTGACATGCATGGATTAACTCCCTGAAAGGGGAGCCACAGCTTCGGCTGGAACATGCACAGGTGCTGCATGGCTGTCGTCAGCTCGTGTCGTGAGATGTCGGGTTAAGTCCCTTAACGAGCGCAACCC	GGATTAGATACCCCGGTAGTCCTAGCCGTAAACGATGAGCACTTGATTGAGGGCCCTCCCATAGGCTCTTGGTCGAAGCGAAAGTGATAAGTGCTCCGCCTGGGGAGTATGGTCGCAAGGCTGAAACTCAAAGGAATTGACGGGGGCTCACACAAGCGGTGGAGGATGTGGCTTAATTCGAGGCTACGCGAAGAACCTTATCCTAGGTTTGACATGCATGGATTAACTCCCTGAAAGGGGAGCCACAGCTTCGGCTGGAACATGCACAGGTGCTGCATGGCTGTCGTCAGCTCGTGTCGTGAGATGTCGGGTTAAGTCCCTTAACGAGCGAAACCC	0	0	0	0	0	0	2	11	8	18	39	9.75	30	27	36	21	114	28.5	18	19	15	34	86	21.5	10
Blastopirellula_5	G	4	0	Aged_1_151824	100	100	N	Blastopirellula	rdp|S004429705	-	-	-	-	-	Bacteria	Planctomycetes	Planctomycetia	Planctomycetales	Planctomycetaceae	Blastopirellula	Blastopirellula	Aged_1_151824;Aged_1_23534;Aged_1_122942	GGATTAGATACCCCGGTAGTCCTAGCTGTAAACGATGAGCACTTGATCGAGGGGCCCCCCATAGCCTCTCGGTCGCAGCGAAAGTGGTAAGTGCTCCGCCTGGGGAGTATGGTCGCAAGGCTGAAACTCAAAGGAATTGACGGGGGCTCACACAAGCGGTGGAGGATGTGGCTTAATTCGAGGCTACGCGAAGAACCTTATCCTAGTCTTGACATGCACGGATTAACCCGGTGAAAGCCGGGCCACGCCTTCGGGTGGAACGTGCACAGGTGCTGCATGGCTGTCGTCAGCTCGTGTCGTGAGATGTCGGGTTAAGTCCCTTAACGAGCGCAACCC	GGATTAGATACCCCGGTAGTCCTAGCTGTAAACGATGAGCACTTGATCGAGGGGCCCCCCATAGCCTCTCGGTCGCAGCGAAAGTGGTAAGTGCTCCGCCTGGGGAGTATGGTCGCAAGGCTGAAACTCAAAGGAATTGACGGGGGCTCACACAAGCGGTGGAGGATGTGGCTTAATTCGAGGCTACGCGAAGAACCTTATCCTAGTCTTGACATGCACGGATTAACCCGGTGAAAGCCGGGCCACGCCTTCGGGTGGAACGTGCACAGGTGCTGCATGGCTGTCGTCAGCTCGTGTCGTGAGATGTCGGGTTAAGTCCCTTAACGAGCGAAACCC	0	0	0	0	0	0	16	21	43	54	134	33.5	48	29	51	35	163	40.75	6	6	9	16	37	9.25	8
Bordetella_1	G	1	0	Litter_1_100176	100	100	N	Bordetella	nt|AB039335.1;rdp|S000457654;silva|AB039335.1.1531	-	-	-	-	-	Bacteria	Proteobacteria	Betaproteobacteria	Burkholderiales	Alcaligenaceae	Bordetella	Bordetella	Litter_1_129510;Litter_1_100176;Litter_1_101721;Litter_1_108574;Litter_1_117337	GGATTAGATACCCTGGTAGTCCACGCCCTAAACGATGTCAACTAGCTGTTGGGGGCTTCGGCCCTTGGTAGCGCAGCTAACGCGTGAAGTTGACCGCCTGGGGAGTACGGTCGCAAGATTAAAACTCAAAGGAATTGACGGGGACCCGCACAAGCGGTGGATGATGTGGATTAATTCGATGCAACGCGAAAAACCTTACCTACCCTTGACATGTCCGGAATCCTGGGGAGACCTGGGAGTGCTCGCAAGAGAACTGGAACACAGGTGCTGCATGGCTGTCGTCAGCTCGTGTCGTGAGATGTTGGGTTAAGTCCCGCAACGAGCGCAACCC	GGATTAGATACCCTGGTAGTCCACGCCCTAAACGATGTCAACTAGCTGTTGGGGGCTTCGGCCCTTGGTAGCGCAGCTAACGCGTGAAGTTGACCGCCTGGGGAGTACGGTCGCAAGATTAAAACTCAAAGGAATTGACGGGGACCCGCACAAGCGGTGGATGATGTGGATTAATTCGATGCAACGCGAAAAACCTTACCTACCCTTGACATGTCCGGAATCCTGGGGAGACCTGGGAGTGCTCGCAAGAGAACTGGAACACAGGTGCTGCATGGCTGTCGTCAGCTCGTGTCGTGAGATGTTGGGTTAAGTCCCGCAACGAGCGCAACCC	0	0	0	0	0	0	3	0	2	1	6	1.5	1	0	0	1	2	0.5	41	67	67	42	217	54.25	77
Bordetella_2	G	1	0	Litter_1_135184	99.094	100	N	Bordetella	nt|EU082144.1	-	-	-	-	-	Bacteria	Proteobacteria	Betaproteobacteria	Burkholderiales	Alcaligenaceae	Bordetella	Bordetella	Litter_1_120545;Litter_1_135184;Litter_1_101060;Litter_1_149534;Litter_1_120870	GGATTAGATACCCTGGTAGTCCACGCCCTAAACGATGTCAACTAGCTGTTGGGGCCTTCGGGCCTTGGTAGCGTAGCTAACGCGTGAAGTTGACCGCCTGGGGAGTACGGTCGCAAGATTAAAACTCAAAGGAATTGACGGGGACCCGCACAAGCGGTGGATGATGTGGATTAATTCGATGCAACGCGAAAAACCTTACCTACCCTTGACATGCCCGGAATCCCGAAGAGATTTGGGAGTGCTCGCAAGAGAACCGGAGCACAGGTGCTGCATGGCTGTCGTCAGCTCGTGTCGTGAGATGTTGGGTTAAGTCCCGCAACGAGCGCAACCC	GGATTAGATACCCTGGTAGTCCACGCCCTAAACGATGTCAACTAGCTGTTGGGGCCTTCGGGCCTTGGTAGCGCAGCTAACGCGTGAAGTTGACCGCCTGGGGAGTACGGTCGCAAGATTAAAACTCAAAGGAATTGACGGGGACCCGCACAAGCGGTGGATGATGTGGATTAATTCGATGCAACGCGAAAAACCTTACCTACCCTTGACATGTCTGGAATCCCGAAGAGATTTGGGAGTGCTCGCAAGAGAACCGGAGCACAGGTGCTGCATGGCTGTCGTCAGCTCGTGTCGTGAGATGTTGGGTTAAGTCCCGCAACGAGCGCAACCC	0	0	0	0	0	0	0	0	0	3	3	0.75	7	8	4	3	22	5.5	8	3	15	14	40	10	12
Bordetella_3	G	4	0	Litter_1_100508	100	100	N	Bordetella	rdp|S001200473;silva|AM930282.1.1491	-	-	-	-	-	Bacteria	Proteobacteria	Betaproteobacteria	Burkholderiales	Alcaligenaceae	Bordetella	Bordetella	Litter_1_100143;Litter_1_100053;Litter_1_100508;Aged_1_128743;Litter_1_68271;Litter_1_102785;Compost_3_112213;Litter_1_101357;Litter_1_10016;Litter_1_134528	GGATTAGATACCCTGGTAGTCCACGCCCTAAACGATGTCAACTAGCTGTTGGGGGCTTCGGCCCTTGGTAGCGCAGCTAACGCGTGAAGTTGACCGCCTGGGGAGTACGGTCGCAAGATTAAAACTCAAAGGAATTGACGGGGACCCGCACAAGCGGTGGATGATGTGGATTAATTCGATGCAACGCGAAAAACCTTACCTACCCTTGACATGTCCGGAATCCTGGGGAGACCTGGGAGTGCTCGCAAGAGAACCGGAACACAGGTGCTGCATGGCTGTCGTCAGCTCGTGTCGTGAGATGTTGGGTTAAGTCCCGCAACGAGCGCAACCC	GGATTAGATACCCTGGTAGTCCACGCCCTAAACGATGTCAACTAGCTGTTGGGGGCTTCGGCCCTTGGTAGCGCAGCTAACGCGTGAAGTTGACCGCCTGGGGAGTACGGTCGCAAGATTAAAACTCAAAGGAATTGACGGGGACCCGCACAAGCGGTGGATGATGTGGATTAATTCGATGCAACGCGAAAAACCTTACCTACCCTTGACATGTCCGGAATCCTGGGGAGACCTGGGAGTGCTCGCAAGAGAACCGGAACACAGGTGCTGCATGGCTGTCGTCAGCTCGTGTCGTGAGATGTTGGGTTAAGTCCCGCAACGAGCGCAACCC	0	0	0	0	0	0	1	0	0	0	1	0.25	0	2	0	0	2	0.5	9	14	12	31	66	16.5	33
Brachybacterium_MS_1	S	1	2	Litter_1_100949	100	100	N	Brachybacterium_conglomeratum;Brachybacterium_paraconglomeratum	16SMicrobial|NR_025502.1;16SMicrobial|NR_104689.1	Bacteria_MS	4	Brachybacterium_conglomeratum;Brachybacterium_faecium;Brachybacterium_paraconglomeratum;Pseudomonas_stutzeri	nt|AB098579.1;nt|AY167842.1;nt|HM481449.1;nt|KP408221.1;silva|AB098579.1.1482;silva|AB537169.1.1458;silva|KP408221.1.1328	100.0/100.0	Bacteria	Actinobacteria	Actinobacteria	Micrococcales	Dermabacteraceae	Brachybacterium	Brachybacterium_MS	Litter_1_111251;Aged_3_3417;Litter_1_100949;Aged_3_142179;Litter_1_1220;Aged_1_159734;Aged_3_16639;Aged_4_19327	GGATTAGATACCCTGGTAGTCCATGCCGTAAACGTTGGGCACTAGGTGTGGGGGACATTCCACGTTTTCCGCGCCGTAGCTAACGCATTAAGTGCCCCGCCTGGGGAGTACGGCCGCAAGGCTAAAACTCAAAGGAATTGACGGGGGCCCGCACAAGCGGCGGAGCATGCTGATTAATTCGATGCAACGCGAAGAACCTTACCAAGGCTTGACATGCACTGGACGGCTGCAGAGATGTGGCTTTCTTTGGACTGGTGCACAGGTGGTGCATGGTTGTCGTCAGCTCGTGTCGTGAGATGTTGGGTTAAGTCCCGCAACGAGCGCAACCC	GGATTAGATACCCTGGTAGTCCATGCCGTAAACGTTGGGCACTAGGTGTGGGGGACATTCCACGTTTTCCGCGCCGTAGCTAACGCATTAAGTGCCCCGCCTGGGGAGTACGGCCGCAAGGCTAAAACTCAAAGGAATTGACGGGGGCCCGCACAAGCGGCGGAGCATGCTGATTAATTCGATGCAACGCGAAGAACCTTACCAAGGCTTGACATGCACTGGACGGCTGCAGAGATGTGGCTTTCTTTGGACTGGTGCACAGGTGGTGCATGGTTGTCGTCAGCTCGTGTCGTGAGATGTTGGGTTAAGTCCCGCAACGAGCGCAACCC	0	0	0	0	0	0	0	0	0	1	1	0.25	20	9	6	21	56	14	225	317	260	215	1017	254.25	112
Bradymonas_1	G	2	0	Litter_1_106586	99.7	100	N	Bradymonas	rdp|S001595981	-	-	-	-	-	Bacteria	Proteobacteria	Deltaproteobacteria	Bradymonadales	Bradymonadaceae	Bradymonas	Bradymonas	Litter_1_106586	GGATTAGATACCCTGGTAGTCCACGCCGTAAACGATGCTTGCTGGTTGTGGCGTTCCATGGTGAATGCCGTAACGAAGCCAACGCGTTAAGCAAGCCGCCTGGGGAGTACGGCCGCAAGGTTAAAACTCAAAGGAATTGACGGGGACCCGCACAAGCGGTGGAGCATGTGGTTTAATTCGAAGCAACGCGAAGAACCTTACCTGGGTTTGACATCTACGGAAGTCGGGGTAATGCCTGATGTGCCCTTCGGGGAGCCGTAAGACAGGTGCTGCATGGCTGTCGTCAGCTCGTGTCGTGAGATGTTCGGTTAAGTCCGGCAACGAGCGCAACCC	GGATTAGATACCCTGGTAGTCCACGCCGTAAACGATGCTTGCTGGTTGTGGCGTTCCATGGTGAATGCCGTAACGAAGCCAACGCGTTAAGCAAGCCGCCTGGGGAGTACGGCCGCAAGGTTAAAACTCAAAGGAATTGACGGGGACCCGCACAAGCGGTGGAGCATGTGGTTTAATTCGAAGCAACGCGAGGAACCTTACCTGGGTTTGACATCTACGGAAGTCGGGGTAATGCCTGATGTGCCCTTCGGGGAGCCGTAAGACAGGTGCTGCATGGCTGTCGTCAGCTCGTGTCGTGAGATGTTCGGTTAAGTCCGGCAACGAGCGCAACCC	2	0	0	0	2	0.5	35	35	24	55	149	37.25	29	24	27	17	97	24.25	1	2	0	3	6	1.5	2
Bradyrhizobium_1	G	1	0	Compost_1_100509	100	100	N	Bradyrhizobium	nt|KX838334.1;rdp|S001598382;silva|EU907901.1.1121	-	-	-	-	-	Bacteria	Proteobacteria	Alphaproteobacteria	Rhizobiales	Bradyrhizobiaceae	Bradyrhizobium	Bradyrhizobium	Compost_1_109220;Compost_1_100509;Compost_1_147038;Compost_1_107427;Compost_1_105687	GGATTAGATACCCTGGTAGTCCACGCCGTAAACGATGAATGCCAGCCGTTAGTGGGTTTACTCACTAGTGGCGCAGCTAACGCTTTAAGCATTCCGCCTGGGGAGTACGGTCGCAAGATTAAAACTCAAAGGAATTGACGGGGGCCCGCACAAGCGGTGGAGCATGTGGTTTAATTCGACGCAACGCGAAGAACCTTACCAGCCCTTGACATCCCGGTCGCGGATTCCAGAGACGGAATCCTTCAGTTCGGCTGGACCGGAGACAGGTGCTGCATGGCTGTCGTCAGCTCGTGTCGTGAGATGTTGGGTTAAGTCCCGCAACGAGCGCAACCC	GGATTAGATACCCTGGTAGTCCACGCCGTAAACGATGAATGCCAGCCGTTAGTGGGTTTACTCACTAGTGGCGCAGCTAACGCTTTAAGCATTCCGCCTGGGGAGTACGGTCGCAAGATTAAAACTCAAAGGAATTGACGGGGGCCCGCACAAGCGGTGGAGCATGTGGTTTAATTCGACGCAACGCGAAGAACCTTACCAGCCCTTGACATCCCGGTCGCGGATTCCAGAGACGGAATCCTTCAGTTCGGCTGGACCGGAGACAGGTGCTGCATGGCTGTCGTCAGCTCGTGTCGTGAGATGTTGGGTTAAGTCCCGCAACGAGCGCAACCC	0	0	0	0	0	0	6	0	4	5	15	3.75	5	8	5	1	19	4.75	12	7	11	17	47	11.75	9
Brevibacillus_1	G	1	0	Compost_1_37027	100	100	N	Brevibacillus	nt|CP034541.1	-	-	-	-	-	Bacteria	Firmicutes	Bacilli	Bacillales	Paenibacillaceae	Brevibacillus	Brevibacillus	Compost_1_37027	GGATTAGATACCCTGGTAGTCCACGCCGTAAACGATGAGTGCTAGGTGTTGGGGGTTTTGACACCCTCAGTGCCGCAGCTAACGCAATAAGCACTCCGCCTGGGGAGTACGGTCGCAAGACTGAAACTCAAAGGAATTGACGGGGGCCCGCACAAGCGGTGGAGCATGTGGTTTAATTCGAAGCAACGCGAAGAACCTTACCAGGTCTTGACATCCCGCTGACCGCTCCAGAGATGGGGCTTCCCTTCGGGGCAGCGGTGACAGGTGGTGCATGGTTGTCGTCAGCTCGTGTCGTGAGATGTTGGGTTAAGTCCCGCAACGAGCGCGACCC	GGATTAGATACCCTGGTAGTCCACGCCGTAAACGATGAGTGCTAGGTGTTGGGGGTTTTGACACCCTCAGTGCCGCAGCTAACGCAATAAGCACTCCGCCTGGGGAGTACGGTCGCAAGACTGAAACTCAAAGGAATTGACGGGGGCCCGCACAAGCGGTGGAGCATGTGGTTTAATTCGAAGCAACGCGAAGAACCTTACCAGGTCTTGACATCCCGCTGACCGCTCCAGAGATGGGGCTTCCCTTCGGGGCAGCGGTGACAGGTGGTGCATGGTTGTCGTCAGCTCGTGTCGTGAGATGTTGGGTTAAGTCCCGCAACGAGCGCAACCC	0	0	0	0	0	0	0	0	0	0	0	0	0	0	0	0	0	0	2	0	0	0	2	0.5	14
Brevibacillus_2	G	2	0	Aged_2_116937	99.396	100	N	Brevibacillus	nt|CP034541.1;rdp|S003322897;silva|AB744314.1.619	-	-	-	-	-	Bacteria	Firmicutes	Bacilli	Bacillales	Paenibacillaceae	Brevibacillus	Brevibacillus	Aged_1_144194;Aged_2_116937;Aged_1_51460;Aged_1_121843;Aged_2_114484	GGATTAGATACCCTGGTAGTCCACGCCGTAAACGATGAGTGCTAGGTGTTGGGGGTTTTGACACCCTCAGTGCCGCAGCTAACGCAATAAGCACTCCGCCTGGGGAGTACGCTCGCAAGAGTGAAACTCAAAGGAATTGACGGGGGCCCGCACAAGCGGTGGAGCATGTGGTTTAATTCGAAGCAACGCGAAGAACCTTACCAGGTCTTGACATCCCGCTGACCGCTCCAGAGATGGGGCTTCCCTTCGGGGCAGCGGTGACAGGTGGTGCATGGTTGTCGTCAGCTCGTGTCGTGAGATGTTGGGTTAAGTCCCGCAACGAGCGCAACCC	GGATTAGATACCCTGGTAGTCCACGCCGTAAACGATGAGTGCTAGGTGTTGGGGGTTTTGACACCCTCAGTGCCGCAGCTAACGCAATAAGCACTCCGCCTGGGGAGTACGGTCGCAAGACTGAAACTCAAAGGAATTGACGGGGGCCCGCACAAGCGGTGGAGCATGTGGTTTAATTCGAAGCAACGCGAAGAACCTTACCAGGTCTTGACATCCCGCTGACCGCTCCAGAGATGGGGCTTCCCTTCGGGGCAGCGGTGACAGGTGGTGCATGGTTGTCGTCAGCTCGTGTCGTGAGATGTTGGGTTAAGTCCCGCAACGAGCGCAACCC	0	0	0	0	0	0	0	0	0	0	0	0	0	0	0	0	0	0	11	8	11	13	43	10.75	24
Brevibacillus_3	G	4	0	Aged_1_33132	99.698	100	N	Brevibacillus	rdp|S003322897;silva|AB744314.1.619	-	-	-	-	-	Bacteria	Firmicutes	Bacilli	Bacillales	Paenibacillaceae	Brevibacillus	Brevibacillus	Aged_1_154142;Aged_1_33132;Aged_1_109969;Aged_1_100974	GGATTAGATACCCTGGTAGTCCACGCCGTAAACGATGAGTGCTAGGTGTTGGGGGTTTTGACACCCTCAGTGCCGCAGCTAACGCAATAAGCACTCCGCCTGGGGAGTACGCTCGCAAGAGTGAAACTCAAAGGAATTGACGGGGGCCCGCACAAGCGGTGGAGCATGTGGTTTAATTCGAAGCAACGCGAAGAACCTTACCAGGTCTTGACATCCCGCTGACCGCTCCAGAGATGGAGCTTCCCTTCGGGGCAGCGGTGACAGGTGGTGCATGGTTGTCGTCAGCTCGTGTCGTGAGATGTTGGGTTAAGTCCCGCAACGAGCGCGACCC	GGATTAGATACCCTGGTAGTCCACGCCGTAAACGATGAGTGCTAGGTGTTGGGGGTTTTGACACCCTCAGTGCCGCAGCTAACGCAATAAGCACTCCGCCTGGGGAGTACGCTCGCAAGAGTGAAACTCAAAGGAATTGACGGGGGCCCGCACAAGCGGTGGAGCATGTGGTTTAATTCGAAGCAACGCGAAGAACCTTACCAGGTCTTGACATCCCGCTGACCACTCCAGAGATGGAGCTTCCCTTCGGGGCAGCGGTGACAGGTGGTGCATGGTTGTCGTCAGCTCGTGTCGTGAGATGTTGGGTTAAGTCCCGCAACGAGCGCAACCC	0	0	0	0	0	0	17	2	4	36	59	14.75	29	26	26	19	100	25	7	9	6	10	32	8	0
Brevibacillus_4	G	1	0	Aged_2_127447	100	100	N	Brevibacillus	silva|HM635210.1.1101	-	-	-	-	-	Bacteria	Firmicutes	Bacilli	Bacillales	Paenibacillaceae	Brevibacillus	Brevibacillus	Aged_2_127447;Aged_1_57067;Aged_3_93678	GGATTAGATACCCTGGTAGTCCTAGCCGTAAACGATGGGTACTAGGTGTAGGTGGTTTCGATACCATCTGTGCCGCAGTTAACGCAATAAGTACCCCGCCTGGGGAGTACGTGCGCAAGCATGAAACTCAAAGGAATTGACGGGGGCCCGCACAAGCGGTGGAGCATGTGGTTTAATTCGAAGCAACGCGAAGAACCTTACCAGGGCTTGACATCCCTTGACCGCCATGGAAACATGGTTTCTCTTCGGAGCAAGGAGACAGGTGGTGCATGGTTGTCGTCAGCTCGTGTCGTGAGATGTTGGGTTAAGTCCCGCAACGAGCGCAACCC	GGATTAGATACCCTGGTAGTCCTAGCCGTAAACGATGGGTACTAGGTGTAGGTGGTTTCGATACCATCTGTGCCGCAGTTAACGCAATAAGTACCCCGCCTGGGGAGTACGTGCGCAAGCATGAAACTCAAAGGAATTGACGGGGGCCCGCACAAGCGGTGGAGCATGTGGTTTAATTCGAAGCAACGCGAAGAACCTTACCAGGGCTTGACATCCCTTGACCGCCATGGAAACATGGTTTCTCTTCGGAGCAAGGAGACAGGTGGTGCATGGTTGTCGTCAGCTCGTGTCGTGAGATGTTGGGTTAAGTCCCGCAACGAGCGCAACCC	0	0	0	0	0	0	0	0	0	0	0	0	0	0	1	0	1	0.25	15	0	5	2	22	5.5	42
Brevibacillus_aydinogluensis_1	S	2	0	Aged_2_146930	100	100	N	Brevibacillus_aydinogluensis	16SMicrobial|NR_117986.1	Brevibacillus_aydinogluensis	0	Brevibacillus_aydinogluensis	nt|NR_117986.1;silva|HQ419073.1.1425	100.0/100.0;99.096/100.0	Bacteria	Firmicutes	Bacilli	Bacillales	Paenibacillaceae	Brevibacillus	Brevibacillus_aydinogluensis	Aged_2_7802;Aged_3_114109;Aged_2_146930;Aged_2_19164;Aged_4_189005;Aged_4_49310;Aged_1_58792;Aged_1_40507	GGATTAGATACCCTGGTAGTCCACGCCGTAAACGATGAGTGCTAGGTGTTGGGGGTTTCAACACCCTCAGTGCCGCAGCTAACGCAATAAGCACTCCGCCTGGGGAGTACGCTCGCAAGAGTGAAACTCAAAGGAATTGACGGGGGCCCGCACAAGCGGTGGAGCATGTGGTTTAATTCGAAGCAACGCGAAGAACCTTACCAGGTCTTGACATCCCGCTGACCGTCCTAGAGATAGGGCTTCCCTTCGGGGCAGCGGTGACAGGTGGTGCATGGTTGTCGTCAGCTCGTGTCGTGAGATGTTGGGTTAAGTCCCGCAACGAGCGCAACCC	GGATTAGATACCCTGGTAGTCCACGCCGTAAACGATGAGTGCTAGGTGTTGGGGGTTTCAACACCCTCAGTGCCGCAGCTAACGCAATAAGCACTCCGCCTGGGGAGTACGCTCGCAAGAGTGAAACTCAAAGGAATTGACGGGGGCCCGCACAAGCGGTGGAGCATGTGGTTTAATTCGAAGCAACGCGAAGAACCTTACCAGGTCTTGACATCCCGCTGACCGTCCTAGAGATAGGGCTTCCCTTCGGGGCAGCGGTGACAGGTGGTGCATGGTTGTCGTCAGCTCGTGTCGTGAGATGTTGGGTTAAGTCCCGCAACGAGCGCAACCC	0	0	0	0	0	0	0	0	0	0	0	0	0	1	0	2	3	0.75	11	3	15	10	39	9.75	8
Brevibacillus_borstelensis_1	S	1	0	Aged_1_100074	100	100	N	Brevibacillus_borstelensis	16SMicrobial|NR_029131.1	Bacillales_MS	6	Aeribacillus_pallidus;Brevibacillus_agri;Brevibacillus_borstelensis;Brevibacillus_brevis;Brevibacillus_formosus;Brevibacillus_thermoruber	nt|AB116134.1;nt|HM011262.1;nt|LC107486.1;nt|LC157907.1;nt|LN681602.1;silva|AB112721.1.1486;silva|HM011262.1.1430;silva|KC120910.1.864;silva|LF133444.1.1029	100.0/100.0	Bacteria	Firmicutes	Bacilli	Bacillales	Paenibacillaceae	Brevibacillus	Brevibacillus_borstelensis	Aged_1_146477;Aged_1_11184;Aged_1_100074;Aged_1_111545;Aged_1_108538;Aged_1_118976;Aged_1_112822;Aged_1_132081	GGATTAGATACCCTGGTAGTCCACGCCGTAAACGATGAGTGCTAGGTGTTGGGGGTTTCAATACCCTCAGTGCCGCAGCTAACGCAATAAGCACTCCGCCTGGGGAGTACGCTCGCAAGAGTGAAACTCAAAGGAATTGACGGGGGCCCGCACAAGCGGTGGAGCATGTGGTTTAATTCGAAGCAACGCGAAGAACCTTACCAGGTCTTGACATCCCGCTGACCGTCCTAGAGATAGGGCTTCCCTTCGGGGCAGCGGTGACAGGTGGTGCATGGTTGTCGTCAGCTCGTGTCGTGAGATGTTGGGTTAAGTCCCGCAACGAGCGCAACCC	GGATTAGATACCCTGGTAGTCCACGCCGTAAACGATGAGTGCTAGGTGTTGGGGGTTTCAATACCCTCAGTGCCGCAGCTAACGCAATAAGCACTCCGCCTGGGGAGTACGCTCGCAAGAGTGAAACTCAAAGGAATTGACGGGGGCCCGCACAAGCGGTGGAGCATGTGGTTTAATTCGAAGCAACGCGAAGAACCTTACCAGGTCTTGACATCCCGCTGACCGTCCTAGAGATAGGGCTTCCCTTCGGGGCAGCGGTGACAGGTGGTGCATGGTTGTCGTCAGCTCGTGTCGTGAGATGTTGGGTTAAGTCCCGCAACGAGCGCAACCC	0	0	0	0	0	0	1	0	0	0	1	0.25	7	3	9	7	26	6.5	22	23	13	30	88	22	23
Brevibacillus_brevis_1	S	1	0	Aged_2_93732	100	100	N	Brevibacillus_brevis	nt|KM087328.1;silva|KM087328.1.1528	-	-	-	-	-	Bacteria	Firmicutes	Bacilli	Bacillales	Paenibacillaceae	Brevibacillus	Brevibacillus_brevis	Aged_2_93732;Aged_2_120096;Aged_4_98593	GGATTAGATACCCTGGTAGTCCACGCCGTAAACGATGAGTGCTAGGTGTTGGGGGTTTCAATACCCTCAGTGCCGCAGCTAACGCAATAAGCACTCCGCCTGGGGAGTACGCTCGCAAGAGTGAAACTCAAAGGAATTGACGGGGGCCCGCACAAGCGGTGGAGCATGTGGTTTAATTCGAAGCAACGCGAAGAACCTTACCAGGTCTTGACATCCCGCTGGCCGCTCTGGAGACAGAGCTTCCCTTCGGGGCAGCGGTGACAGGTGGTGCATGGTTGTCGTCAGCTCGTGTCGTGAGATGTTGGGTTAAGTCCCGCAACGAGCGCAACCC	GGATTAGATACCCTGGTAGTCCACGCCGTAAACGATGAGTGCTAGGTGTTGGGGGTTTCAATACCCTCAGTGCCGCAGCTAACGCAATAAGCACTCCGCCTGGGGAGTACGCTCGCAAGAGTGAAACTCAAAGGAATTGACGGGGGCCCGCACAAGCGGTGGAGCATGTGGTTTAATTCGAAGCAACGCGAAGAACCTTACCAGGTCTTGACATCCCGCTGGCCGCTCTGGAGACAGAGCTTCCCTTCGGGGCAGCGGTGACAGGTGGTGCATGGTTGTCGTCAGCTCGTGTCGTGAGATGTTGGGTTAAGTCCCGCAACGAGCGCAACCC	0	0	0	0	0	0	0	1	0	0	1	0.25	0	0	0	1	1	0.25	8	9	9	12	38	9.5	18
Brevibacillus_invocatus_1	S	1	0	Aged_3_13212	100	100	N	Brevibacillus_invocatus	16SMicrobial|NR_041836.1	Brevibacillus_invocatus	0	Brevibacillus_invocatus	nt|AF378231.1;silva|AB112718.1.1488	100.0/100.0	Bacteria	Firmicutes	Bacilli	Bacillales	Paenibacillaceae	Brevibacillus	Brevibacillus_invocatus	Aged_3_13212;Aged_1_157922;Aged_1_68879;Aged_1_110388	GGATTAGATACCCTGGTAGTCCACGCCGTAAACGATGAGTGCTAGGTGTTAGGGGTTTCAATACCCTTAGTGCCGCAGCTAACGCAATAAGCACTCCGCCTGGGGAGTACGGTCGCAAGACTGAAACTCAAAGGAATTGACGGGGGCCCGCACAAGCGGTGGAGCATGTGGTTTAATTCGAAGCAACGCGAAGAACCTTACCAGGTCTTGACATCCCGCTGACCGCTCTGGAGACAGAGCTTCCCTTCGGGGCAGCGGTGACAGGTGGTGCATGGTTGTCGTCAGCTCGTGTCGTGAGATGTTGGGTTAAGTCCCGCAACGAGCGCAACCC	GGATTAGATACCCTGGTAGTCCACGCCGTAAACGATGAGTGCTAGGTGTTAGGGGTTTCAATACCCTTAGTGCCGCAGCTAACGCAATAAGCACTCCGCCTGGGGAGTACGGTCGCAAGACTGAAACTCAAAGGAATTGACGGGGGCCCGCACAAGCGGTGGAGCATGTGGTTTAATTCGAAGCAACGCGAAGAACCTTACCAGGTCTTGACATCCCGCTGACCGCTCTGGAGACAGAGCTTCCCTTCGGGGCAGCGGTGACAGGTGGTGCATGGTTGTCGTCAGCTCGTGTCGTGAGATGTTGGGTTAAGTCCCGCAACGAGCGCAACCC	0	0	0	0	0	0	0	0	0	0	0	0	0	0	0	0	0	0	7	12	24	6	49	12.25	6
Brevibacillus_limnophilus_1	S	2	0	Aged_1_124162	100	100	N	Brevibacillus_limnophilus	nt|KF817655.1;silva|KF817655.1.1396	-	-	-	-	-	Bacteria	Firmicutes	Bacilli	Bacillales	Paenibacillaceae	Brevibacillus	Brevibacillus_limnophilus	Aged_2_118671;Aged_1_124162;Aged_2_106747;Aged_2_68125;Aged_3_51371;Aged_2_102923	GGATTAGATACCCTGGTAGTCCACGCCGTAAACGATGAGTGCTAGGTGTTGGGGGTTTCAATACCCTCAGTGCCGCAGCTAACGCAATAAGCACTCCGCCTGGGGAGTACGCTCGCAAGAGTGAAACTCAAAGGAATTGACGGGGGCCCGCACAAGCGGTGGAGCATGTGGTTTAATTCGAAGCAACGCGAAGAACCTTACCAGGTCTTGACATCCCGCTGACCGCTCTGGAGACAGGGCTTCCCTTCGGGGCAGCGGTGACAGGTGGTGCATGGTTGTCGTCAGCTCGTGTCGTGAGATGTTGGGTTAAGTCCCGCAACGAGCGCAACCC	GGATTAGATACCCTGGTAGTCCACGCCGTAAACGATGAGTGCTAGGTGTTGGGGGTTTCAATACCCTCAGTGCCGCAGCTAACGCAATAAGCACTCCGCCTGGGGAGTACGCTCGCAAGAGTGAAACTCAAAGGAATTGACGGGGGCCCGCACAAGCGGTGGAGCATGTGGTTTAATTCGAAGCAACGCGAAGAACCTTACCAGGTCTTGACATCCCGCTGACCGCTCTGGAGACAGGGCTTCCCTTCGGGGCAGCGGTGACAGGTGGTGCATGGTTGTCGTCAGCTCGTGTCGTGAGATGTTGGGTTAAGTCCCGCAACGAGCGCAACCC	12	0	0	0	12	3	26	5	0	6	37	9.25	49	30	74	140	293	73.25	877	1500	1476	1624	5477	1369.25	914
Brevibacillus_massiliensis_1	S	1	0	Aged_1_102683	100	100	N	Brevibacillus_massiliensis	16SMicrobial|NR_118322.1	Brevibacillus_massiliensis	0	Brevibacillus_massiliensis	nt|NR_118322.1;silva|JN837488.1.1477	100.0/100.0	Bacteria	Firmicutes	Bacilli	Bacillales	Paenibacillaceae	Brevibacillus	Brevibacillus_massiliensis	Aged_1_101879;Aged_1_126613;Aged_1_102683;Aged_1_105168;Aged_1_10361;Aged_1_102347;Aged_1_102311;Aged_1_100152	GGATTAGATACCCTGGTAGTCCACGCCGTAAACGATGAGTGCTAGGTGTTGGGGGTTTCGATACCCTCAGTGCCGCAGCTAACGCAATAAGCACTCCGCCTGGGGAGTACGCTCGCAAGAGTGAAACTCAAAGGAATTGACGGGGGCCCGCACAAGCGGTGGAGCATGTGGTTTAATTCGAAGCAACGCGAAGAACCTTACCAGGTCTTGACATCCCGCTGACCGTCCTGGAGACAGGGCTTCCCTTCGGGGCAGCGGTGACAGGTGGTGCATGGTTGTCGTCAGCTCGTGTCGTGAGATGTTGGGTTAAGTCCCGCAACGAGCGCAACCC	GGATTAGATACCCTGGTAGTCCACGCCGTAAACGATGAGTGCTAGGTGTTGGGGGTTTCGATACCCTCAGTGCCGCAGCTAACGCAATAAGCACTCCGCCTGGGGAGTACGCTCGCAAGAGTGAAACTCAAAGGAATTGACGGGGGCCCGCACAAGCGGTGGAGCATGTGGTTTAATTCGAAGCAACGCGAAGAACCTTACCAGGTCTTGACATCCCGCTGACCGTCCTGGAGACAGGGCTTCCCTTCGGGGCAGCGGTGACAGGTGGTGCATGGTTGTCGTCAGCTCGTGTCGTGAGATGTTGGGTTAAGTCCCGCAACGAGCGCAACCC	0	0	0	0	0	0	0	2	6	3	11	2.75	7	6	6	18	37	9.25	5	0	7	1	13	3.25	3
Brevibacillus_MS_1	S	1	14	Aged_1_133005	99.094	100	N	Brevibacillus_agri;Brevibacillus_aydinogluensis;Brevibacillus_brevis;Brevibacillus_centrosporus;Brevibacillus_choshinensis;Brevibacillus_fluminis;Brevibacillus_formosus;Brevibacillus_gelatini;Brevibacillus_limnophilus;Brevibacillus_massiliensis;Brevibacillus_nitrificans;Brevibacillus_parabrevis;Brevibacillus_reuszeri;Brevibacillus_thermoruber	16SMicrobial|NR_024822.1;16SMicrobial|NR_040979.1;16SMicrobial|NR_040980.1;16SMicrobial|NR_040981.1;16SMicrobial|NR_040983.1;16SMicrobial|NR_041524.1;16SMicrobial|NR_112211.1;16SMicrobial|NR_112213.1;16SMicrobial|NR_112926.1;16SMicrobial|NR_113802.1;16SMicrobial|NR_116293.1	-	-	-	-	-	Bacteria	Firmicutes	Bacilli	Bacillales	Paenibacillaceae	Brevibacillus	Brevibacillus_MS	Aged_1_133528;Aged_1_12525;Aged_1_133005;Aged_2_13004;Aged_3_55492;Aged_3_154823;Aged_1_3705;Aged_1_11028	GGATTAGATACCCTGGTAGTCCACGCCGTAAACGATGAGTGCTAGGTGTTGGGGGTTTCAACACCCTCAGTGCCGCAGCTAACGCAATAAGCACTCCGCCTGGGGAGTACGCTCGCAAGAGTGAAACTCAAAGGAATTGACGGGGGCCCGCACAAGCGGTGGAGCATGTGGTTTAATTCGAAGCAACGCGAAGAACCTTACCAGGTCTTGACATCCCGCTGACCGCCCTGGAGACAGGGCTTCCCTTCGGGGCAGCGGTGACAGGTGGTGCATGGTTGTCGTCAGCTCGTGTCGTGAGATGTTGGGTTAAGTCCCGCAACGAGCGCAACCC	GGATTAGATACCCTGGTAGTCCACGCCGTAAACGATGAGTGCTAGGTGTTGGGGGTTTCAATACCCTCAGTGCCGCAGCTAACGCAATAAGCACTCCGCCTGGGGAGTACGCTCGCAAGAGTGAAACTCAAAGGAATTGACGGGGGCCCGCACAAGCGGTGGAGCATGTGGTTTAATTCGAAGCAACGCGAAGAACCTTACCAGGTCTTGACATCCCGCTGACCGCTCTGGAGACAGAGCTTCCCTTCGGGGCAGCGGTGACAGGTGGTGCATGGTTGTCGTCAGCTCGTGTCGTGAGATGTTGGGTTAAGTCCCGCAACGAGCGCAACCC	0	0	0	0	0	0	4	0	3	3	10	2.5	10	3	8	13	34	8.5	22	21	33	134	210	52.5	11
Brevibacillus_MS_2	S	1	11	Aged_1_100644	100	100	N	Brevibacillus_agri;Brevibacillus_brevis;Brevibacillus_centrosporus;Brevibacillus_choshinensis;Brevibacillus_fluminis;Brevibacillus_formosus;Brevibacillus_gelatini;Brevibacillus_limnophilus;Brevibacillus_nitrificans;Brevibacillus_parabrevis;Brevibacillus_reuszeri	16SMicrobial|NR_024822.1;16SMicrobial|NR_040979.1;16SMicrobial|NR_040980.1;16SMicrobial|NR_040981.1;16SMicrobial|NR_040983.1;16SMicrobial|NR_041524.1;16SMicrobial|NR_112211.1;16SMicrobial|NR_112926.1;16SMicrobial|NR_113802.1;16SMicrobial|NR_116293.1;16SMicrobial|NR_148616.1	Bacillales_MS	15	Aneurinibacillus_aneurinilyticus;Bacillus_amyloliquefaciens;Bacillus_flexus;Brevibacillus_agri;Brevibacillus_brevis;Brevibacillus_centrosporus;Brevibacillus_choshinensis;Brevibacillus_fluminis;Brevibacillus_formosus;Brevibacillus_gelatini;Brevibacillus_levickii;Brevibacillus_limnophilus;Brevibacillus_nitrificans;Brevibacillus_parabrevis;Brevibacillus_reuszeri	nt|AB680065.1;nt|AB680888.1;nt|AB681205.1;nt|CP018145.1;nt|HQ831405.1;nt|HQ844458.1;nt|JN663805.1;nt|JN999877.1;nt|JX992848.1;nt|KF817652.1;nt|KM894191.1;silva|AB039334.1.1532;silva|AB101593.1.1486;silva|AB112712.1.1486;silva|AB112713.1.1486;silva|AB112714.1.1486;silva|AB112717.1.1501;silva|AB112719.1.1486;silva|AB507254.1.1491;silva|AB680946.1.1461;silva|EU375457.1.1413;silva|JX992848.1.916	100.0/100.0	Bacteria	Firmicutes	Bacilli	Bacillales	Paenibacillaceae	Brevibacillus	Brevibacillus_MS	Aged_1_156533;Aged_1_120944;Aged_1_100644;Aged_1_100805;Aged_2_109241;Aged_1_32888;Aged_1_119800;Aged_1_109806	GGATTAGATACCCTGGTAGTCCACGCCGTAAACGATGAGTGCTAGGTGTTGGGGGTTTCAATACCCTCAGTGCCGCAGCTAACGCAATAAGCACTCCGCCTGGGGAGTACGCTCGCAAGAGTGAAACTCAAAGGAATTGACGGGGGCCCGCACAAGCGGTGGAGCATGTGGTTTAATTCGAAGCAACGCGAAGAACCTTACCAGGTCTTGACATCCCGCTGACCGCTCTGGAGACAGAGCTTCCCTTCGGGGCAGCGGTGACAGGTGGTGCATGGTTGTCGTCAGCTCGTGTCGTGAGATGTTGGGTTAAGTCCCGCAACGAGCGCAACCC	GGATTAGATACCCTGGTAGTCCACGCCGTAAACGATGAGTGCTAGGTGTTGGGGGTTTCAATACCCTCAGTGCCGCAGCTAACGCAATAAGCACTCCGCCTGGGGAGTACGCTCGCAAGAGTGAAACTCAAAGGAATTGACGGGGGCCCGCACAAGCGGTGGAGCATGTGGTTTAATTCGAAGCAACGCGAAGAACCTTACCAGGTCTTGACATCCCGCTGACCGCTCTGGAGACAGAGCTTCCCTTCGGGGCAGCGGTGACAGGTGGTGCATGGTTGTCGTCAGCTCGTGTCGTGAGATGTTGGGTTAAGTCCCGCAACGAGCGCAACCC	0	0	0	0	0	0	0	0	0	1	1	0.25	0	2	8	0	10	2.5	1	93	5	8	107	26.75	42
Brevibacillus_MS_3	S	1	2	Aged_4_121031	100	100	N	Brevibacillus_brevis;Brevibacillus_fluminis	nt|CP030117.1;nt|KY515403.1;silva|EU272855.1.1368;silva|KY515403.1.1442	-	-	-	-	-	Bacteria	Firmicutes	Bacilli	Bacillales	Paenibacillaceae	Brevibacillus	Brevibacillus_MS	Aged_4_121031	GGATTAGATACCCTGGTAGTCCACGCCGTAAACGATGAGTGCTAGGTGTTGGGGGTTTCAATACCCTCAGTGCCGCAGCTAACGCAATAAGCACTCCGCCTGGGGAGTACGCTCGCAAGAGTGAAACTCAAAGGAATTGACGGGGGCCCGCACAAGCGGTGGAGCATGTGGTTTAATTCGAAGCAACGCGAAGAACCTTACCAGGTCTTGACATCCCGCTGATCGCTCTGGAGACAGAGCTTCCCTTCGGGGCAGCGGTGACAGGTGGTGCATGGTTGTCGTCAGCTCGTGTCGTGAGATGTTGGGTTAAGTCCCGCAACGAGCGCAACCC	GGATTAGATACCCTGGTAGTCCACGCCGTAAACGATGAGTGCTAGGTGTTGGGGGTTTCAATACCCTCAGTGCCGCAGCTAACGCAATAAGCACTCCGCCTGGGGAGTACGCTCGCAAGAGTGAAACTCAAAGGAATTGACGGGGGCCCGCACAAGCGGTGGAGCATGTGGTTTAATTCGAAGCAACGCGAAGAACCTTACCAGGTCTTGACATCCCGCTGATCGCTCTGGAGACAGAGCTTCCCTTCGGGGCAGCGGTGACAGGTGGTGCATGGTTGTCGTCAGCTCGTGTCGTGAGATGTTGGGTTAAGTCCCGCAACGAGCGCAACCC	0	0	0	0	0	0	24	7	6	34	71	17.75	29	136	52	16	233	58.25	5	2	14	15	36	9	3
Brevibacillus_panacihumi_1	S	5	0	Aged_1_139175	100	100	N	Brevibacillus_panacihumi	16SMicrobial|NR_044485.1	Brevibacillus_MS	3	Brevibacillus_borstelensis;Brevibacillus_invocatus;Brevibacillus_panacihumi	nt|EU383032.1;nt|EU730932.1;nt|MF193502.1;silva|AYJU01000003.258502.260037;silva|EU730932.1.1435	100.0/100.0;99.094/100.0;99.396/100.0;99.698/100.0	Bacteria	Firmicutes	Bacilli	Bacillales	Paenibacillaceae	Brevibacillus	Brevibacillus_panacihumi	Aged_2_8882;Aged_4_125509;Aged_1_139175;Aged_1_156955;Aged_1_33398;Aged_1_76463;Aged_1_18855;Aged_2_85168	GGATTAGATACCCTGGTAGTCCACGCCGTAAACGATGAGTGCTAGGTGTTGGGGGTTTCAATACCCTCAGTGCCGCAGCTAACGCAATAAGCACTCCGCCTGGGGAGTACGGTCGCAAGACTGAAACTCAAAGGAATTGACGGGGGCCCGCACAAGCGGTGGAGCATGTGGTTTAATTCGAAGCAACGCGAAGAACCTTACCAGGTCTTGACATCCCGCTGACCGCTCTGGAGACAGAGCTTCCCTTCGGGGCAGCGGTGACAGGTGGTGCATGGTTGTCGTCAGCTCGTGTCGTGAGATGTTGGGTTAAGTCCCGCAACGAGCGCAACCC	GGATTAGATACCCTGGTAGTCCACGCCGTAAACGATGAGTGCTAGGTGTTGGGGGTTTCAATACCCTCAGTGCCGCAGCTAACGCAATAAGCACTCCGCCTGGGGAGTACGGTCGCAAGACTGAAACTCAAAGGAATTGACGGGGGCCCGCACAAGCGGTGGAGCATGTGGTTTAATTCGAAGCAACGCGAAGAACCTTACCAGGTCTTGACATCCCGCTGACCGCTCTGGAGACAGAGCTTCCCTTCGGGGCAGCGGTGACAGGTGGTGCATGGTTGTCGTCAGCTCGTGTCGTGAGATGTTGGGTTAAGTCCCGCAACGAGCGCAACCC	0	0	0	0	0	0	0	0	2	0	2	0.5	0	2	0	3	5	1.25	10	1	6	8	25	6.25	46
Brevibacillus_panacihumi_2	S	1	0	Aged_1_106348	99.094	100	N	Brevibacillus_panacihumi	nt|KF626524.1	-	-	-	-	-	Bacteria	Firmicutes	Bacilli	Bacillales	Paenibacillaceae	Brevibacillus	Brevibacillus_panacihumi	Aged_1_117561;Aged_1_106348	GGCTTAGATACCCTGGTAGTCCACGCCGTAAACGATGAGTGCTAGGTGTTGGGGGTTTCGATACCCTCAGTGCCGCAGCTAACGCAATAAGCACTCCGCCTGGGGAGTACGCTCGCAAGAGTGAAACTCAAAGGAATTGACGGGGGCCCGCACAAGCGGTGGAGCATGTGGTTTAATTCGAAGCAACGCGAAGAACCTTACCAGGTCTTGACATCCCGCTGACCGCTCCAGAGATGGGGCTTCCCTTCGGGGCAGCGGTGACAGGTGGTGCATGGTTGTCGTCAGCTCGTGTCGTGAGATGTTGGGTTAAGTCCCGCAACGAGCGCGACCC	GGATTAGATACCCTGGTAGTCCACGCCGTAAACGATGAGTGCTAGGTGTTGGGGGTTTCAATACCCTCAGTGCCGCAGCTAACGCAATAAGCACTCCGCCTGGGGAGTACGCTCGCAAGAGTGAAACTCAAAGGAATTGACGGGGGCCCGCACAAGCGGTGGAGCATGTGGTTTAATTCGAAGCAACGCGAAGAACCTTACCAGGTCTTGACATCCCGCTGACCGCTCTAGAGATAGGGCTTCCCTTCGGGGCAGCGGTGACAGGTGGTGCATGGTTGTCGTCAGCTCGTGTCGTGAGATGTTGGGTTAAGTCCCGCAACGAGCGCAACCC	0	0	0	0	0	0	3	11	29	17	60	15	6	17	8	17	48	12	33	14	5	11	63	15.75	15
Brevibacillus_panacihumi_3	S	2	0	Aged_1_159269	99.396	100	N	Brevibacillus_panacihumi	nt|KF626524.1;silva|KF626524.1.1432	-	-	-	-	-	Bacteria	Firmicutes	Bacilli	Bacillales	Paenibacillaceae	Brevibacillus	Brevibacillus_panacihumi	Aged_1_147013;Aged_3_45486;Aged_1_159269;Aged_1_128036;Aged_1_110847;Aged_2_145863	GGATTAGATACCCTGGTAGTCCACGCCGTAAACGATGAGTGCTAGGTGTTGGGGGTTTCAATACCCTCAGTGCCGCAGCTAACGCAATAAGCACTCCGCCTGGGGAGTACGCTCGCAAGAGTGAAACTCAAAGGAATTGACGGGGGCCCGCACAAGCGGTGGAGCATGTGGTTTAATTCGAAGCAACGCGAAGAACCTTACCAGGTCTTGACATCCCGCTGACCGCTCCAGAGATGGGGCTTCCCTTCGGGGCAGCGGTGACAGGTGGTGCATGGTTGTCGTCAGCTCGTGTCGTGAGATGTTGGGTTAAGTCCCGCAACGAGCGCAACCC	GGATTAGATACCCTGGTAGTCCACGCCGTAAACGATGAGTGCTAGGTGTTGGGGGTTTCAATACCCTCAGTGCCGCAGCTAACGCAATAAGCACTCCGCCTGGGGAGTACGCTCGCAAGAGTGAAACTCAAAGGAATTGACGGGGGCCCGCACAAGCGGTGGAGCATGTGGTTTAATTCGAAGCAACGCGAAGAACCTTACCAGGTCTTGACATCCCGCTGACCGCTCTAGAGATAGGGCTTCCCTTCGGGGCAGCGGTGACAGGTGGTGCATGGTTGTCGTCAGCTCGTGTCGTGAGATGTTGGGTTAAGTCCCGCAACGAGCGCAACCC	0	0	0	0	0	0	7	0	0	2	9	2.25	9	7	2	4	22	5.5	20	18	35	41	114	28.5	12
Brevibacillus_sediminis_1	S	1	0	Aged_1_100572	99.091	100	N	Brevibacillus_sediminis	16SMicrobial|NR_148612.1	-	-	-	-	-	Bacteria	Firmicutes	Bacilli	Bacillales	Paenibacillaceae	Brevibacillus	Brevibacillus_sediminis	Aged_1_100572;Aged_1_103542;Aged_1_1430	GGATTAGATACCCTGGTAGTCCACGCCGTAAACGATGAGTGCTAGGTGTTGGAGGGGTCCACCCTTCAGTGCCGCAGCTAACGCAATAAGCACTCCGCCTGGGGAGTACGCTCGCAAGAGTGAAACTCAAAGGAATTGACGGGGGCCCGCACAAGCGGTGGAGCATGTGGTTTAATTCGAAGCAACGCGAAGAACCTTACCAGGTCTTGACATCCCGCTGACCGTCCCAGAGATGGGGCTTCCCTTCGGGGCAGCGGTGACAGGTGGTGCATGGTTGTCGTCAGCTCGTGTCGTGAGATGTTGGGTTAAGTCCCGCAACGAGCGCAACCC	GGATTAGATACCCTGGTAGTCCACGCCGTAAACGATGAGTGCTAGGTGTTGGAGGGGTCCACCCTTCAGTGCCGCAGCTAACGCAATAAGCACTCCGCCTGGGGAGTACGCTCGCAAGAGTGAAACTCAAAGGAATTGACGGGGGCCCGCACAAGCGGTGGAGCGTGTGGTTTAATTCGAAGCAACGCGAAGAACCTTACCAGGTCTTGACATCCCGCTGACCGCTCCAGAGATGGGGCTTCCCTTCGGGGCAGCGGTGACAGGTGGTGCATGGTTGTCGTCAGCTCGTGTCGTGAGATGTTGGGTTAAGTCCCGCAACGAGCGCAACCC	2	471	1	0	474	118.5	25	89	95	20	229	57.25	83	40	41	439	603	150.75	11	16	21	25	73	18.25	15
Brevibacillus_thermoruber_1	S	1	0	Aged_1_116956	100	100	N	Brevibacillus_thermoruber	16SMicrobial|NR_112213.1	Bacillales_MS	3	Bacillus_licheniformis;Brevibacillus_brevis;Brevibacillus_thermoruber	nt|AB362290.1;nt|JN366784.1;nt|KR263163.1;silva|AB112722.1.1500;silva|KR263163.1.1375	100.0/100.0	Bacteria	Firmicutes	Bacilli	Bacillales	Paenibacillaceae	Brevibacillus	Brevibacillus_thermoruber	Aged_1_145233;Aged_1_85975;Aged_1_116956;Aged_1_111098;Aged_1_44883;Aged_1_121312;Aged_1_61694	GGATTAGATACCCTGGTAGTCCACGCCGTAAACGATGAGTGCTAGGTGTTGGGGGTTTCAATACCCTCAGTGCCGCAGCTAACGCAATAAGCACTCCGCCTGGGGAGTACGCTCGCAAGAGTGAAACTCAAAGGAATTGACGGGGGCCCGCACAAGCGGTGGAGCATGTGGTTTAATTCGAAGCAACGCGAAGAACCTTACCAGGTCTTGACATCCCGCTGACCGCCCTAGAGATAGGGCTTCCCTTCGGGGCAGCGGTGACAGGTGGTGCATGGTTGTCGTCAGCTCGTGTCGTGAGATGTTGGGTTAAGTCCCGCAACGAGCGCAACCC	GGATTAGATACCCTGGTAGTCCACGCCGTAAACGATGAGTGCTAGGTGTTGGGGGTTTCAATACCCTCAGTGCCGCAGCTAACGCAATAAGCACTCCGCCTGGGGAGTACGCTCGCAAGAGTGAAACTCAAAGGAATTGACGGGGGCCCGCACAAGCGGTGGAGCATGTGGTTTAATTCGAAGCAACGCGAAGAACCTTACCAGGTCTTGACATCCCGCTGACCGCCCTAGAGATAGGGCTTCCCTTCGGGGCAGCGGTGACAGGTGGTGCATGGTTGTCGTCAGCTCGTGTCGTGAGATGTTGGGTTAAGTCCCGCAACGAGCGCAACCC	0	0	0	0	0	0	5	17	34	19	75	18.75	36	23	71	16	146	36.5	4	7	12	4	27	6.75	1
Brevibacillus_thermoruber_2	S	5	0	Aged_1_101139	100	100	N	Brevibacillus_thermoruber	nt|AY196006.1;silva|AY196006.1.1542	-	-	-	-	-	Bacteria	Firmicutes	Bacilli	Bacillales	Paenibacillaceae	Brevibacillus	Brevibacillus_thermoruber	Aged_1_126750;Aged_1_157438;Aged_1_101139;Aged_1_107233;Aged_1_118470;Aged_1_1155;Aged_1_100687;Aged_1_121051	GGATTAGATACCCTGGTAGTCCACGCCGTAAACGATGAGTGCTAGGTGTTGGGGGTTTCAACACCCTCAGTGCCGCAGCTAACGCAATAAGCACTCCGCCTGGGGAGTACGCTCGCAAGAGTGAAACTCAAAGGAATTGACGGGGGCCCGCACAAGCGGTGGAGCATGTGGTTTAATTCGAAGCAACGCGAAGAACCTTACCAGGTCTTGACATCCCGCTGACCGCCCTAGAGATAGGGCTTCCCTTCGGGGCAGCGGTGACAGGTGGTGCATGGTTGTCGTCAGCTCGTGTCGTGAGATGTTGGGTTAAGTCCCGCAACGAGCGCAACCC	GGATTAGATACCCTGGTAGTCCACGCCGTAAACGATGAGTGCTAGGTGTTGGGGGTTTCAACACCCTCAGTGCCGCAGCTAACGCAATAAGCACTCCGCCTGGGGAGTACGCTCGCAAGAGTGAAACTCAAAGGAATTGACGGGGGCCCGCACAAGCGGTGGAGCATGTGGTTTAATTCGAAGCAACGCGAAGAACCTTACCAGGTCTTGACATCCCGCTGACCGCCCTAGAGATAGGGCTTCCCTTCGGGGCAGCGGTGACAGGTGGTGCATGGTTGTCGTCAGCTCGTGTCGTGAGATGTTGGGTTAAGTCCCGCAACGAGCGCAACCC	66	71	11	41	189	47.25	27	20	78	45	170	42.5	37	10	16	196	259	64.75	17	14	15	22	68	17	7
Brevundimonas_MS_1	S	1	4	Litter_2_16230	100	100	N	Brevundimonas_diminuta;Brevundimonas_faecalis;Brevundimonas_naejangsanensis;Brevundimonas_olei	16SMicrobial|NR_113238.1;16SMicrobial|NR_116722.1;16SMicrobial|NR_117187.1;16SMicrobial|NR_117268.1	SpeciesWithAmbiguousDomains_MS	10	Brevundimonas_bullata;Brevundimonas_diminuta;Brevundimonas_faecalis;Brevundimonas_naejangsanensis;Brevundimonas_olei;Brevundimonas_subvibrioides;Brevundimonas_terrae;Brevundimonas_vancanneytii;Brevundimonas_vesicularis;Parastrongyloides_trichosuri	nt|AB680378.1;nt|AB731591.1;nt|FN433028.1;nt|KF387655.1;nt|KM873029.1;nt|KP402409.1;nt|LM523557.1;nt|LT160850.1;nt|MF111616.1;silva|AB167225.1.1343;silva|AB731591.1.971;silva|AJ227779.1.1418;silva|FN433028.1.1450;silva|FR775448.1.1323;silva|KF054812.1.1401;silva|KM873029.1.1358;silva|MF111616.1.948	100.0/100.0	Bacteria	Proteobacteria	Alphaproteobacteria	Caulobacterales	Caulobacteraceae	Brevundimonas	Brevundimonas_MS	Aged_2_24856;Litter_2_16230	GGCTTAGATACCCTGGTAGTCCACGCCGTAAACGATGATTGCTAGTTGTCGGGCTGCATGCAGTTCGGTGACGCAGCTAACGCATTAAGCAATCCGCCTGGGGAGTACGGTCGCAAGATTAAAACTCAAAGGAATTGACGGGGGCCCGCACAAGCGGTGGAGCATGTGGTTTAATTCGAAGCAACGCGCAGAACCTTACCACCTTTTGACATGCCTGGACCGCCACGGAGACGTGGCTTTCCCTTCGGGGACTAGGACACAGGTGCTGCATGGCTGTCGTCAGCTCGTGTCGTGAGATGTTGGGTTAAGTCCCGCAACGAGCGCAACCC	GGATTAGATACCCTGGTAGTCCACGCCGTAAACGATGATTGCTAGTTGTCGGGCTGCATGCAGTTCGGTGACGCAGCTAACGCATTAAGCAATCCGCCTGGGGAGTACGGTCGCAAGATTAAAACTCAAAGGAATTGACGGGGGCCCGCACAAGCGGTGGAGCATGTGGTTTAATTCGAAGCAACGCGCAGAACCTTACCACCTTTTGACATGCCTGGACCGCCACGGAGACGTGGCTTTCCCTTCGGGGACTAGGACACAGGTGCTGCATGGCTGTCGTCAGCTCGTGTCGTGAGATGTTGGGTTAAGTCCCGCAACGAGCGCAACCC	0	0	0	0	0	0	1	1	0	0	2	0.5	3	7	9	11	30	7.5	46	43	31	70	190	47.5	16
Brockia_1	G	1	0	Middle_2_121485	100	100	N	Brockia	silva|FB741921.1.899	-	-	-	-	-	Bacteria	Firmicutes	Clostridia	Thermoanaerobacterales	Thermoanaerobacteraceae	Brockia	Brockia	Middle_1_138069;Middle_2_121485;Aged_1_114337	GGATTAGATACCCTGGTAGTCCCAGCCGTAAACGATGGGTGCTAGGTGTGGGGGGTGTAGGCCCTCCGTGCCGCAGCTAACGCATTAAGCACCCCGCCTGGGGAGTACGGCCGCAAGGTTGAAACTCAAAGGAATTGACGGGGGCCCGCACAAGCGGTGGAGCATGTGGTTTAATTCGATGCTAACCGAAGAACCTTACCAGGGCTTGACATGCCGGAGGTAGGGAGCCGAAAGGCGACCGACCCGGCCTTGGGGCCGGGAGCCGGCACAGGTGGTGCATGGTTGTCGTCAGCTCGTGCCGTGAGGTGTTGGGTTAAGTCCCGCAACGAGCGCGACCC	GGATTAGATACCCTGGTAGTCCCAGCCGTAAACGATGGGTGCTAGGTGTGGGGGGTGTAGGCCCTCCGTGCCGCAGCTAACGCATTAAGCACCCCGCCTGGGGAGTACGGCCGCAAGGTTGAAACTCAAAGGAATTGACGGGGGCCCGCACAAGCGGTGGAGCATGTGGTTTAATTCGATGCTAACCGAAGAACCTTACCAGGGCTTGACATGCCGGAGGTAGGGAGCCGAAAGGCGACCGACCCGGCCTTGGGGCCGGGAGCCGGCACAGGTGGTGCATGGTTGTCGTCAGCTCGTGCCGTGAGGTGTTGGGTTAAGTCCCGCAACGAGCGCAACCC	0	0	0	0	0	0	10	1	1	0	12	3	5	8	11	8	32	8	38	30	11	13	92	23	6
Brockia_2	G	1	0	Aged_1_19951	99.408	100	Y	Brockia	silva|GP496092.1.686	-	-	-	-	-	Bacteria	Firmicutes	Clostridia	Thermoanaerobacterales	Thermoanaerobacteraceae	Brockia	Brockia	Aged_1_19951;Compost_2_122776;Middle_4_53663	GGATTAGATACCCTGGTAGTCCACGCCGTAAACGATGGGTGCTAGGTGTGGGGGGTGTAGGCCCTCCGTGCCGCAGCTAACGCATTAAGCACCCCGCCTGGGGAGTACGGCCGCAAGGTTGAAACTCAAAGGAATTGACGGGGGCCCGCACAAGCGGTGGAGCATGTGGTTTAATTCGATGCTAACCGAAGAACCTTACCAGGGCTTGACATGCCGGAGGTAGGGAGCCGAAAGGCGACCGACCCGGCCTTCGGGCCGGGAGCCGGCACAGGTGGTGCATGGTTGTCGTCAGCTCGTGCCGTGAGGTGTTGGGTTAAGTCCCGCAACGAGCGCAACCC	GGATTAGATACCCCGGTAGTCCACGCCGTAAACGATGGGTGCTAGGTGTGGGGGGTGTAGGCCCTCCGTGCCGCAGCTAACGCATTAAGCACCCCGCCTGGGGAGTACGGCCGCAAGGTTGAAACTCAAAGGAATTGACGGGGGCCCGCACATGCGGTGGAGCATGTGGTTTAATTCGATGCTAACCGAAGAACCTTACCAGGGCTTGACATGCCGGAGGTAGGGAGCCGAAAGGCGACCGACCCGGTCTTCGGGCCGGGAGCCGGCACAGGTGGTGCATGGTTGTCGTCAGCTCGTGCCGTGAGGTGTTGGGTTAAGTCCCGCAACGAGCGCAACCC	0	0	0	0	0	0	1	0	0	0	1	0.25	2	0	1	2	5	1.25	16	15	13	22	66	16.5	21
Bryobacter_1	G	1	0	Aged_1_142106	99.096	100	N	Bryobacter	silva|EU131972.1.1313	-	-	-	-	-	Bacteria	Acidobacteria	Solibacteres	Solibacterales	Solibacteraceae	Bryobacter	Bryobacter	Aged_1_142106;Aged_1_35225;Aged_1_111689	GGATTAGATACCCTGGTAGTCCACGCCCTAAACGATGCATACTTGGTGTGGGTAATTCATTTTATCCGTGCCGGAGCTAACGCGTTAAGTATGCCGCCTGGGGAGTACGGTCGCAAGGCTGAAACTCAAAGGAATTGACGGGGGCCCGCACAAGCGGTGGAGCATGTGGTTTAATTCGACGCAACGCGAAGAACCTTACCTGGGCTCGAACGGCTTTGGCAAGGCTTTGGAAACAGAGCCCCTCCCGCAAGGGACTGAAGTCGAGGTGCTGCATGGCTGTCGTCAGCTCGTGTCGTGAGATGTTGGGTTAAGTCCCGCAACGAGCGCAACCC	GGATTAGATACCCTGGTAGTCCACGCCCTAAACGATGCATACTTGGTGTGGGTAATTCATTTTATCCGTGCCGGAGCTAACGCGTTAAGTATGCCGCCTGGGGAGTACGGTCGCAAGGCTGAAACTCAAAGGAATTGACGGGGGCCCGCACAAGCGGTGGAGCATGTGGTTTAATTCGACGCAACGCGAAGAACCTTACCTGGGCTCGAACGGCTTCGGCAAGGCTTTGGAAACAGAGCCCCTCCCGCAAGGGACCGGAGTCGAGGTGCTGCATGGCTGTCGTCAGCTCGTGTCGTGAGATGTTGGGTTAAGTCCCGCAACGAGCGCAACCC	0	0	0	0	0	0	0	0	4	0	4	1	1	1	2	2	6	1.5	17	24	65	47	153	38.25	4
[truncated: 2,251 more rows]
[truncated: 7 more columns]

## Sheet: Phyla-level taxa composition
Number of count of member of each identified phyla in each compost phase
[truncated: 57 more rows]

## Sheet: Correlation (Spearman r)
	Temperature	O.M.	pH	TC	Cellulose	Hemicellulose	Lignine	TN	NH4	NO2-NO3	Pseudoxanthomonas_taiwanensis_1	Sphingobacterium_thermophilum_1	Microbacterium_MS_7	Schlegelella_thermodepolymerans_2	Streptomyces_thermocoprophilus_1	Chelativorans_composti_1	Chelatococcus_daeguensis_1	Mesorhizobium_MS_2	Streptococcus_equinus_1	Thermobifida_fusca_1	Bacillus_kokeshiiformis_1	Ammoniibacillus_agariperforans_1	Bacillus_MS_19	Brevibacillus_panacihumi_1	Planifilum_fimeticola_1	Symbiobacterium_thermophilum_1	Symbiobacterium_thermophilum_2	Saccharopolyspora_rectivirgula_1	Thermomicrobium_carboxidum_1	Ureibacillus_terrenus_1	Thermobispora_bispora_2	Thermobispora_bispora_1	Rhodothermus_profundi_1	Anoxybacillus_toebii_1	Geobacillus_thermodenitrificans_1	Brevibacillus_thermoruber_2	Geobacillus_MS_1	Planifilum_yunnanense_1	Bacillus_borbori_1	Thermomonospora_chromogena_3	Brevibacillus_MS_2	Thermobacillus_composti_1	Ureibacillus_thermosphaericus_1	Thermoactinomyces_MS_1	Ruminiclostridium_stercorarium_1	Methanobacteriaceae_MS_1	Thermomonospora_curvata_1	Methanosarcina_MS_4	Micromonospora_pallida_1
[truncated: 60 more rows]
[truncated: 11 more columns]

[truncated: 6 more sheets: DA Litter vs Young, DA Young vs Middle, DA Middle vs Aged, DA Aged vs Compost, DA Functional references, References]
